# Supplementary material for: Mechanochemical synthesis of an elusive fluorinated polyacetylene
Source: Springer Nature journal article supplement (doi:10.1038/s41557-020-00608-8), 2020-12-21
Supplement: 41557_2020_608_MOESM10_ESM.cif [file 41557_2020_608_MOESM10_ESM.cif]

 
data_su1805

_publ_section_title           SU1805
_publ_contact_author_name     'Ben Boswell'
_publ_contact_author_address  
'Dept. of Chemistry, Stanford University'
_publ_contact_author_email    bbos@stanford.edu
_publ_contact_author_phone    ?
 
_audit_creation_method            'SHELXL-2017/1'
_shelx_SHELXL_version_number      '2017/1'
_chemical_name_systematic         ?
_chemical_name_common             ?
_chemical_melting_point           ?
_chemical_formula_moiety          
 'C12 H8 F6' 
_chemical_formula_sum
 'C12 H8 F6' 
_chemical_formula_weight          266.18

loop_
 _atom_type_symbol
 _atom_type_description
 _atom_type_scat_dispersion_real
 _atom_type_scat_dispersion_imag
 _atom_type_scat_source
 'C'  'C'   0.0181   0.0091
 'International Tables Vol C Tables 4.2.6.8 and 6.1.1.4'
 'H'  'H'   0.0000   0.0000
 'International Tables Vol C Tables 4.2.6.8 and 6.1.1.4'
 'F'  'F'   0.0727   0.0534
 'International Tables Vol C Tables 4.2.6.8 and 6.1.1.4'
 
_space_group_crystal_system       monoclinic
_space_group_IT_number            14
_space_group_name_H-M_alt         'P 21/n'
_space_group_name_Hall            '-P 2yn'
 
_shelx_space_group_comment
;
The symmetry employed for this shelxl refinement is uniquely defined
by the following loop, which should always be used as a source of
symmetry information in preference to the above space-group names.
They are only intended as comments.
;
 
loop_
 _space_group_symop_operation_xyz
 'x, y, z'
 '-x+1/2, y+1/2, -z+1/2'
 '-x, -y, -z'
 'x-1/2, -y-1/2, z-1/2'
 
_cell_length_a                    5.6034(2)
_cell_length_b                    18.2661(5)
_cell_length_c                    10.1427(3)
_cell_angle_alpha                 90
_cell_angle_beta                  102.3070(10)
_cell_angle_gamma                 90
_cell_volume                      1014.27(5)
_cell_formula_units_Z             4
_cell_measurement_temperature     120(2)
_cell_measurement_reflns_used     9860
_cell_measurement_theta_min       4.46
_cell_measurement_theta_max       71.83
 
_exptl_crystal_description        block
_exptl_crystal_colour             colorless
_exptl_crystal_density_meas       ?
_exptl_crystal_density_method     ?
_exptl_crystal_density_diffrn     1.743          
_exptl_crystal_F_000              536
_exptl_transmission_factor_min    ?
_exptl_transmission_factor_max    ?
_exptl_crystal_size_max           0.228
_exptl_crystal_size_mid           0.211
_exptl_crystal_size_min           0.134
_exptl_absorpt_coefficient_mu     1.606
_shelx_estimated_absorpt_T_min    0.711
_shelx_estimated_absorpt_T_max    0.814
_exptl_absorpt_correction_type    numerical
_exptl_absorpt_correction_T_min   0.7207
_exptl_absorpt_correction_T_max   0.8891
_exptl_absorpt_process_details    
'SADABS (Krause et al., 2015)'
_exptl_absorpt_special_details    ?
_diffrn_ambient_temperature       120(2) 
_diffrn_radiation_wavelength      1.54184 
_diffrn_radiation_type            CuK\a 
_diffrn_radiation_source          'micro-focus tube' 
_diffrn_radiation_monochromator   'MONTEL multi-layer' 
_diffrn_measurement_device_type   'Bruker APEX-II'
_diffrn_measurement_method        
'combination of \w and \f-scans '
_diffrn_detector_area_resol_mean  8.33 
_diffrn_reflns_number             29602
_diffrn_reflns_av_unetI/netI      0.0135
_diffrn_reflns_av_R_equivalents   0.0343
_diffrn_reflns_limit_h_min        -6
_diffrn_reflns_limit_h_max        6
_diffrn_reflns_limit_k_min        -22
_diffrn_reflns_limit_k_max        22
_diffrn_reflns_limit_l_min        -12
_diffrn_reflns_limit_l_max        12
_diffrn_reflns_theta_min          4.842
_diffrn_reflns_theta_max          72.163
_diffrn_reflns_theta_full         67.679
_diffrn_measured_fraction_theta_max   0.999
_diffrn_measured_fraction_theta_full  0.999
_diffrn_reflns_Laue_measured_fraction_max    0.999
_diffrn_reflns_Laue_measured_fraction_full   0.999
_diffrn_reflns_point_group_measured_fraction_max   0.999
_diffrn_reflns_point_group_measured_fraction_full  0.999
_reflns_number_total              1996
_reflns_number_gt                 1921
_reflns_threshold_expression      'I > 2\s(I)'
_reflns_Friedel_coverage          0.000
_reflns_Friedel_fraction_max      .
_reflns_Friedel_fraction_full     .
 
_reflns_special_details
;
 Reflections were merged by SHELXL according to the crystal
 class for the calculation of statistics and refinement.
 
 _reflns_Friedel_fraction is defined as the number of unique
 Friedel pairs measured divided by the number that would be
 possible theoretically, ignoring centric projections and
 systematic absences.
;
 
_computing_data_collection        'Bruker APEX-3 (Bruker, 2017)' 
_computing_cell_refinement        'Bruker SAINT (Bruker, 2017)' 
_computing_data_reduction         'Bruker SAINT (Bruker, 2017)' 
_computing_structure_solution     'SHELXT-2014/2 (Sheldrick, 2015a)' 
_computing_structure_refinement   'SHELXL-2017/1 (Sheldrick, 2015b)'
_computing_molecular_graphics     'Bruker XP (Bruker, 2107)'
_computing_publication_material   'CIFTAB (Sheldrick, 2008)'
_refine_special_details           ?
_refine_ls_structure_factor_coef  Fsqd
_refine_ls_matrix_type            full
_refine_ls_weighting_scheme       calc
_refine_ls_weighting_details
'w=1/[\s^2^(Fo^2^)+(0.0595P)^2^+0.3838P] where P=(Fo^2^+2Fc^2^)/3'
_atom_sites_solution_primary      dual
_atom_sites_solution_secondary    direct
_atom_sites_solution_hydrogens    geom
_refine_ls_hydrogen_treatment     constr
_refine_ls_extinction_method      none
_refine_ls_extinction_coef        .
_refine_ls_number_reflns          1996
_refine_ls_number_parameters      163
_refine_ls_number_restraints      0
_refine_ls_R_factor_all           0.0356
_refine_ls_R_factor_gt            0.0345
_refine_ls_wR_factor_ref          0.1039
_refine_ls_wR_factor_gt           0.1030
_refine_ls_goodness_of_fit_ref    1.110
_refine_ls_restrained_S_all       1.110
_refine_ls_shift/su_max           0.001
_refine_ls_shift/su_mean          0.000
 
loop_
 _atom_site_label
 _atom_site_type_symbol
 _atom_site_fract_x
 _atom_site_fract_y
 _atom_site_fract_z
 _atom_site_U_iso_or_equiv
 _atom_site_adp_type
 _atom_site_occupancy
 _atom_site_site_symmetry_order  
 _atom_site_calc_flag
 _atom_site_refinement_flags_posn
 _atom_site_refinement_flags_adp
 _atom_site_refinement_flags_occupancy
 _atom_site_disorder_assembly
 _atom_site_disorder_group
C1 C 0.3939(2) 0.55549(7) 0.35063(14) 0.0224(3) Uani 1 1 d . . . . .
C2 C 0.4952(2) 0.62218(7) 0.42753(13) 0.0191(3) Uani 1 1 d . . . . .
C3 C 0.4237(2) 0.69495(7) 0.35619(13) 0.0181(3) Uani 1 1 d . . . . .
C4 C 0.5087(2) 0.76263(7) 0.44016(13) 0.0201(3) Uani 1 1 d . . . . .
H4 H 0.668530 0.761439 0.506699 0.024 Uiso 1 1 calc R U . . .
C5 C 0.4265(3) 0.83401(8) 0.36299(14) 0.0243(3) Uani 1 1 d . . . . .
H5 H 0.416323 0.835596 0.263392 0.029 Uiso 1 1 calc R U . . .
C6 C 0.5108(3) 0.90310(8) 0.44788(16) 0.0321(3) Uani 1 1 d . . . . .
H6A H 0.526505 0.946889 0.392860 0.038 Uiso 1 1 calc R U . . .
H6B H 0.660892 0.895504 0.518242 0.038 Uiso 1 1 calc R U . . .
C7 C 0.2735(3) 0.90220(8) 0.50337(16) 0.0312(3) Uani 1 1 d . . . . .
H7A H 0.302213 0.893200 0.601750 0.037 Uiso 1 1 calc R U . . .
H7B H 0.169526 0.945939 0.478025 0.037 Uiso 1 1 calc R U . . .
C8 C 0.1829(3) 0.83391(8) 0.41706(14) 0.0241(3) Uani 1 1 d . . . . .
H8 H 0.022686 0.836089 0.350974 0.029 Uiso 1 1 calc R U . . .
C9 C 0.2592(2) 0.76220(7) 0.49407(13) 0.0199(3) Uani 1 1 d . . . . .
H9 H 0.267067 0.760330 0.593436 0.024 Uiso 1 1 calc R U . . .
C10 C 0.1768(2) 0.69470(7) 0.40875(13) 0.0181(3) Uani 1 1 d . . . . .
C11 C 0.2497(2) 0.62205(7) 0.48056(13) 0.0190(3) Uani 1 1 d . . . . .
C12 C 0.1877(2) 0.55531(7) 0.39529(13) 0.0215(3) Uani 1 1 d . . . . .
F1 F 0.46433(15) 0.52094(5) 0.25084(9) 0.0298(2) Uani 1 1 d . . . . .
F2 F 0.71574(14) 0.61775(4) 0.51610(8) 0.0231(2) Uani 1 1 d . . . . .
F3 F 0.43179(14) 0.69617(4) 0.22190(7) 0.0230(2) Uani 1 1 d . . . . .
F4 F -0.05034(14) 0.69584(4) 0.32482(8) 0.0230(2) Uani 1 1 d . . . . .
F5 F 0.25439(15) 0.61833(4) 0.61498(8) 0.0233(2) Uani 1 1 d . . . . .
F6 F -0.02288(15) 0.52082(4) 0.35623(8) 0.0271(2) Uani 1 1 d . . . . .
 
loop_
 _atom_site_aniso_label
 _atom_site_aniso_U_11
 _atom_site_aniso_U_22
 _atom_site_aniso_U_33
 _atom_site_aniso_U_23
 _atom_site_aniso_U_13
 _atom_site_aniso_U_12
C1 0.0230(7) 0.0192(6) 0.0242(6) -0.0026(5) 0.0035(5) 0.0017(5)
C2 0.0158(6) 0.0207(7) 0.0204(6) -0.0006(5) 0.0027(5) 0.0002(5)
C3 0.0167(6) 0.0214(6) 0.0168(6) 0.0004(5) 0.0046(5) -0.0010(5)
C4 0.0202(6) 0.0196(7) 0.0204(6) 0.0000(5) 0.0043(5) -0.0018(5)
C5 0.0285(7) 0.0211(7) 0.0236(6) 0.0039(5) 0.0061(5) -0.0022(5)
C6 0.0383(9) 0.0193(7) 0.0376(8) 0.0016(6) 0.0059(7) -0.0048(6)
C7 0.0434(9) 0.0178(7) 0.0330(8) 0.0008(6) 0.0093(6) 0.0024(6)
C8 0.0269(7) 0.0198(7) 0.0254(7) 0.0030(5) 0.0049(5) 0.0021(5)
C9 0.0217(6) 0.0183(6) 0.0205(6) 0.0009(5) 0.0057(5) 0.0003(5)
C10 0.0159(6) 0.0202(6) 0.0186(6) 0.0015(5) 0.0041(5) 0.0000(5)
C11 0.0185(6) 0.0202(6) 0.0187(6) 0.0005(5) 0.0045(5) -0.0020(5)
C12 0.0211(6) 0.0179(6) 0.0244(7) 0.0003(5) 0.0025(5) -0.0026(5)
F1 0.0282(4) 0.0294(5) 0.0329(5) -0.0121(3) 0.0087(3) 0.0014(3)
F2 0.0175(4) 0.0233(4) 0.0260(4) 0.0007(3) -0.0006(3) 0.0008(3)
F3 0.0236(4) 0.0295(4) 0.0170(4) 0.0000(3) 0.0069(3) -0.0011(3)
F4 0.0157(4) 0.0269(4) 0.0253(4) 0.0024(3) 0.0019(3) -0.0003(3)
F5 0.0290(4) 0.0231(4) 0.0187(4) 0.0025(3) 0.0068(3) -0.0028(3)
F6 0.0225(4) 0.0243(4) 0.0337(5) -0.0039(3) 0.0044(3) -0.0079(3)
 
_geom_special_details
;
 All esds (except the esd in the dihedral angle between two l.s. planes)
 are estimated using the full covariance matrix.  The cell esds are taken
 into account individually in the estimation of esds in distances, angles
 and torsion angles; correlations between esds in cell parameters are only
 used when they are defined by crystal symmetry.  An approximate (isotropic)
 treatment of cell esds is used for estimating esds involving l.s. planes.
;
 
loop_
 _geom_bond_atom_site_label_1
 _geom_bond_atom_site_label_2
 _geom_bond_distance
 _geom_bond_site_symmetry_2
 _geom_bond_publ_flag
C1 F1 1.3223(16) . ?
C1 C12 1.328(2) . ?
C1 C2 1.4919(17) . ?
C2 F2 1.3664(15) . ?
C2 C3 1.5257(17) . ?
C2 C11 1.5802(18) . ?
C3 F3 1.3726(15) . ?
C3 C4 1.5192(17) . ?
C3 C10 1.5852(17) . ?
C4 C5 1.5399(17) . ?
C4 C9 1.6063(18) . ?
C4 H4 1.0000 . ?
C5 C6 1.5439(19) . ?
C5 C8 1.5760(19) . ?
C5 H5 1.0000 . ?
C6 C7 1.550(2) . ?
C6 H6A 0.9900 . ?
C6 H6B 0.9900 . ?
C7 C8 1.5462(19) . ?
C7 H7A 0.9900 . ?
C7 H7B 0.9900 . ?
C8 C9 1.5382(17) . ?
C8 H8 1.0000 . ?
C9 C10 1.5206(17) . ?
C9 H9 1.0000 . ?
C10 F4 1.3721(15) . ?
C10 C11 1.5271(17) . ?
C11 F5 1.3597(15) . ?
C11 C12 1.4922(17) . ?
C12 F6 1.3219(15) . ?
 
loop_
 _geom_angle_atom_site_label_1
 _geom_angle_atom_site_label_2
 _geom_angle_atom_site_label_3
 _geom_angle
 _geom_angle_site_symmetry_1
 _geom_angle_site_symmetry_3
 _geom_angle_publ_flag
F1 C1 C12 133.10(12) . . ?
F1 C1 C2 130.34(12) . . ?
C12 C1 C2 94.91(11) . . ?
F2 C2 C1 119.04(11) . . ?
F2 C2 C3 118.21(10) . . ?
C1 C2 C3 115.54(11) . . ?
F2 C2 C11 120.46(10) . . ?
C1 C2 C11 85.11(9) . . ?
C3 C2 C11 90.17(9) . . ?
F3 C3 C4 118.05(10) . . ?
F3 C3 C2 115.08(10) . . ?
C4 C3 C2 115.07(11) . . ?
F3 C3 C10 123.34(10) . . ?
C4 C3 C10 90.33(9) . . ?
C2 C3 C10 89.88(9) . . ?
C3 C4 C5 112.33(10) . . ?
C3 C4 C9 89.72(9) . . ?
C5 C4 C9 89.38(9) . . ?
C3 C4 H4 119.3 . . ?
C5 C4 H4 119.3 . . ?
C9 C4 H4 119.3 . . ?
C4 C5 C6 112.69(11) . . ?
C4 C5 C8 90.56(10) . . ?
C6 C5 C8 89.52(11) . . ?
C4 C5 H5 119.0 . . ?
C6 C5 H5 119.0 . . ?
C8 C5 H5 119.0 . . ?
C5 C6 C7 90.56(11) . . ?
C5 C6 H6A 113.5 . . ?
C7 C6 H6A 113.5 . . ?
C5 C6 H6B 113.5 . . ?
C7 C6 H6B 113.5 . . ?
H6A C6 H6B 110.8 . . ?
C8 C7 C6 90.38(11) . . ?
C8 C7 H7A 113.6 . . ?
C6 C7 H7A 113.6 . . ?
C8 C7 H7B 113.6 . . ?
C6 C7 H7B 113.6 . . ?
H7A C7 H7B 110.8 . . ?
C9 C8 C7 112.16(11) . . ?
C9 C8 C5 90.57(10) . . ?
C7 C8 C5 89.53(11) . . ?
C9 C8 H8 119.1 . . ?
C7 C8 H8 119.1 . . ?
C5 C8 H8 119.1 . . ?
C10 C9 C8 112.56(11) . . ?
C10 C9 C4 89.49(9) . . ?
C8 C9 C4 89.49(10) . . ?
C10 C9 H9 119.3 . . ?
C8 C9 H9 119.3 . . ?
C4 C9 H9 119.3 . . ?
F4 C10 C9 118.02(10) . . ?
F4 C10 C11 115.33(10) . . ?
C9 C10 C11 114.54(10) . . ?
F4 C10 C3 123.49(10) . . ?
C9 C10 C3 90.46(9) . . ?
C11 C10 C3 89.93(9) . . ?
F5 C11 C12 119.52(11) . . ?
F5 C11 C10 117.88(10) . . ?
C12 C11 C10 115.33(11) . . ?
F5 C11 C2 120.62(11) . . ?
C12 C11 C2 85.18(9) . . ?
C10 C11 C2 90.02(9) . . ?
F6 C12 C1 133.24(13) . . ?
F6 C12 C11 130.22(12) . . ?
C1 C12 C11 94.80(11) . . ?
 
loop_
 _geom_torsion_atom_site_label_1
 _geom_torsion_atom_site_label_2
 _geom_torsion_atom_site_label_3
 _geom_torsion_atom_site_label_4
 _geom_torsion
 _geom_torsion_site_symmetry_1
 _geom_torsion_site_symmetry_2
 _geom_torsion_site_symmetry_3
 _geom_torsion_site_symmetry_4
 _geom_torsion_publ_flag
F1 C1 C2 F2 -71.19(18) . . . . ?
C12 C1 C2 F2 122.24(12) . . . . ?
F1 C1 C2 C3 78.66(17) . . . . ?
C12 C1 C2 C3 -87.91(13) . . . . ?
F1 C1 C2 C11 166.50(14) . . . . ?
C12 C1 C2 C11 -0.07(10) . . . . ?
F2 C2 C3 F3 107.23(12) . . . . ?
C1 C2 C3 F3 -42.88(15) . . . . ?
C11 C2 C3 F3 -127.54(11) . . . . ?
F2 C2 C3 C4 -35.17(16) . . . . ?
C1 C2 C3 C4 174.72(10) . . . . ?
C11 C2 C3 C4 90.06(11) . . . . ?
F2 C2 C3 C10 -125.48(11) . . . . ?
C1 C2 C3 C10 84.41(12) . . . . ?
C11 C2 C3 C10 -0.25(9) . . . . ?
F3 C3 C4 C5 39.79(15) . . . . ?
C2 C3 C4 C5 -178.98(10) . . . . ?
C10 C3 C4 C5 -88.96(11) . . . . ?
F3 C3 C4 C9 129.01(11) . . . . ?
C2 C3 C4 C9 -89.76(11) . . . . ?
C10 C3 C4 C9 0.26(9) . . . . ?
C3 C4 C5 C6 179.65(11) . . . . ?
C9 C4 C5 C6 90.21(12) . . . . ?
C3 C4 C5 C8 89.94(11) . . . . ?
C9 C4 C5 C8 0.50(9) . . . . ?
C4 C5 C6 C7 -89.36(13) . . . . ?
C8 C5 C6 C7 1.04(10) . . . . ?
C5 C6 C7 C8 -1.06(11) . . . . ?
C6 C7 C8 C9 91.46(12) . . . . ?
C6 C7 C8 C5 1.04(10) . . . . ?
C4 C5 C8 C9 -0.52(10) . . . . ?
C6 C5 C8 C9 -113.21(11) . . . . ?
C4 C5 C8 C7 111.64(10) . . . . ?
C6 C5 C8 C7 -1.05(10) . . . . ?
C7 C8 C9 C10 -178.46(11) . . . . ?
C5 C8 C9 C10 -88.74(12) . . . . ?
C7 C8 C9 C4 -89.22(12) . . . . ?
C5 C8 C9 C4 0.50(9) . . . . ?
C3 C4 C9 C10 -0.27(9) . . . . ?
C5 C4 C9 C10 112.06(10) . . . . ?
C3 C4 C9 C8 -112.84(10) . . . . ?
C5 C4 C9 C8 -0.51(10) . . . . ?
C8 C9 C10 F4 -39.51(15) . . . . ?
C4 C9 C10 F4 -128.74(11) . . . . ?
C8 C9 C10 C11 179.63(10) . . . . ?
C4 C9 C10 C11 90.39(11) . . . . ?
C8 C9 C10 C3 89.49(11) . . . . ?
C4 C9 C10 C3 0.26(9) . . . . ?
F3 C3 C10 F4 -0.15(18) . . . . ?
C4 C3 C10 F4 124.38(12) . . . . ?
C2 C3 C10 F4 -120.55(12) . . . . ?
F3 C3 C10 C9 -124.80(12) . . . . ?
C4 C3 C10 C9 -0.28(9) . . . . ?
C2 C3 C10 C9 114.80(10) . . . . ?
F3 C3 C10 C11 120.66(12) . . . . ?
C4 C3 C10 C11 -114.81(10) . . . . ?
C2 C3 C10 C11 0.26(9) . . . . ?
F4 C10 C11 F5 -107.46(13) . . . . ?
C9 C10 C11 F5 34.48(16) . . . . ?
C3 C10 C11 F5 124.95(11) . . . . ?
F4 C10 C11 C12 42.66(15) . . . . ?
C9 C10 C11 C12 -175.40(11) . . . . ?
C3 C10 C11 C12 -84.93(12) . . . . ?
F4 C10 C11 C2 127.34(11) . . . . ?
C9 C10 C11 C2 -90.72(11) . . . . ?
C3 C10 C11 C2 -0.25(9) . . . . ?
F2 C2 C11 F5 0.71(17) . . . . ?
C1 C2 C11 F5 121.71(12) . . . . ?
C3 C2 C11 F5 -122.67(12) . . . . ?
F2 C2 C11 C12 -120.93(12) . . . . ?
C1 C2 C11 C12 0.06(9) . . . . ?
C3 C2 C11 C12 115.69(10) . . . . ?
F2 C2 C11 C10 123.64(12) . . . . ?
C1 C2 C11 C10 -115.36(10) . . . . ?
C3 C2 C11 C10 0.26(9) . . . . ?
F1 C1 C12 F6 -0.3(3) . . . . ?
C2 C1 C12 F6 165.67(15) . . . . ?
F1 C1 C12 C11 -165.90(15) . . . . ?
C2 C1 C12 C11 0.07(11) . . . . ?
F5 C11 C12 F6 70.99(18) . . . . ?
C10 C11 C12 F6 -78.61(17) . . . . ?
C2 C11 C12 F6 -166.34(14) . . . . ?
F5 C11 C12 C1 -122.73(13) . . . . ?
C10 C11 C12 C1 87.67(13) . . . . ?
C2 C11 C12 C1 -0.07(10) . . . . ?
 
loop_
 _geom_hbond_atom_site_label_D 
 _geom_hbond_atom_site_label_H 
 _geom_hbond_atom_site_label_A 
 _geom_hbond_distance_DH 
 _geom_hbond_distance_HA 
 _geom_hbond_distance_DA 
 _geom_hbond_angle_DHA 
 _geom_hbond_site_symmetry_A 
 _geom_hbond_publ_flag
C4 H4 F3  1.00 2.48 3.3858(15) 149.9 4_676 yes
C9 H9 F3  1.00 2.63 3.3303(15) 127.4 4_576 yes
C9 H9 F4  1.00 2.48 3.3844(15) 149.5 4_676 yes
 
_refine_diff_density_max    0.470
_refine_diff_density_min   -0.185
_refine_diff_density_rms    0.054

_shelx_res_file
;
TITL su1805_a.res in P2(1)/n
    su1805.res
    created by SHELXL-2017/1 at 13:41:56 on 14-Mar-2018
REM Old TITL su1805 in P2(1)/n

REM SHELXT solution in P2(1)/n
REM R1 0.089,  Rweak 0.002,  Alpha 0.018,  Orientation as input
REM Formula found by SHELXT:  C12 F6

CELL  1.54178   5.6034  18.2661  10.1427   90.000  102.307   90.000
ZERR    4.000   0.0002   0.0005   0.0003    0.000    0.001    0.000
LATT  1
SYMM 1/2-X, 1/2+Y, 1/2-Z
SFAC C H F
UNIT 48 32 24
TEMP -153.020
SIZE 0.134 0.211 0.228

L.S. 10
BOND $H
FMAP 2
PLAN 20
CONF

EQIV $1 x+1/2, -y+3/2, z+1/2
EQIV $2 x-1/2, -y+3/2, z+1/2
HTAB C4 F3_$1
HTAB C9 F3_$2
HTAB C9 F4_$1

ACTA

WGHT    0.059500    0.383800
FVAR       0.23200
C1    1    0.393893    0.555486    0.350632    11.00000    0.02300    0.01917 =
         0.02423   -0.00261    0.00353    0.00169
C2    1    0.495237    0.622176    0.427529    11.00000    0.01583    0.02066 =
         0.02036   -0.00060    0.00265    0.00019
C3    1    0.423688    0.694950    0.356186    11.00000    0.01665    0.02141 =
         0.01684    0.00041    0.00464   -0.00098
C4    1    0.508738    0.762631    0.440164    11.00000    0.02022    0.01955 =
         0.02043    0.00003    0.00429   -0.00183
AFIX  13
H4    2    0.668530    0.761439    0.506699    11.00000   -1.20000
AFIX   0
C5    1    0.426495    0.834009    0.362988    11.00000    0.02846    0.02106 =
         0.02362    0.00395    0.00613   -0.00221
AFIX  13
H5    2    0.416323    0.835596    0.263392    11.00000   -1.20000
AFIX   0
C6    1    0.510781    0.903095    0.447884    11.00000    0.03826    0.01935 =
         0.03757    0.00162    0.00586   -0.00481
AFIX  23
H6A   2    0.526505    0.946889    0.392860    11.00000   -1.20000
H6B   2    0.660892    0.895504    0.518242    11.00000   -1.20000
AFIX   0
C7    1    0.273504    0.902196    0.503372    11.00000    0.04336    0.01781 =
         0.03298    0.00084    0.00926    0.00238
AFIX  23
H7A   2    0.302213    0.893200    0.601750    11.00000   -1.20000
H7B   2    0.169526    0.945939    0.478025    11.00000   -1.20000
AFIX   0
C8    1    0.182863    0.833909    0.417062    11.00000    0.02690    0.01976 =
         0.02538    0.00299    0.00491    0.00210
AFIX  13
H8    2    0.022686    0.836089    0.350974    11.00000   -1.20000
AFIX   0
C9    1    0.259196    0.762203    0.494066    11.00000    0.02166    0.01827 =
         0.02047    0.00086    0.00573    0.00031
AFIX  13
H9    2    0.267067    0.760330    0.593436    11.00000   -1.20000
AFIX   0
C10   1    0.176766    0.694697    0.408746    11.00000    0.01588    0.02016 =
         0.01855    0.00150    0.00411   -0.00005
C11   1    0.249744    0.622045    0.480565    11.00000    0.01847    0.02021 =
         0.01866    0.00050    0.00451   -0.00197
C12   1    0.187736    0.555307    0.395287    11.00000    0.02107    0.01794 =
         0.02443    0.00034    0.00246   -0.00258
F1    3    0.464328    0.520943    0.250844    11.00000    0.02817    0.02939 =
         0.03292   -0.01209    0.00868    0.00139
F2    3    0.715740    0.617748    0.516102    11.00000    0.01754    0.02334 =
         0.02601    0.00070   -0.00062    0.00078
F3    3    0.431794    0.696174    0.221905    11.00000    0.02361    0.02954 =
         0.01702   -0.00003    0.00689   -0.00114
F4    3   -0.050340    0.695841    0.324817    11.00000    0.01567    0.02693 =
         0.02528    0.00244    0.00193   -0.00032
F5    3    0.254387    0.618330    0.614982    11.00000    0.02901    0.02314 =
         0.01868    0.00252    0.00682   -0.00281
F6    3   -0.022879    0.520817    0.356225    11.00000    0.02251    0.02432 =
         0.03370   -0.00391    0.00437   -0.00793

HKLF 4


REM  su1805_a.res in P2(1)/n
REM R1 =  0.0345 for    1921 Fo > 4sig(Fo)  and  0.0356 for all    1996 data
REM    163 parameters refined using      0 restraints

END

WGHT      0.0588      0.3926

REM Highest difference peak  0.470,  deepest hole -0.185,  1-sigma level  0.054
Q1    1   0.2807  0.6950  0.3629  11.00000  0.05    0.47
Q2    1   0.3849  0.6207  0.4677  11.00000  0.05    0.47
Q3    1   0.4711  0.6597  0.3835  11.00000  0.05    0.37
Q4    1   0.2021  0.6603  0.4548  11.00000  0.05    0.36
Q5    1   0.4898  0.7254  0.4008  11.00000  0.05    0.34
Q6    1   0.2611  0.5590  0.3401  11.00000  0.05    0.32
Q7    1   0.4031  0.7621  0.4817  11.00000  0.05    0.32
Q8    1   0.2993  0.5412  0.3742  11.00000  0.05    0.32
Q9    1   0.2069  0.5840  0.4522  11.00000  0.05    0.32
Q10   1   0.4870  0.8004  0.3985  11.00000  0.05    0.30
Q11   1   0.2849  0.8355  0.3709  11.00000  0.05    0.29
Q12   1   0.1981  0.8000  0.4643  11.00000  0.05    0.29
Q13   1   0.2056  0.7275  0.4627  11.00000  0.05    0.28
Q14   1   0.4654  0.5870  0.3811  11.00000  0.05    0.28
Q15   1   0.4259  0.9034  0.4929  11.00000  0.05    0.26
Q16   1   0.2015  0.8734  0.4676  11.00000  0.05    0.25
Q17   1   0.4884  0.8703  0.4012  11.00000  0.05    0.24
Q18   1   0.5070  0.8364  0.2848  11.00000  0.05    0.22
Q19   1   0.1777  0.7604  0.5775  11.00000  0.05    0.22
Q20   1  -0.0013  0.8381  0.4001  11.00000  0.05    0.20
;
_shelx_res_checksum   50584

_shelx_hkl_file
;
   1   0   0    0.14    0.03
   1   0   0    0.00    0.02
   1   0   0    0.14    0.02
  -1   0   0    0.00    0.02
   2   0   0   44.03    1.80
   2   0   0   44.85    1.81
   2   0   0   48.81    1.94
   2   0   0   42.82    1.84
  -2   0   0   40.65    1.79
  -2   0   0   43.98    1.81
  -2   0   0   44.02    1.84
   3   0   0    0.08    0.05
   3   0   0    0.22    0.14
   3   0   0    0.13    0.06
   3   0   0    0.02    0.04
   3   0   0    0.18    0.12
   3   0   0    0.00    0.03
   3   0   0    0.00    0.04
  -3   0   0    0.04    0.03
  -3   0   0    0.00    0.04
  -3   0   0    0.00    0.08
  -3   0   0    0.03    0.07
  -3   0   0    0.10    0.05
  -3   0   0    0.12    0.06
   4   0   0  254.47   10.97
   4   0   0  271.98   10.78
   4   0   0  275.28   10.80
   4   0   0  269.37   10.77
   4   0   0  268.87   10.82
   4   0   0  263.56   10.74
  -4   0   0  275.37   10.82
  -4   0   0  272.69   10.75
  -4   0   0  278.94   10.81
  -4   0   0  277.70   10.83
  -4   0   0  268.52   10.77
  -4   0   0  260.87   10.73
   5   0   0   -0.07    0.07
   5   0   0    0.03    0.07
   5   0   0    0.00    0.07
   5   0   0   -0.03    0.10
   5   0   0    0.06    0.07
   5   0   0    0.01    0.09
   5   0   0    0.07    0.06
   5   0   0   -0.07    0.07
   5   0   0    0.03    0.07
   5   0   0    0.07    0.09
   5   0   0    0.00    0.06
  -5   0   0   -0.01    0.07
  -5   0   0    0.05    0.07
  -5   0   0    0.01    0.09
  -5   0   0   -0.01    0.06
  -5   0   0   -0.03    0.07
  -5   0   0    0.06    0.11
  -5   0   0    0.00    0.06
   6   0   0    3.77    0.22
   6   0   0    2.96    0.25
   6   0   0    3.60    0.25
   6   0   0    3.61    0.20
   6   0   0    3.48    0.23
   6   0   0    4.01    0.23
   6   0   0    3.60    0.21
  -6   0   0    3.49    0.27
  -6   0   0    3.77    0.25
  -6   0   0    3.53    0.21
  -6   0   0    3.86    0.22
  -6   0  -1    0.00    0.06
  -6   0  -1    0.02    0.06
  -6   0  -1    0.01    0.06
   6   0   1   -0.08    0.07
   6   0   1    0.04    0.11
   6   0   1    0.03    0.05
   6   0   1   -0.04    0.10
   6   0   1    0.02    0.06
   6   0   1    0.03    0.05
   6   0   1    0.02    0.04
  -5   0  -1    2.60    0.18
  -5   0  -1    2.60    0.20
  -5   0  -1    2.65    0.24
  -5   0  -1    2.54    0.19
   5   0   1    2.55    0.19
   5   0   1    2.52    0.19
   5   0   1    2.12    0.19
   5   0   1    2.40    0.19
   5   0   1    2.02    0.30
   5   0   1    2.19    0.17
   5   0   1    2.73    0.20
   5   0   1    2.75    0.23
  -4   0  -1   -0.04    0.05
  -4   0  -1    0.01    0.06
  -4   0  -1    0.04    0.05
  -4   0  -1   -0.01    0.05
  -4   0  -1    0.00    0.04
  -4   0  -1   -0.04    0.10
  -4   0  -1    0.00    0.06
   4   0   1   -0.01    0.09
   4   0   1    0.04    0.14
   4   0   1    0.00    0.07
   4   0   1    0.12    0.10
   4   0   1    0.12    0.07
  -3   0  -1   23.90    1.07
  -3   0  -1   24.65    1.08
  -3   0  -1   23.66    1.03
  -3   0  -1   24.54    1.04
  -3   0  -1   24.46    1.03
  -3   0  -1   24.82    1.06
   3   0   1   23.86    1.05
   3   0   1   23.59    1.04
   3   0   1   25.03    1.09
   3   0   1   25.00    1.07
   3   0   1   26.46    1.20
   3   0   1   25.54    1.29
   3   0   1   23.66    1.04
  -2   0  -1    0.03    0.04
  -2   0  -1    0.05    0.03
  -2   0  -1   -0.01    0.08
   2   0   1    0.01    0.03
   2   0   1    0.04    0.04
   2   0   1    0.06    0.08
   2   0   1    0.02    0.04
  -1   0  -1    0.29    0.05
   1   0   1    0.28    0.05
   1   0   1    0.27    0.04
   1   0   1    0.26    0.04
   1   0  -1  433.80   16.93
   1   0  -1  431.43   16.76
  -1   0   1  398.72   16.75
  -1   0   1  412.92   16.88
   2   0  -1    0.02    0.04
   2   0  -1    0.05    0.03
   2   0  -1    0.09    0.04
   2   0  -1    0.02    0.03
  -2   0   1    0.01    0.06
  -2   0   1    0.05    0.03
   3   0  -1  151.81    5.92
   3   0  -1  155.16    6.02
   3   0  -1  144.20    5.89
   3   0  -1  141.89    5.90
   3   0  -1  146.48    5.88
  -3   0   1  141.52    5.88
  -3   0   1  147.11    5.91
  -3   0   1  159.51    5.92
  -3   0   1  146.45    5.91
  -3   0   1  137.32    5.86
   4   0  -1    0.11    0.09
   4   0  -1    0.07    0.11
   4   0  -1   -0.05    0.07
   4   0  -1    0.14    0.07
   4   0  -1    0.07    0.07
   4   0  -1    0.07    0.07
  -4   0   1    0.20    0.06
  -4   0   1    0.09    0.08
  -4   0   1    0.10    0.07
  -4   0   1    0.17    0.09
  -4   0   1    0.24    0.09
  -4   0   1    0.20    0.10
   5   0  -1    0.17    0.13
   5   0  -1    0.30    0.09
   5   0  -1    0.22    0.09
   5   0  -1    0.30    0.10
   5   0  -1    0.30    0.08
   5   0  -1    0.28    0.08
   5   0  -1    0.20    0.09
   5   0  -1    0.32    0.09
   5   0  -1    0.28    0.10
   5   0  -1    0.26    0.08
   5   0  -1    0.28    0.08
   5   0  -1    0.35    0.10
   5   0  -1    0.34    0.08
  -5   0   1    0.46    0.10
  -5   0   1    0.23    0.12
  -5   0   1    0.30    0.09
  -5   0   1    0.33    0.10
  -5   0   1    0.45    0.13
  -5   0   1    0.29    0.10
   6   0  -1    0.02    0.06
   6   0  -1    0.05    0.10
   6   0  -1    0.05    0.05
   6   0  -1   -0.03    0.06
   6   0  -1    0.00    0.05
   6   0  -1    0.01    0.05
   6   0  -1   -0.02    0.06
   6   0  -1    0.03    0.08
  -6   0   1    0.03    0.06
  -6   0   1   -0.02    0.10
  -6   0   1    0.13    0.26
  -6   0   1    0.03    0.06
  -6   0  -2    0.67    0.10
  -6   0  -2    0.71    0.10
   6   0   2    0.57    0.10
   6   0   2    0.72    0.09
   6   0   2    0.66    0.11
   6   0   2    0.72    0.14
   6   0   2    0.63    0.07
   6   0   2    0.75    0.09
  -5   0  -2    0.06    0.06
  -5   0  -2   -0.04    0.07
  -5   0  -2   -0.03    0.09
  -5   0  -2    0.06    0.08
   5   0   2   -0.04    0.05
   5   0   2   -0.04    0.06
   5   0   2    0.04    0.06
   5   0   2   -0.06    0.07
   5   0   2    0.02    0.06
   5   0   2    0.07    0.06
   5   0   2    0.11    0.13
  -4   0  -2    8.87    0.43
  -4   0  -2    8.07    0.42
  -4   0  -2    8.38    0.46
  -4   0  -2    8.03    0.42
  -4   0  -2    8.39    0.43
   4   0   2    8.29    0.59
   4   0   2    7.45    0.68
   4   0   2    8.80    0.42
   4   0   2    8.30    0.42
   4   0   2    8.09    0.43
  -3   0  -2    0.01    0.05
  -3   0  -2    0.03    0.04
  -3   0  -2    0.06    0.07
  -3   0  -2    0.03    0.05
  -3   0  -2   -0.05    0.12
   3   0   2   -0.02    0.05
   3   0   2    0.00    0.08
   3   0   2    0.00    0.08
   3   0   2    0.02    0.04
  -2   0  -2  779.68   30.99
  -2   0  -2  727.35   30.95
  -2   0  -2  809.39   31.07
  -2   0  -2  765.17   31.05
  -2   0  -2  744.63   30.98
   2   0   2  795.78   31.13
   2   0   2  821.66   31.19
   2   0   2  806.11   31.03
   1   0   2    0.16    0.04
   1   0   2    0.35    0.10
   1   0   2    0.29    0.05
   0   0  -2  231.54    9.27
   0   0  -2  234.04    9.34
   0   0  -2  233.59    9.46
   0   0   2  235.47    9.42
   0   0   2  240.71    9.30
   0   0   2  227.59    9.40
   1   0  -2    0.00    0.02
   1   0  -2    0.02    0.02
  -1   0   2    0.05    0.02
   2   0  -2  560.44   21.52
   2   0  -2  551.09   21.46
   2   0  -2  529.57   21.40
  -2   0   2  550.26   21.43
  -2   0   2  500.10   21.35
   3   0  -2    0.02    0.07
   3   0  -2   -0.01    0.04
   3   0  -2    0.40    0.07
   3   0  -2    0.01    0.04
   3   0  -2    0.01    0.05
   3   0  -2    0.28    0.14
  -3   0   2    0.05    0.05
  -3   0   2    0.12    0.03
  -3   0   2    0.00    0.04
  -3   0   2    0.01    0.04
  -3   0   2    0.06    0.06
   4   0  -2  340.78   14.10
   4   0  -2  347.65   14.17
   4   0  -2  340.44   14.29
   4   0  -2  358.45   14.12
   4   0  -2  357.75   14.13
   4   0  -2  363.59   14.15
  -4   0   2  364.14   14.10
  -4   0   2  347.12   14.15
  -4   0   2  370.52   14.16
  -4   0   2  365.33   14.17
  -4   0   2  349.38   14.12
  -4   0   2  349.09   14.08
   5   0  -2   -0.04    0.10
   5   0  -2    0.02    0.07
   5   0  -2    0.11    0.07
   5   0  -2    0.05    0.08
   5   0  -2    0.14    0.07
   5   0  -2   -0.05    0.07
   5   0  -2    0.03    0.06
   5   0  -2   -0.04    0.07
   5   0  -2    0.03    0.08
   5   0  -2   -0.04    0.06
   5   0  -2    0.00    0.06
   5   0  -2    0.10    0.08
   5   0  -2    0.00    0.07
  -5   0   2   -0.07    0.06
  -5   0   2    0.11    0.08
  -5   0   2    0.01    0.06
  -5   0   2   -0.05    0.08
  -5   0   2    0.00    0.09
  -5   0   2    0.02    0.10
   6   0  -2    4.30    0.25
   6   0  -2    4.72    0.24
   6   0  -2    4.23    0.27
   6   0  -2    4.62    0.25
   6   0  -2    4.32    0.26
   6   0  -2    5.10    0.27
   6   0  -2    4.39    0.27
   6   0  -2    4.92    0.27
   6   0  -2    5.06    0.29
  -6   0   2    4.62    0.26
  -6   0   2    4.42    0.33
  -6   0   2    4.68    0.26
  -6   0   2    4.66    0.30
  -6   0   2    4.48    0.34
  -6   0  -3    0.02    0.04
  -6   0  -3    0.01    0.09
   6   0   3   -0.02    0.04
   6   0   3   -0.02    0.04
   6   0   3   -0.04    0.07
  -5   0  -3  120.49    4.63
  -5   0  -3  111.84    4.56
  -5   0  -3  112.51    4.59
  -5   0  -3  111.91    4.53
   5   0   3  112.41    4.56
   5   0   3  113.12    4.56
   5   0   3  112.00    4.55
   5   0   3  123.45    4.63
   5   0   3  107.82    4.57
   5   0   3  106.04    4.53
  -4   0  -3    0.18    0.08
  -4   0  -3    0.02    0.07
  -4   0  -3    0.01    0.07
   4   0   3    0.06    0.06
   4   0   3   -0.08    0.10
   4   0   3   -0.04    0.13
  -3   0  -3   50.20    2.01
  -3   0  -3   51.12    2.05
  -3   0  -3   49.00    2.01
   3   0   3   51.79    2.20
   3   0   3   46.82    2.35
   3   0   3   48.82    2.01
   3   0   3   43.75    2.08
  -2   0  -3    0.01    0.07
  -2   0  -3    0.13    0.05
  -2   0  -3    0.00    0.05
   2   0   3   -0.01    0.07
   2   0   3    0.00    0.03
   2   0   3    0.18    0.09
   2   0   3    0.00    0.04
   2   0   3   -0.01    0.11
  -1   0  -3   62.20    2.58
  -1   0  -3   61.72    2.59
  -1   0  -3   65.42    2.61
   1   0   3   66.01    2.61
   1   0   3   71.54    2.76
   1   0   3   59.00    2.59
   1   0  -3  373.72   14.22
   1   0  -3  350.38   14.12
   1   0  -3  346.20   14.16
  -1   0   3  353.21   14.19
   2   0  -3    0.13    0.06
   2   0  -3    0.12    0.04
   2   0  -3    0.00    0.03
  -2   0   3    0.02    0.03
  -2   0   3    0.01    0.03
   3   0  -3    0.00    0.04
   3   0  -3    0.09    0.07
   3   0  -3    0.05    0.05
   3   0  -3    0.08    0.04
   3   0  -3    0.06    0.06
   3   0  -3    0.04    0.07
   3   0  -3    0.21    0.07
  -3   0   3    0.14    0.06
  -3   0   3    0.20    0.04
  -3   0   3    0.03    0.04
  -3   0   3    0.05    0.06
  -3   0   3    0.04    0.04
  -3   0   3    0.08    0.05
   4   0  -3    0.02    0.07
   4   0  -3   -0.02    0.06
   4   0  -3    0.01    0.06
   4   0  -3   -0.15    0.06
   4   0  -3    0.00    0.07
   4   0  -3    0.20    0.09
   4   0  -3   -0.02    0.05
  -4   0   3    0.02    0.06
  -4   0   3    0.04    0.05
  -4   0   3    0.17    0.08
  -4   0   3    0.10    0.07
  -4   0   3    0.04    0.08
   5   0  -3    2.00    0.17
   5   0  -3    2.64    0.20
   5   0  -3    2.18    0.18
   5   0  -3    2.60    0.19
   5   0  -3    2.19    0.19
   5   0  -3    2.20    0.17
   5   0  -3    2.11    0.16
   5   0  -3    2.30    0.20
   5   0  -3    2.29    0.20
   5   0  -3    2.59    0.20
   5   0  -3    2.31    0.22
  -5   0   3    2.72    0.21
  -5   0   3    2.34    0.18
  -5   0   3    2.45    0.21
  -5   0   3    2.65    0.24
  -5   0   3    2.57    0.20
  -5   0   3    2.00    0.23
  -5   0   3    2.18    0.19
   6   0  -3    0.26    0.08
   6   0  -3   -0.03    0.05
   6   0  -3   -0.04    0.09
   6   0  -3   -0.14    0.07
   6   0  -3    0.09    0.06
   6   0  -3   -0.03    0.05
   6   0  -3    0.04    0.05
   6   0  -3   -0.03    0.06
   6   0  -3    0.07    0.07
  -6   0   3   -0.01    0.06
  -6   0   3    0.05    0.14
  -6   0   3    0.23    0.11
  -6   0   3    0.19    0.16
  -6   0   3    0.03    0.06
  -5   0  -4   -0.02    0.07
  -5   0  -4   -0.02    0.07
  -5   0  -4   -0.05    0.06
   5   0   4   -0.01    0.05
   5   0   4    0.06    0.06
   5   0   4    0.05    0.09
   5   0   4    0.04    0.07
  -4   0  -4   14.78    0.68
  -4   0  -4   14.32    0.65
  -4   0  -4   12.47    0.61
  -4   0  -4   14.55    0.70
  -4   0  -4   13.56    0.64
   4   0   4   12.65    0.61
   4   0   4   14.81    0.70
   4   0   4   13.68    0.63
   4   0   4   13.62    0.63
   4   0   4   14.59    0.67
  -3   0  -4    0.07    0.06
  -3   0  -4    0.02    0.04
  -3   0  -4    0.09    0.08
   3   0   4   -0.01    0.11
  -2   0  -4    3.51    0.22
  -2   0  -4    3.53    0.21
  -2   0  -4    3.72    0.23
   2   0   4    3.90    0.28
   2   0   4    3.56    0.25
   2   0   4    3.65    0.38
  -1   0  -4    0.01    0.06
  -1   0  -4    0.02    0.03
   1   0   4   -0.03    0.04
   1   0   4    0.01    0.04
   1   0   4    0.01    0.07
   1   0   4    0.01    0.08
   0   0  -4    6.56    0.33
   0   0  -4    6.63    0.33
   0   0   4    7.27    0.34
   0   0   4    7.11    0.35
   0   0   4    7.16    0.33
   0   0   4    7.30    0.42
   1   0  -4    0.11    0.04
   1   0  -4    0.08    0.04
   1   0  -4    0.10    0.05
  -1   0   4   -0.01    0.04
  -1   0   4   -0.01    0.03
   2   0  -4  170.49    6.77
   2   0  -4  163.96    6.77
   2   0  -4  164.95    6.83
   2   0  -4  167.87    6.79
   2   0  -4  173.86    6.76
   2   0  -4  171.39    6.77
   2   0  -4  175.95    6.79
   2   0  -4  169.56    6.77
  -2   0   4  168.38    6.80
  -2   0   4  171.50    6.78
   3   0  -4   -0.01    0.06
   3   0  -4    0.05    0.04
   3   0  -4    0.02    0.04
   3   0  -4    0.01    0.04
   3   0  -4    0.00    0.06
   3   0  -4    0.01    0.06
   3   0  -4    0.10    0.06
  -3   0   4    0.26    0.06
  -3   0   4    0.03    0.04
  -3   0   4    0.05    0.04
  -3   0   4    0.05    0.05
  -3   0   4    0.01    0.05
  -3   0   4   -0.02    0.05
   4   0  -4    6.12    0.34
   4   0  -4    5.76    0.31
   4   0  -4    5.71    0.31
   4   0  -4    6.16    0.34
   4   0  -4    5.84    0.32
   4   0  -4    4.73    0.35
   4   0  -4    5.77    0.31
  -4   0   4    6.06    0.35
  -4   0   4    5.06    0.28
  -4   0   4    5.56    0.30
  -4   0   4    5.95    0.35
  -4   0   4    5.62    0.34
  -4   0   4    5.96    0.33
   5   0  -4    0.02    0.07
   5   0  -4   -0.01    0.07
   5   0  -4   -0.08    0.06
   5   0  -4    0.05    0.06
   5   0  -4    0.11    0.07
   5   0  -4    0.12    0.08
   5   0  -4    0.02    0.06
   5   0  -4    0.02    0.06
   5   0  -4    0.11    0.08
   5   0  -4    0.02    0.07
   5   0  -4    0.08    0.09
   5   0  -4    0.06    0.07
  -5   0   4    0.02    0.08
  -5   0   4    0.01    0.07
  -5   0   4    0.04    0.10
  -5   0   4    0.06    0.10
  -5   0   4    0.00    0.08
  -5   0   4    0.03    0.10
   6   0  -4   19.52    0.86
   6   0  -4   20.13    0.85
   6   0  -4   20.05    0.89
   6   0  -4   19.60    0.88
   6   0  -4   20.08    0.90
   6   0  -4   20.38    0.86
   6   0  -4   20.35    0.86
   6   0  -4   20.38    0.87
  -6   0   4   19.34    0.86
  -6   0   4   20.57    0.90
  -6   0   4   21.25    0.90
  -6   0   4   19.41    0.91
  -5   0  -5    0.16    0.07
  -5   0  -5    0.23    0.07
  -5   0  -5    0.08    0.08
   5   0   5    0.15    0.12
   5   0   5    0.37    0.07
   5   0   5    0.13    0.07
  -4   0  -5    0.01    0.08
  -4   0  -5   -0.01    0.07
  -4   0  -5    0.04    0.07
  -4   0  -5    0.03    0.07
   4   0   5    0.02    0.06
   4   0   5    0.01    0.06
   4   0   5   -0.02    0.08
   4   0   5    0.14    0.06
   4   0   5   -0.05    0.07
  -3   0  -5   45.38    1.78
  -3   0  -5   43.58    1.81
  -3   0  -5   44.32    1.77
   3   0   5   42.35    1.76
   3   0   5   35.53    2.13
  -2   0  -5    0.07    0.07
  -2   0  -5    0.04    0.06
  -2   0  -5    0.07    0.06
   2   0   5    0.03    0.10
   2   0   5    0.03    0.06
  -1   0  -5  149.70    6.04
  -1   0  -5  148.67    6.06
  -1   0  -5  153.15    6.04
   1   0   5  157.28    6.13
   1   0   5  145.09    6.08
   1   0   5  156.53    6.31
   1   0   5  147.81    6.06
   0   0  -5    0.03    0.04
   0   0  -5   -0.01    0.06
   0   0  -5    0.02    0.04
   0   0  -5    0.03    0.03
   0   0  -5    0.09    0.04
   0   0  -5   -0.03    0.05
   0   0   5    0.00    0.07
   0   0   5    0.03    0.05
   0   0   5   -0.01    0.08
   0   0   5    0.09    0.04
   1   0  -5    6.61    0.29
   1   0  -5    5.75    0.30
   1   0  -5    5.68    0.28
   1   0  -5    5.93    0.30
   1   0  -5    5.76    0.32
   1   0  -5    6.09    0.29
  -1   0   5    5.48    0.31
  -1   0   5    6.28    0.33
  -1   0   5    6.79    0.32
  -1   0   5    6.73    0.32
  -1   0   5    5.38    0.34
   2   0  -5    0.05    0.04
   2   0  -5    0.04    0.04
   2   0  -5    0.03    0.05
   2   0  -5    0.06    0.04
   2   0  -5   -0.01    0.03
   2   0  -5   -0.01    0.07
   2   0  -5    0.00    0.04
  -2   0   5    0.01    0.05
  -2   0   5    0.04    0.04
  -2   0   5    0.07    0.05
  -2   0   5    0.03    0.04
  -2   0   5   -0.01    0.04
   3   0  -5  165.46    6.72
   3   0  -5  156.17    6.76
   3   0  -5  171.87    6.75
   3   0  -5  173.22    6.76
   3   0  -5  173.72    6.73
   3   0  -5  168.52    6.73
   3   0  -5  173.32    6.74
   3   0  -5  169.31    6.73
  -3   0   5  172.26    6.75
  -3   0   5  153.05    6.71
  -3   0   5  176.29    6.76
  -3   0   5  169.40    6.72
  -3   0   5  170.92    6.73
  -3   0   5  162.52    6.73
   4   0  -5    0.08    0.07
   4   0  -5    0.09    0.07
   4   0  -5    0.01    0.05
   4   0  -5   -0.05    0.06
   4   0  -5   -0.01    0.06
   4   0  -5    0.04    0.06
   4   0  -5    0.06    0.06
  -4   0   5    0.00    0.06
  -4   0   5    0.01    0.05
  -4   0   5    0.07    0.06
  -4   0   5   -0.05    0.06
  -4   0   5    0.07    0.07
  -4   0   5   -0.02    0.07
  -4   0   5    0.02    0.05
  -4   0   5    0.01    0.07
   5   0  -5   94.03    3.95
   5   0  -5   99.15    3.99
   5   0  -5   97.44    3.97
   5   0  -5   98.59    3.93
   5   0  -5   96.30    4.01
   5   0  -5   97.27    3.92
   5   0  -5   96.47    4.00
   5   0  -5   91.97    3.93
   5   0  -5   91.32    3.93
   5   0  -5   95.86    3.96
   5   0  -5  102.10    3.96
   5   0  -5  101.62    3.96
  -5   0   5   97.29    3.96
  -5   0   5  101.00    3.96
  -5   0   5   94.05    4.01
  -5   0   5   98.50    3.97
  -5   0   5  100.21    3.98
  -5   0   5  101.22    3.95
   6   0  -5   -0.02    0.10
   6   0  -5   -0.04    0.05
   6   0  -5   -0.03    0.06
   6   0  -5    0.01    0.08
   6   0  -5   -0.02    0.05
   6   0  -5   -0.02    0.06
   6   0  -5    0.01    0.05
   6   0  -5    0.02    0.06
  -6   0   5    0.00    0.07
  -6   0   5    0.04    0.08
  -5   0  -6   -0.11    0.09
  -5   0  -6   -0.04    0.04
   5   0   6   -0.01    0.06
  -4   0  -6   35.43    1.45
  -4   0  -6   34.70    1.55
  -4   0  -6   35.39    1.47
   4   0   6   32.09    1.43
   4   0   6   35.06    1.43
   4   0   6   32.33    1.48
   4   0   6   34.23    1.41
  -3   0  -6    0.01    0.06
  -3   0  -6   -0.03    0.07
  -3   0  -6   -0.03    0.07
  -3   0  -6   -0.04    0.06
   3   0   6   -0.04    0.07
   3   0   6    0.02    0.07
   3   0   6    0.05    0.06
   3   0   6   -0.03    0.08
  -2   0  -6    0.14    0.14
  -2   0  -6    0.14    0.06
  -2   0  -6    0.15    0.08
   2   0   6    0.10    0.07
   2   0   6    0.19    0.16
   2   0   6    0.26    0.11
  -1   0  -6    0.05    0.05
  -1   0  -6    0.06    0.05
  -1   0  -6    0.01    0.07
   1   0   6    0.01    0.08
   1   0   6    0.25    0.12
   0   0  -6    3.73    0.22
   0   0  -6    2.78    0.17
   0   0  -6    2.95    0.19
   0   0  -6    2.92    0.19
   0   0  -6    3.15    0.20
   0   0   6    2.91    0.23
   0   0   6    3.74    0.23
   0   0   6    2.61    0.22
   0   0   6    2.48    0.18
   0   0   6    3.06    0.24
   0   0   6    3.06    0.22
   1   0  -6    0.03    0.06
   1   0  -6    0.02    0.04
   1   0  -6    0.20    0.06
   1   0  -6    0.00    0.07
   1   0  -6    0.13    0.04
   1   0  -6    0.02    0.04
  -1   0   6    0.04    0.04
  -1   0   6    0.02    0.05
  -1   0   6    0.18    0.07
  -1   0   6    0.08    0.06
   2   0  -6   78.37    3.18
   2   0  -6   79.33    3.17
   2   0  -6   78.56    3.18
   2   0  -6   81.20    3.19
   2   0  -6   78.66    3.20
  -2   0   6   74.85    3.17
  -2   0   6   77.36    3.24
  -2   0   6   81.87    3.22
  -2   0   6   75.95    3.20
  -2   0   6   79.41    3.21
  -2   0   6   78.84    3.18
   3   0  -6    0.04    0.06
   3   0  -6    0.02    0.06
   3   0  -6    0.06    0.05
   3   0  -6    0.09    0.06
   3   0  -6    0.01    0.05
   3   0  -6    0.30    0.08
   3   0  -6   -0.01    0.06
  -3   0   6    0.01    0.06
  -3   0   6    0.09    0.06
  -3   0   6    0.05    0.07
  -3   0   6    0.01    0.06
  -3   0   6    0.01    0.05
   4   0  -6   44.72    1.90
   4   0  -6   46.52    1.88
   4   0  -6   44.77    1.87
   4   0  -6   44.12    1.87
   4   0  -6   45.70    1.91
   4   0  -6   44.36    1.88
   4   0  -6   46.71    1.89
  -4   0   6   45.99    1.89
  -4   0   6   44.68    1.92
  -4   0   6   44.65    1.87
  -4   0   6   44.91    1.91
  -4   0   6   46.79    1.88
  -4   0   6   38.84    1.87
  -4   0   6   46.62    1.93
  -4   0   6   44.15    1.88
  -4   0   6   45.60    1.86
   5   0  -6    0.06    0.12
   5   0  -6    0.06    0.06
   5   0  -6    0.00    0.06
   5   0  -6   -0.01    0.07
   5   0  -6    0.05    0.06
   5   0  -6   -0.08    0.08
   5   0  -6    0.06    0.07
   5   0  -6    0.03    0.07
   5   0  -6    0.14    0.07
   5   0  -6    0.06    0.07
   5   0  -6    0.05    0.07
  -5   0   6    0.06    0.09
  -5   0   6    0.07    0.09
  -5   0   6    0.09    0.10
  -5   0   6   -0.07    0.10
  -5   0   6    0.01    0.13
   6   0  -6   41.51    1.82
   6   0  -6   42.78    1.76
   6   0  -6   46.30    1.77
   6   0  -6   42.06    1.81
   6   0  -6   42.51    1.79
   6   0  -6   43.51    1.78
   6   0  -6   44.61    1.77
  -6   0   6   44.25    1.81
  -6   0   6   43.04    1.78
  -4   0  -7    0.01    0.08
  -4   0  -7   -0.05    0.06
  -4   0  -7   -0.04    0.11
   4   0   7    0.04    0.05
  -3   0  -7    1.01    0.12
  -3   0  -7    0.85    0.13
  -3   0  -7    0.80    0.12
  -3   0  -7    0.75    0.11
   3   0   7    0.85    0.12
   3   0   7    0.74    0.10
   3   0   7    0.66    0.11
  -2   0  -7    0.01    0.06
  -2   0  -7   -0.04    0.08
   2   0   7    0.07    0.06
   2   0   7    0.04    0.11
  -1   0  -7    0.08    0.07
  -1   0  -7    0.19    0.08
  -1   0  -7    0.15    0.07
   1   0   7    0.56    0.11
   1   0   7    0.66    0.15
   0   0  -7    0.08    0.06
   0   0  -7    0.03    0.05
   0   0  -7    0.03    0.07
   0   0   7    0.00    0.07
   0   0   7   -0.01    0.07
   0   0   7    0.06    0.07
   0   0   7    0.05    0.06
   1   0  -7   13.33    0.59
   1   0  -7   13.10    0.60
   1   0  -7   12.62    0.59
   1   0  -7   13.28    0.63
   1   0  -7   13.09    0.60
  -1   0   7   13.57    0.62
  -1   0   7   12.85    0.60
  -1   0   7   13.71    0.68
  -1   0   7   12.34    0.66
  -1   0   7   13.54    0.64
  -1   0   7   12.93    0.64
  -1   0   7   13.85    0.64
   2   0  -7    0.09    0.06
   2   0  -7    0.10    0.06
   2   0  -7    0.03    0.05
   2   0  -7   -0.03    0.05
   2   0  -7    0.00    0.06
  -2   0   7   -0.02    0.05
  -2   0   7   -0.01    0.05
  -2   0   7    0.07    0.07
  -2   0   7    0.04    0.07
  -2   0   7    0.00    0.06
  -2   0   7    0.10    0.06
  -2   0   7    0.05    0.07
   3   0  -7  364.80   14.71
   3   0  -7  378.66   14.70
   3   0  -7  359.70   14.73
   3   0  -7  369.40   14.71
   3   0  -7  378.32   14.72
   3   0  -7  374.10   14.71
  -3   0   7  324.29   14.72
  -3   0   7  374.71   14.75
  -3   0   7  380.97   14.72
  -3   0   7  366.98   14.72
  -3   0   7  390.77   14.75
  -3   0   7  370.41   14.71
   4   0  -7   -0.13    0.06
   4   0  -7    0.09    0.08
   4   0  -7    0.03    0.07
   4   0  -7    0.02    0.06
   4   0  -7    0.06    0.08
   4   0  -7    0.10    0.09
   4   0  -7    0.02    0.08
   4   0  -7   -0.03    0.06
   4   0  -7    0.05    0.08
   4   0  -7   -0.01    0.06
   4   0  -7    0.06    0.08
   4   0  -7    0.23    0.08
   4   0  -7    0.07    0.07
  -4   0   7    0.07    0.06
  -4   0   7   -0.01    0.08
  -4   0   7    0.07    0.08
  -4   0   7    0.03    0.07
  -4   0   7   -0.03    0.09
  -4   0   7    0.05    0.07
  -4   0   7    0.03    0.08
  -4   0   7    0.13    0.09
   5   0  -7   12.46    0.59
   5   0  -7   11.84    0.59
   5   0  -7   11.10    0.59
   5   0  -7   13.07    0.58
   5   0  -7   11.93    0.56
   5   0  -7   12.68    0.62
   5   0  -7   11.60    0.54
   5   0  -7   12.17    0.54
   5   0  -7   11.72    0.55
  -5   0   7   11.23    0.62
  -5   0   7   12.52    0.59
  -5   0   7   11.92    0.57
  -5   0   7   12.17    0.59
   6   0  -7    0.04    0.05
   6   0  -7    0.03    0.05
   6   0  -7    0.01    0.05
   6   0  -7   -0.01    0.07
   6   0  -7    0.02    0.05
   6   0  -7   -0.03    0.06
   6   0  -7    0.06    0.08
  -6   0   7    0.08    0.15
  -4   0  -8    0.54    0.10
  -4   0  -8    0.60    0.07
   4   0   8    0.50    0.08
  -3   0  -8    0.02    0.06
  -3   0  -8    0.02    0.13
  -3   0  -8   -0.01    0.05
   3   0   8    0.08    0.09
   3   0   8    0.04    0.06
   3   0   8   -0.01    0.06
  -2   0  -8  169.89    7.18
  -2   0  -8  178.67    7.14
  -2   0  -8  183.67    7.15
   2   0   8  181.10    7.14
   2   0   8  172.62    7.12
   2   0   8  184.61    7.31
   2   0   8  176.70    7.13
  -1   0  -8    0.01    0.06
  -1   0  -8    0.15    0.08
  -1   0  -8    0.03    0.06
   1   0   8    0.00    0.11
   1   0   8    0.08    0.11
   1   0   8    0.03    0.06
   0   0  -8   73.52    3.04
   0   0  -8   70.20    3.00
   0   0  -8   76.39    3.01
   0   0  -8   71.07    3.00
   0   0   8   74.15    3.14
   0   0   8   79.38    3.08
   0   0   8   71.51    3.04
   1   0  -8    0.00    0.06
   1   0  -8    0.08    0.06
   1   0  -8    0.05    0.06
   1   0  -8    0.04    0.06
   1   0  -8    0.03    0.07
   1   0  -8   -0.02    0.05
  -1   0   8    0.01    0.07
  -1   0   8    0.01    0.07
  -1   0   8   -0.03    0.06
  -1   0   8    0.03    0.07
  -1   0   8    0.20    0.11
  -1   0   8   -0.08    0.09
  -1   0   8    0.00    0.06
   2   0  -8    6.85    0.36
   2   0  -8    6.64    0.37
   2   0  -8    6.32    0.36
   2   0  -8    6.44    0.35
   2   0  -8    6.64    0.38
   2   0  -8    6.66    0.36
  -2   0   8    6.31    0.40
  -2   0   8    7.18    0.37
  -2   0   8    7.39    0.41
  -2   0   8    6.69    0.40
  -2   0   8    7.01    0.37
  -2   0   8    6.91    0.38
  -2   0   8    6.98    0.41
   3   0  -8    0.06    0.07
   3   0  -8   -0.04    0.07
   3   0  -8    0.01    0.06
   3   0  -8   -0.02    0.06
   3   0  -8   -0.07    0.07
   3   0  -8    0.04    0.08
  -3   0   8    0.03    0.07
  -3   0   8    0.05    0.09
  -3   0   8    0.07    0.08
  -3   0   8   -0.03    0.06
  -3   0   8   -0.05    0.07
  -3   0   8   -0.06    0.06
   4   0  -8   19.54    0.90
   4   0  -8   17.73    0.84
   4   0  -8   20.85    0.88
   4   0  -8   19.74    0.87
   4   0  -8   19.31    0.85
   4   0  -8   19.08    0.83
   4   0  -8   18.56    0.84
   4   0  -8   18.55    0.85
   4   0  -8   18.29    0.84
   4   0  -8   18.96    0.81
  -4   0   8   18.45    0.87
  -4   0   8   19.19    0.86
  -4   0   8   16.24    0.87
  -4   0   8   19.15    0.85
  -4   0   8   19.28    0.85
  -4   0   8   18.61    0.87
   5   0  -8   -0.06    0.07
   5   0  -8   -0.03    0.04
   5   0  -8    0.03    0.06
   5   0  -8    0.11    0.06
   5   0  -8    0.05    0.07
   5   0  -8    0.13    0.06
   5   0  -8    0.03    0.06
  -5   0   8    0.01    0.08
  -5   0   8    0.11    0.09
  -5   0   8   -0.08    0.13
   6   0  -8    3.98    0.20
   6   0  -8    3.62    0.23
   6   0  -8    3.30    0.26
   6   0  -8    3.65    0.18
   6   0  -8    3.26    0.20
   6   0  -8    3.88    0.21
  -6   0   8    3.65    0.20
  -3   0  -9    8.17    0.36
  -3   0  -9    6.37    0.37
   3   0   9    8.14    0.37
  -2   0  -9    0.06    0.07
  -2   0  -9    0.27    0.07
   2   0   9    0.01    0.09
   2   0   9    0.05    0.06
   2   0   9    0.09    0.07
  -1   0  -9   24.72    1.08
  -1   0  -9   26.68    1.10
  -1   0  -9   26.40    1.11
  -1   0  -9   25.95    1.09
  -1   0  -9   24.79    1.09
   1   0   9   25.92    1.10
   1   0   9   25.36    1.09
   1   0   9   24.41    1.24
   1   0   9   24.26    1.08
   0   0  -9    0.11    0.08
   0   0  -9    0.15    0.07
   0   0  -9   -0.06    0.07
   0   0  -9    0.01    0.08
   0   0  -9    0.01    0.09
   0   0  -9    0.04    0.07
   0   0   9    0.02    0.09
   0   0   9    0.08    0.09
   0   0   9    0.04    0.08
   0   0   9   -0.02    0.09
   0   0   9    0.00    0.06
   1   0  -9    0.52    0.14
   1   0  -9    0.46    0.14
   1   0  -9    0.32    0.09
   1   0  -9    0.13    0.08
   1   0  -9    0.51    0.10
   1   0  -9    0.77    0.14
  -1   0   9    0.29    0.10
  -1   0   9    0.19    0.14
  -1   0   9    0.40    0.12
  -1   0   9    0.31    0.12
   2   0  -9    0.00    0.07
   2   0  -9    0.02    0.08
   2   0  -9   -0.01    0.06
   2   0  -9    0.06    0.08
   2   0  -9    0.01    0.09
   2   0  -9    0.04    0.08
   2   0  -9   -0.02    0.08
   2   0  -9   -0.02    0.06
   2   0  -9   -0.10    0.09
   2   0  -9    0.03    0.09
   2   0  -9    0.02    0.07
   2   0  -9    0.06    0.06
  -2   0   9    0.02    0.12
  -2   0   9   -0.08    0.08
  -2   0   9    0.02    0.09
  -2   0   9   -0.05    0.07
  -2   0   9    0.03    0.12
  -2   0   9    0.00    0.09
  -2   0   9   -0.05    0.09
  -2   0   9    0.01    0.10
   3   0  -9    1.13    0.14
   3   0  -9    1.21    0.17
   3   0  -9    1.11    0.17
   3   0  -9    1.58    0.17
   3   0  -9    1.11    0.13
   3   0  -9    0.99    0.16
   3   0  -9    1.26    0.16
   3   0  -9    1.19    0.14
   3   0  -9    1.11    0.15
   3   0  -9    1.13    0.15
   3   0  -9    1.23    0.14
   3   0  -9    1.36    0.13
  -3   0   9    1.14    0.19
  -3   0   9    0.90    0.25
  -3   0   9    1.11    0.14
  -3   0   9    1.09    0.17
  -3   0   9    1.24    0.17
  -3   0   9    1.33    0.19
   4   0  -9   -0.03    0.06
   4   0  -9    0.07    0.07
   4   0  -9   -0.15    0.07
   4   0  -9   -0.04    0.06
   4   0  -9    0.07    0.07
   4   0  -9   -0.03    0.07
   4   0  -9    0.01    0.07
   4   0  -9    0.02    0.06
  -4   0   9    0.09    0.10
  -4   0   9   -0.01    0.13
  -4   0   9    0.01    0.09
  -4   0   9    0.05    0.20
   5   0  -9   21.99    0.92
   5   0  -9   22.46    0.93
   5   0  -9   21.90    0.94
   5   0  -9   22.27    0.99
   5   0  -9   21.82    0.96
   5   0  -9   22.44    0.95
   5   0  -9   21.89    0.96
  -5   0   9   21.71    0.95
  -5   0   9   23.13    0.98
  -2   0 -10   82.24    3.31
  -2   0 -10   81.00    3.32
   2   0  10   83.39    3.33
   2   0  10   83.33    3.31
  -1   0 -10    0.01    0.05
  -1   0 -10    0.03    0.06
  -1   0 -10    0.09    0.06
   1   0  10   -0.05    0.12
   1   0  10    0.04    0.06
   1   0  10    0.02    0.06
   0   0 -10    0.18    0.06
   0   0 -10    0.10    0.07
   0   0 -10    0.04    0.07
   0   0 -10    0.12    0.07
   0   0 -10    0.05    0.09
   0   0  10   -0.02    0.07
   0   0  10    0.10    0.09
   0   0  10    0.04    0.07
   0   0  10    0.13    0.08
   1   0 -10    0.06    0.07
   1   0 -10   -0.05    0.08
   1   0 -10    0.01    0.06
   1   0 -10    0.01    0.08
   1   0 -10    0.02    0.07
   1   0 -10   -0.03    0.06
   1   0 -10   -0.06    0.07
   1   0 -10   -0.10    0.06
  -1   0  10    0.01    0.09
  -1   0  10    0.07    0.09
  -1   0  10   -0.11    0.07
  -1   0  10    0.04    0.09
   2   0 -10  121.34    4.83
   2   0 -10  119.69    4.80
   2   0 -10  116.13    4.78
   2   0 -10  113.37    4.77
   2   0 -10  120.46    4.77
   2   0 -10  123.93    4.80
   2   0 -10  116.37    4.79
  -2   0  10  113.17    4.79
  -2   0  10  114.45    4.79
  -2   0  10  124.12    4.83
   3   0 -10   -0.14    0.07
   3   0 -10    0.00    0.07
   3   0 -10    0.02    0.07
   3   0 -10    0.00    0.07
   3   0 -10    0.07    0.06
   3   0 -10    0.03    0.07
   3   0 -10    0.09    0.08
   3   0 -10    0.01    0.06
  -3   0  10    0.01    0.09
  -3   0  10    0.01    0.37
  -3   0  10    0.06    0.15
  -3   0  10    0.19    0.13
   4   0 -10    5.12    0.30
   4   0 -10    5.18    0.28
   4   0 -10    4.91    0.31
   4   0 -10    5.31    0.27
   4   0 -10    5.18    0.28
   4   0 -10    4.96    0.29
   4   0 -10    5.27    0.28
   4   0 -10    5.17    0.31
  -4   0  10    5.33    0.27
  -4   0  10    5.25    0.35
  -4   0  10    5.19    0.29
   5   0 -10   -0.03    0.04
   5   0 -10   -0.02    0.09
   5   0 -10   -0.01    0.03
   5   0 -10   -0.02    0.08
   5   0 -10   -0.03    0.05
   5   0 -10    0.00    0.04
  -5   0  10    0.00    0.04
  -5   0  10    0.00    0.05
  -1   0 -11    8.07    0.41
  -1   0 -11    9.13    0.41
   1   0  11    9.35    0.40
   1   0  11    9.11    0.42
   0   0 -11   -0.05    0.06
   0   0 -11    0.04    0.06
   0   0 -11    0.04    0.05
   0   0  11    0.01    0.05
   0   0  11   -0.01    0.06
   1   0 -11    2.22    0.19
   1   0 -11    2.12    0.17
   1   0 -11    2.33    0.18
   1   0 -11    2.36    0.16
   1   0 -11    2.28    0.16
   1   0 -11    2.36    0.20
  -1   0  11    2.43    0.18
  -1   0  11    2.43    0.20
  -1   0  11    2.09    0.17
  -1   0  11    2.44    0.18
   2   0 -11   -0.06    0.06
   2   0 -11    0.03    0.05
   2   0 -11    0.03    0.07
   2   0 -11    0.03    0.08
   2   0 -11   -0.07    0.06
   2   0 -11    0.00    0.05
   2   0 -11    0.04    0.06
  -2   0  11   -0.01    0.15
  -2   0  11    0.04    0.06
  -2   0  11   -0.04    0.07
   3   0 -11   -0.04    0.06
   3   0 -11   -0.02    0.06
   3   0 -11   -0.06    0.07
   3   0 -11   -0.05    0.06
   3   0 -11   -0.04    0.08
   3   0 -11   -0.03    0.04
   3   0 -11    0.04    0.06
   3   0 -11   -0.04    0.06
  -3   0  11   -0.03    0.08
  -3   0  11    0.06    0.15
  -3   0  11    0.02    0.06
   4   0 -11    0.05    0.05
   4   0 -11   -0.09    0.08
   4   0 -11   -0.04    0.04
   4   0 -11    0.01    0.06
   4   0 -11    0.01    0.04
   4   0 -11    0.08    0.06
  -4   0  11    0.00    0.05
   0   0 -12    6.16    0.34
   0   0 -12    7.29    0.33
   0   0  12    7.02    0.34
   0   0  12    7.38    0.32
   1   0 -12   -0.01    0.04
   1   0 -12    0.00    0.05
   1   0 -12    0.05    0.07
  -1   0  12    0.06    0.04
  -1   0  12    0.01    0.07
   2   0 -12    5.40    0.28
   2   0 -12    5.48    0.27
   2   0 -12    5.67    0.27
   2   0 -12    4.98    0.27
  -2   0  12    5.66    0.26
  -2   0  12    5.52    0.29
  -2   0  12    4.91    0.27
   3   0 -12   -0.02    0.04
   3   0 -12    0.02    0.05
   3   0 -12    0.01    0.07
   3   0 -12    0.00    0.04
  -3   0  12    0.01    0.08
  -3   0  12   -0.01    0.04
  -3  -1  12    0.04    0.04
  -3  -1  12    0.05    0.10
   3   1 -12    0.08    0.07
   3   1 -12    0.06    0.04
   3   1 -12    0.04    0.04
  -2  -1  12    0.05    0.08
  -2  -1  12   -0.01    0.05
   2   1 -12    0.05    0.07
   2   1 -12   -0.01    0.06
   2   1 -12   -0.03    0.05
   2   1 -12   -0.02    0.04
  -1  -1  12    8.22    0.35
  -1  -1  12    7.82    0.37
   1   1 -12    7.17    0.35
   1   1 -12    7.73    0.35
   1   1 -12    7.77    0.37
   0  -1  12    1.25    0.09
   0  -1  12    1.15    0.12
   0   1 -12    0.85    0.09
  -4  -1  11    1.47    0.10
  -4  -1  11    1.49    0.16
   4   1 -11    1.37    0.14
   4   1 -11    1.28    0.12
   4   1 -11    1.45    0.12
   4   1 -11    1.35    0.10
   4   1 -11    1.41    0.12
   4   1 -11    1.49    0.11
   4   1 -11    1.21    0.11
  -3  -1  11    2.87    0.18
  -3  -1  11    2.61    0.20
  -3  -1  11    2.84    0.30
   3   1 -11    2.60    0.18
   3   1 -11    2.63    0.20
   3   1 -11    2.78    0.18
   3   1 -11    2.95    0.18
   3   1 -11    2.98    0.19
   3   1 -11    3.04    0.21
  -2  -1  11    2.06    0.17
  -2  -1  11    2.10    0.16
   2   1 -11    2.06    0.15
   2   1 -11    1.78    0.17
   2   1 -11    2.17    0.17
   2   1 -11    1.62    0.17
  -1  -1  11   10.34    0.49
  -1  -1  11    9.87    0.48
  -1  -1  11   10.32    0.48
   1   1 -11   10.27    0.47
   1   1 -11   10.30    0.50
   1   1 -11   10.48    0.49
   1   1 -11   10.57    0.48
   0  -1  11    0.24    0.07
   0  -1  11    0.27    0.08
   0   1 -11    0.28    0.08
   0   1 -11    0.17    0.07
   0   1 -11    0.11    0.06
   1  -1  11    0.27    0.08
   1  -1  11    0.18    0.05
  -1   1 -11    0.08    0.08
  -1   1 -11    0.13    0.05
  -5  -1  10    0.07    0.05
  -5  -1  10    0.11    0.05
   5   1 -10    0.07    0.05
   5   1 -10    0.14    0.09
   5   1 -10    0.08    0.08
   5   1 -10    0.11    0.05
   5   1 -10    0.08    0.04
   5   1 -10    0.11    0.04
  -4  -1  10    3.50    0.30
  -4  -1  10    3.30    0.20
  -4  -1  10    3.28    0.22
   4   1 -10    3.34    0.23
   4   1 -10    3.83    0.24
   4   1 -10    3.13    0.24
   4   1 -10    3.49    0.21
   4   1 -10    3.48    0.20
   4   1 -10    3.12    0.21
   4   1 -10    3.30    0.21
   4   1 -10    3.55    0.21
  -3  -1  10    0.22    0.17
  -3  -1  10    0.20    0.14
  -3  -1  10    0.23    0.08
  -3  -1  10    0.21    0.10
   3   1 -10    0.24    0.09
   3   1 -10    0.15    0.07
   3   1 -10    0.10    0.08
   3   1 -10    0.06    0.08
   3   1 -10    0.18    0.08
   3   1 -10    0.17    0.08
   3   1 -10    0.09    0.06
   3   1 -10    0.25    0.07
   3   1 -10    0.23    0.08
  -2  -1  10    0.75    0.16
  -2  -1  10    0.58    0.13
   2   1 -10    0.89    0.12
   2   1 -10    0.69    0.11
   2   1 -10    0.81    0.13
   2   1 -10    0.86    0.13
   2   1 -10    0.72    0.16
   2   1 -10    0.66    0.12
   2   1 -10    0.52    0.13
  -1  -1  10   -0.01    0.07
  -1  -1  10    0.00    0.08
  -1  -1  10    0.07    0.08
   1   1 -10    0.04    0.07
   1   1 -10    0.03    0.06
   1   1 -10   -0.01    0.08
   1   1 -10    0.04    0.07
   1   1 -10    0.04    0.08
   1   1 -10    0.30    0.11
   1   1 -10    0.09    0.06
   0  -1  10   31.60    1.32
   0  -1  10   30.30    1.33
   0   1 -10   32.75    1.33
   0   1 -10   31.05    1.31
   0   1 -10   30.61    1.33
   0   1 -10   31.44    1.35
   1  -1  10    2.01    0.17
   1  -1  10    2.10    0.16
  -1   1 -10    1.87    0.15
  -1   1 -10    1.98    0.16
  -1   1 -10    2.07    0.17
   2  -1  10   13.10    0.56
   2  -1  10   12.97    0.57
  -2   1 -10   12.56    0.56
  -2   1 -10   12.54    0.57
  -5  -1   9   10.78    0.55
  -5  -1   9   10.34    0.49
   5   1  -9   10.51    0.48
   5   1  -9    9.93    0.50
   5   1  -9   10.41    0.48
   5   1  -9   10.72    0.47
   5   1  -9   10.69    0.46
   5   1  -9   10.58    0.49
   5   1  -9    9.70    0.51
  -4  -1   9    6.44    0.38
  -4  -1   9    6.17    0.36
  -4  -1   9    5.89    0.39
  -4  -1   9    5.77    0.46
   4   1  -9    6.28    0.34
   4   1  -9    6.18    0.33
   4   1  -9    6.57    0.35
   4   1  -9    6.64    0.32
   4   1  -9    6.74    0.38
   4   1  -9    6.66    0.38
   4   1  -9    6.97    0.37
   4   1  -9    6.42    0.37
  -3  -1   9    3.67    0.26
  -3  -1   9    3.68    0.32
  -3  -1   9    3.90    0.29
  -3  -1   9    3.33    0.27
  -3  -1   9    3.45    0.28
  -3  -1   9    3.59    0.25
  -3  -1   9    3.90    0.28
   3   1  -9    3.56    0.22
   3   1  -9    4.19    0.26
   3   1  -9    3.45    0.25
   3   1  -9    4.08    0.28
   3   1  -9    4.18    0.29
   3   1  -9    3.81    0.27
   3   1  -9    3.73    0.24
   3   1  -9    3.52    0.24
   3   1  -9    3.51    0.24
   3   1  -9    3.66    0.24
   3   1  -9    3.58    0.24
   3   1  -9    3.76    0.25
  -2  -1   9    2.65    0.25
  -2  -1   9    2.78    0.24
  -2  -1   9    2.60    0.27
  -2  -1   9    2.40    0.37
  -2  -1   9    2.82    0.21
  -2  -1   9    2.44    0.23
  -2  -1   9    2.96    0.26
   2   1  -9    2.62    0.22
   2   1  -9    2.55    0.20
   2   1  -9    3.16    0.22
   2   1  -9    2.74    0.24
   2   1  -9    2.95    0.23
   2   1  -9    2.98    0.24
   2   1  -9    2.56    0.21
   2   1  -9    2.68    0.20
   2   1  -9    2.25    0.19
   2   1  -9    2.75    0.21
  -1  -1   9    0.05    0.10
  -1  -1   9    0.10    0.10
  -1  -1   9    0.17    0.10
  -1  -1   9   -0.03    0.10
   1   1  -9    0.06    0.07
   1   1  -9    0.05    0.09
   1   1  -9    0.01    0.07
   1   1  -9    0.02    0.07
   1   1  -9    0.05    0.08
   1   1  -9    0.07    0.10
   1   1  -9    0.10    0.10
   1   1  -9   -0.04    0.10
   0  -1   9    0.69    0.12
   0  -1   9    0.68    0.12
   0  -1   9    0.48    0.14
   0  -1   9    0.66    0.14
   0  -1   9    1.15    0.13
   0   1  -9    0.58    0.10
   0   1  -9    0.89    0.12
   0   1  -9    0.80    0.12
   0   1  -9    0.51    0.11
   0   1  -9    0.52    0.12
   0   1  -9    0.59    0.11
   0   1  -9    0.63    0.10
   1  -1   9   27.24    1.30
   1  -1   9   26.46    1.13
   1  -1   9   25.40    1.12
  -1   1  -9   25.34    1.14
  -1   1  -9   27.47    1.14
  -1   1  -9   26.30    1.13
  -1   1  -9   26.27    1.13
   2  -1   9   28.22    1.19
   2  -1   9   26.73    1.18
  -2   1  -9   28.43    1.19
  -2   1  -9   28.92    1.19
   3  -1   9   13.45    0.58
   3  -1   9   14.08    0.57
  -3   1  -9   11.32    0.58
  -3   1  -9   13.59    0.58
  -6  -1   8   23.84    1.01
  -6  -1   8   25.75    1.00
   6   1  -8   23.23    1.03
   6   1  -8   24.91    0.99
   6   1  -8   23.85    1.02
   6   1  -8   24.07    1.00
   6   1  -8   24.04    1.00
  -5  -1   8    0.80    0.13
  -5  -1   8    0.55    0.18
  -5  -1   8    0.63    0.11
  -5  -1   8    0.70    0.10
   5   1  -8    0.74    0.09
   5   1  -8    0.65    0.09
   5   1  -8    0.73    0.11
   5   1  -8    0.72    0.12
   5   1  -8    0.58    0.09
   5   1  -8    0.78    0.11
   5   1  -8    0.58    0.10
   5   1  -8    0.56    0.11
  -4  -1   8    0.15    0.10
  -4  -1   8    0.14    0.11
  -4  -1   8    0.18    0.10
  -4  -1   8    0.10    0.08
  -4  -1   8    0.23    0.09
  -4  -1   8    0.19    0.15
   4   1  -8    0.25    0.08
   4   1  -8    0.04    0.08
   4   1  -8    0.19    0.07
   4   1  -8    0.15    0.08
   4   1  -8    0.07    0.08
   4   1  -8    0.22    0.09
   4   1  -8    0.09    0.08
   4   1  -8    0.04    0.07
   4   1  -8    0.19    0.08
   4   1  -8    0.17    0.09
   4   1  -8    0.16    0.07
  -3  -1   8    0.22    0.10
  -3  -1   8    0.21    0.09
  -3  -1   8    0.25    0.10
  -3  -1   8    0.22    0.10
  -3  -1   8    0.27    0.11
  -3  -1   8    0.24    0.08
   3   1  -8    0.26    0.09
   3   1  -8    0.26    0.08
   3   1  -8    0.10    0.10
   3   1  -8    0.21    0.07
   3   1  -8    0.28    0.09
  -2  -1   8    8.65    0.46
  -2  -1   8    8.72    0.42
  -2  -1   8    8.50    0.43
  -2  -1   8    8.51    0.44
  -2  -1   8    8.81    0.47
  -2  -1   8    8.00    0.46
  -2  -1   8    9.24    0.49
   2   1  -8    7.28    0.41
   2   1  -8    7.66    0.43
   2   1  -8    7.99    0.42
   2   1  -8    7.30    0.41
   2   1  -8    7.85    0.42
   2   1  -8    8.08    0.41
  -1  -1   8   22.42    1.00
  -1  -1   8   21.20    1.11
  -1  -1   8   24.17    1.05
  -1  -1   8   26.11    1.10
  -1  -1   8   21.94    1.04
   1   1  -8   22.67    0.99
   1   1  -8   21.31    0.99
   1   1  -8   23.45    1.00
   1   1  -8   21.91    1.01
   0  -1   8   25.54    1.11
   0  -1   8   24.15    1.17
   0   1  -8   25.31    1.05
   0   1  -8   22.51    1.04
   0   1  -8   23.00    1.07
   0   1  -8   24.16    1.05
   1  -1   8    1.82    0.27
   1  -1   8    1.52    0.23
  -1   1  -8    1.52    0.15
  -1   1  -8    1.35    0.18
  -1   1  -8    1.92    0.17
   2  -1   8   22.87    1.13
   2  -1   8   23.68    0.99
   2  -1   8   22.68    0.97
  -2   1  -8   20.69    0.99
  -2   1  -8   23.12    1.00
  -2   1  -8   22.93    0.99
   3  -1   8    2.92    0.20
   3  -1   8    2.88    0.18
  -3   1  -8    2.74    0.20
  -3   1  -8    2.86    0.19
   4  -1   8    0.48    0.08
  -4   1  -8    0.42    0.09
  -4   1  -8    0.49    0.06
  -6  -1   7    0.42    0.16
  -6  -1   7    0.42    0.08
   6   1  -7    0.31    0.08
   6   1  -7    0.38    0.07
   6   1  -7    0.38    0.07
   6   1  -7    0.30    0.09
   6   1  -7    0.25    0.06
   6   1  -7    0.37    0.08
   6   1  -7    0.52    0.08
  -5  -1   7   13.88    0.64
  -5  -1   7   14.09    0.65
  -5  -1   7   13.32    0.62
  -5  -1   7   12.25    0.61
  -5  -1   7   11.82    0.67
   5   1  -7   13.59    0.59
   5   1  -7   13.17    0.62
   5   1  -7   13.59    0.59
   5   1  -7   13.36    0.64
   5   1  -7   12.73    0.64
   5   1  -7   14.09    0.67
   5   1  -7   12.97    0.63
   5   1  -7   13.08    0.61
   5   1  -7   12.97    0.60
  -4  -1   7    1.80    0.19
  -4  -1   7    1.38    0.16
  -4  -1   7    2.04    0.19
  -4  -1   7    1.37    0.18
  -4  -1   7    1.54    0.19
  -4  -1   7    1.80    0.18
  -4  -1   7    1.90    0.21
  -4  -1   7    1.59    0.16
   4   1  -7    1.55    0.15
   4   1  -7    1.49    0.17
   4   1  -7    1.70    0.17
   4   1  -7    1.41    0.18
   4   1  -7    1.55    0.14
   4   1  -7    1.46    0.16
   4   1  -7    1.49    0.16
   4   1  -7    1.52    0.17
   4   1  -7    1.49    0.15
   4   1  -7    1.41    0.17
   4   1  -7    1.41    0.18
   4   1  -7    1.39    0.17
   4   1  -7    1.62    0.17
  -3  -1   7   37.51    1.56
  -3  -1   7   38.55    1.60
  -3  -1   7   38.36    1.59
  -3  -1   7   33.35    1.57
  -3  -1   7   37.32    1.56
  -3  -1   7   35.86    1.56
   3   1  -7   36.65    1.55
   3   1  -7   38.22    1.55
   3   1  -7   36.90    1.55
   3   1  -7   38.52    1.56
   3   1  -7   34.57    1.57
   3   1  -7   36.46    1.55
  -2  -1   7    9.68    0.48
  -2  -1   7    8.32    0.42
  -2  -1   7    8.56    0.43
  -2  -1   7    9.35    0.47
  -2  -1   7    8.90    0.44
  -2  -1   7    7.80    0.48
  -2  -1   7    8.60    0.45
   2   1  -7    8.16    0.42
   2   1  -7    8.36    0.42
   2   1  -7    8.42    0.42
   2   1  -7    8.31    0.44
   2   1  -7    8.48    0.41
  -1  -1   7   31.01    1.38
  -1  -1   7   31.59    1.41
  -1  -1   7   30.95    1.34
  -1  -1   7   33.39    1.39
  -1  -1   7   31.36    1.35
  -1  -1   7   32.03    1.39
  -1  -1   7   31.08    1.41
   1   1  -7   31.57    1.36
   1   1  -7   32.33    1.33
   1   1  -7   33.22    1.34
   1   1  -7   30.79    1.32
   1   1  -7   31.72    1.34
   0  -1   7   46.19    2.11
   0  -1   7   53.15    2.10
   0  -1   7   49.11    2.15
   0   1  -7   49.34    2.05
   0   1  -7   50.33    2.05
   0   1  -7   49.69    2.07
   1  -1   7    0.06    0.09
   1  -1   7    0.10    0.08
  -1   1  -7    0.08    0.06
  -1   1  -7    0.06    0.06
  -1   1  -7    0.14    0.08
   2  -1   7    0.57    0.11
   2  -1   7    0.43    0.16
  -2   1  -7    0.54    0.10
   3  -1   7    0.42    0.08
   3  -1   7    0.48    0.11
   3  -1   7    0.31    0.09
  -3   1  -7    0.41    0.08
  -3   1  -7    0.47    0.11
  -3   1  -7    0.49    0.10
  -3   1  -7    0.33    0.09
   4  -1   7    7.35    0.33
   4  -1   7    6.81    0.34
  -4   1  -7    7.02    0.37
  -4   1  -7    6.81    0.34
  -4   1  -7    7.14    0.38
  -6  -1   6    0.17    0.07
  -6  -1   6   -0.10    0.09
  -6  -1   6    0.08    0.13
   6   1  -6    0.05    0.05
   6   1  -6    0.13    0.06
   6   1  -6    0.10    0.07
   6   1  -6    0.11    0.06
   6   1  -6    0.05    0.14
   6   1  -6    0.07    0.08
   6   1  -6    0.11    0.06
   6   1  -6   -0.01    0.07
  -5  -1   6    2.28    0.24
  -5  -1   6    2.21    0.21
  -5  -1   6    2.41    0.21
  -5  -1   6    2.35    0.25
  -5  -1   6    2.21    0.21
  -5  -1   6    2.53    0.21
   5   1  -6    2.09    0.20
   5   1  -6    2.16    0.17
   5   1  -6    2.54    0.19
   5   1  -6    2.20    0.19
   5   1  -6    2.34    0.19
   5   1  -6    2.26    0.17
   5   1  -6    2.59    0.22
   5   1  -6    2.48    0.17
   5   1  -6    1.97    0.19
   5   1  -6    2.56    0.20
   5   1  -6    2.21    0.21
  -4  -1   6   20.47    0.93
  -4  -1   6   18.90    0.89
  -4  -1   6   20.16    0.90
  -4  -1   6   20.68    0.90
  -4  -1   6   20.30    0.95
  -4  -1   6   18.77    0.93
  -4  -1   6   21.27    0.91
  -4  -1   6   20.31    0.88
   4   1  -6   20.70    0.89
   4   1  -6   20.12    0.92
   4   1  -6   19.64    0.89
   4   1  -6   19.73    0.89
   4   1  -6   18.97    0.91
   4   1  -6   20.12    0.90
   4   1  -6   20.80    0.90
  -3  -1   6  112.38    4.78
  -3  -1   6  115.81    4.78
  -3  -1   6  122.44    4.79
  -3  -1   6  125.50    4.83
  -3  -1   6  125.17    4.82
  -3  -1   6  119.99    4.79
   3   1  -6  117.64    4.81
   3   1  -6  121.71    4.79
   3   1  -6  103.03    4.81
   3   1  -6  114.82    4.78
   3   1  -6  123.50    4.78
   3   1  -6  118.03    4.80
   3   1  -6  123.41    4.79
   3   1  -6  120.33    4.79
  -2  -1   6   56.98    2.39
  -2  -1   6   52.78    2.32
  -2  -1   6   59.38    2.36
  -2  -1   6   56.51    2.33
  -2  -1   6   60.83    2.37
  -2  -1   6   57.24    2.32
  -2  -1   6   55.86    2.34
   2   1  -6   57.26    2.34
   2   1  -6   56.66    2.31
   2   1  -6   55.77    2.32
   2   1  -6   57.28    2.32
   2   1  -6   55.51    2.32
  -1  -1   6   10.20    0.54
  -1  -1   6   10.66    0.50
  -1  -1   6   11.64    0.54
  -1  -1   6   10.60    0.52
  -1  -1   6   11.36    0.53
  -1  -1   6   11.51    0.56
   1   1  -6   10.32    0.48
   1   1  -6   10.55    0.49
   1   1  -6   10.62    0.49
   1   1  -6   10.76    0.50
   1   1  -6   11.32    0.51
   0  -1   6    2.27    0.21
   0  -1   6    2.22    0.19
   0  -1   6    2.50    0.20
   0   1  -6    2.63    0.17
   0   1  -6    2.32    0.17
   0   1  -6    2.34    0.16
   1  -1   6   69.41    2.90
   1  -1   6   67.85    2.82
  -1   1  -6   69.25    2.79
  -1   1  -6   67.62    2.81
  -1   1  -6   68.80    2.79
   2  -1   6    4.31    0.33
   2  -1   6    3.10    0.24
   2  -1   6    2.94    0.40
  -2   1  -6    2.71    0.24
  -2   1  -6    4.20    0.23
  -2   1  -6    3.74    0.25
  -2   1  -6    3.89    0.23
   3  -1   6    4.10    0.26
   3  -1   6    4.59    0.27
   3  -1   6    4.24    0.26
   3  -1   6    4.66    0.30
  -3   1  -6    4.83    0.28
  -3   1  -6    4.26    0.27
  -3   1  -6    4.43    0.30
  -3   1  -6    4.87    0.28
   4  -1   6   13.67    0.62
   4  -1   6   14.33    0.64
   4  -1   6   12.66    0.71
  -4   1  -6   14.70    0.68
  -4   1  -6   14.89    0.65
   5  -1   6   10.40    0.43
  -5   1  -6    8.67    0.44
  -5   1  -6    9.20    0.43
  -6  -1   5    1.10    0.16
  -6  -1   5    1.29    0.13
  -6  -1   5    1.13    0.12
   6   1  -5    0.88    0.11
   6   1  -5    1.15    0.11
   6   1  -5    1.05    0.14
   6   1  -5    1.07    0.11
   6   1  -5    1.08    0.13
   6   1  -5    1.09    0.12
   6   1  -5    1.03    0.12
   6   1  -5    1.10    0.11
  -5  -1   5   11.55    0.62
  -5  -1   5   12.46    0.57
  -5  -1   5   12.07    0.59
  -5  -1   5   11.91    0.58
  -5  -1   5   12.04    0.58
  -5  -1   5   12.07    0.59
   5   1  -5   12.56    0.57
   5   1  -5   11.68    0.54
   5   1  -5   11.30    0.56
   5   1  -5   12.06    0.59
   5   1  -5   10.97    0.55
   5   1  -5   11.38    0.57
   5   1  -5   11.29    0.54
   5   1  -5   11.37    0.57
   5   1  -5   11.34    0.53
   5   1  -5   11.66    0.60
   5   1  -5   12.69    0.62
   5   1  -5   12.02    0.58
  -4  -1   5    3.34    0.22
  -4  -1   5    3.41    0.22
  -4  -1   5    3.19    0.25
  -4  -1   5    3.75    0.24
  -4  -1   5    3.36    0.25
  -4  -1   5    3.56    0.21
  -4  -1   5    3.56    0.23
  -4  -1   5    3.27    0.24
  -4  -1   5    3.33    0.26
   4   1  -5    3.47    0.23
   4   1  -5    3.33    0.22
   4   1  -5    3.46    0.22
   4   1  -5    3.30    0.25
   4   1  -5    3.89    0.25
   4   1  -5    3.40    0.23
   4   1  -5    3.47    0.23
  -3  -1   5  130.33    5.64
  -3  -1   5  142.91    5.69
  -3  -1   5  143.19    5.66
  -3  -1   5  141.52    5.67
  -3  -1   5  141.22    5.66
  -3  -1   5  145.12    5.68
  -3  -1   5  135.41    5.65
   3   1  -5  140.13    5.68
   3   1  -5  139.01    5.70
   3   1  -5  140.14    5.65
   3   1  -5  140.69    5.66
   3   1  -5  140.79    5.66
   3   1  -5  144.63    5.67
   3   1  -5  145.55    5.68
   3   1  -5  146.25    5.65
  -2  -1   5    2.14    0.15
  -2  -1   5    2.29    0.18
  -2  -1   5    2.34    0.16
  -2  -1   5    2.12    0.16
  -2  -1   5    2.57    0.18
  -2  -1   5    2.53    0.18
   2   1  -5    2.88    0.17
   2   1  -5    2.21    0.16
   2   1  -5    1.83    0.16
   2   1  -5    2.43    0.15
   2   1  -5    2.51    0.17
   2   1  -5    2.55    0.15
   2   1  -5    2.57    0.15
  -1  -1   5  235.96    9.53
  -1  -1   5  259.04    9.56
  -1  -1   5  247.12    9.53
  -1  -1   5  213.93    9.60
  -1  -1   5  242.96    9.53
   1   1  -5  237.65    9.50
   1   1  -5  246.69    9.52
   1   1  -5  239.46    9.50
   1   1  -5  251.19    9.52
   1   1  -5  238.90    9.50
   1   1  -5  247.15    9.51
   1   1  -5  207.16    9.60
   0  -1   5   20.60    0.86
   0  -1   5   18.33    0.87
   0  -1   5   20.11    0.87
   0  -1   5   18.92    0.89
   0  -1   5   20.54    0.88
   0   1  -5   20.18    0.84
   0   1  -5   19.69    0.85
   0   1  -5   19.46    0.83
   1  -1   5    4.11    0.29
   1  -1   5    4.06    0.37
   1  -1   5    3.79    0.25
   1  -1   5    3.76    0.24
  -1   1  -5    3.69    0.22
  -1   1  -5    3.71    0.21
  -1   1  -5    3.75    0.22
   2  -1   5    0.11    0.07
   2  -1   5    0.13    0.10
   2  -1   5    0.12    0.12
  -2   1  -5    0.26    0.07
  -2   1  -5    0.10    0.07
  -2   1  -5    0.19    0.08
   3  -1   5    7.33    0.71
   3  -1   5    9.63    0.45
   3  -1   5   10.26    0.47
  -3   1  -5    9.08    0.49
  -3   1  -5   10.27    0.48
  -3   1  -5    9.62    0.47
  -3   1  -5    9.80    0.47
   4  -1   5    0.16    0.08
   4  -1   5    0.04    0.06
   4  -1   5    0.30    0.10
   4  -1   5    0.10    0.07
   4  -1   5    0.07    0.06
  -4   1  -5    0.33    0.10
  -4   1  -5    0.31    0.09
  -4   1  -5    0.16    0.08
  -4   1  -5    0.09    0.08
   5  -1   5    1.11    0.11
   5  -1   5    1.38    0.11
   5  -1   5    1.07    0.13
  -5   1  -5    1.04    0.13
  -5   1  -5    1.13    0.12
  -5   1  -5    0.96    0.11
  -6  -1   4   15.05    0.67
  -6  -1   4   14.52    0.71
  -6  -1   4   15.38    0.73
   6   1  -4   15.51    0.70
   6   1  -4   15.37    0.66
   6   1  -4   14.59    0.68
   6   1  -4   14.31    0.71
   6   1  -4   15.00    0.65
   6   1  -4   15.41    0.66
   6   1  -4   15.77    0.68
   6   1  -4   15.27    0.67
   6   1  -4   15.35    0.69
  -5  -1   4   36.90    1.52
  -5  -1   4   35.27    1.52
  -5  -1   4   34.96    1.52
  -5  -1   4   36.63    1.51
  -5  -1   4   35.90    1.52
  -5  -1   4   34.59    1.56
  -5  -1   4   38.44    1.50
   5   1  -4   36.81    1.51
   5   1  -4   32.80    1.48
   5   1  -4   37.23    1.51
   5   1  -4   36.48    1.54
   5   1  -4   35.47    1.49
   5   1  -4   34.04    1.50
   5   1  -4   35.32    1.51
   5   1  -4   36.56    1.55
   5   1  -4   34.68    1.52
   5   1  -4   35.28    1.48
   5   1  -4   34.38    1.55
   5   1  -4   34.06    1.47
  -4  -1   4   13.76    0.64
  -4  -1   4   12.67    0.59
  -4  -1   4   12.81    0.64
  -4  -1   4   13.28    0.61
  -4  -1   4   12.89    0.64
  -4  -1   4   13.05    0.59
   4   1  -4   12.97    0.60
   4   1  -4   13.06    0.61
   4   1  -4   10.37    0.61
   4   1  -4   13.60    0.63
   4   1  -4   13.49    0.60
   4   1  -4   12.40    0.60
   4   1  -4   13.49    0.63
  -3  -1   4   25.87    1.12
  -3  -1   4   25.46    1.10
  -3  -1   4   25.42    1.09
  -3  -1   4   25.30    1.12
  -3  -1   4   25.05    1.09
  -3  -1   4   26.91    1.13
   3   1  -4   25.73    1.09
   3   1  -4   26.13    1.10
   3   1  -4   26.41    1.10
   3   1  -4   27.16    1.12
   3   1  -4   26.97    1.14
   3   1  -4   26.25    1.10
   3   1  -4   26.48    1.12
  -2  -1   4    3.21    0.17
  -2  -1   4    3.22    0.20
  -2  -1   4    3.42    0.21
  -2  -1   4    3.21    0.20
   2   1  -4    3.29    0.19
   2   1  -4    3.26    0.20
   2   1  -4    3.24    0.18
   2   1  -4    3.22    0.23
   2   1  -4    3.22    0.17
   2   1  -4    3.14    0.19
   2   1  -4    2.95    0.17
   2   1  -4    3.47    0.19
  -1  -1   4  200.65    7.80
  -1  -1   4  190.33    7.78
   1   1  -4  194.91    7.81
   1   1  -4  197.42    7.78
   1   1  -4  193.15    7.78
   0  -1   4   33.63    1.35
   0  -1   4   33.29    1.38
   0   1  -4   33.15    1.38
   0   1  -4   32.75    1.35
   0   1  -4   31.79    1.35
   1  -1   4   46.29    1.81
   1  -1   4   47.18    1.99
   1  -1   4   42.92    1.83
  -1   1  -4   41.95    1.78
  -1   1  -4   41.72    1.77
  -1   1  -4   40.88    1.77
   2  -1   4    0.13    0.10
   2  -1   4    0.01    0.04
   2  -1   4    0.02    0.08
  -2   1  -4    0.03    0.04
  -2   1  -4    0.05    0.06
  -2   1  -4   -0.01    0.05
   3  -1   4    4.73    0.52
  -3   1  -4    5.38    0.29
  -3   1  -4    4.93    0.29
  -3   1  -4    5.32    0.32
   4  -1   4    0.05    0.06
   4  -1   4    0.18    0.07
   4  -1   4    0.00    0.08
   4  -1   4    0.01    0.07
   4  -1   4    0.02    0.06
  -4   1  -4    0.00    0.09
  -4   1  -4    0.05    0.08
  -4   1  -4   -0.04    0.06
  -4   1  -4    0.09    0.06
  -4   1  -4    0.15    0.07
   5  -1   4    1.05    0.11
   5  -1   4    1.23    0.15
   5  -1   4    1.26    0.15
   5  -1   4    1.22    0.12
  -5   1  -4    1.41    0.14
  -5   1  -4    1.38    0.16
  -5   1  -4    1.07    0.13
  -6  -1   3    4.65    0.26
  -6  -1   3    4.44    0.36
  -6  -1   3    4.61    0.26
  -6  -1   3    4.53    0.34
  -6  -1   3    4.98    0.31
   6   1  -3    4.76    0.26
   6   1  -3    4.87    0.27
   6   1  -3    4.51    0.28
   6   1  -3    4.79    0.25
   6   1  -3    4.31    0.27
   6   1  -3    4.35    0.25
   6   1  -3    4.44    0.26
   6   1  -3    4.84    0.29
   6   1  -3    4.58    0.24
  -5  -1   3    9.70    0.53
  -5  -1   3    8.90    0.53
  -5  -1   3    9.68    0.48
  -5  -1   3    9.85    0.49
  -5  -1   3    9.42    0.49
  -5  -1   3    9.96    0.49
   5   1  -3    8.93    0.45
   5   1  -3    9.48    0.48
   5   1  -3    9.03    0.45
   5   1  -3    8.39    0.50
   5   1  -3    9.93    0.49
   5   1  -3    9.61    0.49
   5   1  -3   10.39    0.48
   5   1  -3    9.77    0.46
   5   1  -3    9.83    0.47
   5   1  -3    9.51    0.51
   5   1  -3    8.87    0.46
   5   1  -3    8.50    0.44
  -4  -1   3    8.54    0.46
  -4  -1   3    8.03    0.45
  -4  -1   3    8.33    0.39
  -4  -1   3    7.78    0.38
  -4  -1   3    8.39    0.41
  -4  -1   3    7.67    0.43
   4   1  -3    7.63    0.41
   4   1  -3    8.20    0.40
   4   1  -3    7.82    0.42
   4   1  -3    7.53    0.44
   4   1  -3    8.22    0.41
   4   1  -3    7.43    0.40
   4   1  -3    7.67    0.43
  -3  -1   3   63.12    2.68
  -3  -1   3   60.87    2.67
  -3  -1   3   64.43    2.70
  -3  -1   3   69.38    2.72
  -3  -1   3   70.98    2.72
   3   1  -3   68.10    2.69
   3   1  -3   70.37    2.71
   3   1  -3   68.82    2.72
   3   1  -3   64.41    2.69
   3   1  -3   65.01    2.68
   3   1  -3   66.87    2.70
   3   1  -3   62.93    2.67
  -2  -1   3   75.44    3.07
  -2  -1   3   73.23    3.06
   2   1  -3   73.86    3.06
   2   1  -3   78.71    3.07
   2   1  -3   78.71    3.12
  -1  -1   3    3.32    0.19
   1   1  -3    3.62    0.20
   1   1  -3    3.39    0.17
   1   1  -3    3.55    0.18
   0  -1   3  139.31    5.63
   0  -1   3  147.51    5.62
   0   1  -3  135.78    5.62
   0   1  -3  141.88    5.65
   1  -1   3    0.44    0.12
   1  -1   3    0.32    0.05
   1  -1   3    0.36    0.07
  -1   1  -3    0.46    0.06
  -1   1  -3    0.43    0.08
  -1   1  -3    0.41    0.06
   2  -1   3   14.08    0.64
   2  -1   3   10.81    0.53
   2  -1   3   12.27    0.60
   2  -1   3   12.10    0.58
   2  -1   3   11.77    0.74
  -2   1  -3   11.82    0.53
  -2   1  -3   11.29    0.53
  -2   1  -3   11.69    0.54
   3  -1   3   65.11    2.66
   3  -1   3   55.86    2.53
   3  -1   3   57.64    2.81
   3  -1   3   59.35    2.46
  -3   1  -3   59.81    2.46
  -3   1  -3   62.11    2.47
  -3   1  -3   61.10    2.49
   4  -1   3    0.03    0.14
   4  -1   3    0.00    0.12
   4  -1   3   -0.06    0.06
   4  -1   3   -0.05    0.06
  -4   1  -3    0.11    0.08
  -4   1  -3    0.01    0.07
  -4   1  -3    0.04    0.06
  -4   1  -3   -0.04    0.07
  -4   1  -3    0.04    0.06
   5  -1   3    3.43    0.21
   5  -1   3    3.63    0.27
   5  -1   3    3.32    0.24
   5  -1   3    3.71    0.23
   5  -1   3    3.95    0.23
   5  -1   3    3.45    0.24
  -5   1  -3    3.63    0.24
  -5   1  -3    3.54    0.27
  -5   1  -3    3.86    0.21
  -5   1  -3    3.29    0.25
   6  -1   3   -0.01    0.07
   6  -1   3    0.01    0.04
   6  -1   3    0.02    0.04
   6  -1   3    0.02    0.07
  -6   1  -3    0.01    0.05
  -6   1  -3    0.05    0.09
  -6  -1   2   27.96    1.18
  -6  -1   2   25.60    1.20
  -6  -1   2   28.70    1.20
  -6  -1   2   28.28    1.17
   6   1  -2   26.08    1.16
   6   1  -2   29.62    1.18
   6   1  -2   27.19    1.18
   6   1  -2   28.97    1.20
   6   1  -2   27.90    1.18
   6   1  -2   27.33    1.16
   6   1  -2   27.37    1.16
   6   1  -2   28.55    1.18
   6   1  -2   28.98    1.21
  -5  -1   2    7.46    0.39
  -5  -1   2    6.78    0.37
  -5  -1   2    6.82    0.44
  -5  -1   2    7.35    0.39
  -5  -1   2    6.93    0.39
  -5  -1   2    7.86    0.37
  -5  -1   2    7.09    0.44
  -5  -1   2    7.10    0.39
   5   1  -2    7.91    0.39
   5   1  -2    6.53    0.53
   5   1  -2    6.49    0.35
   5   1  -2    6.55    0.35
   5   1  -2    7.27    0.39
   5   1  -2    7.26    0.37
   5   1  -2    7.32    0.38
   5   1  -2    6.31    0.37
   5   1  -2    7.03    0.39
   5   1  -2    6.96    0.35
   5   1  -2    7.41    0.38
   5   1  -2    7.69    0.40
   5   1  -2    7.52    0.42
  -4  -1   2   13.35    0.61
  -4  -1   2   12.68    0.62
  -4  -1   2   12.21    0.56
  -4  -1   2   12.67    0.58
  -4  -1   2   12.30    0.62
  -4  -1   2   12.09    0.54
   4   1  -2   11.66    0.56
   4   1  -2   11.93    0.57
   4   1  -2   12.20    0.60
   4   1  -2   12.23    0.58
   4   1  -2   11.50    0.62
   4   1  -2   11.59    0.72
  -3  -1   2   11.22    0.51
  -3  -1   2   11.61    0.55
  -3  -1   2   11.91    0.55
  -3  -1   2   10.80    0.52
  -3  -1   2   11.51    0.54
  -3  -1   2   11.23    0.50
   3   1  -2   11.59    0.52
   3   1  -2   11.65    0.52
   3   1  -2   11.88    0.54
   3   1  -2   11.61    0.54
   3   1  -2   11.90    0.53
   3   1  -2   12.21    0.55
   3   1  -2   12.29    0.64
  -2  -1   2  638.38   25.37
  -2  -1   2  599.66   25.37
  -2  -1   2  624.80   25.31
   2   1  -2  662.21   25.38
   2   1  -2  663.83   25.47
   2   1  -2  633.71   25.35
  -1  -1   2   47.87    2.00
   1   1  -2   48.40    1.99
   1   1  -2   52.22    2.02
   0  -1   2  627.19   25.60
   0  -1   2  602.21   25.70
   0  -1   2  651.34   25.65
   0   1  -2  649.27   25.54
   0   1  -2  674.79   25.74
   1  -1   2   46.70    2.06
   1  -1   2   49.45    2.07
   1  -1   2   56.88    2.21
   1  -1   2   54.52    2.09
  -1   1  -2   49.60    2.07
  -1   1  -2   51.94    2.10
   2  -1   2    0.75    0.08
   2  -1   2    0.82    0.19
   2  -1   2    0.81    0.10
  -2   1  -2    0.71    0.11
  -2   1  -2    0.68    0.11
  -2   1  -2    0.78    0.10
  -2   1  -2    0.65    0.08
  -2   1  -2    0.79    0.10
   3  -1   2    8.11    0.51
   3  -1   2    7.67    0.39
   3  -1   2    7.70    0.40
   3  -1   2    7.11    0.37
   3  -1   2    7.76    0.43
   3  -1   2    7.56    0.59
  -3   1  -2    7.54    0.42
  -3   1  -2    7.48    0.39
  -3   1  -2    6.45    0.35
  -3   1  -2    7.65    0.36
  -3   1  -2    7.78    0.38
  -3   1  -2    7.92    0.40
  -3   1  -2    8.19    0.42
  -3   1  -2    7.89    0.38
   4  -1   2    5.25    0.30
   4  -1   2    4.47    0.28
   4  -1   2    4.84    0.44
   4  -1   2    5.56    0.55
   4  -1   2    4.74    0.28
  -4   1  -2    4.86    0.32
  -4   1  -2    6.06    0.31
  -4   1  -2    5.11    0.30
  -4   1  -2    5.46    0.30
  -4   1  -2    4.30    0.28
  -4   1  -2    4.43    0.26
   5  -1   2   15.28    0.69
   5  -1   2   15.86    0.70
   5  -1   2   14.25    0.67
   5  -1   2   16.70    0.75
   5  -1   2   12.71    0.87
   5  -1   2   14.69    0.68
  -5   1  -2   15.41    0.68
  -5   1  -2   16.25    0.76
  -5   1  -2   16.07    0.72
  -5   1  -2   15.62    0.69
  -5   1  -2   14.93    0.70
   6  -1   2    0.76    0.18
   6  -1   2    1.08    0.11
   6  -1   2    1.06    0.09
   6  -1   2    0.89    0.09
   6  -1   2    0.66    0.11
  -6   1  -2    0.85    0.10
  -6   1  -2    0.75    0.11
  -6  -1   1    3.00    0.20
  -6  -1   1    2.89    0.24
  -6  -1   1    2.90    0.18
   6   1  -1    2.39    0.19
   6   1  -1    2.79    0.19
   6   1  -1    2.60    0.21
   6   1  -1    3.26    0.22
   6   1  -1    2.70    0.19
   6   1  -1    2.74    0.19
   6   1  -1    2.89    0.18
  -5  -1   1   15.50    0.68
  -5  -1   1   15.21    0.66
  -5  -1   1   14.60    0.73
  -5  -1   1   14.86    0.68
  -5  -1   1   14.74    0.68
  -5  -1   1   13.84    0.66
   5   1  -1   14.67    0.66
   5   1  -1   14.11    0.68
   5   1  -1   13.12    0.85
   5   1  -1   14.45    0.66
   5   1  -1   13.68    0.68
   5   1  -1   13.84    0.66
   5   1  -1   15.17    0.67
   5   1  -1   14.55    0.68
   5   1  -1   14.98    0.67
   5   1  -1   12.78    0.63
   5   1  -1   14.68    0.71
  -4  -1   1  131.04    5.32
  -4  -1   1  131.15    5.35
  -4  -1   1  135.85    5.40
  -4  -1   1  136.26    5.34
  -4  -1   1  129.28    5.35
  -4  -1   1  136.72    5.40
  -4  -1   1  135.19    5.41
   4   1  -1  133.78    5.41
   4   1  -1  132.33    5.35
   4   1  -1  134.16    5.38
   4   1  -1  128.83    5.33
   4   1  -1  132.28    5.56
   4   1  -1  132.48    5.36
  -3  -1   1  104.73    4.43
  -3  -1   1  116.14    4.49
  -3  -1   1  115.99    4.48
  -3  -1   1  104.33    4.45
  -3  -1   1  112.44    4.48
   3   1  -1  106.67    4.46
   3   1  -1  114.66    4.48
   3   1  -1  116.02    4.58
   3   1  -1  108.85    4.45
   3   1  -1  109.18    4.45
  -2  -1   1   10.70    0.49
   2   1  -1   11.53    0.48
   2   1  -1   11.34    0.49
   2   1  -1   11.15    0.53
   2   1  -1   10.78    0.48
  -1  -1   1   81.09    3.30
   1   1  -1   81.68    3.30
   1   1  -1   85.39    3.32
   0  -1   1  274.15   11.43
   0   1  -1  294.37   11.44
   1  -1   1  709.39   28.48
   1  -1   1  689.22   28.61
  -1   1  -1  692.95   28.48
  -1   1  -1  765.45   28.75
   2  -1   1  166.68    6.18
   2  -1   1  144.75    6.05
   2  -1   1  148.40    6.00
   2  -1   1  149.74    6.01
  -2   1  -1  150.76    6.05
  -2   1  -1  147.36    5.99
  -2   1  -1  142.81    5.99
   3  -1   1    3.16    0.28
   3  -1   1    3.00    0.34
   3  -1   1    2.91    0.19
   3  -1   1    2.85    0.19
   3  -1   1    3.16    0.22
   3  -1   1    3.19    0.21
   3  -1   1    2.77    0.18
  -3   1  -1    3.22    0.22
  -3   1  -1    2.94    0.17
  -3   1  -1    2.82    0.19
  -3   1  -1    2.95    0.20
  -3   1  -1    2.97    0.22
   4  -1   1    5.98    0.33
   4  -1   1    6.15    0.35
   4  -1   1    5.43    0.53
   4  -1   1    5.31    0.30
   4  -1   1    5.85    0.33
   4  -1   1    5.01    0.39
   4  -1   1    5.55    0.46
  -4   1  -1    5.66    0.37
  -4   1  -1    6.39    0.36
  -4   1  -1    6.11    0.33
  -4   1  -1    5.83    0.37
  -4   1  -1    5.49    0.29
  -4   1  -1    4.96    0.31
  -4   1  -1    5.55    0.30
  -4   1  -1    5.73    0.32
   5  -1   1    4.00    0.27
   5  -1   1    3.89    0.26
   5  -1   1    3.35    0.38
   5  -1   1    3.83    0.24
   5  -1   1    3.73    0.24
   5  -1   1    3.39    0.24
   5  -1   1    4.26    0.29
   5  -1   1    4.02    0.24
   5  -1   1    3.51    0.22
  -5   1  -1    4.20    0.30
  -5   1  -1    4.04    0.27
  -5   1  -1    3.87    0.24
  -5   1  -1    4.38    0.26
  -5   1  -1    4.29    0.27
  -5   1  -1    4.03    0.25
   6  -1   1    5.97    0.35
   6  -1   1    5.79    0.34
   6  -1   1    6.22    0.31
   6  -1   1    6.46    0.32
   6  -1   1    6.24    0.30
   6  -1   1    6.94    0.32
  -6   1  -1    5.97    0.31
  -6   1  -1    6.45    0.30
  -6   1  -1    5.76    0.34
  -6  -1   0    1.27    0.12
  -6  -1   0    1.44    0.13
  -6  -1   0    1.27    0.15
   6   1   0    1.39    0.12
   6   1   0    1.34    0.14
   6   1   0    1.13    0.17
   6   1   0    1.13    0.15
   6   1   0    1.12    0.12
   6   1   0    1.25    0.13
   6   1   0    1.28    0.13
  -5  -1   0    3.18    0.26
  -5  -1   0    2.78    0.21
  -5  -1   0    3.22    0.23
  -5  -1   0    3.09    0.21
  -5  -1   0    3.25    0.22
   5   1   0    2.85    0.22
   5   1   0    3.30    0.22
   5   1   0    2.68    0.34
   5   1   0    2.80    0.22
   5   1   0    3.11    0.20
   5   1   0    3.33    0.22
   5   1   0    3.21    0.22
   5   1   0    3.10    0.25
  -4  -1   0  192.14    7.45
  -4  -1   0  186.84    7.50
  -4  -1   0  184.33    7.43
  -4  -1   0  189.64    7.52
  -4  -1   0  193.35    7.50
  -4  -1   0  187.68    7.44
  -4  -1   0  183.22    7.45
   4   1   0  188.63    7.48
   4   1   0  176.04    7.43
   4   1   0  183.58    7.67
   4   1   0  181.57    7.50
   4   1   0  184.04    7.45
   4   1   0  187.50    7.46
  -3  -1   0    4.94    0.30
  -3  -1   0    5.20    0.27
  -3  -1   0    4.69    0.24
  -3  -1   0    4.67    0.25
  -3  -1   0    5.34    0.31
  -3  -1   0    4.88    0.28
   3   1   0    4.94    0.28
   3   1   0    4.77    0.26
   3   1   0    4.58    0.26
   3   1   0    4.70    0.25
   3   1   0    5.67    0.44
   3   1   0    5.00    0.29
   3   1   0    5.32    0.37
  -2  -1   0   53.98    2.35
   2   1   0   59.59    2.36
   2   1   0   64.44    2.49
   2   1   0   56.22    2.35
   2   1   0   56.69    2.39
  -1  -1   0    0.15    0.04
   1   1   0    0.07    0.03
   1   1   0    0.10    0.02
   1   1   0    0.10    0.03
   0  -1   0    0.03    0.01
   1  -1   0    0.22    0.03
   1  -1   0    0.16    0.04
   1  -1   0    0.13    0.03
  -1   1   0    0.23    0.05
   2  -1   0   58.87    2.44
   2  -1   0   59.85    2.40
   2  -1   0   63.58    2.53
   2  -1   0   58.57    2.40
  -2   1   0   56.90    2.39
  -2   1   0   59.43    2.44
  -2   1   0   56.80    2.39
   3  -1   0    5.80    0.44
   3  -1   0    5.76    0.30
   3  -1   0    4.76    0.28
   3  -1   0    5.56    0.30
   3  -1   0    5.11    0.38
   3  -1   0    5.09    0.27
   3  -1   0    4.75    0.27
  -3   1   0    4.96    0.27
  -3   1   0    5.07    0.25
  -3   1   0    5.01    0.26
  -3   1   0    5.24    0.30
  -3   1   0    4.96    0.28
  -3   1   0    5.47    0.30
   4  -1   0  178.09    7.45
   4  -1   0  179.89    7.69
   4  -1   0  188.57    7.51
   4  -1   0  185.40    7.48
   4  -1   0  180.86    7.53
   4  -1   0  190.20    7.49
  -4   1   0  181.45    7.44
  -4   1   0  187.23    7.48
  -4   1   0  186.32    7.45
  -4   1   0  191.47    7.53
  -4   1   0  198.30    7.53
  -4   1   0  191.86    7.52
   5  -1   0    3.34    0.26
   5  -1   0    2.51    0.19
   5  -1   0    2.67    0.34
   5  -1   0    3.02    0.24
   5  -1   0    2.69    0.19
   5  -1   0    3.01    0.21
   5  -1   0    3.07    0.23
   5  -1   0    2.53    0.20
   5  -1   0    3.30    0.21
   5  -1   0    3.04    0.21
   5  -1   0    2.95    0.22
   5  -1   0    3.25    0.22
  -5   1   0    3.08    0.23
  -5   1   0    3.09    0.20
  -5   1   0    2.76    0.21
  -5   1   0    2.62    0.25
  -5   1   0    3.22    0.24
  -5   1   0    2.74    0.27
  -5   1   0    3.04    0.22
  -5   1   0    3.08    0.23
   6  -1   0    1.03    0.13
   6  -1   0    1.16    0.12
   6  -1   0    1.33    0.13
   6  -1   0    0.99    0.14
   6  -1   0    1.36    0.13
   6  -1   0    1.20    0.15
  -6   1   0    1.29    0.16
  -6   1   0    1.03    0.11
  -6   1   0    1.19    0.14
  -6  -1  -1    6.50    0.31
  -6  -1  -1    6.30    0.35
  -6  -1  -1    6.43    0.33
   6   1   1    5.89    0.35
   6   1   1    6.37    0.35
   6   1   1    6.16    0.33
   6   1   1    6.48    0.32
   6   1   1    6.62    0.32
  -5  -1  -1    4.12    0.26
  -5  -1  -1    4.10    0.24
  -5  -1  -1    4.09    0.26
  -5  -1  -1    4.39    0.31
   5   1   1    4.16    0.34
   5   1   1    3.21    0.37
   5   1   1    4.27    0.25
   5   1   1    4.12    0.25
   5   1   1    3.76    0.24
   5   1   1    3.75    0.25
   5   1   1    4.01    0.29
   5   1   1    3.44    0.22
  -4  -1  -1    5.40    0.29
  -4  -1  -1    5.32    0.31
  -4  -1  -1    5.73    0.32
  -4  -1  -1    6.07    0.36
  -4  -1  -1    5.93    0.32
   4   1   1    5.78    0.46
   4   1   1    6.06    0.32
   4   1   1    5.49    0.53
   4   1   1    5.05    0.31
  -3  -1  -1    2.84    0.18
  -3  -1  -1    2.64    0.17
  -3  -1  -1    2.92    0.19
  -3  -1  -1    3.06    0.24
  -3  -1  -1    3.10    0.20
  -3  -1  -1    3.16    0.23
   3   1   1    3.03    0.19
   3   1   1    3.22    0.22
   3   1   1    3.01    0.34
   3   1   1    3.10    0.21
   3   1   1    2.91    0.18
   3   1   1    2.93    0.27
   3   1   1    2.79    0.18
  -2  -1  -1  150.07    6.02
  -2  -1  -1  139.75    5.98
   2   1   1  145.19    6.02
   2   1   1  152.45    6.00
   2   1   1  163.40    6.16
   2   1   1  147.75    5.98
  -1  -1  -1  665.34   27.75
  -1  -1  -1  733.13   27.79
  -1  -1  -1  635.28   27.63
   1   1   1  714.72   27.77
   1   1   1  711.75   27.60
   1   1   1  702.09   27.80
   0  -1  -1  272.57   10.96
   1  -1  -1   84.85    3.24
   1  -1  -1   78.97    3.23
   1  -1  -1   84.17    3.26
   1  -1  -1   87.02    3.23
  -1   1   1   74.65    3.23
  -1   1   1   77.23    3.26
   2  -1  -1   11.72    0.55
   2  -1  -1   11.86    0.51
   2  -1  -1   11.12    0.50
   2  -1  -1   11.82    0.50
  -2   1   1   11.42    0.50
  -2   1   1   11.04    0.50
   3  -1  -1  111.38    4.43
   3  -1  -1  111.74    4.42
   3  -1  -1  118.62    4.57
   3  -1  -1  106.48    4.44
   3  -1  -1  111.83    4.46
   3  -1  -1  105.98    4.41
  -3   1   1  110.65    4.44
  -3   1   1  108.65    4.42
  -3   1   1  104.28    4.40
  -3   1   1  110.29    4.44
  -3   1   1  112.59    4.45
   4  -1  -1  132.49    5.36
   4  -1  -1  126.15    5.28
   4  -1  -1  132.97    5.31
   4  -1  -1  133.59    5.33
   4  -1  -1  127.54    5.50
   4  -1  -1  132.37    5.31
  -4   1   1  127.13    5.27
  -4   1   1  135.56    5.34
  -4   1   1  130.94    5.28
  -4   1   1  131.94    5.34
  -4   1   1  137.57    5.35
  -4   1   1  132.22    5.31
   5  -1  -1   14.69    0.67
   5  -1  -1   12.55    0.86
   5  -1  -1   14.37    0.68
   5  -1  -1   15.98    0.71
   5  -1  -1   13.71    0.65
   5  -1  -1   14.70    0.67
   5  -1  -1   15.28    0.70
   5  -1  -1   13.64    0.65
   5  -1  -1   13.35    0.68
   5  -1  -1   15.07    0.68
   5  -1  -1   15.33    0.68
   5  -1  -1   15.50    0.73
   5  -1  -1   13.50    0.64
  -5   1   1   14.95    0.70
  -5   1   1   14.78    0.75
  -5   1   1   15.43    0.74
  -5   1   1   15.50    0.68
  -5   1   1   15.89    0.71
  -5   1   1   14.59    0.69
  -5   1   1   15.03    0.66
   6  -1  -1    2.72    0.18
   6  -1  -1    2.35    0.17
   6  -1  -1    2.86    0.19
   6  -1  -1    3.13    0.20
   6  -1  -1    2.90    0.19
   6  -1  -1    2.87    0.17
   6  -1  -1    2.61    0.19
   6  -1  -1    2.81    0.22
   6  -1  -1    2.85    0.20
  -6   1   1    2.96    0.22
  -6   1   1    2.92    0.27
  -6   1   1    2.71    0.19
  -6  -1  -2    0.84    0.11
  -6  -1  -2    0.87    0.11
   6   1   2    0.81    0.14
   6   1   2    0.93    0.11
   6   1   2    0.84    0.09
   6   1   2    1.00    0.10
   6   1   2    0.75    0.11
  -5  -1  -2   14.93    0.70
  -5  -1  -2   15.40    0.67
  -5  -1  -2   14.50    0.71
  -5  -1  -2   16.16    0.76
   5   1   2   14.94    0.70
   5   1   2   17.18    0.76
   5   1   2   12.43    0.86
   5   1   2   15.23    0.69
   5   1   2   15.24    0.69
   5   1   2   14.93    0.68
  -4  -1  -2    4.94    0.28
  -4  -1  -2    4.47    0.27
  -4  -1  -2    5.00    0.32
  -4  -1  -2    4.05    0.27
   4   1   2    4.49    0.51
   4   1   2    4.68    0.42
   4   1   2    4.65    0.27
  -3  -1  -2    7.85    0.37
  -3  -1  -2    7.25    0.38
  -3  -1  -2    7.70    0.40
  -3  -1  -2    7.74    0.38
   3   1   2    7.80    0.60
   3   1   2    7.51    0.37
   3   1   2    8.17    0.51
   3   1   2    7.64    0.42
  -2  -1  -2    0.73    0.10
  -2  -1  -2    0.80    0.09
  -2  -1  -2    0.80    0.09
   2   1   2    0.68    0.08
   2   1   2    0.79    0.19
   2   1   2    0.88    0.12
  -1  -1  -2   48.92    1.99
  -1  -1  -2   48.01    1.99
  -1  -1  -2   52.23    2.01
  -1  -1  -2   47.11    2.00
   1   1   2   43.62    1.99
   1   1   2   52.18    2.02
   1   1   2   54.78    2.13
   1   1   2   50.29    1.99
   0  -1  -2  585.57   23.27
   0   1   2  568.26   23.21
   0   1   2  588.50   23.31
   1  -1  -2   48.66    1.95
   1  -1  -2   49.52    1.94
   1  -1  -2   47.09    1.93
  -1   1   2   46.93    1.94
   2  -1  -2  634.61   25.11
   2  -1  -2  657.15   25.20
   2  -1  -2  690.42   25.37
  -2   1   2  538.32   25.09
  -2   1   2  639.64   25.18
   3  -1  -2   11.89    0.54
   3  -1  -2   12.03    0.53
   3  -1  -2   12.06    0.56
   3  -1  -2   11.21    0.52
   3  -1  -2   11.76    0.54
   3  -1  -2   11.58    0.52
   3  -1  -2   12.94    0.65
  -3   1   2   11.53    0.54
  -3   1   2   11.24    0.52
  -3   1   2   11.28    0.50
  -3   1   2   10.87    0.52
  -3   1   2   11.56    0.53
   4  -1  -2   12.16    0.56
   4  -1  -2   12.27    0.58
   4  -1  -2   11.84    0.72
   4  -1  -2   11.96    0.57
   4  -1  -2   12.34    0.60
   4  -1  -2   11.89    0.62
  -4   1   2   11.82    0.54
  -4   1   2   13.28    0.61
  -4   1   2   12.13    0.57
  -4   1   2   12.49    0.61
  -4   1   2   11.48    0.53
  -4   1   2   11.64    0.60
   5  -1  -2    6.67    0.35
   5  -1  -2    7.09    0.36
   5  -1  -2    6.73    0.38
   5  -1  -2    6.66    0.36
   5  -1  -2    6.50    0.53
   5  -1  -2    7.18    0.40
   5  -1  -2    6.90    0.37
   5  -1  -2    7.05    0.38
   5  -1  -2    7.90    0.38
   5  -1  -2    7.54    0.40
   5  -1  -2    7.53    0.42
   5  -1  -2    7.21    0.38
   5  -1  -2    7.21    0.40
  -5   1   2    6.83    0.43
  -5   1   2    7.31    0.40
  -5   1   2    7.81    0.36
  -5   1   2    6.99    0.38
  -5   1   2    7.35    0.43
   6  -1  -2   27.33    1.20
   6  -1  -2   27.92    1.18
   6  -1  -2   26.30    1.22
   6  -1  -2   28.68    1.20
   6  -1  -2   27.97    1.21
   6  -1  -2   28.97    1.19
   6  -1  -2   29.14    1.20
   6  -1  -2   28.34    1.18
   6  -1  -2   28.04    1.17
  -6   1   2   27.78    1.22
  -6   1   2   29.35    1.21
  -6   1   2   29.31    1.22
  -6   1   2   28.28    1.19
  -6  -1  -3   -0.01    0.10
  -6  -1  -3    0.07    0.05
   6   1   3   -0.02    0.04
   6   1   3   -0.01    0.08
   6   1   3   -0.02    0.04
  -5  -1  -3    3.49    0.22
  -5  -1  -3    3.56    0.27
  -5  -1  -3    3.47    0.24
   5   1   3    3.06    0.22
   5   1   3    4.31    0.29
   5   1   3    3.45    0.23
   5   1   3    3.82    0.24
   5   1   3    3.61    0.22
  -4  -1  -3    0.03    0.08
  -4  -1  -3    0.10    0.06
  -4  -1  -3    0.16    0.07
   4   1   3    0.01    0.06
   4   1   3   -0.04    0.13
   4   1   3    0.05    0.12
  -3  -1  -3   60.69    2.50
  -3  -1  -3   62.30    2.54
   3   1   3   60.48    2.87
   3   1   3   56.34    2.57
   3   1   3   66.53    2.70
  -2  -1  -3   11.51    0.52
  -2  -1  -3   11.58    0.54
  -2  -1  -3   10.66    0.52
  -2  -1  -3   11.52    0.51
   2   1   3   10.95    0.60
   2   1   3   11.62    0.73
   2   1   3   13.69    0.63
   2   1   3   12.62    0.58
  -1  -1  -3    0.56    0.07
  -1  -1  -3    0.32    0.05
   1   1   3    0.36    0.11
   1   1   3    0.31    0.06
   1   1   3    0.32    0.06
   0  -1  -3  134.44    5.54
   0  -1  -3  146.32    5.55
   0   1   3  134.78    5.53
   0   1   3  140.33    5.55
   1  -1  -3    3.26    0.18
   1  -1  -3    3.44    0.18
   1  -1  -3    3.24    0.17
   1  -1  -3    3.10    0.16
  -1   1   3    3.26    0.18
   2  -1  -3   74.91    3.09
   2  -1  -3   79.24    3.09
   2  -1  -3   76.42    3.14
  -2   1   3   75.88    3.09
   3  -1  -3   68.44    2.66
   3  -1  -3   66.41    2.64
   3  -1  -3   67.12    2.64
   3  -1  -3   60.75    2.62
   3  -1  -3   64.74    2.65
   3  -1  -3   64.35    2.63
   3  -1  -3   67.70    2.68
  -3   1   3   63.79    2.62
  -3   1   3   64.09    2.64
  -3   1   3   63.91    2.63
  -3   1   3   64.12    2.64
  -3   1   3   67.25    2.66
  -3   1   3   62.80    2.61
   4  -1  -3    8.43    0.40
   4  -1  -3    8.22    0.41
   4  -1  -3    7.87    0.39
   4  -1  -3    7.66    0.42
   4  -1  -3    7.64    0.44
   4  -1  -3    8.40    0.43
   4  -1  -3    7.79    0.40
  -4   1   3    7.78    0.37
  -4   1   3    7.54    0.43
  -4   1   3    7.99    0.43
  -4   1   3    7.76    0.43
  -4   1   3    7.67    0.40
  -4   1   3    7.44    0.36
   5  -1  -3    8.81    0.49
   5  -1  -3    9.77    0.49
   5  -1  -3   10.29    0.48
   5  -1  -3    8.71    0.44
   5  -1  -3   10.03    0.47
   5  -1  -3    9.80    0.48
   5  -1  -3    8.79    0.45
   5  -1  -3    9.83    0.50
   5  -1  -3    9.12    0.47
   5  -1  -3    9.55    0.51
   5  -1  -3    9.24    0.45
  -5   1   3    9.64    0.48
  -5   1   3    9.87    0.52
  -5   1   3    9.88    0.48
  -5   1   3    9.78    0.49
  -5   1   3    9.98    0.45
  -5   1   3    8.52    0.51
   6  -1  -3    4.76    0.25
   6  -1  -3    4.42    0.28
   6  -1  -3    4.53    0.29
   6  -1  -3    4.74    0.26
   6  -1  -3    4.77    0.24
   6  -1  -3    4.86    0.27
   6  -1  -3    3.99    0.26
   6  -1  -3    4.67    0.25
   6  -1  -3    4.31    0.27
  -6   1   3    4.60    0.34
  -6   1   3    4.70    0.26
  -6   1   3    4.91    0.29
  -6   1   3    4.64    0.26
  -6   1   3    4.68    0.31
  -5  -1  -4    1.51    0.17
  -5  -1  -4    1.60    0.15
  -5  -1  -4    1.07    0.13
   5   1   4    1.16    0.13
   5   1   4    1.39    0.15
   5   1   4    1.92    0.19
   5   1   4    1.25    0.13
  -4  -1  -4    0.14    0.10
  -4  -1  -4    0.16    0.07
  -4  -1  -4    0.09    0.07
  -4  -1  -4    0.03    0.08
   4   1   4    0.06    0.09
   4   1   4    0.05    0.05
   4   1   4    0.05    0.07
   4   1   4    0.11    0.07
   4   1   4    0.07    0.08
  -3  -1  -4    5.46    0.32
  -3  -1  -4    5.31    0.29
   3   1   4    4.50    0.51
  -2  -1  -4    0.07    0.06
  -2  -1  -4    0.12    0.05
   2   1   4    0.00    0.09
   2   1   4    0.08    0.10
   2   1   4    0.05    0.06
  -1  -1  -4   42.90    1.76
  -1  -1  -4   41.90    1.77
   1   1   4   40.58    1.77
   1   1   4   45.86    1.80
   1   1   4   45.95    1.97
   1   1   4   42.27    1.82
   0  -1  -4   33.44    1.38
   0   1   4   32.10    1.38
   0   1   4   34.04    1.38
   0   1   4   33.76    1.40
   0   1   4   34.22    1.48
   1  -1  -4  182.16    7.56
   1  -1  -4  182.07    7.53
   1  -1  -4  191.49    7.54
  -1   1   4  195.63    7.54
  -1   1   4  195.24    7.56
   2  -1  -4    3.36    0.19
   2  -1  -4    3.42    0.18
   2  -1  -4    2.88    0.19
   2  -1  -4    3.06    0.21
   2  -1  -4    3.26    0.19
   2  -1  -4    3.03    0.18
   2  -1  -4    3.39    0.19
   2  -1  -4    3.16    0.18
  -2   1   4    2.52    0.16
  -2   1   4    3.14    0.19
  -2   1   4    2.62    0.16
   3  -1  -4   26.60    1.11
   3  -1  -4   26.12    1.09
   3  -1  -4   26.16    1.09
   3  -1  -4   26.40    1.11
   3  -1  -4   26.15    1.13
   3  -1  -4   26.06    1.08
   3  -1  -4   26.03    1.09
  -3   1   4   23.97    1.08
  -3   1   4   25.10    1.08
  -3   1   4   25.71    1.09
   4  -1  -4   13.60    0.63
   4  -1  -4   12.80    0.59
   4  -1  -4   12.45    0.59
   4  -1  -4   13.61    0.63
   4  -1  -4   11.98    0.61
   4  -1  -4   12.94    0.59
   4  -1  -4   13.16    0.60
  -4   1   4   12.58    0.57
  -4   1   4   11.75    0.61
  -4   1   4   12.72    0.60
  -4   1   4   12.54    0.62
  -4   1   4   12.27    0.56
  -4   1   4   13.63    0.63
   5  -1  -4   33.98    1.47
   5  -1  -4   36.42    1.50
   5  -1  -4   35.29    1.49
   5  -1  -4   34.36    1.45
   5  -1  -4   35.36    1.52
   5  -1  -4   36.10    1.48
   5  -1  -4   35.62    1.48
   5  -1  -4   32.15    1.51
   5  -1  -4   35.64    1.51
   5  -1  -4   33.33    1.44
   5  -1  -4   34.98    1.46
   5  -1  -4   33.04    1.45
  -5   1   4   34.62    1.49
  -5   1   4   36.68    1.53
  -5   1   4   37.25    1.48
  -5   1   4   34.04    1.48
  -5   1   4   32.65    1.53
   6  -1  -4   16.41    0.69
   6  -1  -4   15.55    0.67
   6  -1  -4   14.92    0.67
   6  -1  -4   15.48    0.66
   6  -1  -4   14.74    0.69
   6  -1  -4   14.32    0.69
   6  -1  -4   14.19    0.70
   6  -1  -4   15.82    0.67
  -6   1   4   15.17    0.72
  -6   1   4   15.17    0.67
  -6   1   4   15.34    0.70
  -6   1   4   15.61    0.70
  -5  -1  -5    0.88    0.11
  -5  -1  -5    1.19    0.14
  -5  -1  -5    1.21    0.12
   5   1   5    1.45    0.12
   5   1   5    1.24    0.15
   5   1   5    0.96    0.13
  -4  -1  -5    0.13    0.08
  -4  -1  -5    0.15    0.08
  -4  -1  -5    0.10    0.07
  -4  -1  -5    0.04    0.08
   4   1   5    0.14    0.06
   4   1   5   -0.02    0.06
   4   1   5    0.14    0.07
   4   1   5    0.05    0.08
  -3  -1  -5   10.68    0.49
  -3  -1  -5    9.44    0.51
  -3  -1  -5    9.68    0.48
   3   1   5    9.33    0.47
  -2  -1  -5    0.24    0.07
  -2  -1  -5    0.18    0.07
   2   1   5    0.12    0.12
   2   1   5    0.07    0.10
   2   1   5    0.10    0.07
  -1  -1  -5    4.19    0.24
  -1  -1  -5    3.99    0.23
  -1  -1  -5    3.97    0.23
  -1  -1  -5    4.05    0.21
  -1  -1  -5    3.86    0.23
   1   1   5    4.27    0.30
   1   1   5    3.87    0.26
   1   1   5    3.92    0.38
   1   1   5    3.95    0.25
   0  -1  -5   20.19    0.85
   0  -1  -5   19.33    0.86
   0  -1  -5   19.66    0.84
   0  -1  -5   20.01    0.84
   0  -1  -5   19.28    0.85
   0  -1  -5   20.44    0.87
   0   1   5   19.84    0.87
   0   1   5   21.67    0.89
   0   1   5   20.67    0.88
   0   1   5   19.98    0.87
   0   1   5   19.75    0.91
   1  -1  -5  251.32    9.77
   1  -1  -5  241.16    9.76
   1  -1  -5  246.56    9.78
   1  -1  -5  241.41    9.76
   1  -1  -5  247.51    9.78
   1  -1  -5  246.16    9.76
  -1   1   5  243.44    9.78
  -1   1   5  250.25    9.78
  -1   1   5  240.69    9.81
  -1   1   5  257.60    9.81
  -1   1   5  234.66    9.79
   2  -1  -5    2.73    0.17
   2  -1  -5    2.31    0.16
   2  -1  -5    2.34    0.16
   2  -1  -5    2.34    0.16
   2  -1  -5    2.12    0.20
   2  -1  -5    2.35    0.16
   2  -1  -5    2.51    0.15
  -2   1   5    2.19    0.15
  -2   1   5    2.48    0.18
  -2   1   5    2.40    0.16
  -2   1   5    2.21    0.15
  -2   1   5    2.34    0.14
   3  -1  -5  130.34    5.65
   3  -1  -5  140.04    5.62
   3  -1  -5  143.35    5.61
   3  -1  -5  135.78    5.61
   3  -1  -5  145.37    5.65
   3  -1  -5  144.79    5.63
   3  -1  -5  139.40    5.62
   3  -1  -5  142.26    5.64
  -3   1   5  144.41    5.64
  -3   1   5  142.23    5.61
  -3   1   5  139.95    5.62
  -3   1   5  140.56    5.63
  -3   1   5  133.88    5.59
   4  -1  -5    3.46    0.23
   4  -1  -5    3.26    0.22
   4  -1  -5    3.42    0.21
   4  -1  -5    3.12    0.22
   4  -1  -5    3.31    0.24
   4  -1  -5    3.29    0.22
   4  -1  -5    3.47    0.23
   4  -1  -5    3.73    0.25
  -4   1   5    3.32    0.23
  -4   1   5    3.73    0.26
  -4   1   5    3.36    0.22
  -4   1   5    3.55    0.25
  -4   1   5    3.29    0.21
  -4   1   5    3.18    0.24
  -4   1   5    3.22    0.20
   5  -1  -5   12.03    0.57
   5  -1  -5   11.75    0.57
   5  -1  -5   10.45    0.57
   5  -1  -5   11.90    0.56
   5  -1  -5   11.80    0.60
   5  -1  -5   11.35    0.54
   5  -1  -5   11.65    0.53
   5  -1  -5   11.82    0.53
   5  -1  -5   11.17    0.55
   5  -1  -5   12.03    0.59
   5  -1  -5   12.08    0.57
   5  -1  -5   11.60    0.60
  -5   1   5   12.05    0.57
  -5   1   5   11.87    0.54
  -5   1   5   10.97    0.60
  -5   1   5   11.49    0.57
  -5   1   5   11.39    0.56
  -5   1   5   11.45    0.57
   6  -1  -5    1.05    0.11
   6  -1  -5    0.97    0.10
   6  -1  -5    1.16    0.13
   6  -1  -5    1.16    0.11
   6  -1  -5    0.84    0.11
   6  -1  -5    0.92    0.11
   6  -1  -5    1.13    0.15
  -6   1   5    1.19    0.13
  -5  -1  -6    8.63    0.44
  -5  -1  -6    8.74    0.42
   5   1   6   10.22    0.41
  -4  -1  -6   12.02    0.64
  -4  -1  -6   13.47    0.64
  -4  -1  -6   14.09    0.63
   4   1   6   13.79    0.61
   4   1   6   13.54    0.65
   4   1   6   13.98    0.62
   4   1   6   12.43    0.61
  -3  -1  -6    4.63    0.28
  -3  -1  -6    4.08    0.26
  -3  -1  -6    4.89    0.28
  -3  -1  -6    3.95    0.26
  -3  -1  -6    4.88    0.30
   3   1   6    4.11    0.27
   3   1   6    4.59    0.30
   3   1   6    4.90    0.28
   3   1   6    4.64    0.27
  -2  -1  -6    3.54    0.22
  -2  -1  -6    3.46    0.24
  -2  -1  -6    3.72    0.26
  -2  -1  -6    4.03    0.23
   2   1   6    4.04    0.31
   2   1   6    3.48    0.22
   2   1   6    3.12    0.41
  -1  -1  -6   70.86    2.84
  -1  -1  -6   69.84    2.86
   1   1   6   68.34    2.86
   1   1   6   69.77    2.94
   0  -1  -6    2.19    0.17
   0  -1  -6    2.53    0.18
   0  -1  -6    2.43    0.17
   0  -1  -6    2.18    0.15
   0  -1  -6    2.35    0.14
   0  -1  -6    2.67    0.17
   0   1   6    2.31    0.20
   0   1   6    2.51    0.19
   0   1   6    2.08    0.20
   0   1   6    2.11    0.16
   0   1   6    2.28    0.19
   0   1   6    2.67    0.20
   1  -1  -6   10.63    0.50
   1  -1  -6   11.60    0.53
   1  -1  -6   10.83    0.50
   1  -1  -6   11.00    0.52
   1  -1  -6   10.40    0.49
   1  -1  -6   10.27    0.49
  -1   1   6   11.75    0.53
  -1   1   6   10.16    0.55
  -1   1   6   10.92    0.53
  -1   1   6   11.28    0.51
  -1   1   6   11.17    0.52
  -1   1   6   11.72    0.56
   2  -1  -6   57.84    2.31
   2  -1  -6   56.28    2.32
   2  -1  -6   57.92    2.33
   2  -1  -6   57.50    2.30
   2  -1  -6   56.95    2.30
   2  -1  -6   57.14    2.30
  -2   1   6   54.88    2.30
  -2   1   6   52.15    2.31
  -2   1   6   57.14    2.36
  -2   1   6   54.47    2.29
  -2   1   6   56.07    2.32
  -2   1   6   58.29    2.33
   3  -1  -6  110.87    4.85
   3  -1  -6  120.25    4.80
   3  -1  -6  120.71    4.80
   3  -1  -6  120.19    4.79
   3  -1  -6  120.44    4.81
   3  -1  -6  120.73    4.83
  -3   1   6  112.32    4.78
  -3   1   6  121.24    4.80
  -3   1   6  118.41    4.82
  -3   1   6  117.17    4.79
  -3   1   6  129.11    4.83
   4  -1  -6   20.18    0.89
   4  -1  -6   20.13    0.87
   4  -1  -6   19.17    0.86
   4  -1  -6   20.19    0.91
   4  -1  -6   20.27    0.88
   4  -1  -6   18.50    0.90
   4  -1  -6   20.49    0.88
   4  -1  -6   20.48    0.88
  -4   1   6   19.33    0.87
  -4   1   6   20.58    0.93
  -4   1   6   20.89    0.89
  -4   1   6   19.12    0.90
  -4   1   6   18.19    0.90
  -4   1   6   19.36    0.87
  -4   1   6   18.12    0.85
  -4   1   6   19.22    0.87
   5  -1  -6    1.89    0.16
   5  -1  -6    2.59    0.17
   5  -1  -6    2.24    0.19
   5  -1  -6    2.52    0.19
   5  -1  -6    2.51    0.19
   5  -1  -6    2.33    0.17
   5  -1  -6    1.87    0.20
   5  -1  -6    2.18    0.18
   5  -1  -6    2.34    0.20
   5  -1  -6    2.59    0.23
   5  -1  -6    2.08    0.18
   5  -1  -6    2.10    0.20
  -5   1   6    2.25    0.21
  -5   1   6    2.38    0.20
  -5   1   6    2.27    0.18
  -5   1   6    1.79    0.22
  -5   1   6    2.64    0.26
  -5   1   6    2.41    0.21
   6  -1  -6    0.09    0.09
   6  -1  -6    0.06    0.05
   6  -1  -6    0.15    0.05
   6  -1  -6    0.02    0.06
   6  -1  -6    0.01    0.11
   6  -1  -6    0.07    0.06
   6  -1  -6    0.03    0.06
  -6   1   6    0.13    0.08
  -6   1   6    0.13    0.07
  -4  -1  -7    7.45    0.38
   4   1   7    6.93    0.37
   4   1   7    6.86    0.34
  -3  -1  -7    0.42    0.09
  -3  -1  -7    0.45    0.09
  -3  -1  -7    0.57    0.11
  -3  -1  -7    0.41    0.10
   3   1   7    0.54    0.09
   3   1   7    0.53    0.10
   3   1   7    0.52    0.10
  -2  -1  -7    0.76    0.11
  -2  -1  -7    0.56    0.12
   2   1   7    0.45    0.16
   2   1   7    0.54    0.09
  -1  -1  -7    0.00    0.05
  -1  -1  -7   -0.02    0.05
  -1  -1  -7    0.13    0.07
   1   1   7    0.17    0.11
   1   1   7    0.10    0.07
   1   1   7    0.04    0.07
   0  -1  -7   49.54    2.00
   0  -1  -7   48.88    2.03
   0  -1  -7   46.09    2.00
   0  -1  -7   50.60    1.99
   0   1   7   47.32    2.07
   0   1   7   47.51    2.00
   0   1   7   47.67    2.01
   0   1   7   48.10    2.11
   0   1   7   51.18    2.05
   1  -1  -7   30.73    1.33
   1  -1  -7   31.61    1.34
   1  -1  -7   32.53    1.35
   1  -1  -7   31.29    1.37
   1  -1  -7   31.63    1.35
   1  -1  -7   31.24    1.37
  -1   1   7   31.81    1.42
  -1   1   7   33.65    1.40
  -1   1   7   32.57    1.35
  -1   1   7   33.05    1.39
  -1   1   7   31.63    1.38
  -1   1   7   31.53    1.42
  -1   1   7   32.93    1.36
   2  -1  -7    8.41    0.42
   2  -1  -7    8.71    0.42
   2  -1  -7    8.58    0.44
   2  -1  -7    8.68    0.41
   2  -1  -7    8.32    0.42
  -2   1   7    8.46    0.44
  -2   1   7    8.11    0.42
  -2   1   7    8.31    0.48
  -2   1   7    8.67    0.43
  -2   1   7    8.60    0.45
  -2   1   7    8.44    0.44
   3  -1  -7   37.04    1.58
   3  -1  -7   37.67    1.56
   3  -1  -7   37.10    1.58
   3  -1  -7   36.66    1.60
   3  -1  -7   37.87    1.57
   3  -1  -7   36.45    1.57
  -3   1   7   37.75    1.58
  -3   1   7   38.71    1.60
  -3   1   7   36.48    1.57
  -3   1   7   36.65    1.56
  -3   1   7   38.52    1.61
   4  -1  -7    1.90    0.19
   4  -1  -7    1.52    0.16
   4  -1  -7    1.45    0.15
   4  -1  -7    1.14    0.14
   4  -1  -7    1.58    0.14
   4  -1  -7    1.50    0.16
   4  -1  -7    1.49    0.17
   4  -1  -7    1.58    0.19
   4  -1  -7    1.57    0.16
   4  -1  -7    1.58    0.19
   4  -1  -7    1.77    0.18
  -4   1   7    1.84    0.17
  -4   1   7    1.61    0.18
  -4   1   7    1.64    0.15
  -4   1   7    1.36    0.15
  -4   1   7    1.43    0.17
  -4   1   7    1.48    0.17
  -4   1   7    1.48    0.18
   5  -1  -7   13.51    0.60
   5  -1  -7   13.35    0.66
   5  -1  -7   13.53    0.64
   5  -1  -7   13.81    0.61
   5  -1  -7   12.53    0.58
   5  -1  -7   12.12    0.63
   5  -1  -7   13.53    0.62
   5  -1  -7   13.85    0.58
  -5   1   7   13.19    0.64
  -5   1   7   12.05    0.66
  -5   1   7   13.39    0.61
  -5   1   7   13.15    0.61
   6  -1  -7    0.38    0.07
   6  -1  -7    0.35    0.08
   6  -1  -7    0.30    0.13
   6  -1  -7    0.49    0.08
   6  -1  -7    0.23    0.10
   6  -1  -7    0.29    0.08
   6  -1  -7    0.39    0.08
  -6   1   7    0.39    0.09
  -6   1   7    0.36    0.08
  -4  -1  -8    0.39    0.10
  -4  -1  -8    0.33    0.09
   4   1   8    0.43    0.06
  -3  -1  -8    2.72    0.24
  -3  -1  -8    2.58    0.19
  -3  -1  -8    2.69    0.20
   3   1   8    2.72    0.21
   3   1   8    3.00    0.20
  -2  -1  -8   19.51    1.07
  -2  -1  -8   23.70    1.00
  -2  -1  -8   22.69    0.98
  -2  -1  -8   22.97    0.99
  -2  -1  -8   21.45    0.99
   2   1   8   23.16    0.99
   2   1   8   23.06    0.98
   2   1   8   23.49    1.03
   2   1   8   23.05    1.14
  -1  -1  -8    1.35    0.17
  -1  -1  -8    1.59    0.16
  -1  -1  -8    1.68    0.16
   1   1   8    1.57    0.15
   1   1   8    1.81    0.24
   1   1   8    1.33    0.22
   0  -1  -8   24.76    1.06
   0  -1  -8   23.74    1.09
   0  -1  -8   25.22    1.06
   0   1   8   25.35    1.12
   0   1   8   23.83    1.09
   0   1   8   23.99    1.18
   1  -1  -8   23.61    1.03
   1  -1  -8   22.78    0.99
   1  -1  -8   22.56    0.97
   1  -1  -8   22.22    0.98
   1  -1  -8   23.43    0.99
   1  -1  -8   21.33    0.98
  -1   1   8   22.35    1.00
  -1   1   8   22.39    1.03
  -1   1   8   22.63    0.99
  -1   1   8   22.03    1.04
  -1   1   8   22.78    1.03
  -1   1   8   22.21    1.08
  -1   1   8   23.44    1.04
   2  -1  -8    8.45    0.43
   2  -1  -8    7.95    0.42
   2  -1  -8    7.69    0.43
   2  -1  -8    8.62    0.43
   2  -1  -8    8.01    0.45
   2  -1  -8    8.58    0.42
  -2   1   8    8.62    0.43
  -2   1   8    7.91    0.44
  -2   1   8    7.77    0.45
  -2   1   8    8.85    0.48
  -2   1   8    8.49    0.43
  -2   1   8    9.15    0.47
  -2   1   8    8.78    0.47
   3  -1  -8    0.24    0.09
   3  -1  -8    0.31    0.08
   3  -1  -8    0.01    0.13
   3  -1  -8    0.20    0.07
   3  -1  -8    0.27    0.08
   3  -1  -8    0.21    0.08
  -3   1   8    0.32    0.09
  -3   1   8    0.16    0.08
  -3   1   8    0.25    0.10
  -3   1   8    0.21    0.10
  -3   1   8    0.18    0.10
  -3   1   8    0.17    0.10
   4  -1  -8    0.20    0.07
   4  -1  -8    0.17    0.08
   4  -1  -8    0.14    0.09
   4  -1  -8    0.07    0.07
   4  -1  -8    0.19    0.09
   4  -1  -8    0.07    0.08
   4  -1  -8    0.14    0.08
   4  -1  -8    0.12    0.08
   4  -1  -8    0.11    0.07
   4  -1  -8    0.11    0.08
   4  -1  -8   -0.03    0.06
  -4   1   8    0.15    0.10
  -4   1   8    0.05    0.08
  -4   1   8    0.09    0.08
  -4   1   8    0.15    0.14
  -4   1   8    0.10    0.09
  -4   1   8    0.36    0.09
   5  -1  -8    0.71    0.11
   5  -1  -8    0.56    0.10
   5  -1  -8    0.51    0.11
   5  -1  -8    0.60    0.10
   5  -1  -8    0.60    0.11
   5  -1  -8    0.79    0.10
   5  -1  -8    0.58    0.08
  -5   1   8    0.59    0.13
  -5   1   8    0.60    0.16
   6  -1  -8   24.58    0.98
   6  -1  -8   25.04    0.99
   6  -1  -8   23.12    1.01
   6  -1  -8   23.01    1.00
  -6   1   8   23.51    0.99
  -3  -1  -9   11.59    0.57
  -3  -1  -9   13.65    0.57
   3   1   9   13.45    0.57
  -2  -1  -9   27.23    1.15
  -2  -1  -9   28.11    1.17
   2   1   9   27.94    1.17
   2   1   9   26.35    1.16
  -1  -1  -9   24.99    1.12
  -1  -1  -9   27.30    1.13
  -1  -1  -9   26.57    1.13
  -1  -1  -9   25.00    1.14
  -1  -1  -9   27.68    1.14
  -1  -1  -9   26.56    1.14
   1   1   9   26.76    1.14
   1   1   9   26.90    1.13
   1   1   9   26.82    1.16
   1   1   9   26.63    1.29
   1   1   9   25.29    1.12
   0  -1  -9    0.83    0.12
   0  -1  -9    0.99    0.14
   0  -1  -9    1.00    0.13
   0  -1  -9    0.59    0.10
   0  -1  -9    0.81    0.14
   0  -1  -9    0.66    0.11
   0  -1  -9    0.78    0.12
   0   1   9    1.03    0.13
   0   1   9    0.71    0.14
   0   1   9    0.67    0.12
   0   1   9    0.48    0.13
   0   1   9    0.65    0.18
   0   1   9    0.95    0.13
   1  -1  -9    0.00    0.09
   1  -1  -9    0.10    0.10
   1  -1  -9    0.41    0.14
   1  -1  -9    0.11    0.07
   1  -1  -9    0.04    0.07
   1  -1  -9   -0.01    0.09
   1  -1  -9   -0.01    0.06
  -1   1   9   -0.02    0.11
  -1   1   9    0.02    0.08
  -1   1   9    0.03    0.12
  -1   1   9    0.00    0.09
  -1   1   9    0.06    0.08
   2  -1  -9    3.22    0.25
   2  -1  -9    2.40    0.20
   2  -1  -9    2.72    0.23
   2  -1  -9    2.87    0.22
   2  -1  -9    2.64    0.20
   2  -1  -9    2.67    0.20
   2  -1  -9    2.33    0.20
   2  -1  -9    2.90    0.24
   2  -1  -9    3.00    0.24
   2  -1  -9    2.56    0.21
   2  -1  -9    2.71    0.21
   2  -1  -9    2.78    0.21
  -2   1   9    2.85    0.25
  -2   1   9    2.59    0.25
  -2   1   9    2.62    0.25
  -2   1   9    2.69    0.25
  -2   1   9    2.85    0.23
  -2   1   9    2.67    0.25
  -2   1   9    2.92    0.21
   3  -1  -9    3.13    0.24
   3  -1  -9    4.14    0.25
   3  -1  -9    3.98    0.29
   3  -1  -9    3.68    0.25
   3  -1  -9    3.26    0.23
   3  -1  -9    3.69    0.24
   3  -1  -9    3.98    0.27
   3  -1  -9    4.22    0.29
   3  -1  -9    4.29    0.27
   3  -1  -9    3.90    0.26
   3  -1  -9    3.97    0.25
  -3   1   9    3.84    0.26
  -3   1   9    3.79    0.31
  -3   1   9    3.44    0.27
  -3   1   9    4.00    0.26
  -3   1   9    3.66    0.28
   4  -1  -9    6.48    0.37
   4  -1  -9    6.12    0.31
   4  -1  -9    6.17    0.37
   4  -1  -9    6.78    0.37
   4  -1  -9    6.63    0.39
   4  -1  -9    6.23    0.35
   4  -1  -9    6.74    0.33
   4  -1  -9    6.43    0.35
  -4   1   9    6.40    0.38
  -4   1   9    6.19    0.37
  -4   1   9    5.90    0.43
   5  -1  -9   10.76    0.47
   5  -1  -9    9.83    0.51
   5  -1  -9   10.17    0.49
   5  -1  -9   10.09    0.45
   5  -1  -9   10.22    0.48
   5  -1  -9    9.79    0.48
   5  -1  -9   10.35    0.46
  -5   1   9   10.20    0.48
  -5   1   9   10.45    0.50
  -2  -1 -10   12.47    0.56
  -2  -1 -10   13.21    0.58
   2   1  10   13.15    0.58
   2   1  10   12.84    0.63
  -1  -1 -10    1.91    0.16
  -1  -1 -10    1.74    0.15
  -1  -1 -10    1.97    0.15
   1   1  10    1.94    0.16
   1   1  10    2.03    0.15
   1   1  10    1.69    0.17
   0  -1 -10   29.99    1.28
   0  -1 -10   30.75    1.30
   0  -1 -10   30.11    1.29
   0  -1 -10   28.35    1.30
   0  -1 -10   31.79    1.29
   0  -1 -10   30.92    1.31
   0   1  10   28.95    1.29
   0   1  10   30.77    1.30
   0   1  10   32.44    1.31
   0   1  10   30.83    1.28
   1  -1 -10    0.08    0.08
   1  -1 -10    0.11    0.07
   1  -1 -10   -0.04    0.08
   1  -1 -10   -0.06    0.07
   1  -1 -10    0.08    0.07
   1  -1 -10    0.06    0.07
   1  -1 -10   -0.02    0.07
   1  -1 -10    0.04    0.06
  -1   1  10    0.05    0.10
  -1   1  10    0.12    0.09
  -1   1  10   -0.01    0.08
  -1   1  10    0.05    0.09
   2  -1 -10    0.74    0.11
   2  -1 -10    0.72    0.13
   2  -1 -10    0.63    0.12
   2  -1 -10    0.92    0.13
   2  -1 -10    0.85    0.13
   2  -1 -10    0.66    0.13
   2  -1 -10    0.65    0.11
   2  -1 -10    0.66    0.13
  -2   1  10    0.84    0.15
  -2   1  10    0.85    0.17
  -2   1  10    0.77    0.16
  -2   1  10    0.86    0.22
   3  -1 -10    0.11    0.08
   3  -1 -10    0.15    0.09
   3  -1 -10    0.23    0.07
   3  -1 -10    0.17    0.08
   3  -1 -10    0.15    0.07
   3  -1 -10    0.23    0.09
   3  -1 -10    0.27    0.09
   3  -1 -10    0.25    0.09
  -3   1  10    0.27    0.15
  -3   1  10    0.14    0.29
  -3   1  10    0.27    0.12
  -3   1  10    0.15    0.10
   4  -1 -10    3.29    0.21
   4  -1 -10    3.56    0.21
   4  -1 -10    3.13    0.23
   4  -1 -10    3.31    0.21
   4  -1 -10    3.29    0.21
   4  -1 -10    3.11    0.24
   4  -1 -10    3.30    0.23
   4  -1 -10    3.39    0.23
  -4   1  10    3.37    0.25
  -4   1  10    3.25    0.22
  -4   1  10    3.89    0.24
   5  -1 -10    0.07    0.04
   5  -1 -10    0.07    0.05
   5  -1 -10    0.10    0.10
   5  -1 -10    0.07    0.05
   5  -1 -10    0.11    0.07
   5  -1 -10    0.12    0.09
  -5   1  10    0.09    0.05
  -5   1  10    0.11    0.05
  -1  -1 -11    0.23    0.06
  -1  -1 -11    0.10    0.08
   1   1  11    0.21    0.07
   0  -1 -11    0.19    0.06
   0  -1 -11    0.25    0.07
   0  -1 -11    0.16    0.07
   0  -1 -11    0.17    0.07
   0   1  11    0.23    0.06
   0   1  11    0.21    0.11
   0   1  11    0.23    0.07
   1  -1 -11   10.26    0.47
   1  -1 -11   10.27    0.49
   1  -1 -11   10.12    0.47
   1  -1 -11   10.23    0.50
   1  -1 -11   10.44    0.51
   1  -1 -11    9.72    0.48
   1  -1 -11    9.79    0.48
  -1   1  11   11.15    0.49
  -1   1  11    9.96    0.50
  -1   1  11   10.01    0.47
  -1   1  11   10.52    0.49
   2  -1 -11    1.92    0.18
   2  -1 -11    2.07    0.17
   2  -1 -11    2.33    0.17
   2  -1 -11    1.85    0.15
   2  -1 -11    2.01    0.15
   2  -1 -11    2.01    0.17
   2  -1 -11    2.09    0.17
  -2   1  11    1.85    0.16
  -2   1  11    1.97    0.18
  -2   1  11    1.93    0.25
   3  -1 -11    2.48    0.18
   3  -1 -11    2.68    0.19
   3  -1 -11    2.54    0.20
   3  -1 -11    2.80    0.18
   3  -1 -11    2.58    0.18
   3  -1 -11    2.83    0.18
   3  -1 -11    2.56    0.19
   3  -1 -11    2.92    0.21
  -3   1  11    2.72    0.17
  -3   1  11    2.67    0.20
  -3   1  11    2.77    0.28
   4  -1 -11    1.67    0.12
   4  -1 -11    1.45    0.12
   4  -1 -11    1.00    0.13
   4  -1 -11    1.23    0.12
   4  -1 -11    1.23    0.10
   4  -1 -11    1.31    0.12
  -4   1  11    1.41    0.12
   0  -1 -12    0.89    0.09
   0  -1 -12    0.81    0.11
   0  -1 -12    1.01    0.09
   0   1  12    1.14    0.11
   1  -1 -12    8.48    0.36
   1  -1 -12    7.30    0.36
   1  -1 -12    7.12    0.36
  -1   1  12    8.20    0.35
  -1   1  12    8.16    0.38
   2  -1 -12    0.01    0.07
   2  -1 -12    0.01    0.07
   2  -1 -12    0.03    0.05
   2  -1 -12   -0.01    0.04
   2  -1 -12   -0.01    0.03
  -2   1  12    0.04    0.08
  -2   1  12    0.00    0.04
  -2   1  12    0.06    0.08
   3  -1 -12    0.05    0.04
   3  -1 -12    0.03    0.04
   3  -1 -12    0.04    0.04
   3  -1 -12    0.08    0.07
  -3   1  12    0.04    0.08
  -3   1  12    0.09    0.04
  -3  -2  12    0.00    0.04
   3   2 -12   -0.05    0.07
   3   2 -12   -0.03    0.03
  -2  -2  12    0.79    0.11
  -2  -2  12    0.90    0.08
   2   2 -12    0.66    0.08
   2   2 -12    0.50    0.08
   2   2 -12    0.63    0.09
   2   2 -12    0.55    0.10
  -1  -2  12    3.19    0.16
  -1  -2  12    2.79    0.20
   1   2 -12    2.58    0.17
   1   2 -12    2.82    0.16
   1   2 -12    2.50    0.17
   0  -2  12    0.19    0.05
   0  -2  12    0.18    0.09
   0   2 -12    0.08    0.06
  -4  -2  11   12.60    0.57
  -4  -2  11   13.43    0.57
  -4  -2  11   13.37    0.55
   4   2 -11   13.19    0.56
   4   2 -11   13.46    0.56
   4   2 -11   12.91    0.58
   4   2 -11   13.41    0.56
   4   2 -11   12.62    0.59
   4   2 -11   12.60    0.58
  -3  -2  11    0.10    0.06
  -3  -2  11    0.06    0.06
   3   2 -11    0.14    0.07
   3   2 -11    0.16    0.06
   3   2 -11    0.05    0.09
   3   2 -11    0.09    0.06
   3   2 -11    0.06    0.07
   3   2 -11    0.17    0.08
  -2  -2  11    0.17    0.08
  -2  -2  11    0.17    0.07
   2   2 -11    0.08    0.07
   2   2 -11    0.18    0.06
   2   2 -11    0.10    0.08
   2   2 -11    0.16    0.07
  -1  -2  11    2.33    0.17
  -1  -2  11    2.48    0.18
   1   2 -11    2.20    0.18
   1   2 -11    2.30    0.17
   1   2 -11    2.43    0.16
   1   2 -11    2.45    0.19
   0  -2  11    6.29    0.31
   0  -2  11    5.81    0.32
   0   2 -11    6.28    0.33
   0   2 -11    6.14    0.31
   0   2 -11    6.39    0.31
   1  -2  11    5.23    0.28
   1  -2  11    5.46    0.26
  -1   2 -11    4.47    0.27
  -1   2 -11    5.32    0.26
  -5  -2  10    1.16    0.09
  -5  -2  10    0.89    0.11
   5   2 -10    1.10    0.11
   5   2 -10    1.00    0.12
   5   2 -10    0.84    0.10
   5   2 -10    1.00    0.09
   5   2 -10    1.01    0.09
   5   2 -10    0.90    0.08
  -4  -2  10    2.85    0.29
  -4  -2  10    2.62    0.17
  -4  -2  10    2.87    0.20
   4   2 -10    2.52    0.21
   4   2 -10    2.55    0.17
   4   2 -10    2.59    0.18
   4   2 -10    2.67    0.20
   4   2 -10    2.76    0.20
   4   2 -10    2.86    0.18
   4   2 -10    2.86    0.18
   4   2 -10    2.78    0.19
  -3  -2  10    1.30    0.17
  -3  -2  10    1.54    0.22
  -3  -2  10    1.31    0.14
   3   2 -10    1.39    0.17
   3   2 -10    1.45    0.15
   3   2 -10    1.43    0.14
   3   2 -10    1.56    0.16
   3   2 -10    1.38    0.16
   3   2 -10    1.58    0.14
   3   2 -10    1.52    0.18
   3   2 -10    1.57    0.17
  -2  -2  10    0.24    0.09
  -2  -2  10    0.14    0.13
  -2  -2  10    0.01    0.09
   2   2 -10    0.14    0.08
   2   2 -10    0.12    0.09
   2   2 -10    0.14    0.09
   2   2 -10    0.12    0.07
   2   2 -10    0.05    0.07
  -1  -2  10    3.49    0.24
  -1  -2  10    3.76    0.38
  -1  -2  10    3.41    0.23
   1   2 -10    3.67    0.23
   1   2 -10    3.57    0.25
   1   2 -10    3.26    0.24
   1   2 -10    3.66    0.23
   1   2 -10    3.32    0.26
   0  -2  10    7.34    0.38
   0  -2  10    7.16    0.38
   0   2 -10    7.27    0.38
   0   2 -10    7.60    0.37
   0   2 -10    7.11    0.40
   0   2 -10    7.81    0.38
   1  -2  10    3.31    0.21
   1  -2  10    3.36    0.20
  -1   2 -10    3.47    0.21
  -1   2 -10    3.17    0.20
  -1   2 -10    3.28    0.21
   2  -2  10    0.84    0.11
   2  -2  10    0.83    0.09
  -2   2 -10    0.69    0.10
  -2   2 -10    0.80    0.08
  -5  -2   9    3.19    0.30
  -5  -2   9    3.48    0.22
   5   2  -9    3.55    0.20
   5   2  -9    3.67    0.20
   5   2  -9    3.30    0.21
   5   2  -9    3.33    0.22
   5   2  -9    3.36    0.24
   5   2  -9    3.38    0.20
   5   2  -9    3.50    0.21
  -4  -2   9    0.00    0.15
  -4  -2   9    0.02    0.09
  -4  -2   9    0.04    0.11
   4   2  -9   -0.01    0.07
   4   2  -9   -0.06    0.07
   4   2  -9   -0.02    0.06
   4   2  -9    0.05    0.07
   4   2  -9   -0.04    0.06
   4   2  -9    0.07    0.07
   4   2  -9    0.04    0.08
   4   2  -9    0.06    0.06
  -3  -2   9    0.36    0.11
  -3  -2   9    0.22    0.16
  -3  -2   9    0.56    0.15
  -3  -2   9    0.62    0.14
  -3  -2   9    0.69    0.15
  -3  -2   9    0.68    0.11
  -3  -2   9    0.50    0.19
   3   2  -9    0.59    0.10
   3   2  -9    0.84    0.15
   3   2  -9    0.51    0.11
   3   2  -9    0.64    0.13
   3   2  -9    0.48    0.10
   3   2  -9    0.67    0.12
   3   2  -9    0.57    0.11
   3   2  -9    0.46    0.11
   3   2  -9    0.64    0.11
   3   2  -9    0.53    0.11
   3   2  -9    0.53    0.10
   3   2  -9    0.63    0.12
  -2  -2   9   16.81    0.75
  -2  -2   9   16.11    0.77
  -2  -2   9   16.32    0.76
  -2  -2   9   15.66    0.72
  -2  -2   9   17.35    0.81
  -2  -2   9   16.05    0.80
   2   2  -9   16.71    0.77
   2   2  -9   16.75    0.75
   2   2  -9   16.53    0.75
   2   2  -9   15.62    0.73
   2   2  -9   15.51    0.72
   2   2  -9   16.82    0.79
   2   2  -9   17.22    0.77
   2   2  -9   15.41    0.75
   2   2  -9   16.49    0.74
   2   2  -9   16.19    0.75
  -1  -2   9    2.03    0.19
  -1  -2   9    2.64    0.24
  -1  -2   9    2.74    0.25
  -1  -2   9    2.76    0.23
   1   2  -9    2.40    0.24
   1   2  -9    2.53    0.20
   1   2  -9    2.83    0.20
   1   2  -9    2.56    0.20
   1   2  -9    2.75    0.23
   1   2  -9    2.55    0.20
   1   2  -9    2.56    0.22
   0  -2   9    1.77    0.24
   0  -2   9    2.18    0.19
   0  -2   9    2.03    0.21
   0  -2   9    1.76    0.18
   0  -2   9    2.03    0.18
   0   2  -9    1.94    0.17
   0   2  -9    1.87    0.17
   0   2  -9    1.87    0.17
   0   2  -9    1.65    0.17
   0   2  -9    1.81    0.16
   0   2  -9    2.09    0.19
   1  -2   9    0.70    0.11
   1  -2   9    0.76    0.11
   1  -2   9    0.71    0.18
  -1   2  -9    0.95    0.13
  -1   2  -9    0.71    0.11
  -1   2  -9    0.69    0.11
  -1   2  -9    0.74    0.11
   2  -2   9   12.01    0.55
   2  -2   9   12.18    0.56
  -2   2  -9   12.05    0.56
  -2   2  -9   12.42    0.56
   3  -2   9    3.49    0.21
   3  -2   9    3.61    0.19
  -3   2  -9    3.77    0.20
  -3   2  -9    2.92    0.28
  -6  -2   8    1.91    0.12
  -6  -2   8    1.76    0.16
   6   2  -8    1.84    0.12
   6   2  -8    1.87    0.14
   6   2  -8    1.93    0.12
   6   2  -8    1.96    0.16
   6   2  -8    1.88    0.11
   6   2  -8    1.88    0.16
  -5  -2   8   11.69    0.59
  -5  -2   8   12.50    0.67
  -5  -2   8   11.74    0.61
  -5  -2   8   11.90    0.53
  -5  -2   8   11.96    0.55
   5   2  -8   12.43    0.53
   5   2  -8   11.10    0.54
   5   2  -8   11.68    0.53
   5   2  -8   11.79    0.57
   5   2  -8   12.28    0.57
   5   2  -8   11.86    0.59
   5   2  -8   11.68    0.54
   5   2  -8   12.21    0.55
  -4  -2   8    0.25    0.09
  -4  -2   8    0.32    0.14
  -4  -2   8    0.32    0.13
  -4  -2   8    0.48    0.12
  -4  -2   8    0.40    0.17
  -4  -2   8    0.37    0.10
  -4  -2   8    0.30    0.13
  -4  -2   8    0.41    0.12
   4   2  -8    0.39    0.10
   4   2  -8    0.71    0.12
   4   2  -8    0.49    0.11
   4   2  -8    0.43    0.10
   4   2  -8    0.33    0.08
   4   2  -8    0.29    0.09
   4   2  -8    0.34    0.10
   4   2  -8    0.42    0.10
   4   2  -8    0.33    0.09
   4   2  -8    0.40    0.09
   4   2  -8    0.23    0.08
  -3  -2   8    2.66    0.24
  -3  -2   8    2.54    0.21
  -3  -2   8    2.60    0.20
  -3  -2   8    2.24    0.22
  -3  -2   8    2.50    0.21
  -3  -2   8    2.40    0.23
  -3  -2   8    2.70    0.24
   3   2  -8    2.24    0.19
   3   2  -8    2.66    0.20
   3   2  -8    2.75    0.21
   3   2  -8    2.42    0.19
   3   2  -8    2.66    0.20
  -2  -2   8    3.47    0.23
  -2  -2   8    3.15    0.34
  -2  -2   8    3.54    0.27
  -2  -2   8    3.37    0.26
  -2  -2   8    3.70    0.24
  -2  -2   8    3.34    0.27
  -2  -2   8    3.30    0.25
   2   2  -8    3.26    0.23
   2   2  -8    3.20    0.22
   2   2  -8    3.38    0.22
   2   2  -8    3.25    0.24
   2   2  -8    3.41    0.23
   2   2  -8    3.41    0.23
  -1  -2   8    2.34    0.22
  -1  -2   8    2.07    0.22
   1   2  -8    2.30    0.18
   1   2  -8    2.58    0.18
   0  -2   8   30.34    1.25
   0  -2   8   25.84    1.29
   0   2  -8   26.27    1.17
   0   2  -8   27.42    1.18
   1  -2   8    1.37    0.23
   1  -2   8    1.25    0.22
  -1   2  -8    1.59    0.17
  -1   2  -8    1.54    0.15
   2  -2   8   26.44    1.15
   2  -2   8   27.63    1.16
   2  -2   8   27.66    1.30
  -2   2  -8   26.98    1.17
  -2   2  -8   26.22    1.15
  -2   2  -8   27.38    1.16
   3  -2   8    1.28    0.12
   3  -2   8    1.06    0.12
  -3   2  -8    1.21    0.13
  -3   2  -8    1.01    0.11
   4  -2   8    6.86    0.30
   4  -2   8    6.62    0.32
  -4   2  -8    6.05    0.33
  -4   2  -8    6.91    0.30
  -6  -2   7    3.25    0.19
  -6  -2   7    3.30    0.18
   6   2  -7    3.12    0.22
   6   2  -7    3.31    0.18
   6   2  -7    2.94    0.18
   6   2  -7    3.12    0.19
   6   2  -7    3.05    0.19
   6   2  -7    3.10    0.18
  -5  -2   7    0.01    0.10
  -5  -2   7    0.06    0.14
  -5  -2   7    0.08    0.08
  -5  -2   7    0.03    0.09
  -5  -2   7    0.05    0.21
   5   2  -7   -0.04    0.08
   5   2  -7    0.22    0.08
   5   2  -7    0.09    0.07
   5   2  -7    0.07    0.07
   5   2  -7    0.09    0.06
   5   2  -7    0.02    0.06
   5   2  -7   -0.04    0.05
   5   2  -7    0.09    0.07
  -4  -2   7    4.14    0.31
  -4  -2   7    4.18    0.30
  -4  -2   7    4.29    0.31
  -4  -2   7    4.61    0.28
  -4  -2   7    4.16    0.27
  -4  -2   7    4.42    0.28
  -4  -2   7    4.31    0.28
  -4  -2   7    4.23    0.31
   4   2  -7    4.21    0.27
   4   2  -7    4.33    0.30
   4   2  -7    4.05    0.25
   4   2  -7    4.11    0.26
   4   2  -7    4.44    0.29
   4   2  -7    4.17    0.27
   4   2  -7    3.89    0.27
   4   2  -7    4.52    0.28
   4   2  -7    4.15    0.24
   4   2  -7    4.10    0.27
   4   2  -7    3.59    0.26
   4   2  -7    3.99    0.25
   4   2  -7    4.20    0.27
  -3  -2   7    0.53    0.10
  -3  -2   7    0.38    0.11
  -3  -2   7    0.59    0.13
  -3  -2   7    0.33    0.10
  -3  -2   7    0.39    0.09
  -3  -2   7    0.55    0.11
  -3  -2   7    0.52    0.13
  -3  -2   7    0.39    0.10
   3   2  -7    0.41    0.09
   3   2  -7    0.32    0.08
   3   2  -7    0.86    0.11
   3   2  -7    0.49    0.09
   3   2  -7    0.46    0.11
   3   2  -7    0.35    0.08
   3   2  -7    0.37    0.09
  -2  -2   7   12.96    0.61
  -2  -2   7   11.97    0.57
  -2  -2   7   11.87    0.55
  -2  -2   7   11.05    0.57
  -2  -2   7   12.46    0.60
  -2  -2   7   11.07    0.62
  -2  -2   7   11.70    0.56
   2   2  -7   12.04    0.55
   2   2  -7   11.02    0.56
   2   2  -7   11.54    0.54
   2   2  -7   11.64    0.55
   2   2  -7   11.09    0.54
  -1  -2   7   18.70    0.98
  -1  -2   7   20.67    0.96
  -1  -2   7   19.04    0.86
  -1  -2   7   20.31    0.92
  -1  -2   7   19.95    0.89
  -1  -2   7   19.59    0.95
  -1  -2   7   19.42    0.88
   1   2  -7   20.39    0.87
   1   2  -7   20.85    0.88
   1   2  -7   20.68    0.86
   1   2  -7   20.82    0.90
   0  -2   7    2.35    0.22
   0  -2   7    2.29    0.24
   0  -2   7    1.81    0.20
   0   2  -7    2.13    0.17
   0   2  -7    2.67    0.19
   0   2  -7    2.21    0.17
   1  -2   7   30.24    1.41
   1  -2   7   30.48    1.32
  -1   2  -7   30.17    1.28
  -1   2  -7   29.13    1.28
   2  -2   7    0.26    0.14
  -2   2  -7    0.31    0.08
  -2   2  -7    0.35    0.09
   3  -2   7    3.46    0.25
   3  -2   7    3.65    0.24
   3  -2   7    3.48    0.22
  -3   2  -7    3.37    0.24
  -3   2  -7    3.62    0.24
  -3   2  -7    3.47    0.23
  -3   2  -7    3.80    0.26
   4  -2   7    9.87    0.44
   4  -2   7    9.57    0.45
  -4   2  -7    9.72    0.48
  -4   2  -7    9.32    0.47
  -4   2  -7   10.21    0.45
  -6  -2   6    8.39    0.44
  -6  -2   6    7.62    0.38
  -6  -2   6    8.19    0.39
   6   2  -6    8.02    0.42
   6   2  -6    7.32    0.38
   6   2  -6    7.90    0.40
   6   2  -6    8.10    0.37
   6   2  -6    7.83    0.38
   6   2  -6    8.16    0.39
   6   2  -6    8.01    0.37
   6   2  -6    8.50    0.38
  -5  -2   6   17.08    0.75
  -5  -2   6   15.94    0.78
  -5  -2   6   17.06    0.77
  -5  -2   6   16.21    0.77
  -5  -2   6   14.85    0.79
  -5  -2   6   16.88    0.75
  -5  -2   6   15.31    0.73
   5   2  -6   16.85    0.75
   5   2  -6   16.45    0.79
   5   2  -6   16.39    0.74
   5   2  -6   16.32    0.71
   5   2  -6   17.07    0.72
   5   2  -6   15.37    0.79
   5   2  -6   15.52    0.81
   5   2  -6   15.09    0.80
   5   2  -6   15.91    0.72
   5   2  -6   15.83    0.73
   5   2  -6   15.17    0.75
   5   2  -6   17.58    0.77
  -4  -2   6    0.50    0.11
  -4  -2   6    0.62    0.12
  -4  -2   6    0.44    0.12
  -4  -2   6    0.39    0.08
  -4  -2   6    0.57    0.14
  -4  -2   6    0.44    0.11
  -4  -2   6    0.45    0.09
  -4  -2   6    0.45    0.11
  -4  -2   6    0.35    0.10
   4   2  -6    0.79    0.14
   4   2  -6    0.50    0.11
   4   2  -6    0.40    0.10
   4   2  -6    0.66    0.11
   4   2  -6    0.35    0.09
   4   2  -6    0.38    0.10
   4   2  -6    0.44    0.10
  -3  -2   6    3.98    0.23
  -3  -2   6    2.92    0.22
  -3  -2   6    3.72    0.26
  -3  -2   6    3.53    0.25
  -3  -2   6    3.36    0.22
  -3  -2   6    3.48    0.23
  -3  -2   6    3.55    0.23
   3   2  -6    3.30    0.22
   3   2  -6    3.51    0.22
   3   2  -6    2.83    0.24
   3   2  -6    3.96    0.23
   3   2  -6    3.72    0.23
   3   2  -6    4.36    0.23
   3   2  -6    3.51    0.24
   3   2  -6    3.80    0.24
  -2  -2   6    0.45    0.11
  -2  -2   6    0.49    0.11
  -2  -2   6    0.38    0.08
  -2  -2   6    0.28    0.08
  -2  -2   6    0.37    0.10
  -2  -2   6    0.28    0.07
  -2  -2   6    0.38    0.08
   2   2  -6    0.45    0.08
   2   2  -6    0.24    0.08
   2   2  -6    0.51    0.07
   2   2  -6    0.28    0.07
   2   2  -6    0.48    0.09
   2   2  -6    0.35    0.08
   2   2  -6    0.42    0.07
  -1  -2   6    7.21    0.37
  -1  -2   6    8.41    0.44
  -1  -2   6    7.50    0.42
  -1  -2   6    7.41    0.40
  -1  -2   6    7.83    0.39
  -1  -2   6    8.05    0.42
  -1  -2   6    8.49    0.43
   1   2  -6    7.72    0.38
   1   2  -6    8.34    0.37
   1   2  -6    7.37    0.36
   1   2  -6    7.83    0.39
   1   2  -6    7.94    0.37
   0  -2   6    2.30    0.19
   0  -2   6    2.19    0.19
   0  -2   6    2.06    0.20
   0   2  -6    2.15    0.15
   0   2  -6    2.25    0.16
   0   2  -6    2.26    0.16
   1  -2   6   72.12    3.00
   1  -2   6   69.22    2.91
  -1   2  -6   69.94    2.88
  -1   2  -6   70.55    2.90
  -1   2  -6   72.39    2.89
   2  -2   6    5.30    0.55
   2  -2   6    7.13    0.45
   2  -2   6    5.92    0.34
  -2   2  -6    7.02    0.35
  -2   2  -6    5.87    0.35
  -2   2  -6    7.17    0.35
   3  -2   6    0.06    0.07
   3  -2   6    0.08    0.07
   3  -2   6    0.07    0.08
  -3   2  -6   -0.02    0.07
  -3   2  -6   -0.11    0.07
  -3   2  -6    0.00    0.08
  -3   2  -6    0.07    0.06
  -3   2  -6    0.02    0.07
   4  -2   6    2.82    0.19
   4  -2   6    3.00    0.19
   4  -2   6    2.64    0.22
  -4   2  -6    3.06    0.22
  -4   2  -6    2.88    0.22
   5  -2   6    3.27    0.16
   5  -2   6    3.34    0.19
  -5   2  -6    2.96    0.18
  -5   2  -6    2.72    0.21
  -6  -2   5    0.26    0.08
  -6  -2   5    0.32    0.13
  -6  -2   5    0.31    0.08
   6   2  -5    0.24    0.07
   6   2  -5    0.21    0.07
   6   2  -5    0.29    0.09
   6   2  -5    0.20    0.07
   6   2  -5    0.24    0.09
   6   2  -5    0.28    0.07
   6   2  -5    0.37    0.08
  -5  -2   5    3.13    0.23
  -5  -2   5    2.69    0.23
  -5  -2   5    2.98    0.23
  -5  -2   5    2.98    0.24
  -5  -2   5    2.96    0.28
  -5  -2   5    2.90    0.27
  -5  -2   5    2.67    0.21
   5   2  -5    2.92    0.19
   5   2  -5    2.74    0.19
   5   2  -5    2.73    0.20
   5   2  -5    2.99    0.24
   5   2  -5    2.69    0.20
   5   2  -5    2.96    0.24
   5   2  -5    2.83    0.21
   5   2  -5    2.88    0.24
   5   2  -5    3.26    0.23
   5   2  -5    2.97    0.22
   5   2  -5    2.47    0.20
   5   2  -5    2.90    0.22
  -4  -2   5    0.04    0.07
  -4  -2   5    0.05    0.08
  -4  -2   5   -0.04    0.05
  -4  -2   5   -0.01    0.05
  -4  -2   5    0.12    0.07
  -4  -2   5    0.11    0.08
  -4  -2   5    0.01    0.06
  -4  -2   5    0.00    0.07
  -4  -2   5    0.12    0.07
   4   2  -5    0.05    0.07
   4   2  -5    0.06    0.07
   4   2  -5    0.07    0.07
   4   2  -5    0.07    0.06
   4   2  -5   -0.06    0.07
   4   2  -5    0.09    0.07
   4   2  -5    0.18    0.07
  -3  -2   5   30.44    1.23
  -3  -2   5   29.33    1.26
  -3  -2   5   28.91    1.23
  -3  -2   5   29.31    1.23
  -3  -2   5   28.14    1.22
  -3  -2   5   29.16    1.26
  -3  -2   5   28.89    1.22
   3   2  -5   27.73    1.26
   3   2  -5   28.56    1.23
   3   2  -5   28.28    1.22
   3   2  -5   29.07    1.22
   3   2  -5   28.69    1.24
   3   2  -5   29.23    1.22
   3   2  -5   29.27    1.24
   3   2  -5   29.95    1.22
  -2  -2   5    0.16    0.05
  -2  -2   5    0.13    0.07
  -2  -2   5    0.09    0.05
  -2  -2   5    0.11    0.05
  -2  -2   5    0.10    0.05
  -2  -2   5    0.14    0.07
   2   2  -5    0.15    0.04
   2   2  -5    0.12    0.04
   2   2  -5    0.11    0.05
   2   2  -5    0.09    0.07
   2   2  -5    0.13    0.05
   2   2  -5    0.10    0.04
  -1  -2   5   30.31    1.24
  -1  -2   5   31.01    1.26
  -1  -2   5   26.98    1.24
  -1  -2   5   28.14    1.23
  -1  -2   5   31.06    1.24
   1   2  -5   28.69    1.20
   1   2  -5   29.55    1.22
   1   2  -5   28.06    1.21
   1   2  -5   30.04    1.22
   1   2  -5   29.27    1.19
   1   2  -5   27.77    1.26
   1   2  -5   27.78    1.19
   1   2  -5   29.44    1.21
   0  -2   5    1.29    0.14
   0  -2   5    1.25    0.14
   0  -2   5    1.39    0.13
   0   2  -5    1.22    0.10
   0   2  -5    1.22    0.12
   0   2  -5    1.39    0.11
   1  -2   5   47.79    2.02
   1  -2   5   51.28    2.19
   1  -2   5   44.75    1.96
   1  -2   5   46.75    1.98
  -1   2  -5   45.71    1.93
  -1   2  -5   47.59    1.94
  -1   2  -5   47.21    1.95
   2  -2   5    5.91    0.54
   2  -2   5    6.73    0.42
   2  -2   5    5.43    0.37
  -2   2  -5    6.65    0.34
  -2   2  -5    6.65    0.35
  -2   2  -5    6.25    0.33
   3  -2   5    3.70    0.24
   3  -2   5    2.68    0.41
  -3   2  -5    4.13    0.25
  -3   2  -5    3.73    0.24
  -3   2  -5    3.67    0.24
   4  -2   5    4.60    0.31
   4  -2   5    4.26    0.25
   4  -2   5    4.53    0.29
   4  -2   5    4.23    0.26
  -4   2  -5    4.43    0.29
  -4   2  -5    4.22    0.27
  -4   2  -5    4.17    0.30
  -4   2  -5    4.95    0.28
   5  -2   5    3.99    0.25
   5  -2   5    4.05    0.22
   5  -2   5    3.95    0.21
  -5   2  -5    3.86    0.25
  -5   2  -5    3.82    0.23
  -5   2  -5    3.72    0.23
  -6  -2   4    2.23    0.25
  -6  -2   4    2.52    0.18
  -6  -2   4    2.63    0.23
   6   2  -4    2.50    0.20
   6   2  -4    2.46    0.17
   6   2  -4    2.79    0.19
   6   2  -4    2.40    0.17
   6   2  -4    2.27    0.19
   6   2  -4    2.47    0.19
   6   2  -4    2.61    0.18
   6   2  -4    2.58    0.17
   6   2  -4    2.52    0.16
  -5  -2   4    0.37    0.13
  -5  -2   4    0.50    0.14
  -5  -2   4    0.46    0.10
  -5  -2   4    0.41    0.11
  -5  -2   4    0.48    0.12
  -5  -2   4    0.50    0.11
  -5  -2   4    0.49    0.11
  -5  -2   4    0.51    0.14
  -5  -2   4    0.43    0.10
   5   2  -4    0.42    0.10
   5   2  -4    0.29    0.08
   5   2  -4    0.29    0.10
   5   2  -4    0.45    0.10
   5   2  -4    0.29    0.09
   5   2  -4    0.22    0.10
   5   2  -4    0.36    0.09
   5   2  -4    0.21    0.09
   5   2  -4    0.37    0.09
   5   2  -4    0.43    0.10
   5   2  -4    0.27    0.08
   5   2  -4    0.48    0.10
  -4  -2   4    1.64    0.16
  -4  -2   4    1.56    0.14
  -4  -2   4    1.77    0.14
  -4  -2   4    1.52    0.16
  -4  -2   4    1.58    0.18
  -4  -2   4    1.43    0.16
  -4  -2   4    1.74    0.15
  -4  -2   4    1.35    0.15
  -4  -2   4    1.69    0.18
   4   2  -4    1.74    0.16
   4   2  -4    1.72    0.15
   4   2  -4    1.36    0.15
   4   2  -4    1.59    0.16
   4   2  -4    2.06    0.16
   4   2  -4    1.59    0.16
   4   2  -4    1.52    0.17
  -3  -2   4   33.75    1.45
  -3  -2   4   33.50    1.43
  -3  -2   4   34.30    1.45
  -3  -2   4   35.67    1.48
  -3  -2   4   33.69    1.45
  -3  -2   4   34.32    1.45
  -3  -2   4   35.23    1.48
  -3  -2   4   36.65    1.49
   3   2  -4   36.11    1.47
   3   2  -4   35.55    1.45
   3   2  -4   34.50    1.45
   3   2  -4   36.50    1.49
   3   2  -4   33.37    1.44
   3   2  -4   36.25    1.45
   3   2  -4   33.54    1.45
   3   2  -4   35.82    1.47
  -2  -2   4   10.10    0.48
  -2  -2   4   10.39    0.47
  -2  -2   4    9.82    0.46
  -2  -2   4    9.38    0.44
   2   2  -4   10.27    0.46
   2   2  -4    9.84    0.44
   2   2  -4    9.33    0.43
   2   2  -4    9.87    0.46
   2   2  -4    9.85    0.44
   2   2  -4    9.87    0.45
   2   2  -4    9.44    0.44
  -1  -2   4  231.89    9.26
  -1  -2   4  233.91    9.28
   1   2  -4  237.14    9.25
   1   2  -4  227.74    9.29
   1   2  -4  231.18    9.24
   0  -2   4    2.73    0.17
   0  -2   4    2.66    0.15
   0   2  -4    2.47    0.18
   0   2  -4    2.61    0.15
   0   2  -4    2.36    0.14
   1  -2   4   32.02    1.30
   1  -2   4   32.32    1.46
   1  -2   4   30.98    1.33
  -1   2  -4   29.72    1.27
  -1   2  -4   29.17    1.26
  -1   2  -4   29.12    1.27
  -1   2  -4   31.08    1.27
   2  -2   4    0.45    0.13
   2  -2   4    0.57    0.11
   2  -2   4    0.52    0.19
  -2   2  -4    0.55    0.09
  -2   2  -4    0.47    0.07
  -2   2  -4    0.45    0.08
  -3   2  -4  105.27    4.11
  -3   2  -4   98.88    4.17
  -3   2  -4  101.14    4.10
  -3   2  -4  100.31    4.13
   4  -2   4    0.33    0.09
   4  -2   4    0.33    0.08
   4  -2   4    0.33    0.08
   4  -2   4    0.32    0.10
   4  -2   4    0.37    0.10
  -4   2  -4    0.30    0.09
  -4   2  -4    0.48    0.11
  -4   2  -4    0.30    0.09
  -4   2  -4    0.28    0.07
  -4   2  -4    0.42    0.10
   5  -2   4    0.11    0.05
   5  -2   4   -0.03    0.06
   5  -2   4    0.02    0.05
   5  -2   4   -0.05    0.06
  -5   2  -4    0.00    0.07
  -5   2  -4   -0.02    0.06
  -5   2  -4    0.02    0.07
  -6  -2   3   20.66    0.92
  -6  -2   3   22.45    0.92
  -6  -2   3   20.41    0.96
   6   2  -3   21.84    0.90
   6   2  -3   21.31    0.91
   6   2  -3   21.97    0.96
   6   2  -3   22.37    0.93
   6   2  -3   20.82    0.92
   6   2  -3   22.36    0.94
   6   2  -3   22.18    0.91
   6   2  -3   20.95    0.93
   6   2  -3   21.31    0.93
   6   2  -3   21.13    0.96
  -5  -2   3    0.13    0.09
  -5  -2   3    0.18    0.11
  -5  -2   3    0.16    0.08
  -5  -2   3    0.16    0.09
  -5  -2   3    0.15    0.08
  -5  -2   3    0.15    0.09
  -5  -2   3    0.01    0.08
  -5  -2   3    0.29    0.12
  -5  -2   3    0.15    0.12
  -5  -2   3    0.06    0.11
   5   2  -3    0.19    0.08
   5   2  -3    0.21    0.08
   5   2  -3    0.13    0.09
   5   2  -3    0.17    0.07
   5   2  -3    0.19    0.08
   5   2  -3    0.08    0.07
   5   2  -3    0.05    0.08
   5   2  -3    0.12    0.08
   5   2  -3    0.14    0.08
   5   2  -3    0.08    0.12
   5   2  -3    0.10    0.08
   5   2  -3    0.16    0.08
   5   2  -3    0.08    0.07
  -4  -2   3   12.64    0.58
  -4  -2   3   12.70    0.63
  -4  -2   3   11.93    0.61
  -4  -2   3   11.68    0.55
  -4  -2   3   13.10    0.57
  -4  -2   3   11.93    0.62
  -4  -2   3   13.25    0.62
   4   2  -3   12.02    0.57
   4   2  -3   11.35    0.61
   4   2  -3   11.91    0.57
   4   2  -3   11.79    0.59
   4   2  -3   12.04    0.57
  -3  -2   3    0.09    0.04
  -3  -2   3    0.04    0.07
  -3  -2   3    0.02    0.04
  -3  -2   3    0.04    0.05
  -3  -2   3    0.04    0.07
  -3  -2   3    0.08    0.04
   3   2  -3    0.03    0.04
   3   2  -3    0.00    0.03
   3   2  -3    0.02    0.04
   3   2  -3    0.11    0.07
  -2  -2   3   19.17    0.84
  -2  -2   3   19.66    0.85
   2   2  -3   20.59    0.90
   2   2  -3   18.75    0.83
   2   2  -3   20.97    0.85
  -1  -2   3   12.68    0.56
   1   2  -3   13.05    0.58
   1   2  -3   12.91    0.55
   1   2  -3   12.23    0.54
   0  -2   3   79.01    3.33
   0  -2   3   83.02    3.31
   0   2  -3   84.78    3.35
   0   2  -3   84.35    3.32
   1  -2   3    0.61    0.09
   1  -2   3    0.52    0.07
   1  -2   3    0.72    0.13
  -1   2  -3    0.59    0.08
  -1   2  -3    0.64    0.09
  -1   2  -3    0.65    0.07
   2  -2   3    8.41    0.39
   2  -2   3    8.78    0.44
   2  -2   3    8.26    0.40
   2  -2   3    8.69    0.46
   2  -2   3    8.58    0.59
  -2   2  -3    8.16    0.39
  -2   2  -3    8.87    0.41
  -2   2  -3    7.46    0.46
  -2   2  -3    8.09    0.44
  -2   2  -3    8.59    0.40
  -2   2  -3    8.68    0.41
   3  -2   3    2.28    0.17
   3  -2   3    1.84    0.19
   3  -2   3    2.13    0.26
   3  -2   3    2.16    0.33
  -3   2  -3    2.30    0.18
  -3   2  -3    2.10    0.17
  -3   2  -3    1.87    0.14
  -3   2  -3    2.42    0.16
   4  -2   3    1.19    0.14
   4  -2   3    1.54    0.29
   4  -2   3    1.09    0.32
   4  -2   3    1.05    0.13
  -4   2  -3    1.49    0.17
  -4   2  -3    1.49    0.17
  -4   2  -3    1.07    0.13
  -4   2  -3    1.18    0.14
   5  -2   3    5.11    0.29
   5  -2   3    5.14    0.28
   5  -2   3    4.82    0.26
   5  -2   3    5.04    0.33
   5  -2   3    4.68    0.29
  -5   2  -3    4.51    0.30
  -5   2  -3    5.32    0.27
  -5   2  -3    4.94    0.29
  -5   2  -3    5.40    0.34
   6  -2   3    0.04    0.07
   6  -2   3   -0.02    0.07
   6  -2   3   -0.05    0.04
   6  -2   3   -0.01    0.03
  -6   2  -3    0.03    0.05
  -6   2  -3   -0.02    0.09
  -6  -2   2    5.16    0.41
  -6  -2   2    6.17    0.35
  -6  -2   2    6.08    0.31
  -6  -2   2    5.91    0.32
   6   2  -2    6.12    0.31
   6   2  -2    5.65    0.30
   6   2  -2    6.17    0.32
   6   2  -2    5.60    0.33
   6   2  -2    6.13    0.32
   6   2  -2    5.96    0.31
   6   2  -2    6.51    0.34
  -5  -2   2    1.04    0.14
  -5  -2   2    1.08    0.16
  -5  -2   2    0.99    0.13
  -5  -2   2    0.90    0.13
  -5  -2   2    1.01    0.15
  -5  -2   2    0.89    0.14
  -5  -2   2    1.08    0.19
   5   2  -2    0.94    0.12
   5   2  -2    0.81    0.13
   5   2  -2    0.82    0.13
   5   2  -2    0.84    0.13
   5   2  -2    0.80    0.11
   5   2  -2    0.81    0.12
   5   2  -2    0.71    0.13
   5   2  -2    0.91    0.13
   5   2  -2    0.75    0.11
   5   2  -2    0.67    0.20
   5   2  -2    0.63    0.11
   5   2  -2    0.66    0.11
   5   2  -2    1.26    0.15
  -4  -2   2   25.67    1.16
  -4  -2   2   25.45    1.11
  -4  -2   2   26.68    1.11
  -4  -2   2   26.92    1.15
  -4  -2   2   25.35    1.09
  -4  -2   2   25.77    1.17
   4   2  -2   25.94    1.11
   4   2  -2   25.97    1.29
   4   2  -2   24.75    1.10
   4   2  -2   26.16    1.14
   4   2  -2   25.38    1.16
   4   2  -2   25.59    1.11
  -3  -2   2    7.07    0.37
  -3  -2   2    6.86    0.35
  -3  -2   2    6.74    0.33
  -3  -2   2    6.87    0.37
  -3  -2   2    6.52    0.31
  -3  -2   2    6.40    0.32
   3   2  -2    6.36    0.32
   3   2  -2    7.04    0.34
   3   2  -2    6.85    0.43
   3   2  -2    6.61    0.34
   3   2  -2    6.69    0.35
   3   2  -2    6.64    0.34
   3   2  -2    6.73    0.33
  -2  -2   2    1.24    0.12
  -2  -2   2    1.28    0.10
  -2  -2   2    1.33    0.11
   2   2  -2    1.21    0.09
   2   2  -2    1.21    0.12
   2   2  -2    1.28    0.10
  -1  -2   2    2.33    0.14
   1   2  -2    2.67    0.14
   1   2  -2    2.86    0.16
   0  -2   2   26.79    1.11
   0  -2   2   26.33    1.12
   0   2  -2   27.41    1.11
   0   2  -2   28.81    1.14
   1  -2   2  165.05    6.43
   1  -2   2  149.96    6.40
   1  -2   2  168.72    6.54
  -1   2  -2  163.95    6.45
  -1   2  -2  157.24    6.41
   2  -2   2    0.12    0.10
   2  -2   2    0.07    0.04
   2  -2   2    0.16    0.07
   2  -2   2    0.13    0.04
   2  -2   2    0.12    0.05
  -2   2  -2    0.07    0.06
  -2   2  -2    0.22    0.07
  -2   2  -2    0.06    0.07
  -2   2  -2    0.07    0.03
  -2   2  -2    0.22    0.06
   3  -2   2    0.54    0.10
   3  -2   2    0.50    0.10
   3  -2   2    1.09    0.15
   3  -2   2    0.55    0.09
   3  -2   2    0.83    0.22
   3  -2   2    0.40    0.13
  -3   2  -2    0.54    0.10
  -3   2  -2    0.48    0.09
  -3   2  -2    0.69    0.11
  -3   2  -2    0.42    0.07
  -3   2  -2    0.44    0.11
  -3   2  -2    0.41    0.12
  -3   2  -2    0.38    0.06
   4  -2   2    2.76    0.33
   4  -2   2    2.43    0.38
   4  -2   2    2.64    0.20
   4  -2   2    2.81    0.21
   4  -2   2    2.94    0.21
  -4   2  -2    2.97    0.18
  -4   2  -2    2.59    0.24
  -4   2  -2    2.80    0.19
  -4   2  -2    2.91    0.21
  -4   2  -2    2.75    0.21
  -4   2  -2    3.35    0.25
  -4   2  -2    2.86    0.20
  -4   2  -2    2.81    0.21
   5  -2   2    2.96    0.21
   5  -2   2    3.10    0.21
   5  -2   2    2.64    0.34
   5  -2   2    3.15    0.22
   5  -2   2    3.12    0.25
   5  -2   2    2.95    0.20
  -5   2  -2    3.38    0.22
  -5   2  -2    3.37    0.24
  -5   2  -2    3.45    0.27
  -5   2  -2    3.16    0.25
  -5   2  -2    3.33    0.21
  -5   2  -2    3.17    0.22
   6  -2   2    1.17    0.14
   6  -2   2    1.47    0.12
   6  -2   2    1.53    0.11
   6  -2   2    1.50    0.14
  -6   2  -2    1.50    0.14
  -6   2  -2    1.10    0.13
  -6   2  -2    1.40    0.13
  -6  -2   1    2.31    0.18
  -6  -2   1    2.45    0.16
   6   2  -1    2.16    0.17
   6   2  -1    2.48    0.17
   6   2  -1    2.27    0.17
   6   2  -1    2.32    0.18
   6   2  -1    2.39    0.20
  -5  -2   1    1.10    0.15
  -5  -2   1    1.45    0.16
  -5  -2   1    1.14    0.14
  -5  -2   1    1.16    0.14
  -5  -2   1    1.29    0.15
   5   2  -1    1.11    0.14
   5   2  -1    1.06    0.13
   5   2  -1    1.36    0.15
   5   2  -1    1.16    0.15
   5   2  -1    1.27    0.26
   5   2  -1    1.06    0.13
   5   2  -1    0.99    0.16
   5   2  -1    1.22    0.16
   5   2  -1    1.10    0.13
   5   2  -1    1.30    0.15
  -4  -2   1   43.53    1.76
  -4  -2   1   40.77    1.71
  -4  -2   1   40.19    1.71
  -4  -2   1   39.37    1.68
  -4  -2   1   41.17    1.70
  -4  -2   1   42.00    1.77
  -4  -2   1   42.06    1.76
   4   2  -1   41.33    1.73
   4   2  -1   39.40    1.69
   4   2  -1   41.08    1.71
   4   2  -1   42.15    1.71
   4   2  -1   40.07    1.76
   4   2  -1   38.57    1.89
  -3  -2   1   21.46    0.95
  -3  -2   1   21.10    0.94
  -3  -2   1   23.98    0.99
  -3  -2   1   24.33    0.99
  -3  -2   1   21.24    0.93
  -3  -2   1   22.39    0.97
   3   2  -1   22.13    0.96
   3   2  -1   23.68    1.07
   3   2  -1   22.98    0.98
   3   2  -1   21.45    0.94
   3   2  -1   21.98    0.95
  -2  -2   1  114.02    5.01
  -2  -2   1  123.25    5.02
   2   2  -1  121.25    5.02
   2   2  -1  132.45    5.03
   2   2  -1  134.58    5.02
   2   2  -1  128.77    5.07
  -1  -2   1   23.70    1.01
   1   2  -1   26.17    1.03
   1   2  -1   24.81    1.01
   1   2  -1   24.53    1.00
   0  -2   1  113.47    4.54
   0  -2   1  114.56    4.54
   0  -2   1  113.93    4.62
   0   2  -1  108.93    4.52
   0   2  -1  117.53    4.54
   1  -2   1    5.39    0.26
   1  -2   1    5.29    0.25
  -1   2  -1    5.62    0.28
  -1   2  -1    5.43    0.25
   2  -2   1   90.49    3.61
   2  -2   1   84.80    3.45
   2  -2   1   84.95    3.44
  -2   2  -1   82.68    3.43
  -2   2  -1   85.40    3.44
  -2   2  -1   81.69    3.43
  -2   2  -1   86.97    3.50
   3  -2   1   14.00    0.84
   3  -2   1   13.07    0.61
   3  -2   1   13.83    0.65
   3  -2   1   13.31    0.65
   3  -2   1   13.76    0.62
   3  -2   1   13.47    0.74
   3  -2   1   12.77    0.62
  -3   2  -1   13.61    0.61
  -3   2  -1   14.20    0.63
  -3   2  -1   14.89    0.65
  -3   2  -1   13.32    0.59
  -3   2  -1   14.39    0.65
  -3   2  -1   13.45    0.62
  -3   2  -1   13.51    0.64
   4  -2   1   12.15    0.90
   4  -2   1   13.76    0.65
   4  -2   1   13.72    0.63
   4  -2   1   13.48    0.82
   4  -2   1   13.86    0.67
  -4   2  -1   14.67    0.66
  -4   2  -1   14.47    0.63
  -4   2  -1   14.60    0.69
  -4   2  -1   14.53    0.68
  -4   2  -1   14.71    0.65
  -4   2  -1   11.92    0.63
  -4   2  -1   14.93    0.70
  -4   2  -1   13.33    0.61
   5  -2   1    1.83    0.17
   5  -2   1    1.52    0.18
   5  -2   1    1.59    0.16
   5  -2   1    1.59    0.16
   5  -2   1    1.75    0.16
   5  -2   1    1.53    0.18
   5  -2   1    1.51    0.29
   5  -2   1    1.42    0.13
   5  -2   1    1.52    0.14
   5  -2   1    1.59    0.18
  -5   2  -1    1.85    0.17
  -5   2  -1    1.61    0.18
  -5   2  -1    2.08    0.20
  -5   2  -1    2.07    0.21
  -5   2  -1    1.77    0.17
  -5   2  -1    1.71    0.16
   6  -2   1    1.63    0.13
   6  -2   1    1.23    0.17
   6  -2   1    1.62    0.16
   6  -2   1    1.38    0.12
   6  -2   1    1.58    0.14
   6  -2   1    1.43    0.13
  -6   2  -1    1.65    0.14
  -6   2  -1    1.47    0.15
  -6  -2   0    6.41    0.31
  -6  -2   0    6.45    0.33
  -6  -2   0    5.56    0.37
   6   2   0    6.13    0.32
   6   2   0    6.05    0.31
   6   2   0    6.90    0.35
   6   2   0    5.74    0.33
   6   2   0    6.47    0.32
  -5  -2   0    0.43    0.10
  -5  -2   0    0.47    0.11
  -5  -2   0    0.54    0.10
  -5  -2   0    0.60    0.14
   5   2   0    0.46    0.17
   5   2   0    0.53    0.10
   5   2   0    0.49    0.12
   5   2   0    0.54    0.10
   5   2   0    0.61    0.11
   5   2   0    0.50    0.10
   5   2   0    0.64    0.11
  -4  -2   0    3.09    0.19
  -4  -2   0    3.98    0.23
  -4  -2   0    3.15    0.25
  -4  -2   0    3.77    0.32
  -4  -2   0    3.24    0.22
  -4  -2   0    3.12    0.21
   4   2   0    2.84    0.34
   4   2   0    3.69    0.27
   4   2   0    3.51    0.24
   4   2   0    3.23    0.22
  -3  -2   0    0.70    0.10
  -3  -2   0    0.50    0.08
  -3  -2   0    0.53    0.13
  -3  -2   0    0.69    0.10
  -3  -2   0    0.69    0.08
  -3  -2   0    0.71    0.13
   3   2   0    0.78    0.18
   3   2   0    0.60    0.10
   3   2   0    0.49    0.08
   3   2   0    0.50    0.09
   3   2   0    0.66    0.08
   3   2   0    0.65    0.08
   3   2   0    0.75    0.20
  -2  -2   0    5.13    0.27
   2   2   0    6.04    0.38
   2   2   0    5.91    0.28
   2   2   0    5.23    0.30
   2   2   0    5.08    0.26
   1   2   0   11.20    0.45
   1   2   0   10.27    0.44
   1   2   0   10.28    0.46
   0  -2   0   71.90    3.02
   0  -2   0   71.11    2.96
   0   2   0   76.13    3.02
   1  -2   0   11.47    0.50
   1  -2   0   11.48    0.52
   1  -2   0   11.94    0.50
  -1   2   0   11.96    0.52
   2  -2   0    5.35    0.28
   2  -2   0    6.00    0.38
   2  -2   0    5.70    0.28
   2  -2   0    5.40    0.31
  -2   2   0    5.32    0.26
  -2   2   0    5.09    0.26
  -2   2   0    5.63    0.32
   3  -2   0    0.57    0.10
   3  -2   0    0.59    0.09
   3  -2   0    0.50    0.08
   3  -2   0    0.61    0.16
   3  -2   0    0.67    0.11
   3  -2   0    0.70    0.19
   3  -2   0    0.58    0.10
  -3   2   0    0.70    0.10
  -3   2   0    0.61    0.11
  -3   2   0    0.73    0.12
  -3   2   0    0.63    0.08
  -3   2   0    0.65    0.07
   4  -2   0    3.38    0.25
   4  -2   0    3.34    0.26
   4  -2   0    3.33    0.21
   4  -2   0    3.23    0.34
   4  -2   0    3.65    0.24
   4  -2   0    3.71    0.23
  -4   2   0    3.11    0.19
  -4   2   0    3.06    0.25
  -4   2   0    3.33    0.20
  -4   2   0    3.35    0.26
  -4   2   0    3.30    0.26
  -4   2   0    3.45    0.23
  -4   2   0    3.60    0.26
   5  -2   0    0.62    0.14
   5  -2   0    0.58    0.10
   5  -2   0    0.46    0.11
   5  -2   0    0.54    0.10
   5  -2   0    0.42    0.09
   5  -2   0    0.53    0.20
   5  -2   0    0.56    0.09
   5  -2   0    0.49    0.10
   5  -2   0    0.70    0.14
   5  -2   0    0.53    0.10
   5  -2   0    0.47    0.09
   5  -2   0    0.43    0.10
   5  -2   0    0.41    0.11
  -5   2   0    0.49    0.11
  -5   2   0    0.76    0.12
  -5   2   0    0.59    0.13
  -5   2   0    0.75    0.12
  -5   2   0    0.30    0.13
  -5   2   0    0.44    0.11
  -5   2   0    0.47    0.13
  -5   2   0    0.44    0.11
   6  -2   0    5.33    0.34
   6  -2   0    6.51    0.31
   6  -2   0    6.08    0.35
   6  -2   0    6.23    0.31
   6  -2   0    6.78    0.33
   6  -2   0    6.47    0.30
   6  -2   0    6.57    0.30
   6  -2   0    6.48    0.33
  -6   2   0    6.21    0.35
  -6   2   0    6.18    0.32
  -6   2   0    6.31    0.35
  -6  -2  -1    1.20    0.13
  -6  -2  -1    1.39    0.15
   6   2   1    1.52    0.13
   6   2   1    1.50    0.13
   6   2   1    1.56    0.16
   6   2   1    1.65    0.13
  -5  -2  -1    1.68    0.15
  -5  -2  -1    1.58    0.16
  -5  -2  -1    1.94    0.22
   5   2   1    1.77    0.17
   5   2   1    1.31    0.26
   5   2   1    1.33    0.14
   5   2   1    1.48    0.15
   5   2   1    1.42    0.16
  -4  -2  -1   13.82    0.63
  -4  -2  -1   14.35    0.68
  -4  -2  -1   14.78    0.64
  -4  -2  -1   11.62    0.62
   4   2   1   12.36    0.98
   4   2   1   13.62    0.82
   4   2   1   14.31    0.62
  -3  -2  -1   12.88    0.59
  -3  -2  -1   13.06    0.59
  -3  -2  -1   12.06    0.59
  -3  -2  -1   14.46    0.63
   3   2   1   13.55    0.82
   3   2   1   13.20    0.64
   3   2   1   12.89    0.59
   3   2   1   13.86    0.73
   3   2   1   14.55    0.61
  -2  -2  -1   82.23    3.42
  -2  -2  -1   78.65    3.39
   2   2   1   91.59    3.56
   2   2   1   79.08    3.42
   2   2   1   84.57    3.39
   2   2   1   89.56    3.41
  -1  -2  -1    4.93    0.24
  -1  -2  -1    4.94    0.23
   1   2   1    5.22    0.24
   1   2   1    5.29    0.23
   1   2   1    5.50    0.24
   0  -2  -1  111.14    4.57
   0   2   1  114.56    4.52
   1  -2  -1   25.79    1.08
   1  -2  -1   26.71    1.09
   1  -2  -1   26.74    1.09
   1  -2  -1   27.92    1.12
  -1   2   1   26.98    1.12
   2  -2  -1  140.59    5.53
   2  -2  -1  131.53    5.42
   2  -2  -1  135.10    5.42
   2  -2  -1  140.14    5.43
   2  -2  -1  137.61    5.48
  -2   2   1  133.43    5.41
  -2   2   1  128.93    5.42
  -2   2   1  138.59    5.48
   3  -2  -1   23.18    0.96
   3  -2  -1   23.85    1.09
   3  -2  -1   22.45    0.97
   3  -2  -1   23.83    1.00
   3  -2  -1   22.50    0.96
   3  -2  -1   21.09    0.97
   3  -2  -1   21.97    0.96
   3  -2  -1   22.88    1.04
  -3   2   1   22.89    0.98
  -3   2   1   22.57    0.97
  -3   2   1   21.05    0.93
  -3   2   1   23.05    0.95
  -3   2   1   22.15    0.97
   4  -2  -1   40.10    1.69
   4  -2  -1   41.75    1.71
   4  -2  -1   40.33    1.90
   4  -2  -1   40.65    1.72
   4  -2  -1   40.59    1.74
   4  -2  -1   39.78    1.76
  -4   2   1   40.24    1.68
  -4   2   1   41.57    1.74
  -4   2   1   41.22    1.71
  -4   2   1   42.24    1.75
  -4   2   1   41.95    1.74
  -4   2   1   39.08    1.67
   5  -2  -1    0.94    0.23
   5  -2  -1    1.18    0.17
   5  -2  -1    1.19    0.14
   5  -2  -1    1.04    0.13
   5  -2  -1    1.36    0.17
   5  -2  -1    0.99    0.11
   5  -2  -1    1.09    0.12
   5  -2  -1    1.04    0.13
   5  -2  -1    1.09    0.12
   5  -2  -1    1.14    0.14
   5  -2  -1    0.95    0.13
   5  -2  -1    1.18    0.15
   5  -2  -1    1.26    0.16
  -5   2   1    0.91    0.18
  -5   2   1    1.20    0.16
  -5   2   1    1.31    0.13
  -5   2   1    1.22    0.19
  -5   2   1    1.14    0.15
  -5   2   1    1.32    0.16
  -5   2   1    1.59    0.18
   6  -2  -1    2.34    0.18
   6  -2  -1    2.28    0.15
   6  -2  -1    2.32    0.20
   6  -2  -1    2.27    0.16
   6  -2  -1    2.39    0.16
   6  -2  -1    2.29    0.15
   6  -2  -1    2.13    0.15
   6  -2  -1    2.20    0.17
   6  -2  -1    2.46    0.17
  -6   2   1    1.97    0.17
  -6   2   1    2.22    0.21
  -6  -2  -2    1.36    0.13
  -6  -2  -2    1.39    0.13
   6   2   2    1.38    0.15
   6   2   2    1.48    0.12
   6   2   2    1.18    0.12
   6   2   2    1.47    0.13
  -5  -2  -2    3.25    0.23
  -5  -2  -2    3.40    0.27
  -5  -2  -2    3.10    0.20
   5   2   2    2.91    0.21
   5   2   2    2.41    0.33
   5   2   2    3.51    0.23
   5   2   2    3.75    0.28
   5   2   2    3.31    0.22
   5   2   2    3.41    0.23
  -4  -2  -2    2.76    0.23
  -4  -2  -2    2.57    0.20
  -4  -2  -2    2.67    0.19
   4   2   2    2.56    0.19
   4   2   2    2.64    0.39
   4   2   2    2.76    0.33
  -3  -2  -2    0.31    0.08
  -3  -2  -2    0.43    0.08
  -3  -2  -2    0.40    0.09
   3   2   2    0.49    0.15
   3   2   2    0.70    0.11
   3   2   2    0.93    0.22
  -2  -2  -2    0.20    0.08
  -2  -2  -2    0.08    0.04
   2   2   2    0.04    0.08
   2   2   2    0.09    0.10
   2   2   2    0.09    0.05
  -1  -2  -2  149.71    6.15
  -1  -2  -2  151.47    6.14
   1   2   2  158.40    6.26
   1   2   2  158.22    6.17
   0  -2  -2   25.28    1.01
   0   2   2   23.96    1.00
   1  -2  -2    2.28    0.12
   1  -2  -2    2.27    0.12
   1  -2  -2    2.34    0.12
   1  -2  -2    2.23    0.13
  -1   2   2    2.13    0.12
   2  -2  -2    1.31    0.10
   2  -2  -2    1.34    0.13
   2  -2  -2    1.27    0.10
   2  -2  -2    1.46    0.11
  -2   2   2    1.17    0.09
   3  -2  -2    6.88    0.34
   3  -2  -2    6.34    0.33
   3  -2  -2    7.27    0.45
   3  -2  -2    6.63    0.33
   3  -2  -2    6.75    0.33
   3  -2  -2    6.76    0.35
   3  -2  -2    6.59    0.35
  -3   2   2    6.52    0.33
  -3   2   2    6.22    0.29
  -3   2   2    6.12    0.31
  -3   2   2    6.64    0.34
  -3   2   2    6.28    0.32
   4  -2  -2   24.44    1.16
   4  -2  -2   26.27    1.14
   4  -2  -2   24.94    1.27
   4  -2  -2   26.29    1.11
   4  -2  -2   25.21    1.11
   4  -2  -2   25.41    1.09
  -4   2   2   26.44    1.21
  -4   2   2   24.68    1.07
  -4   2   2   23.15    1.06
  -4   2   2   28.14    1.15
  -4   2   2   26.82    1.14
  -4   2   2   25.88    1.13
   5  -2  -2    0.77    0.13
   5  -2  -2    0.62    0.12
   5  -2  -2    1.10    0.12
   5  -2  -2    0.91    0.12
   5  -2  -2    0.85    0.12
   5  -2  -2    0.70    0.14
   5  -2  -2    0.82    0.10
   5  -2  -2    0.87    0.11
   5  -2  -2    1.07    0.15
   5  -2  -2    0.85    0.12
   5  -2  -2    0.90    0.13
   5  -2  -2    0.94    0.22
   5  -2  -2    0.66    0.10
  -5   2   2    0.76    0.16
  -5   2   2    0.97    0.11
  -5   2   2    1.07    0.14
  -5   2   2    0.89    0.14
  -5   2   2    0.94    0.14
  -5   2   2    1.30    0.19
   6  -2  -2    6.09    0.30
   6  -2  -2    6.28    0.31
   6  -2  -2    6.39    0.32
   6  -2  -2    6.12    0.30
   6  -2  -2    5.66    0.33
   6  -2  -2    6.01    0.31
   6  -2  -2    6.24    0.29
   6  -2  -2    5.53    0.32
   6  -2  -2    5.81    0.34
  -6   2   2    6.07    0.34
  -6   2   2    5.86    0.31
  -6  -2  -3    0.04    0.13
  -6  -2  -3    0.03    0.05
   6   2   3   -0.04    0.05
   6   2   3    0.03    0.04
   6   2   3    0.03    0.07
  -5  -2  -3    4.72    0.28
  -5  -2  -3    4.95    0.32
  -5  -2  -3    4.81    0.27
   5   2   3    4.66    0.28
   5   2   3    4.51    0.26
   5   2   3    5.14    0.33
   5   2   3    4.92    0.28
   5   2   3    4.42    0.27
  -4  -2  -3    1.22    0.15
  -4  -2  -3    1.41    0.19
  -4  -2  -3    1.54    0.16
   4   2   3    1.20    0.32
   4   2   3    1.26    0.14
   4   2   3    1.19    0.25
  -3  -2  -3    2.35    0.19
  -3  -2  -3    2.27    0.17
  -3  -2  -3    2.32    0.17
   3   2   3    2.23    0.27
   3   2   3    1.85    0.20
   3   2   3    2.13    0.33
  -2  -2  -3    8.76    0.43
  -2  -2  -3    8.45    0.41
  -2  -2  -3    8.24    0.40
   2   2   3    8.71    0.60
   2   2   3    8.96    0.45
   2   2   3    9.91    0.51
  -1  -2  -3    0.65    0.07
  -1  -2  -3    0.61    0.06
   1   2   3    0.75    0.16
   1   2   3    0.62    0.08
   1   2   3    0.58    0.08
   0  -2  -3   79.39    3.09
   0  -2  -3   75.74    3.09
   0   2   3   72.37    3.08
   0   2   3   80.26    3.10
   1  -2  -3   13.01    0.53
   1  -2  -3   12.30    0.52
   1  -2  -3   12.34    0.54
   1  -2  -3   11.89    0.51
  -1   2   3   12.34    0.53
  -1   2   3   11.10    0.51
   2  -2  -3   21.15    0.86
   2  -2  -3   20.12    0.86
   2  -2  -3   20.36    0.91
  -2   2   3   19.28    0.86
   3  -2  -3    0.01    0.05
   3  -2  -3    0.27    0.08
   3  -2  -3    0.03    0.07
   3  -2  -3    0.02    0.06
   3  -2  -3    0.05    0.05
   3  -2  -3    0.24    0.07
  -3   2   3    0.04    0.04
  -3   2   3    0.03    0.04
  -3   2   3   -0.01    0.05
  -3   2   3    0.08    0.03
  -3   2   3    0.06    0.05
  -3   2   3    0.00    0.04
   4  -2  -3   12.17    0.56
   4  -2  -3   12.37    0.58
   4  -2  -3   12.23    0.54
   4  -2  -3   11.43    0.55
   4  -2  -3   12.35    0.59
   4  -2  -3   11.01    0.60
   4  -2  -3   12.45    0.57
  -4   2   3   11.48    0.52
  -4   2   3   11.50    0.57
  -4   2   3   11.28    0.58
  -4   2   3   12.14    0.59
  -4   2   3   11.04    0.51
  -4   2   3   12.21    0.56
   5  -2  -3    0.17    0.08
   5  -2  -3    0.20    0.07
   5  -2  -3    0.10    0.07
   5  -2  -3    0.14    0.08
   5  -2  -3    0.14    0.07
   5  -2  -3    0.12    0.07
   5  -2  -3    0.13    0.06
   5  -2  -3    0.13    0.08
   5  -2  -3    0.19    0.07
   5  -2  -3    0.16    0.08
   5  -2  -3    0.15    0.09
  -5   2   3    0.09    0.08
  -5   2   3    0.17    0.08
  -5   2   3    0.13    0.07
  -5   2   3    0.08    0.10
  -5   2   3    0.17    0.09
  -5   2   3    0.14    0.08
   6  -2  -3   22.15    0.92
   6  -2  -3   21.41    0.92
   6  -2  -3   20.90    0.96
   6  -2  -3   21.09    0.95
   6  -2  -3   21.96    0.93
   6  -2  -3   21.70    0.94
   6  -2  -3   23.05    0.94
   6  -2  -3   21.81    0.91
   6  -2  -3   18.84    0.95
  -6   2   3   23.26    0.97
  -6   2   3   22.61    0.95
  -6   2   3   21.90    0.95
  -6   2   3   22.39    0.96
  -6   2   3   21.34    0.93
  -5  -2  -4    0.06    0.07
  -5  -2  -4    0.57    0.11
  -5  -2  -4   -0.01    0.07
   5   2   4    0.09    0.06
   5   2   4    0.13    0.08
   5   2   4    0.15    0.09
   5   2   4    0.01    0.04
  -4  -2  -4    0.29    0.08
  -4  -2  -4    0.37    0.09
  -4  -2  -4    0.28    0.10
  -4  -2  -4    0.46    0.11
   4   2   4    0.30    0.09
   4   2   4    0.18    0.10
   4   2   4    0.36    0.08
   4   2   4    0.37    0.09
  -3  -2  -4  101.74    4.04
  -3  -2  -4   99.51    3.99
   3   2   4   94.67    4.41
  -2  -2  -4    0.48    0.09
  -2  -2  -4    0.42    0.08
  -2  -2  -4    0.33    0.07
   2   2   4    0.40    0.16
   2   2   4    0.47    0.13
   2   2   4    0.35    0.09
  -1  -2  -4   29.69    1.26
  -1  -2  -4   29.56    1.24
  -1  -2  -4   31.44    1.26
  -1  -2  -4   29.38    1.24
   1   2   4   30.72    1.31
   1   2   4   32.40    1.45
   1   2   4   31.16    1.28
   1   2   4   26.64    1.26
   0  -2  -4    2.51    0.16
   0   2   4    2.50    0.21
   0   2   4    2.66    0.15
   0   2   4    2.62    0.17
   0   2   4    2.67    0.16
   1  -2  -4  240.24    9.38
   1  -2  -4  236.80    9.36
  -1   2   4  239.38    9.38
  -1   2   4  224.81    9.35
   2  -2  -4    9.40    0.43
   2  -2  -4    9.88    0.42
   2  -2  -4    9.61    0.44
   2  -2  -4    9.61    0.43
   2  -2  -4    9.97    0.44
   2  -2  -4    9.33    0.48
   2  -2  -4    9.34    0.43
  -2   2   4    9.11    0.44
  -2   2   4    8.21    0.41
   3  -2  -4   34.59    1.40
   3  -2  -4   34.76    1.43
   3  -2  -4   35.05    1.41
   3  -2  -4   34.81    1.41
   3  -2  -4   33.58    1.45
   3  -2  -4   35.69    1.42
   3  -2  -4   35.19    1.43
  -3   2   4   31.41    1.37
  -3   2   4   32.71    1.40
  -3   2   4   33.61    1.40
  -3   2   4   31.27    1.39
   4  -2  -4    1.57    0.16
   4  -2  -4    1.42    0.15
   4  -2  -4    1.79    0.14
   4  -2  -4    1.63    0.15
   4  -2  -4    1.49    0.14
   4  -2  -4    1.52    0.15
   4  -2  -4    1.46    0.16
  -4   2   4    1.48    0.16
  -4   2   4    1.50    0.16
  -4   2   4    1.36    0.11
  -4   2   4    1.56    0.16
  -4   2   4    1.54    0.15
   5  -2  -4    0.56    0.11
   5  -2  -4    0.49    0.11
   5  -2  -4    0.33    0.09
   5  -2  -4    0.47    0.10
   5  -2  -4    0.28    0.09
   5  -2  -4    0.37    0.10
   5  -2  -4    0.57    0.12
   5  -2  -4    0.46    0.09
   5  -2  -4    0.43    0.10
   5  -2  -4    0.31    0.08
   5  -2  -4    0.35    0.08
  -5   2   4    0.54    0.13
  -5   2   4    0.39    0.11
  -5   2   4    0.44    0.13
  -5   2   4    0.59    0.11
  -5   2   4    0.43    0.09
  -5   2   4    0.39    0.09
   6  -2  -4    2.29    0.18
   6  -2  -4    2.37    0.16
   6  -2  -4    2.64    0.18
   6  -2  -4    2.65    0.17
   6  -2  -4    2.47    0.16
   6  -2  -4    2.50    0.21
   6  -2  -4    1.89    0.23
   6  -2  -4    2.35    0.17
  -6   2   4    2.61    0.22
  -6   2   4    2.66    0.20
  -6   2   4    2.49    0.24
  -6   2   4    2.52    0.20
  -5  -2  -5    3.81    0.22
  -5  -2  -5    3.59    0.24
  -5  -2  -5    3.56    0.22
   5   2   5    3.67    0.22
   5   2   5    3.59    0.25
   5   2   5    3.89    0.21
  -4  -2  -5    4.62    0.28
  -4  -2  -5    4.11    0.28
  -4  -2  -5    4.05    0.26
  -4  -2  -5    4.51    0.30
   4   2   5    4.30    0.26
   4   2   5    4.64    0.31
   4   2   5    4.36    0.26
   4   2   5    3.69    0.25
  -3  -2  -5    3.83    0.23
  -3  -2  -5    3.49    0.26
  -3  -2  -5    3.78    0.24
   3   2   5    2.82    0.42
   3   2   5    3.70    0.22
  -2  -2  -5    6.53    0.35
  -2  -2  -5    6.33    0.32
   2   2   5    6.62    0.41
   2   2   5    5.19    0.36
   2   2   5    5.91    0.55
  -1  -2  -5   47.85    1.88
  -1  -2  -5   46.76    1.90
  -1  -2  -5   45.53    1.89
  -1  -2  -5   45.01    1.87
   1   2   5   45.08    1.92
   1   2   5   42.51    1.89
   1   2   5   45.98    2.12
   1   2   5   47.88    1.96
   0  -2  -5    1.37    0.13
   0  -2  -5    1.32    0.10
   0  -2  -5    1.29    0.11
   0  -2  -5    1.23    0.09
   0  -2  -5    1.25    0.13
   0  -2  -5    1.26    0.11
   0   2   5    1.23    0.14
   0   2   5    1.38    0.13
   0   2   5    1.41    0.13
   0   2   5    1.41    0.14
   0   2   5    1.36    0.13
   1  -2  -5   28.67    1.21
   1  -2  -5   27.06    1.23
   1  -2  -5   29.71    1.21
   1  -2  -5   28.82    1.18
   1  -2  -5   27.31    1.19
   1  -2  -5   28.75    1.18
   1  -2  -5   28.70    1.19
  -1   2   5   27.72    1.23
  -1   2   5   30.12    1.24
  -1   2   5   30.94    1.20
  -1   2   5   28.02    1.21
  -1   2   5   28.36    1.19
   2  -2  -5    0.11    0.06
   2  -2  -5    0.12    0.05
   2  -2  -5    0.13    0.06
   2  -2  -5    0.14    0.06
   2  -2  -5    0.15    0.06
  -2   2   5    0.34    0.07
  -2   2   5    0.11    0.05
   3  -2  -5   27.91    1.17
   3  -2  -5   29.12    1.17
   3  -2  -5   28.84    1.18
   3  -2  -5   26.41    1.21
   3  -2  -5   27.15    1.16
   3  -2  -5   28.96    1.18
   3  -2  -5   29.56    1.20
   3  -2  -5   27.84    1.19
  -3   2   5   28.84    1.17
  -3   2   5   24.72    1.16
  -3   2   5   27.73    1.15
  -3   2   5   26.62    1.18
   4  -2  -5    0.07    0.07
   4  -2  -5    0.05    0.07
   4  -2  -5    0.17    0.08
   4  -2  -5    0.05    0.06
   4  -2  -5    0.02    0.05
   4  -2  -5    0.07    0.06
   4  -2  -5    0.02    0.06
  -4   2   5    0.00    0.05
  -4   2   5    0.05    0.05
  -4   2   5    0.12    0.07
  -4   2   5    0.06    0.06
  -4   2   5    0.10    0.07
  -4   2   5    0.03    0.07
   5  -2  -5    2.78    0.21
   5  -2  -5    2.89    0.19
   5  -2  -5    2.75    0.23
   5  -2  -5    2.49    0.21
   5  -2  -5    2.88    0.22
   5  -2  -5    2.98    0.21
   5  -2  -5    2.82    0.24
   5  -2  -5    2.50    0.20
   5  -2  -5    2.46    0.18
   5  -2  -5    2.75    0.23
   5  -2  -5    2.90    0.19
  -5   2   5    3.09    0.21
  -5   2   5    2.87    0.23
  -5   2   5    2.82    0.19
  -5   2   5    2.85    0.20
  -5   2   5    2.75    0.22
  -5   2   5    2.80    0.24
   6  -2  -5    0.17    0.07
   6  -2  -5    0.24    0.08
   6  -2  -5    0.31    0.07
   6  -2  -5    0.24    0.07
   6  -2  -5    0.25    0.07
   6  -2  -5    0.26    0.07
   6  -2  -5    0.23    0.11
  -6   2   5    0.29    0.09
  -5  -2  -6    2.54    0.20
  -5  -2  -6    2.84    0.17
   5   2   6    3.20    0.16
  -4  -2  -6    2.85    0.22
  -4  -2  -6    2.47    0.21
  -4  -2  -6    2.56    0.20
   4   2   6    2.81    0.19
   4   2   6    2.70    0.18
   4   2   6    2.30    0.22
   4   2   6    2.55    0.20
  -3  -2  -6    0.03    0.07
  -3  -2  -6    0.03    0.06
  -3  -2  -6    0.20    0.07
  -3  -2  -6    0.08    0.06
  -3  -2  -6    0.08    0.08
   3   2   6   -0.02    0.06
   3   2   6    0.04    0.06
   3   2   6    0.12    0.07
  -2  -2  -6    6.82    0.38
  -2  -2  -6    7.26    0.35
  -2  -2  -6    6.37    0.34
  -2  -2  -6    5.96    0.35
   2   2   6    6.77    0.34
   2   2   6    7.28    0.45
   2   2   6    5.95    0.59
  -1  -2  -6   69.12    2.80
  -1  -2  -6   69.68    2.81
  -1  -2  -6   70.42    2.77
  -1  -2  -6   70.06    2.78
   1   2   6   60.13    3.17
   1   2   6   67.71    2.81
   1   2   6   69.73    2.88
   0  -2  -6    2.22    0.17
   0  -2  -6    2.09    0.16
   0  -2  -6    2.30    0.17
   0  -2  -6    2.14    0.15
   0  -2  -6    2.12    0.14
   0   2   6    2.30    0.18
   0   2   6    2.01    0.15
   0   2   6    2.22    0.19
   0   2   6    2.19    0.18
   0   2   6    2.27    0.19
   0   2   6    1.90    0.19
   0   2   6    2.15    0.18
   1  -2  -6    7.83    0.39
   1  -2  -6    7.70    0.40
   1  -2  -6    7.68    0.38
   1  -2  -6    7.59    0.37
   1  -2  -6    7.49    0.38
   1  -2  -6    7.53    0.36
  -1   2   6    8.07    0.38
  -1   2   6    8.67    0.43
  -1   2   6    8.30    0.40
  -1   2   6    7.45    0.40
  -1   2   6    8.18    0.40
  -1   2   6    7.18    0.42
   2  -2  -6    0.24    0.07
   2  -2  -6    0.50    0.10
   2  -2  -6    0.32    0.07
   2  -2  -6    0.34    0.08
   2  -2  -6    0.28    0.10
   2  -2  -6    0.27    0.07
  -2   2   6    0.45    0.09
  -2   2   6    0.41    0.07
  -2   2   6    0.43    0.09
  -2   2   6    0.34    0.09
  -2   2   6    0.38    0.07
  -2   2   6    0.31    0.08
   3  -2  -6    3.56    0.22
   3  -2  -6    3.83    0.23
   3  -2  -6    3.58    0.24
   3  -2  -6    3.37    0.22
   3  -2  -6    3.49    0.22
  -3   2   6    3.84    0.23
  -3   2   6    3.52    0.22
  -3   2   6    3.56    0.23
  -3   2   6    3.11    0.19
  -3   2   6    3.16    0.20
   4  -2  -6    0.56    0.12
   4  -2  -6    0.51    0.12
   4  -2  -6    0.39    0.09
   4  -2  -6    0.43    0.09
   4  -2  -6    0.38    0.09
   4  -2  -6    0.36    0.08
   4  -2  -6    0.46    0.11
  -4   2   6    0.37    0.09
  -4   2   6    0.34    0.10
  -4   2   6    0.51    0.09
  -4   2   6    0.36    0.10
  -4   2   6    0.31    0.10
  -4   2   6    0.42    0.09
  -4   2   6    0.46    0.12
   5  -2  -6   16.37    0.70
   5  -2  -6   16.36    0.82
   5  -2  -6   15.77    0.74
   5  -2  -6   15.56    0.77
   5  -2  -6   14.98    0.74
   5  -2  -6   16.77    0.76
   5  -2  -6   15.90    0.75
   5  -2  -6   16.78    0.74
   5  -2  -6   15.96    0.70
   5  -2  -6   16.33    0.73
   5  -2  -6   16.31    0.72
  -5   2   6   16.44    0.74
  -5   2   6   15.58    0.73
  -5   2   6   16.83    0.81
  -5   2   6   16.06    0.72
  -5   2   6   16.26    0.74
   6  -2  -6    7.83    0.41
   6  -2  -6    8.13    0.38
   6  -2  -6    7.78    0.40
   6  -2  -6    8.21    0.38
   6  -2  -6    7.86    0.39
   6  -2  -6    8.34    0.37
  -6   2   6    8.42    0.41
  -4  -2  -7    9.40    0.46
  -4  -2  -7   10.09    0.47
   4   2   7    9.91    0.46
   4   2   7   10.13    0.44
   4   2   7    8.05    0.44
  -3  -2  -7    3.66    0.24
  -3  -2  -7    3.28    0.30
  -3  -2  -7    3.40    0.25
  -3  -2  -7    3.48    0.23
   3   2   7    3.52    0.22
   3   2   7    3.65    0.23
   3   2   7    3.22    0.23
  -2  -2  -7    0.18    0.10
  -2  -2  -7    0.32    0.09
   2   2   7    0.30    0.13
   2   2   7    0.23    0.07
  -1  -2  -7   27.83    1.24
  -1  -2  -7   29.64    1.25
  -1  -2  -7   29.91    1.29
   1   2   7   28.50    1.28
   1   2   7   31.02    1.38
   1   2   7   28.86    1.24
   0  -2  -7    2.37    0.20
   0  -2  -7    2.37    0.17
   0  -2  -7    2.38    0.17
   0  -2  -7    2.50    0.19
   0  -2  -7    2.02    0.18
   0   2   7    2.35    0.21
   0   2   7    2.29    0.17
   0   2   7    2.02    0.21
   0   2   7    2.42    0.21
   0   2   7    2.26    0.17
   0   2   7    2.19    0.23
   0   2   7    2.48    0.21
   1  -2  -7   20.48    0.90
   1  -2  -7   20.80    0.93
   1  -2  -7   20.40    0.89
   1  -2  -7   20.03    0.91
   1  -2  -7   21.50    0.94
   1  -2  -7   20.54    0.91
  -1   2   7   20.98    0.91
  -1   2   7   20.86    0.95
  -1   2   7   21.30    0.95
  -1   2   7   21.97    0.94
  -1   2   7   21.33    0.91
  -1   2   7   20.47    0.98
  -1   2   7   20.74    0.98
   2  -2  -7   12.11    0.54
   2  -2  -7   11.49    0.54
   2  -2  -7   12.12    0.57
   2  -2  -7   11.29    0.57
   2  -2  -7   11.66    0.55
   2  -2  -7   11.34    0.55
  -2   2   7   11.50    0.57
  -2   2   7   11.49    0.61
  -2   2   7   11.60    0.56
  -2   2   7   11.39    0.55
  -2   2   7   12.22    0.57
  -2   2   7   11.91    0.54
   3  -2  -7    0.52    0.10
   3  -2  -7    0.59    0.11
   3  -2  -7    0.54    0.09
   3  -2  -7    0.38    0.10
   3  -2  -7    0.45    0.09
   3  -2  -7    0.36    0.08
  -3   2   7    0.35    0.09
  -3   2   7    0.49    0.09
  -3   2   7    0.77    0.12
  -3   2   7    0.37    0.10
  -3   2   7    0.48    0.09
   4  -2  -7    3.99    0.26
   4  -2  -7    4.17    0.26
   4  -2  -7    4.62    0.27
   4  -2  -7    4.36    0.30
   4  -2  -7    4.08    0.25
   4  -2  -7    4.20    0.26
   4  -2  -7    3.94    0.26
   4  -2  -7    3.99    0.23
   4  -2  -7    5.06    0.29
   4  -2  -7    3.76    0.24
   4  -2  -7    3.45    0.27
  -4   2   7    4.00    0.26
  -4   2   7    4.32    0.24
  -4   2   7    4.14    0.26
  -4   2   7    3.68    0.27
  -4   2   7    3.58    0.27
  -4   2   7    4.25    0.28
   5  -2  -7    0.00    0.07
   5  -2  -7    0.04    0.06
   5  -2  -7    0.07    0.05
   5  -2  -7    0.02    0.06
   5  -2  -7    0.06    0.06
   5  -2  -7   -0.02    0.05
   5  -2  -7    0.04    0.07
  -5   2   7    0.06    0.07
  -5   2   7   -0.08    0.07
  -5   2   7   -0.10    0.14
  -5   2   7    0.04    0.09
   6  -2  -7    3.26    0.19
   6  -2  -7    3.10    0.18
   6  -2  -7    2.86    0.22
   6  -2  -7    3.08    0.19
   6  -2  -7    2.81    0.25
   6  -2  -7    3.41    0.18
   6  -2  -7    2.71    0.19
  -6   2   7    3.35    0.23
  -6   2   7    3.15    0.19
  -4  -2  -8    5.92    0.31
   4   2   8    6.53    0.29
  -3  -2  -8    1.09    0.13
  -3  -2  -8    0.94    0.14
  -3  -2  -8    1.08    0.12
   3   2   8    0.90    0.11
   3   2   8    1.11    0.14
   3   2   8    1.23    0.13
  -2  -2  -8   28.34    1.17
  -2  -2  -8   26.68    1.21
  -2  -2  -8   27.41    1.17
  -2  -2  -8   25.27    1.16
  -2  -2  -8   27.48    1.18
   2   2   8   28.42    1.32
   2   2   8   27.91    1.17
   2   2   8   25.51    1.18
   2   2   8   28.01    1.17
  -1  -2  -8    1.63    0.18
  -1  -2  -8    1.45    0.15
  -1  -2  -8    1.69    0.15
   1   2   8    1.47    0.15
   1   2   8    1.58    0.25
   1   2   8    1.60    0.25
   0  -2  -8   27.08    1.20
   0  -2  -8   26.37    1.16
   0  -2  -8   26.38    1.16
   0  -2  -8   27.50    1.17
   0   2   8   27.48    1.20
   0   2   8   29.17    1.23
   0   2   8   26.94    1.17
   0   2   8   25.80    1.28
   1  -2  -8    2.15    0.17
   1  -2  -8    2.25    0.18
   1  -2  -8    2.28    0.21
   1  -2  -8    2.21    0.18
   1  -2  -8    2.15    0.18
  -1   2   8    2.05    0.21
  -1   2   8    2.44    0.19
  -1   2   8    2.22    0.21
  -1   2   8    2.25    0.18
  -1   2   8    2.70    0.21
  -1   2   8    2.22    0.20
  -1   2   8    2.42    0.25
   2  -2  -8    3.29    0.21
   2  -2  -8    3.31    0.25
   2  -2  -8    3.35    0.22
   2  -2  -8    3.17    0.22
   2  -2  -8    3.11    0.22
   2  -2  -8    2.91    0.21
  -2   2   8    3.14    0.25
  -2   2   8    3.16    0.23
  -2   2   8    3.49    0.25
  -2   2   8    2.93    0.25
  -2   2   8    3.26    0.22
  -2   2   8    3.41    0.25
   3  -2  -8    2.36    0.20
   3  -2  -8    2.52    0.19
   3  -2  -8    2.54    0.19
   3  -2  -8    2.41    0.19
   3  -2  -8    2.71    0.21
  -3   2   8    2.58    0.21
  -3   2   8    2.00    0.21
  -3   2   8    2.40    0.20
  -3   2   8    2.66    0.20
  -3   2   8    2.82    0.21
  -3   2   8    2.48    0.22
   4  -2  -8    0.34    0.09
   4  -2  -8    0.37    0.09
   4  -2  -8    0.41    0.11
   4  -2  -8    0.34    0.08
   4  -2  -8    0.31    0.09
   4  -2  -8    0.27    0.09
   4  -2  -8    0.46    0.11
   4  -2  -8    0.35    0.09
   4  -2  -8    0.44    0.11
   4  -2  -8    0.43    0.10
   4  -2  -8    0.35    0.08
  -4   2   8    0.31    0.11
  -4   2   8    0.24    0.09
  -4   2   8    0.42    0.09
  -4   2   8    0.43    0.10
  -4   2   8    0.24    0.09
  -4   2   8    0.24    0.10
   5  -2  -8   11.29    0.56
   5  -2  -8   12.09    0.56
   5  -2  -8   12.12    0.52
   5  -2  -8   11.84    0.53
   5  -2  -8   11.93    0.55
   5  -2  -8   11.84    0.54
   5  -2  -8   11.73    0.58
  -5   2   8   11.08    0.56
  -5   2   8   10.88    0.53
   6  -2  -8    1.78    0.14
   6  -2  -8    1.94    0.14
   6  -2  -8    1.92    0.13
   6  -2  -8    1.65    0.13
   6  -2  -8    1.68    0.16
  -6   2   8    1.93    0.13
  -3  -2  -9    3.62    0.20
  -3  -2  -9    3.07    0.21
   3   2   9    3.42    0.27
   3   2   9    3.77    0.20
  -2  -2  -9   12.69    0.56
  -2  -2  -9   11.90    0.55
  -2  -2  -9   10.78    0.54
   2   2   9   12.33    0.56
   2   2   9   11.40    0.56
   2   2   9   12.45    0.56
  -1  -2  -9    0.48    0.09
  -1  -2  -9    0.60    0.10
  -1  -2  -9    0.65    0.11
  -1  -2  -9    0.70    0.10
  -1  -2  -9    0.95    0.12
  -1  -2  -9    0.73    0.11
   1   2   9    0.72    0.12
   1   2   9    0.61    0.11
   1   2   9    0.72    0.20
   1   2   9    0.61    0.12
   1   2   9    0.88    0.11
   0  -2  -9    1.76    0.17
   0  -2  -9    2.31    0.20
   0  -2  -9    1.83    0.17
   0  -2  -9    2.07    0.17
   0  -2  -9    1.87    0.17
   0  -2  -9    1.94    0.19
   0   2   9    2.25    0.17
   0   2   9    1.73    0.20
   0   2   9    1.85    0.21
   0   2   9    2.09    0.20
   0   2   9    1.79    0.24
   1  -2  -9    2.14    0.18
   1  -2  -9    2.41    0.20
   1  -2  -9    2.78    0.23
   1  -2  -9    2.67    0.20
   1  -2  -9    2.74    0.23
   1  -2  -9    2.63    0.20
   1  -2  -9    2.25    0.20
   1  -2  -9    2.28    0.20
   1  -2  -9    3.09    0.25
   1  -2  -9    2.54    0.20
   1  -2  -9    2.76    0.30
   1  -2  -9    2.68    0.20
  -1   2   9    1.96    0.25
  -1   2   9    2.56    0.24
  -1   2   9    2.61    0.21
  -1   2   9    2.53    0.24
  -1   2   9    2.20    0.20
  -1   2   9    2.53    0.24
  -1   2   9    2.72    0.24
  -1   2   9    2.51    0.24
   2  -2  -9   18.08    0.83
   2  -2  -9   18.84    0.81
   2  -2  -9   16.59    0.77
   2  -2  -9   16.44    0.76
   2  -2  -9   16.95    0.83
   2  -2  -9   17.54    0.80
   2  -2  -9   16.66    0.78
   2  -2  -9   15.78    0.76
   2  -2  -9   17.49    0.80
   2  -2  -9   17.24    0.78
   2  -2  -9   16.30    0.78
  -2   2   9   17.31    0.83
  -2   2   9   17.92    0.83
  -2   2   9   17.38    0.78
  -2   2   9   16.62    0.80
  -2   2   9   17.26    0.82
  -2   2   9   16.85    0.79
  -2   2   9   15.99    0.82
   3  -2  -9    0.41    0.10
   3  -2  -9    0.71    0.12
   3  -2  -9    0.53    0.10
   3  -2  -9    0.55    0.09
   3  -2  -9    0.48    0.10
   3  -2  -9    0.67    0.12
   3  -2  -9    0.53    0.11
   3  -2  -9    0.48    0.10
   3  -2  -9    0.58    0.13
   3  -2  -9    0.50    0.12
   3  -2  -9    0.56    0.12
  -3   2   9    0.65    0.13
  -3   2   9    0.44    0.13
  -3   2   9    0.65    0.12
  -3   2   9    0.51    0.15
  -3   2   9    0.56    0.13
   4  -2  -9    0.10    0.08
   4  -2  -9   -0.06    0.07
   4  -2  -9    0.00    0.07
   4  -2  -9   -0.01    0.06
   4  -2  -9   -0.02    0.06
   4  -2  -9    0.09    0.06
   4  -2  -9   -0.06    0.06
   4  -2  -9    0.04    0.07
  -4   2   9    0.04    0.09
  -4   2   9    0.00    0.07
  -4   2   9    0.03    0.19
   5  -2  -9    3.59    0.21
   5  -2  -9    3.44    0.20
   5  -2  -9    3.74    0.21
   5  -2  -9    3.45    0.20
   5  -2  -9    3.37    0.23
   5  -2  -9    3.13    0.21
   5  -2  -9    3.25    0.24
  -5   2   9    3.41    0.24
  -5   2   9    3.36    0.23
  -2  -2 -10    0.62    0.09
  -2  -2 -10    0.67    0.10
   2   2  10    0.84    0.10
   2   2  10    0.71    0.14
  -1  -2 -10    3.17    0.20
  -1  -2 -10    2.61    0.18
  -1  -2 -10    3.31    0.21
  -1  -2 -10    3.25    0.20
   1   2  10    2.86    0.20
   1   2  10    3.37    0.23
   1   2  10    3.43    0.21
   0  -2 -10    7.14    0.39
   0  -2 -10    7.31    0.37
   0  -2 -10    7.33    0.38
   0  -2 -10    6.80    0.38
   0  -2 -10    7.16    0.38
   0   2  10    7.23    0.39
   0   2  10    7.72    0.38
   0   2  10    7.06    0.38
   1  -2 -10    3.99    0.25
   1  -2 -10    3.37    0.22
   1  -2 -10    3.64    0.24
   1  -2 -10    3.63    0.26
   1  -2 -10    3.79    0.34
   1  -2 -10    3.51    0.27
   1  -2 -10    3.77    0.25
  -1   2  10    3.73    0.28
  -1   2  10    3.24    0.40
  -1   2  10    3.40    0.23
  -1   2  10    3.61    0.26
  -1   2  10    4.02    0.40
   2  -2 -10    0.21    0.09
   2  -2 -10   -0.01    0.08
   2  -2 -10    0.20    0.07
   2  -2 -10    0.27    0.10
   2  -2 -10    0.15    0.07
   2  -2 -10    0.19    0.09
   2  -2 -10    0.09    0.08
   2  -2 -10    0.20    0.08
  -2   2  10    0.10    0.11
  -2   2  10    0.16    0.11
  -2   2  10    0.07    0.18
  -2   2  10    0.09    0.13
   3  -2 -10    1.23    0.16
   3  -2 -10    1.35    0.16
   3  -2 -10    1.43    0.14
   3  -2 -10    1.20    0.16
   3  -2 -10    1.84    0.18
   3  -2 -10    1.22    0.15
   3  -2 -10    1.23    0.16
   3  -2 -10    1.25    0.14
  -3   2  10    1.40    0.19
  -3   2  10    1.47    0.19
  -3   2  10    1.29    0.16
   4  -2 -10    2.37    0.20
   4  -2 -10    2.93    0.18
   4  -2 -10    2.70    0.19
   4  -2 -10    2.25    0.20
   4  -2 -10    2.55    0.18
   4  -2 -10    2.79    0.19
   4  -2 -10    2.51    0.20
  -4   2  10    2.81    0.20
  -4   2  10    2.70    0.22
   5  -2 -10    1.13    0.11
   5  -2 -10    1.00    0.09
   5  -2 -10    0.73    0.08
   5  -2 -10    1.07    0.12
   5  -2 -10    0.82    0.12
  -5   2  10    0.83    0.09
  -1  -2 -11    5.12    0.26
  -1  -2 -11    5.13    0.27
   1   2  11    5.40    0.27
   0  -2 -11    5.71    0.30
   0  -2 -11    6.38    0.31
   0  -2 -11    6.21    0.31
   0  -2 -11    5.97    0.30
   0  -2 -11    5.72    0.31
   0   2  11    5.78    0.32
   0   2  11    5.55    0.32
   0   2  11    6.04    0.31
   1  -2 -11    2.42    0.17
   1  -2 -11    2.25    0.18
   1  -2 -11    2.00    0.16
   1  -2 -11    2.24    0.18
   1  -2 -11    2.10    0.17
   1  -2 -11    2.12    0.17
   1  -2 -11    2.50    0.18
  -1   2  11    2.40    0.17
  -1   2  11    2.37    0.20
  -1   2  11    2.34    0.18
  -1   2  11    2.28    0.18
   2  -2 -11    0.08    0.07
   2  -2 -11    0.19    0.08
   2  -2 -11    0.17    0.07
   2  -2 -11    0.11    0.07
   2  -2 -11    0.11    0.07
   2  -2 -11    0.28    0.07
   2  -2 -11    0.20    0.06
   2  -2 -11    0.16    0.07
  -2   2  11    0.17    0.07
  -2   2  11    0.20    0.14
  -2   2  11    0.17    0.10
   3  -2 -11    0.17    0.07
   3  -2 -11    0.13    0.05
   3  -2 -11    0.15    0.06
   3  -2 -11    0.09    0.06
   3  -2 -11    0.02    0.08
   3  -2 -11    0.12    0.07
   3  -2 -11    0.13    0.07
   3  -2 -11    0.10    0.07
  -3   2  11    0.16    0.07
  -3   2  11    0.11    0.15
  -3   2  11    0.06    0.08
   4  -2 -11   12.06    0.56
   4  -2 -11   11.94    0.56
   4  -2 -11   13.55    0.55
   4  -2 -11   13.26    0.55
   4  -2 -11   12.09    0.55
   4  -2 -11   12.11    0.57
  -4   2  11   12.65    0.55
   0  -2 -12    0.13    0.07
   0   2  12    0.09    0.07
   1  -2 -12    2.78    0.17
   1  -2 -12    2.57    0.16
   1  -2 -12    2.46    0.15
   1  -2 -12    2.94    0.17
  -1   2  12    2.57    0.18
  -1   2  12    2.99    0.19
   2  -2 -12    0.62    0.08
   2  -2 -12    0.54    0.09
   2  -2 -12    0.67    0.07
   2  -2 -12    0.54    0.08
   2  -2 -12    0.72    0.10
  -2   2  12    0.81    0.08
  -2   2  12    0.71    0.10
  -2   2  12    0.50    0.10
   3  -2 -12    0.03    0.07
   3  -2 -12    0.00    0.03
   3  -2 -12    0.01    0.04
   3  -2 -12    0.02    0.04
  -3   2  12    0.02    0.08
  -3  -3  12    0.84    0.09
   3   3 -12    0.50    0.07
   3   3 -12    0.78    0.07
  -2  -3  12    0.28    0.05
  -2  -3  12    0.26    0.11
   2   3 -12    0.18    0.06
   2   3 -12    0.27    0.05
   2   3 -12    0.31    0.08
   2   3 -12    0.17    0.08
  -1  -3  12    0.38    0.10
  -1  -3  12    0.47    0.06
   1   3 -12    0.35    0.08
   1   3 -12    0.45    0.06
   1   3 -12    0.24    0.06
   0  -3  12    5.27    0.24
   0   3 -12    5.06    0.26
  -4  -3  11    1.01    0.12
  -4  -3  11    1.39    0.12
  -4  -3  11    1.22    0.10
   4   3 -11    1.01    0.13
   4   3 -11    1.35    0.10
   4   3 -11    1.22    0.11
   4   3 -11    1.35    0.13
   4   3 -11    1.27    0.11
  -3  -3  11    0.17    0.09
  -3  -3  11    0.28    0.08
  -3  -3  11    0.28    0.07
   3   3 -11    0.26    0.06
   3   3 -11    0.13    0.09
   3   3 -11    0.23    0.07
   3   3 -11    0.15    0.07
   3   3 -11    0.26    0.08
   3   3 -11    0.17    0.07
  -2  -3  11   17.97    0.80
  -2  -3  11   17.34    0.78
  -2  -3  11   18.52    0.79
   2   3 -11   17.87    0.78
   2   3 -11   17.58    0.80
   2   3 -11   18.47    0.82
   2   3 -11   18.40    0.78
  -1  -3  11    0.89    0.12
  -1  -3  11    1.00    0.11
   1   3 -11    0.80    0.12
   1   3 -11    0.74    0.09
   1   3 -11    0.76    0.10
   1   3 -11    0.81    0.10
   0  -3  11   14.60    0.66
   0  -3  11   15.22    0.65
   0   3 -11   15.58    0.66
   0   3 -11   14.08    0.66
   0   3 -11   14.79    0.65
   1  -3  11    5.10    0.25
   1  -3  11    5.13    0.28
  -1   3 -11    4.73    0.31
  -1   3 -11    5.34    0.26
  -5  -3  10    0.03    0.08
  -5  -3  10    0.03    0.04
   5   3 -10   -0.04    0.04
   5   3 -10    0.01    0.08
   5   3 -10    0.01    0.09
   5   3 -10   -0.01    0.04
  -4  -3  10    1.48    0.12
  -4  -3  10    1.17    0.21
  -4  -3  10    1.13    0.14
   4   3 -10    0.93    0.13
   4   3 -10    1.29    0.12
   4   3 -10    1.34    0.14
   4   3 -10    1.07    0.12
   4   3 -10    1.30    0.12
   4   3 -10    1.10    0.13
  -3  -3  10    1.21    0.21
  -3  -3  10    1.46    0.16
  -3  -3  10    1.43    0.13
   3   3 -10    1.53    0.15
   3   3 -10    1.39    0.15
   3   3 -10    1.54    0.15
   3   3 -10    1.33    0.16
   3   3 -10    1.36    0.13
   3   3 -10    1.56    0.16
  -2  -3  10   15.90    0.70
  -2  -3  10   14.21    0.66
  -2  -3  10   15.01    0.68
   2   3 -10   14.81    0.67
   2   3 -10   13.60    0.67
   2   3 -10   14.45    0.65
   2   3 -10   15.98    0.70
   2   3 -10   14.93    0.72
  -1  -3  10    1.18    0.14
  -1  -3  10    1.35    0.15
   1   3 -10    1.28    0.15
   1   3 -10    1.26    0.13
   1   3 -10    1.26    0.16
   1   3 -10    1.82    0.15
   0  -3  10    0.11    0.07
   0  -3  10    0.02    0.06
   0   3 -10   -0.05    0.07
   0   3 -10    0.03    0.06
   0   3 -10   -0.04    0.06
   0   3 -10   -0.03    0.06
   1  -3  10    0.21    0.07
   1  -3  10    0.13    0.06
  -1   3 -10    0.15    0.06
  -1   3 -10    0.19    0.06
  -1   3 -10    0.21    0.07
   2  -3  10    1.09    0.10
   2  -3  10    0.78    0.11
  -2   3 -10    1.09    0.11
  -2   3 -10    0.90    0.09
  -5  -3   9    4.50    0.24
  -5  -3   9    4.42    0.35
  -5  -3   9    4.66    0.26
   5   3  -9    4.62    0.24
   5   3  -9    4.87    0.28
   5   3  -9    4.58    0.26
   5   3  -9    4.42    0.26
   5   3  -9    4.51    0.24
   5   3  -9    4.32    0.25
   5   3  -9    4.83    0.27
   5   3  -9    4.76    0.24
  -4  -3   9    2.46    0.26
  -4  -3   9    2.78    0.26
  -4  -3   9    2.14    0.20
   4   3  -9    2.52    0.20
   4   3  -9    2.45    0.19
   4   3  -9    2.53    0.19
   4   3  -9    2.34    0.20
   4   3  -9    2.29    0.19
   4   3  -9    2.63    0.21
   4   3  -9    2.42    0.18
   4   3  -9    2.16    0.17
  -3  -3   9    1.74    0.19
  -3  -3   9    1.67    0.21
  -3  -3   9    1.43    0.16
  -3  -3   9    1.77    0.21
   3   3  -9    1.45    0.16
   3   3  -9    1.53    0.21
   3   3  -9    1.53    0.18
   3   3  -9    1.80    0.15
   3   3  -9    1.79    0.16
   3   3  -9    1.78    0.16
   3   3  -9    1.55    0.18
   3   3  -9    1.36    0.15
  -2  -3   9   36.98    1.58
  -2  -3   9   35.33    1.50
  -2  -3   9   36.62    1.58
  -2  -3   9   34.78    1.53
  -2  -3   9   37.37    1.58
   2   3  -9   34.44    1.55
   2   3  -9   35.29    1.52
   2   3  -9   38.05    1.57
   2   3  -9   37.20    1.53
   2   3  -9   35.28    1.50
   2   3  -9   35.26    1.51
   2   3  -9   33.78    1.52
   2   3  -9   37.16    1.54
  -1  -3   9    7.30    0.43
  -1  -3   9    6.70    0.36
  -1  -3   9    6.90    0.39
  -1  -3   9    6.28    0.35
   1   3  -9    6.82    0.37
   1   3  -9    6.40    0.36
   1   3  -9    7.36    0.41
   1   3  -9    7.30    0.38
   1   3  -9    7.41    0.39
   1   3  -9    6.56    0.34
   1   3  -9    6.79    0.36
   1   3  -9    6.68    0.38
   0  -3   9    2.25    0.23
   0  -3   9    2.06    0.19
   0  -3   9    2.19    0.18
   0  -3   9    1.73    0.23
   0   3  -9    2.28    0.20
   0   3  -9    1.81    0.16
   0   3  -9    2.02    0.17
   0   3  -9    2.10    0.18
   0   3  -9    1.98    0.19
   0   3  -9    1.83    0.17
   1  -3   9    0.12    0.07
   1  -3   9    0.23    0.07
   1  -3   9    0.17    0.13
  -1   3  -9    0.09    0.07
  -1   3  -9    0.12    0.08
  -1   3  -9    0.10    0.08
  -1   3  -9    0.08    0.07
  -1   3  -9    0.04    0.06
   2  -3   9    2.72    0.19
   2  -3   9    2.53    0.18
  -2   3  -9    3.01    0.19
  -2   3  -9    2.60    0.18
   3  -3   9    0.53    0.07
   3  -3   9    0.55    0.09
  -3   3  -9    0.58    0.08
  -6  -3   8    0.25    0.08
  -6  -3   8   -0.04    0.04
   6   3  -8    0.00    0.04
   6   3  -8    0.00    0.09
   6   3  -8    0.03    0.08
   6   3  -8   -0.03    0.04
  -5  -3   8    8.01    0.40
  -5  -3   8    8.31    0.45
  -5  -3   8    8.08    0.38
   5   3  -8    7.69    0.43
   5   3  -8    8.14    0.41
   5   3  -8    7.89    0.39
   5   3  -8    8.01    0.38
   5   3  -8    8.07    0.42
   5   3  -8    7.59    0.38
   5   3  -8    8.09    0.40
   5   3  -8    8.03    0.38
  -4  -3   8    3.63    0.25
  -4  -3   8    3.23    0.22
  -4  -3   8    3.57    0.30
  -4  -3   8    3.68    0.26
  -4  -3   8    3.09    0.33
  -4  -3   8    3.49    0.25
  -4  -3   8    3.70    0.27
  -4  -3   8    3.51    0.28
  -4  -3   8    3.47    0.25
   4   3  -8    3.36    0.23
   4   3  -8    3.18    0.22
   4   3  -8    3.58    0.27
   4   3  -8    3.36    0.21
   4   3  -8    3.14    0.23
   4   3  -8    3.43    0.25
   4   3  -8    3.89    0.25
   4   3  -8    3.16    0.23
   4   3  -8    3.29    0.24
   4   3  -8    3.55    0.21
   4   3  -8    3.06    0.28
   4   3  -8    3.52    0.26
   4   3  -8    2.95    0.22
  -3  -3   8    0.29    0.12
  -3  -3   8    0.27    0.13
  -3  -3   8    0.34    0.10
  -3  -3   8    0.22    0.15
  -3  -3   8    0.27    0.11
  -3  -3   8    0.30    0.09
  -3  -3   8    0.36    0.13
   3   3  -8    0.30    0.10
   3   3  -8    0.48    0.10
   3   3  -8    0.38    0.11
   3   3  -8    0.33    0.09
   3   3  -8    0.27    0.10
   3   3  -8    0.46    0.13
   3   3  -8    0.43    0.11
   3   3  -8    0.24    0.08
   3   3  -8    0.37    0.10
   3   3  -8    0.26    0.13
  -2  -3   8    1.31    0.18
  -2  -3   8    1.31    0.18
  -2  -3   8    1.36    0.15
  -2  -3   8    1.42    0.17
   2   3  -8    1.74    0.15
   2   3  -8    1.25    0.15
   2   3  -8    1.41    0.14
  -1  -3   8   17.52    0.86
  -1  -3   8   18.34    0.88
   1   3  -8   19.32    0.83
   1   3  -8   18.35    0.82
   0  -3   8    1.76    0.23
   0  -3   8    2.25    0.22
   0   3  -8    1.84    0.16
   0   3  -8    1.96    0.17
   1  -3   8    7.02    0.52
   1  -3   8    6.32    0.47
  -1   3  -8    6.55    0.35
  -1   3  -8    6.41    0.35
   2  -3   8    0.32    0.08
   2  -3   8    0.43    0.16
   2  -3   8    0.38    0.09
  -2   3  -8    0.46    0.09
  -2   3  -8    0.23    0.08
  -2   3  -8    0.30    0.08
  -2   3  -8    0.35    0.09
   3  -3   8    0.84    0.10
   3  -3   8    0.72    0.09
  -3   3  -8    0.80    0.10
  -3   3  -8    0.76    0.11
   4  -3   8    0.93    0.10
   4  -3   8    0.96    0.08
  -4   3  -8    1.17    0.09
  -4   3  -8    0.82    0.11
  -6  -3   7   -0.06    0.05
  -6  -3   7   -0.02    0.07
   6   3  -7   -0.02    0.07
   6   3  -7   -0.01    0.04
   6   3  -7    0.06    0.04
   6   3  -7    0.00    0.07
   6   3  -7   -0.01    0.05
   6   3  -7    0.07    0.05
  -5  -3   7    0.86    0.16
  -5  -3   7    0.67    0.12
  -5  -3   7    0.69    0.18
   5   3  -7    0.63    0.10
   5   3  -7    0.70    0.13
   5   3  -7    0.63    0.11
   5   3  -7    0.65    0.10
   5   3  -7    0.68    0.10
   5   3  -7    0.63    0.10
   5   3  -7    0.70    0.11
   5   3  -7    0.80    0.13
  -4  -3   7    3.71    0.30
  -4  -3   7    3.81    0.26
  -4  -3   7    3.48    0.26
  -4  -3   7    3.71    0.29
  -4  -3   7    3.70    0.26
  -4  -3   7    3.90    0.28
  -4  -3   7    4.04    0.27
  -4  -3   7    3.38    0.29
  -4  -3   7    3.25    0.24
   4   3  -7    3.51    0.24
   4   3  -7    3.59    0.23
   4   3  -7    3.86    0.26
   4   3  -7    3.69    0.28
   4   3  -7    3.38    0.24
   4   3  -7    3.68    0.25
   4   3  -7    3.55    0.24
   4   3  -7    3.31    0.23
   4   3  -7    3.63    0.23
   4   3  -7    4.03    0.27
   4   3  -7    3.56    0.25
   4   3  -7    3.34    0.23
  -3  -3   7    2.94    0.21
  -3  -3   7    2.36    0.22
  -3  -3   7    2.73    0.20
  -3  -3   7    2.63    0.20
  -3  -3   7    2.46    0.21
  -3  -3   7    2.51    0.20
  -3  -3   7    2.60    0.23
  -3  -3   7    2.54    0.23
   3   3  -7    2.53    0.20
   3   3  -7    2.54    0.19
   3   3  -7    2.78    0.19
   3   3  -7    2.81    0.21
   3   3  -7    2.64    0.19
   3   3  -7    2.31    0.20
   3   3  -7    2.69    0.20
  -2  -3   7    0.57    0.10
  -2  -3   7    0.63    0.15
  -2  -3   7    0.68    0.11
  -2  -3   7    0.61    0.14
  -2  -3   7    0.56    0.11
  -2  -3   7    0.56    0.11
  -2  -3   7    0.53    0.12
   2   3  -7    0.61    0.10
   2   3  -7    0.58    0.10
   2   3  -7    0.71    0.10
   2   3  -7    0.70    0.11
   2   3  -7    0.46    0.09
  -1  -3   7    1.61    0.18
  -1  -3   7    1.58    0.21
  -1  -3   7    1.55    0.19
   1   3  -7    1.76    0.14
   1   3  -7    1.97    0.16
   0  -3   7    3.70    0.30
   0  -3   7    3.43    0.27
   0  -3   7    3.63    0.27
   0   3  -7    3.67    0.22
   0   3  -7    3.68    0.23
   1  -3   7    0.57    0.11
   1  -3   7    0.53    0.14
  -1   3  -7    0.40    0.09
  -1   3  -7    0.53    0.10
   2  -3   7   21.12    1.05
  -2   3  -7   20.85    0.92
  -2   3  -7   20.37    0.92
   3  -3   7    0.20    0.08
   3  -3   7    0.28    0.08
   3  -3   7    0.33    0.08
  -3   3  -7    0.12    0.08
  -3   3  -7    0.33    0.09
  -3   3  -7    0.29    0.08
   4  -3   7    2.91    0.19
   4  -3   7    3.42    0.18
  -4   3  -7    2.88    0.24
  -4   3  -7    2.95    0.21
  -4   3  -7    2.89    0.18
  -6  -3   6    0.00    0.15
  -6  -3   6   -0.05    0.07
   6   3  -6    0.06    0.05
   6   3  -6    0.01    0.05
   6   3  -6   -0.01    0.07
   6   3  -6   -0.01    0.08
   6   3  -6    0.08    0.05
   6   3  -6   -0.04    0.06
   6   3  -6   -0.01    0.06
   6   3  -6   -0.05    0.05
  -5  -3   6    1.23    0.18
  -5  -3   6    0.87    0.22
  -5  -3   6    1.56    0.19
  -5  -3   6    1.23    0.15
  -5  -3   6    1.16    0.14
   5   3  -6    1.18    0.12
   5   3  -6    1.01    0.13
   5   3  -6    1.33    0.18
   5   3  -6    1.18    0.14
   5   3  -6    1.44    0.16
   5   3  -6    1.20    0.12
   5   3  -6    1.06    0.12
   5   3  -6    1.16    0.17
   5   3  -6    0.94    0.14
  -4  -3   6    1.53    0.17
  -4  -3   6    1.52    0.19
  -4  -3   6    1.40    0.14
  -4  -3   6    1.68    0.17
  -4  -3   6    1.68    0.20
  -4  -3   6    1.38    0.18
  -4  -3   6    1.56    0.21
  -4  -3   6    1.43    0.16
  -4  -3   6    1.30    0.17
   4   3  -6    1.34    0.15
   4   3  -6    1.59    0.16
   4   3  -6    1.56    0.16
   4   3  -6    1.60    0.17
   4   3  -6    1.40    0.16
   4   3  -6    1.48    0.17
   4   3  -6    1.25    0.16
  -3  -3   6   23.67    1.00
  -3  -3   6   22.55    1.00
  -3  -3   6   24.19    1.05
  -3  -3   6   21.82    0.99
  -3  -3   6   23.06    1.00
  -3  -3   6   24.33    1.04
  -3  -3   6   23.82    1.01
   3   3  -6   22.12    1.01
   3   3  -6   23.40    0.99
   3   3  -6   22.37    0.99
   3   3  -6   20.29    1.02
   3   3  -6   22.81    0.99
   3   3  -6   22.91    1.01
   3   3  -6   23.71    1.00
   3   3  -6   22.54    0.99
  -2  -3   6    0.00    0.06
  -2  -3   6    0.09    0.06
  -2  -3   6    0.04    0.08
  -2  -3   6    0.09    0.05
  -2  -3   6    0.09    0.06
  -2  -3   6    0.00    0.05
  -2  -3   6    0.06    0.05
  -2  -3   6    0.13    0.08
   2   3  -6    0.03    0.05
   2   3  -6    0.02    0.05
   2   3  -6    0.04    0.05
   2   3  -6    0.04    0.05
   2   3  -6   -0.01    0.06
   2   3  -6    0.00    0.05
  -1  -3   6    8.94    0.57
  -1  -3   6   10.07    0.48
  -1  -3   6   10.79    0.50
  -1  -3   6    9.98    0.54
  -1  -3   6   10.75    0.52
  -1  -3   6   11.89    0.56
   1   3  -6   11.69    0.50
   1   3  -6   10.33    0.48
   1   3  -6   10.28    0.47
   1   3  -6   10.42    0.50
   1   3  -6   10.87    0.49
   0  -3   6    1.83    0.17
   0  -3   6    1.70    0.17
   0  -3   6    1.68    0.19
   0   3  -6    1.68    0.13
   0   3  -6    1.66    0.14
   1  -3   6    8.57    0.47
   1  -3   6    9.18    0.53
  -1   3  -6    9.07    0.44
  -1   3  -6    8.94    0.43
   2  -3   6    1.37    0.21
   2  -3   6    0.63    0.22
   2  -3   6    0.71    0.12
  -2   3  -6    1.71    0.16
  -2   3  -6    0.92    0.14
  -2   3  -6    1.44    0.13
   3  -3   6   25.10    1.11
   3  -3   6   25.33    1.12
   3  -3   6   26.69    1.15
   3  -3   6   25.85    1.10
  -3   3  -6   25.94    1.13
  -3   3  -6   25.51    1.13
  -3   3  -6   25.89    1.12
  -3   3  -6   26.24    1.13
  -3   3  -6   26.61    1.15
   4  -3   6    0.26    0.07
   4  -3   6    0.27    0.08
   4  -3   6    0.36    0.07
  -4   3  -6    0.37    0.11
  -4   3  -6    0.40    0.08
  -4   3  -6    0.44    0.10
   5  -3   6    1.45    0.12
   5  -3   6    1.71    0.10
   5  -3   6    2.00    0.15
  -5   3  -6    1.46    0.17
  -5   3  -6    1.49    0.11
  -6  -3   5    0.09    0.14
  -6  -3   5    0.03    0.07
  -6  -3   5    0.07    0.06
   6   3  -5    0.00    0.06
   6   3  -5    0.06    0.07
   6   3  -5    0.11    0.06
   6   3  -5    0.09    0.07
   6   3  -5    0.07    0.05
   6   3  -5    0.02    0.07
   6   3  -5    0.14    0.06
   6   3  -5    0.01    0.06
  -5  -3   5    2.84    0.28
  -5  -3   5    3.38    0.24
  -5  -3   5    3.57    0.25
  -5  -3   5    3.00    0.24
  -5  -3   5    3.45    0.26
  -5  -3   5    3.29    0.30
  -5  -3   5    3.41    0.23
   5   3  -5    3.04    0.23
   5   3  -5    2.85    0.20
   5   3  -5    3.03    0.22
   5   3  -5    3.10    0.25
   5   3  -5    3.35    0.25
   5   3  -5    3.04    0.22
   5   3  -5    3.17    0.21
   5   3  -5    3.39    0.24
   5   3  -5    3.44    0.24
   5   3  -5    2.85    0.21
   5   3  -5    3.09    0.20
   5   3  -5    3.38    0.23
  -4  -3   5    0.40    0.10
  -4  -3   5    0.47    0.11
  -4  -3   5    0.54    0.14
  -4  -3   5    0.46    0.09
  -4  -3   5    0.50    0.11
  -4  -3   5    0.55    0.10
  -4  -3   5    0.61    0.14
  -4  -3   5    0.34    0.10
  -4  -3   5    0.42    0.09
   4   3  -5    0.43    0.09
   4   3  -5    0.44    0.10
   4   3  -5    0.48    0.10
   4   3  -5    0.42    0.10
   4   3  -5    0.35    0.09
   4   3  -5    0.56    0.10
   4   3  -5    0.58    0.11
  -3  -3   5   10.96    0.51
  -3  -3   5   10.93    0.52
  -3  -3   5   10.47    0.49
  -3  -3   5   10.30    0.50
  -3  -3   5   11.21    0.54
  -3  -3   5   11.12    0.54
  -3  -3   5   10.84    0.50
  -3  -3   5   10.63    0.51
   3   3  -5   10.21    0.49
   3   3  -5   11.26    0.50
   3   3  -5   10.45    0.53
   3   3  -5   10.20    0.51
   3   3  -5   10.36    0.50
   3   3  -5   10.35    0.50
   3   3  -5   10.50    0.50
   3   3  -5   11.24    0.52
  -2  -3   5    0.46    0.10
  -2  -3   5    0.48    0.11
  -2  -3   5    0.51    0.10
  -2  -3   5    0.56    0.09
  -2  -3   5    0.38    0.07
  -2  -3   5    0.60    0.09
   2   3  -5    0.62    0.08
   2   3  -5    0.66    0.09
   2   3  -5    0.47    0.09
   2   3  -5    0.53    0.07
   2   3  -5    0.45    0.07
   2   3  -5    0.45    0.08
   2   3  -5    0.73    0.09
  -1  -3   5   23.70    1.02
  -1  -3   5   24.71    1.04
  -1  -3   5   24.85    1.03
  -1  -3   5   22.19    0.98
  -1  -3   5   21.99    1.02
  -1  -3   5   22.46    1.00
   1   3  -5   23.22    0.99
   1   3  -5   23.17    0.98
   1   3  -5   23.81    0.99
   1   3  -5   24.00    1.00
   1   3  -5   23.72    0.99
   1   3  -5   24.30    0.99
   1   3  -5   22.27    0.97
   0  -3   5    1.03    0.13
   0  -3   5    1.05    0.12
   0  -3   5    0.98    0.13
   0   3  -5    1.27    0.12
   0   3  -5    1.22    0.10
   0   3  -5    1.14    0.10
   0   3  -5    1.04    0.09
   1  -3   5   11.47    0.57
   1  -3   5   12.51    0.74
   1  -3   5   11.91    0.57
   1  -3   5   12.54    0.63
  -1   3  -5   11.42    0.54
  -1   3  -5   11.48    0.53
   2  -3   5    2.24    0.21
   2  -3   5    2.17    0.32
   2  -3   5    2.91    0.27
  -2   3  -5    2.76    0.19
  -2   3  -5    2.62    0.18
   3  -3   5   43.70    1.88
  -3   3  -5   47.59    1.89
  -3   3  -5   43.42    1.87
  -3   3  -5   45.42    1.88
   4  -3   5    1.55    0.19
   4  -3   5    1.68    0.15
   4  -3   5    1.40    0.16
   4  -3   5    1.50    0.15
  -4   3  -5    1.85    0.17
  -4   3  -5    1.46    0.18
  -4   3  -5    1.37    0.16
  -4   3  -5    1.86    0.18
   5  -3   5    0.68    0.08
   5  -3   5    0.58    0.09
   5  -3   5    0.62    0.10
  -5   3  -5    0.77    0.10
  -5   3  -5    0.62    0.09
  -5   3  -5    0.73    0.12
  -6  -3   4    0.83    0.11
  -6  -3   4    0.65    0.24
  -6  -3   4    0.66    0.15
  -6  -3   4    0.82    0.11
   6   3  -4    0.69    0.11
   6   3  -4    0.60    0.10
   6   3  -4    0.59    0.09
   6   3  -4    0.52    0.13
   6   3  -4    0.90    0.12
   6   3  -4    0.66    0.09
   6   3  -4    0.71    0.10
   6   3  -4    0.57    0.11
  -5  -3   4    0.24    0.10
  -5  -3   4    0.32    0.14
  -5  -3   4    0.28    0.10
  -5  -3   4    0.21    0.09
  -5  -3   4    0.33    0.13
  -5  -3   4    0.24    0.10
  -5  -3   4    0.15    0.08
  -5  -3   4    0.16    0.11
   5   3  -4    0.21    0.08
   5   3  -4    0.17    0.08
   5   3  -4    0.16    0.08
   5   3  -4    0.24    0.07
   5   3  -4    0.20    0.09
   5   3  -4    0.12    0.09
   5   3  -4    0.12    0.09
   5   3  -4    0.17    0.08
   5   3  -4    0.28    0.08
   5   3  -4    0.20    0.08
   5   3  -4    0.21    0.09
  -4  -3   4    0.07    0.06
  -4  -3   4    0.11    0.05
  -4  -3   4    0.05    0.07
  -4  -3   4   -0.01    0.05
  -4  -3   4    0.08    0.06
  -4  -3   4    0.04    0.07
  -4  -3   4    0.12    0.07
  -4  -3   4    0.08    0.08
  -4  -3   4    0.08    0.08
   4   3  -4   -0.03    0.06
   4   3  -4    0.05    0.05
   4   3  -4    0.08    0.07
   4   3  -4    0.08    0.07
   4   3  -4    0.05    0.06
   4   3  -4   -0.03    0.07
   4   3  -4    0.02    0.06
  -3  -3   4    1.05    0.11
  -3  -3   4    0.90    0.11
  -3  -3   4    0.92    0.11
  -3  -3   4    1.07    0.15
  -3  -3   4    1.02    0.13
  -3  -3   4    0.95    0.10
  -3  -3   4    1.07    0.15
  -3  -3   4    1.30    0.13
   3   3  -4    1.06    0.13
   3   3  -4    1.03    0.10
   3   3  -4    0.96    0.11
   3   3  -4    1.26    0.12
   3   3  -4    1.23    0.13
   3   3  -4    1.13    0.13
   3   3  -4    1.22    0.13
  -2  -3   4   32.75    1.35
  -2  -3   4   31.22    1.30
  -2  -3   4   30.68    1.32
  -2  -3   4   31.65    1.33
   2   3  -4   31.71    1.30
   2   3  -4   32.28    1.32
   2   3  -4   30.51    1.30
   2   3  -4   30.56    1.30
   2   3  -4   33.21    1.33
   2   3  -4   30.35    1.31
   2   3  -4   32.40    1.30
  -1  -3   4    2.68    0.18
  -1  -3   4    2.38    0.18
   1   3  -4    2.60    0.15
   1   3  -4    2.55    0.19
   1   3  -4    2.40    0.15
   0  -3   4    0.99    0.10
   0  -3   4    1.04    0.12
   0   3  -4    1.01    0.11
   0   3  -4    0.94    0.09
   0   3  -4    0.89    0.08
   1  -3   4   46.76    2.06
   1  -3   4   51.11    2.12
   1  -3   4   52.18    2.25
   1  -3   4   50.57    2.08
  -1   3  -4   53.03    2.06
  -1   3  -4   48.87    2.11
  -1   3  -4   49.62    2.05
  -1   3  -4   52.69    2.14
  -1   3  -4   47.68    2.04
  -1   3  -4   50.72    2.05
   2  -3   4    0.56    0.14
   2  -3   4    0.46    0.17
   2  -3   4    0.62    0.12
  -2   3  -4    0.84    0.11
  -2   3  -4    0.56    0.08
   3  -3   4   43.64    2.41
   3  -3   4   49.65    2.06
  -3   3  -4   52.75    2.07
  -3   3  -4   49.85    2.05
  -3   3  -4   52.08    2.06
   4  -3   4    1.21    0.14
   4  -3   4    1.64    0.17
   4  -3   4    1.50    0.19
   4  -3   4    1.27    0.14
   4  -3   4    1.42    0.14
  -4   3  -4    1.42    0.14
  -4   3  -4    1.60    0.17
  -4   3  -4    1.41    0.17
  -4   3  -4    1.58    0.17
  -4   3  -4    1.44    0.16
   5  -3   4   19.43    0.87
   5  -3   4   19.18    0.80
   5  -3   4   19.39    0.84
   5  -3   4   17.94    0.80
  -5   3  -4   18.63    0.82
  -5   3  -4   19.31    0.87
  -5   3  -4   17.96    0.81
  -5   3  -4   18.00    0.84
  -6  -3   3    1.53    0.24
  -6  -3   3    1.60    0.15
  -6  -3   3    1.63    0.20
  -6  -3   3    1.92    0.15
   6   3  -3    1.62    0.15
   6   3  -3    1.57    0.15
   6   3  -3    1.58    0.17
   6   3  -3    1.96    0.17
   6   3  -3    1.58    0.14
   6   3  -3    1.88    0.16
   6   3  -3    1.71    0.15
   6   3  -3    1.75    0.17
  -5  -3   3    0.06    0.08
  -5  -3   3    0.16    0.09
  -5  -3   3    0.06    0.12
  -5  -3   3   -0.09    0.06
  -5  -3   3    0.11    0.08
  -5  -3   3    0.09    0.08
  -5  -3   3    0.14    0.08
  -5  -3   3    0.03    0.09
   5   3  -3    0.01    0.07
   5   3  -3   -0.04    0.08
   5   3  -3   -0.03    0.06
   5   3  -3   -0.02    0.08
   5   3  -3    0.14    0.08
   5   3  -3    0.04    0.06
   5   3  -3    0.07    0.07
   5   3  -3    0.01    0.07
   5   3  -3   -0.01    0.07
   5   3  -3    0.10    0.06
   5   3  -3    0.04    0.08
  -4  -3   3    0.97    0.14
  -4  -3   3    0.97    0.12
  -4  -3   3    0.91    0.12
  -4  -3   3    0.83    0.16
  -4  -3   3    0.88    0.12
  -4  -3   3    0.95    0.17
  -4  -3   3    1.03    0.15
   4   3  -3    0.94    0.12
   4   3  -3    0.92    0.11
   4   3  -3    0.74    0.11
   4   3  -3    0.81    0.13
   4   3  -3    0.87    0.17
  -3  -3   3    0.28    0.06
  -3  -3   3    0.25    0.06
  -3  -3   3    0.51    0.12
  -3  -3   3    0.67    0.09
  -3  -3   3    0.30    0.07
  -3  -3   3    0.24    0.09
   3   3  -3    0.22    0.07
   3   3  -3    0.41    0.07
   3   3  -3    0.74    0.10
   3   3  -3    0.30    0.06
   3   3  -3    0.29    0.07
   3   3  -3    0.36    0.07
  -2  -3   3    0.20    0.08
  -2  -3   3    0.18    0.07
  -2  -3   3    0.13    0.04
   2   3  -3    0.13    0.04
   2   3  -3    0.14    0.04
   2   3  -3    0.18    0.06
   2   3  -3    0.27    0.06
   2   3  -3    0.12    0.07
   2   3  -3    0.13    0.06
  -1  -3   3   72.64    2.87
   1   3  -3   65.85    2.83
   1   3  -3   72.11    2.89
   1   3  -3   72.74    2.85
   0  -3   3   50.78    2.06
   0  -3   3   49.67    2.08
   0   3  -3   51.89    2.11
   0   3  -3   51.91    2.07
   1  -3   3   54.53    2.26
   1  -3   3   53.39    2.12
   1  -3   3   49.27    2.09
  -1   3  -3   52.48    2.10
  -1   3  -3   49.16    2.08
  -1   3  -3   50.60    2.15
   2  -3   3    2.24    0.28
   2  -3   3    2.41    0.15
   2  -3   3    2.43    0.22
   2  -3   3    2.91    0.24
   2  -3   3    2.25    0.18
   2  -3   3    2.10    0.15
  -2   3  -3    2.29    0.17
  -2   3  -3    1.93    0.17
  -2   3  -3    2.29    0.15
  -2   3  -3    2.52    0.17
  -2   3  -3    2.05    0.14
   3  -3   3    2.91    0.38
   3  -3   3    3.50    0.23
   3  -3   3    2.95    0.25
   3  -3   3    3.17    0.32
   3  -3   3    3.00    0.21
  -3   3  -3    2.85    0.18
  -3   3  -3    3.21    0.27
  -3   3  -3    3.27    0.32
  -3   3  -3    2.74    0.18
  -3   3  -3    3.08    0.21
  -3   3  -3    3.12    0.20
   4  -3   3    7.50    0.38
   4  -3   3    6.31    0.54
   4  -3   3    5.83    0.63
  -4   3  -3    7.83    0.40
  -4   3  -3    6.84    0.38
  -4   3  -3    7.41    0.39
  -4   3  -3    6.88    0.37
   5  -3   3    7.18    0.36
   5  -3   3    7.72    0.43
   5  -3   3    7.69    0.39
   5  -3   3    7.42    0.37
   5  -3   3    7.62    0.39
  -5   3  -3    7.67    0.36
  -5   3  -3    7.04    0.39
  -5   3  -3    7.84    0.43
  -5   3  -3    7.27    0.38
   6  -3   3    0.18    0.08
   6  -3   3    0.07    0.07
   6  -3   3    0.13    0.04
   6  -3   3    0.12    0.04
  -6   3  -3    0.11    0.05
  -6   3  -3    0.10    0.09
  -6  -3   2    4.82    0.27
  -6  -3   2    5.06    0.26
   6   3  -2    4.93    0.26
   6   3  -2    5.20    0.28
   6   3  -2    4.80    0.27
   6   3  -2    4.75    0.27
   6   3  -2    5.04    0.29
   6   3  -2    4.91    0.27
   6   3  -2    4.78    0.30
  -5  -3   2    0.78    0.12
  -5  -3   2    0.94    0.14
  -5  -3   2    0.74    0.12
  -5  -3   2    0.74    0.13
  -5  -3   2    0.80    0.14
  -5  -3   2    0.81    0.13
   5   3  -2    0.78    0.12
   5   3  -2    0.69    0.12
   5   3  -2    0.62    0.11
   5   3  -2    0.73    0.11
   5   3  -2    0.84    0.11
   5   3  -2    0.74    0.13
   5   3  -2    0.70    0.12
   5   3  -2    0.85    0.12
   5   3  -2    0.82    0.23
   5   3  -2    0.82    0.14
   5   3  -2    0.76    0.13
  -4  -3   2   25.03    1.09
  -4  -3   2   25.16    1.12
  -4  -3   2   24.22    1.04
  -4  -3   2   24.39    1.05
  -4  -3   2   24.33    1.03
  -4  -3   2   23.89    1.05
  -4  -3   2   24.74    1.10
   4   3  -2   25.05    1.05
   4   3  -2   23.52    1.04
   4   3  -2   23.40    1.09
   4   3  -2   22.69    1.20
   4   3  -2   23.91    1.04
   4   3  -2   24.02    1.07
  -3  -3   2    0.13    0.10
  -3  -3   2    0.11    0.05
  -3  -3   2    0.03    0.04
  -3  -3   2    0.05    0.08
  -3  -3   2    0.27    0.07
  -3  -3   2    0.06    0.04
   3   3  -2    0.07    0.11
   3   3  -2    0.06    0.05
   3   3  -2    0.13    0.06
   3   3  -2    0.31    0.09
   3   3  -2    0.21    0.06
   3   3  -2    0.05    0.04
   3   3  -2    0.09    0.04
  -2  -3   2   34.93    1.44
  -2  -3   2   34.63    1.43
  -2  -3   2   33.78    1.43
   2   3  -2   34.71    1.43
   2   3  -2   34.72    1.42
   2   3  -2   35.20    1.48
  -1  -3   2    7.48    0.35
   1   3  -2    7.67    0.34
   1   3  -2    7.87    0.37
   0  -3   2    0.10    0.02
   0   3  -2    0.04    0.03
   0   3  -2    0.06    0.04
   1  -3   2  116.05    4.92
   1  -3   2  127.82    5.07
   1  -3   2  122.88    4.95
  -1   3  -2  128.44    4.99
  -1   3  -2  122.76    4.94
   2  -3   2   30.20    1.26
   2  -3   2   30.82    1.44
   2  -3   2   27.95    1.22
   2  -3   2   30.03    1.24
   2  -3   2   28.17    1.22
   2  -3   2   34.05    1.34
  -2   3  -2   29.73    1.24
  -2   3  -2   29.89    1.24
  -2   3  -2   28.01    1.21
  -2   3  -2   27.08    1.22
  -2   3  -2   29.50    1.22
  -2   3  -2   29.00    1.30
  -2   3  -2   28.18    1.23
   3  -3   2    2.92    0.20
   3  -3   2    2.96    0.22
   3  -3   2    2.85    0.19
   3  -3   2    2.73    0.23
   3  -3   2    2.87    0.18
   3  -3   2    2.72    0.35
   3  -3   2    2.85    0.29
  -3   3  -2    3.11    0.21
  -3   3  -2    2.93    0.23
  -3   3  -2    2.83    0.17
  -3   3  -2    3.26    0.23
  -3   3  -2    2.73    0.20
  -3   3  -2    2.83    0.17
  -3   3  -2    2.96    0.19
  -3   3  -2    2.98    0.22
   4  -3   2    1.40    0.15
   4  -3   2    1.17    0.14
   4  -3   2    1.56    0.18
   4  -3   2    1.31    0.34
   4  -3   2    1.10    0.16
   4  -3   2    1.43    0.27
  -4   3  -2    1.24    0.14
  -4   3  -2    1.31    0.12
  -4   3  -2    1.16    0.18
  -4   3  -2    1.19    0.13
  -4   3  -2    1.00    0.14
  -4   3  -2    1.62    0.18
  -4   3  -2    1.23    0.14
   5  -3   2   11.55    0.54
   5  -3   2   11.91    0.54
   5  -3   2   10.62    0.50
   5  -3   2   10.97    0.53
   5  -3   2   11.31    0.52
   5  -3   2   11.45    0.58
  -5   3  -2   11.37    0.55
  -5   3  -2   11.62    0.58
  -5   3  -2   11.36    0.54
  -5   3  -2   11.26    0.52
   6  -3   2    0.81    0.08
   6  -3   2    0.98    0.11
   6  -3   2    0.75    0.09
   6  -3   2    0.80    0.12
  -6   3  -2    1.04    0.10
  -6   3  -2    0.80    0.10
  -6   3  -2    0.97    0.11
  -6  -3   1    1.01    0.11
  -6  -3   1    1.04    0.12
   6   3  -1    1.04    0.12
   6   3  -1    0.92    0.12
   6   3  -1    1.42    0.14
   6   3  -1    0.98    0.11
   6   3  -1    1.08    0.12
  -5  -3   1    1.39    0.15
  -5  -3   1    1.19    0.16
  -5  -3   1    1.10    0.14
  -5  -3   1    1.21    0.14
   5   3  -1    1.22    0.14
   5   3  -1    1.21    0.15
   5   3  -1    1.23    0.16
   5   3  -1    1.28    0.14
   5   3  -1    1.23    0.13
   5   3  -1    1.17    0.14
   5   3  -1    1.26    0.16
   5   3  -1    1.06    0.25
  -4  -3   1   11.45    0.55
  -4  -3   1   10.65    0.51
  -4  -3   1   10.53    0.48
  -4  -3   1    9.89    0.50
  -4  -3   1   10.31    0.50
  -4  -3   1   10.74    0.56
   4   3  -1    9.84    0.49
   4   3  -1   10.27    0.55
   4   3  -1   10.52    0.53
   4   3  -1   10.31    0.50
   4   3  -1   10.66    0.66
  -3  -3   1    3.45    0.20
  -3  -3   1    3.56    0.25
  -3  -3   1    3.64    0.20
  -3  -3   1    3.75    0.27
  -3  -3   1    3.40    0.22
   3   3  -1    3.55    0.20
   3   3  -1    3.36    0.19
   3   3  -1    3.35    0.20
   3   3  -1    3.33    0.22
   3   3  -1    3.82    0.31
  -2  -3   1   23.34    1.04
  -2  -3   1   24.92    1.04
   2   3  -1   26.24    1.04
   2   3  -1   25.06    1.08
   2   3  -1   25.51    1.04
   2   3  -1   23.94    1.04
   2   3  -1   26.13    1.18
  -1  -3   1    6.13    0.28
   1   3  -1    5.94    0.27
   1   3  -1    6.33    0.30
   1   3  -1    6.41    0.28
   0  -3   1    3.19    0.16
   0  -3   1    3.17    0.15
   0   3  -1    3.27    0.17
   0   3  -1    3.04    0.15
   1  -3   1   38.97    1.56
   1  -3   1   37.67    1.55
   1  -3   1   41.44    1.67
   1  -3   1   33.58    1.53
  -1   3  -1   38.71    1.56
  -1   3  -1   38.90    1.59
   2  -3   1   81.20    3.31
   2  -3   1   80.54    3.29
   2  -3   1   86.30    3.47
  -2   3  -1   82.33    3.36
  -2   3  -1   81.15    3.28
  -2   3  -1   77.73    3.27
  -2   3  -1   80.59    3.29
   3  -3   1    2.97    0.34
   3  -3   1    3.01    0.28
   3  -3   1    3.55    0.20
   3  -3   1    2.96    0.22
   3  -3   1    2.95    0.19
   3  -3   1    2.72    0.19
   3  -3   1    2.80    0.21
  -3   3  -1    2.98    0.20
  -3   3  -1    2.88    0.18
  -3   3  -1    3.08    0.22
  -3   3  -1    2.92    0.17
  -3   3  -1    2.81    0.20
  -3   3  -1    3.10    0.21
  -3   3  -1    3.01    0.21
   4  -3   1    1.90    0.16
   4  -3   1    1.97    0.19
   4  -3   1    1.45    0.15
   4  -3   1    1.88    0.27
   4  -3   1    1.71    0.31
   4  -3   1    2.03    0.18
  -4   3  -1    2.05    0.18
  -4   3  -1    1.55    0.16
  -4   3  -1    2.09    0.17
  -4   3  -1    1.97    0.15
  -4   3  -1    1.80    0.19
  -4   3  -1    1.84    0.17
  -4   3  -1    1.90    0.14
  -4   3  -1    1.82    0.19
  -4   3  -1    1.94    0.20
   5  -3   1    0.05    0.08
   5  -3   1    0.14    0.06
   5  -3   1    0.09    0.06
   5  -3   1    0.05    0.07
   5  -3   1    0.11    0.07
   5  -3   1    0.16    0.08
   5  -3   1    0.17    0.09
   5  -3   1    0.15    0.08
   5  -3   1    0.10    0.07
   5  -3   1    0.03    0.09
   5  -3   1    0.09    0.07
   5  -3   1    0.06    0.12
  -5   3  -1    0.12    0.08
  -5   3  -1    0.10    0.08
  -5   3  -1    0.13    0.08
  -5   3  -1    0.10    0.10
  -5   3  -1    0.08    0.09
  -5   3  -1    0.11    0.12
  -5   3  -1    0.14    0.08
   6  -3   1    4.16    0.22
   6  -3   1    3.84    0.25
   6  -3   1    4.27    0.23
   6  -3   1    4.21    0.21
   6  -3   1    4.12    0.20
   6  -3   1    4.14    0.23
  -6   3  -1    4.10    0.22
  -6   3  -1    3.39    0.27
  -6   3  -1    3.65    0.25
  -6  -3   0    4.64    0.26
  -6  -3   0    4.89    0.27
   6   3   0    4.93    0.26
   6   3   0    4.88    0.26
   6   3   0    4.74    0.27
   6   3   0    4.29    0.27
   6   3   0    4.75    0.29
  -5  -3   0    5.52    0.32
  -5  -3   0    5.43    0.33
  -5  -3   0    5.40    0.31
  -5  -3   0    5.49    0.30
  -5  -3   0    5.59    0.36
   5   3   0    5.71    0.32
   5   3   0    4.85    0.45
   5   3   0    5.40    0.30
   5   3   0    5.42    0.31
   5   3   0    5.30    0.32
   5   3   0    5.42    0.35
   5   3   0    4.99    0.30
  -4  -3   0    0.15    0.06
  -4  -3   0    0.24    0.08
  -4  -3   0    0.28    0.08
  -4  -3   0    0.31    0.09
   4   3   0    0.04    0.10
   4   3   0    0.16    0.06
  -3  -3   0    2.32    0.17
  -3  -3   0    2.48    0.23
  -3  -3   0    2.17    0.17
  -3  -3   0    2.31    0.16
  -3  -3   0    2.14    0.15
  -3  -3   0    2.39    0.24
   3   3   0    2.43    0.18
   3   3   0    2.48    0.18
   3   3   0    2.01    0.15
   3   3   0    2.56    0.26
   3   3   0    2.42    0.16
   3   3   0    2.57    0.30
  -2  -3   0    9.13    0.43
   2   3   0   10.53    0.55
   2   3   0    9.12    0.42
   2   3   0    9.01    0.46
   2   3   0    9.94    0.44
   0  -3   0    0.00    0.01
   0  -3   0    0.00    0.02
   0  -3   0    0.08    0.03
   0   3   0    0.03    0.01
   0   3   0    0.02    0.02
   2  -3   0   10.20    0.45
   2  -3   0   10.36    0.57
   2  -3   0    9.58    0.45
   2  -3   0    9.97    0.50
  -2   3   0   10.12    0.50
  -2   3   0    8.71    0.43
  -2   3   0    9.06    0.42
   3  -3   0    3.01    0.28
   3  -3   0    2.24    0.17
   3  -3   0    2.72    0.19
   3  -3   0    2.33    0.16
   3  -3   0    2.72    0.31
   3  -3   0    2.30    0.18
   3  -3   0    2.24    0.17
  -3   3   0    2.50    0.18
  -3   3   0    2.10    0.16
  -3   3   0    2.29    0.15
  -3   3   0    2.26    0.16
  -3   3   0    2.20    0.13
   4  -3   0    0.09    0.10
   4  -3   0    0.50    0.10
   4  -3   0    0.19    0.07
   4  -3   0    0.18    0.07
   4  -3   0    0.05    0.07
   4  -3   0    0.10    0.14
  -4   3   0    0.07    0.08
  -4   3   0    0.36    0.11
  -4   3   0    0.12    0.08
  -4   3   0    0.14    0.05
  -4   3   0    0.35    0.09
  -4   3   0    0.19    0.06
  -4   3   0    0.12    0.10
   5  -3   0    5.72    0.31
   5  -3   0    5.07    0.28
   5  -3   0    4.63    0.29
   5  -3   0    5.69    0.35
   5  -3   0    5.25    0.30
   5  -3   0    5.17    0.27
   5  -3   0    5.45    0.31
   5  -3   0    5.15    0.28
   5  -3   0    5.59    0.34
   5  -3   0    5.26    0.29
   5  -3   0    5.55    0.33
   5  -3   0    4.32    0.44
  -5   3   0    5.42    0.29
  -5   3   0    4.58    0.35
  -5   3   0    5.11    0.35
  -5   3   0    5.44    0.32
  -5   3   0    5.54    0.32
  -5   3   0    5.53    0.33
  -5   3   0    5.68    0.32
   6  -3   0    4.71    0.25
   6  -3   0    4.54    0.26
   6  -3   0    4.67    0.23
   6  -3   0    4.45    0.24
   6  -3   0    4.43    0.28
   6  -3   0    4.70    0.24
   6  -3   0    4.77    0.26
  -6   3   0    4.68    0.29
  -6   3   0    4.96    0.26
  -6   3   0    4.43    0.28
  -6  -3  -1    3.59    0.24
  -6  -3  -1    4.11    0.24
   6   3   1    4.01    0.23
   6   3   1    4.11    0.23
   6   3   1    4.03    0.22
   6   3   1    4.03    0.26
  -5  -3  -1    0.08    0.08
  -5  -3  -1    0.18    0.06
  -5  -3  -1    0.05    0.09
  -5  -3  -1    0.03    0.07
   5   3   1    0.11    0.07
   5   3   1    0.20    0.10
   5   3   1    0.05    0.07
   5   3   1    0.10    0.06
   5   3   1    0.16    0.07
   5   3   1    0.05    0.11
  -4  -3  -1    1.55    0.15
  -4  -3  -1    1.77    0.16
  -4  -3  -1    2.36    0.20
  -4  -3  -1    1.87    0.17
   4   3   1    1.84    0.16
   4   3   1    1.82    0.26
  -3  -3  -1    2.94    0.19
  -3  -3  -1    2.71    0.18
  -3  -3  -1    3.11    0.20
   3   3   1    2.98    0.22
   3   3   1    3.20    0.28
   3   3   1    3.19    0.35
   3   3   1    2.70    0.18
  -2  -3  -1   77.41    3.25
  -2  -3  -1   80.34    3.28
   2   3   1   82.66    3.24
   2   3   1   82.68    3.27
   2   3   1   75.67    3.28
   2   3   1   85.58    3.42
  -1  -3  -1   35.51    1.47
   1   3   1   36.85    1.46
   1   3   1   37.76    1.48
   1   3   1   35.03    1.47
   0  -3  -1    3.22    0.16
   0  -3  -1    3.20    0.16
   0   3   1    3.25    0.16
   1  -3  -1    7.14    0.32
   1  -3  -1    6.68    0.31
   1  -3  -1    7.22    0.34
   1  -3  -1    7.04    0.31
  -1   3   1    7.26    0.34
   2  -3  -1   27.40    1.13
   2  -3  -1   27.22    1.18
   2  -3  -1   25.89    1.11
   2  -3  -1   28.38    1.24
   2  -3  -1   27.30    1.13
  -2   3   1   26.91    1.18
  -2   3   1   25.62    1.12
   3  -3  -1    3.73    0.35
   3  -3  -1    3.51    0.22
   3  -3  -1    3.86    0.32
   3  -3  -1    3.19    0.22
   3  -3  -1    3.85    0.22
   3  -3  -1    3.59    0.23
   3  -3  -1    3.33    0.22
   3  -3  -1    3.67    0.22
  -3   3   1    3.84    0.21
  -3   3   1    3.27    0.17
  -3   3   1    3.70    0.21
  -3   3   1    3.58    0.22
   4  -3  -1   10.97    0.58
   4  -3  -1   10.43    0.68
   4  -3  -1   10.99    0.55
   4  -3  -1   11.00    0.53
   4  -3  -1   10.48    0.51
   4  -3  -1   10.91    0.52
  -4   3   1   10.45    0.49
  -4   3   1   10.65    0.48
  -4   3   1   11.10    0.53
  -4   3   1   11.11    0.55
  -4   3   1   11.27    0.55
  -4   3   1   10.85    0.55
   5  -3  -1    1.04    0.12
   5  -3  -1    1.43    0.16
   5  -3  -1    1.15    0.14
   5  -3  -1    1.39    0.16
   5  -3  -1    1.20    0.13
   5  -3  -1    1.34    0.14
   5  -3  -1    1.02    0.24
   5  -3  -1    1.19    0.12
   5  -3  -1    1.23    0.15
   5  -3  -1    1.31    0.17
   5  -3  -1    1.31    0.19
   5  -3  -1    1.21    0.14
  -5   3   1    1.07    0.15
  -5   3   1    1.33    0.15
  -5   3   1    1.69    0.20
  -5   3   1    0.89    0.17
  -5   3   1    1.37    0.17
  -5   3   1    1.27    0.13
  -5   3   1    1.58    0.21
   6  -3  -1    0.84    0.15
   6  -3  -1    0.77    0.12
   6  -3  -1    1.01    0.10
   6  -3  -1    0.90    0.10
   6  -3  -1    0.90    0.11
   6  -3  -1    1.02    0.11
   6  -3  -1    1.00    0.10
   6  -3  -1    0.84    0.11
  -6   3   1    0.88    0.12
  -6   3   1    1.20    0.15
  -6   3   1    1.04    0.19
  -6  -3  -2    0.77    0.10
  -6  -3  -2    0.88    0.11
   6   3   2    0.72    0.09
   6   3   2    0.84    0.08
   6   3   2    0.93    0.14
   6   3   2    0.96    0.10
  -5  -3  -2   10.85    0.53
  -5  -3  -2   11.48    0.59
   5   3   2   10.98    0.55
   5   3   2   12.27    0.54
   5   3   2   10.63    0.52
   5   3   2   12.71    0.60
   5   3   2    9.33    0.75
   5   3   2   11.69    0.54
  -4  -3  -2    1.23    0.15
  -4  -3  -2    1.07    0.13
  -4  -3  -2    1.01    0.13
  -4  -3  -2    1.10    0.16
   4   3   2    1.29    0.26
   4   3   2    0.91    0.27
   4   3   2    1.07    0.13
  -3  -3  -2    2.86    0.20
  -3  -3  -2    2.96    0.19
  -3  -3  -2    3.20    0.21
   3   3   2    3.20    0.37
   3   3   2    2.93    0.23
   3   3   2    3.11    0.29
  -2  -3  -2   29.54    1.27
  -2  -3  -2   27.49    1.25
  -2  -3  -2   29.37    1.27
   2   3   2   32.93    1.47
   2   3   2   31.03    1.34
   2   3   2   31.67    1.30
  -1  -3  -2  122.10    4.81
  -1  -3  -2  115.49    4.81
   1   3   2  121.04    4.92
   1   3   2  123.18    4.82
   0  -3  -2    0.14    0.03
   0   3   2    0.05    0.02
   1  -3  -2    7.63    0.34
   1  -3  -2    7.75    0.33
   1  -3  -2    7.97    0.36
   1  -3  -2    7.66    0.34
  -1   3   2    7.72    0.36
  -1   3   2    6.93    0.33
   2  -3  -2   32.57    1.42
   2  -3  -2   35.84    1.48
   2  -3  -2   34.14    1.42
   2  -3  -2   34.27    1.43
   2  -3  -2   33.95    1.42
  -2   3   2   35.92    1.42
  -2   3   2   35.16    1.48
   3  -3  -2    0.17    0.09
   3  -3  -2    0.07    0.06
   3  -3  -2    0.05    0.06
   3  -3  -2    0.06    0.05
   3  -3  -2    0.10    0.12
   3  -3  -2    0.07    0.06
   3  -3  -2    0.20    0.06
  -3   3   2    0.11    0.05
  -3   3   2    0.15    0.05
  -3   3   2    0.14    0.05
  -3   3   2    0.12    0.05
  -3   3   2    0.08    0.04
   4  -3  -2   24.63    1.23
   4  -3  -2   23.62    1.11
   4  -3  -2   24.36    1.04
   4  -3  -2   24.90    1.09
   4  -3  -2   24.70    1.06
   4  -3  -2   24.17    1.06
  -4   3   2   23.64    1.02
  -4   3   2   23.86    1.07
  -4   3   2   24.68    1.09
  -4   3   2   25.52    1.09
  -4   3   2   23.29    1.01
   5  -3  -2    0.61    0.11
   5  -3  -2    0.56    0.13
   5  -3  -2    0.62    0.10
   5  -3  -2    0.76    0.10
   5  -3  -2    0.78    0.21
   5  -3  -2    0.69    0.11
   5  -3  -2    0.65    0.12
   5  -3  -2    0.50    0.11
   5  -3  -2    0.70    0.10
   5  -3  -2    0.79    0.12
   5  -3  -2    0.71    0.12
   5  -3  -2    0.64    0.10
   5  -3  -2    0.70    0.11
  -5   3   2    0.65    0.15
  -5   3   2    0.83    0.16
  -5   3   2    0.94    0.14
  -5   3   2    0.68    0.12
  -5   3   2    1.00    0.12
  -5   3   2    0.72    0.12
   6  -3  -2    5.32    0.27
   6  -3  -2    5.00    0.25
   6  -3  -2    4.66    0.28
   6  -3  -2    5.04    0.26
   6  -3  -2    4.68    0.26
   6  -3  -2    5.49    0.28
   6  -3  -2    4.45    0.28
   6  -3  -2    4.73    0.26
   6  -3  -2    4.75    0.31
  -6   3   2    4.96    0.31
  -6   3   2    4.64    0.27
  -6   3   2    5.03    0.29
  -6  -3  -3    0.10    0.05
   6   3   3    0.18    0.04
   6   3   3    0.12    0.07
  -5  -3  -3    7.48    0.39
  -5  -3  -3    7.28    0.38
  -5  -3  -3    7.71    0.43
   5   3   3    7.85    0.40
   5   3   3    7.14    0.37
   5   3   3    7.61    0.39
   5   3   3    7.95    0.43
   5   3   3    7.66    0.39
  -4  -3  -3    6.75    0.40
  -4  -3  -3    6.92    0.37
  -4  -3  -3    6.68    0.36
   4   3   3    7.18    0.54
   4   3   3    5.68    0.60
   4   3   3    7.40    0.36
  -3  -3  -3    3.04    0.21
  -3  -3  -3    3.28    0.21
  -3  -3  -3    3.30    0.23
   3   3   3    3.05    0.39
   3   3   3    3.02    0.25
   3   3   3    3.40    0.32
  -2  -3  -3    2.24    0.15
  -2  -3  -3    2.18    0.16
  -2  -3  -3    2.14    0.16
   2   3   3    2.63    0.22
  -1  -3  -3   48.32    1.98
  -1  -3  -3   49.24    1.98
   1   3   3   49.77    2.12
   1   3   3   48.20    2.00
   1   3   3   47.61    1.98
   0  -3  -3   46.80    1.91
   0  -3  -3   49.20    1.92
   0   3   3   45.13    1.91
   0   3   3   44.50    1.98
   0   3   3   50.15    1.92
   1  -3  -3   69.31    2.79
   1  -3  -3   69.21    2.80
   1  -3  -3   72.68    2.81
   1  -3  -3   72.29    2.82
  -1   3   3   72.22    2.81
  -1   3   3   62.24    2.79
   2  -3  -3    0.09    0.05
   2  -3  -3    0.14    0.06
   2  -3  -3    0.13    0.05
   2  -3  -3    0.15    0.04
  -2   3   3    0.16    0.04
   3  -3  -3    0.28    0.07
   3  -3  -3    0.29    0.08
   3  -3  -3    0.27    0.07
   3  -3  -3    0.25    0.07
   3  -3  -3    0.29    0.07
   3  -3  -3    0.26    0.08
  -3   3   3    0.27    0.07
   4  -3  -3    0.96    0.14
   4  -3  -3    0.91    0.14
   4  -3  -3    0.86    0.12
   4  -3  -3    0.79    0.12
   4  -3  -3    0.63    0.09
   4  -3  -3    0.91    0.13
  -4   3   3    1.02    0.15
  -4   3   3    0.92    0.13
  -4   3   3    0.80    0.08
  -4   3   3    0.77    0.08
  -4   3   3    0.75    0.13
  -4   3   3    0.75    0.13
   5  -3  -3   -0.01    0.06
   5  -3  -3   -0.01    0.07
   5  -3  -3    0.05    0.07
   5  -3  -3    0.03    0.06
   5  -3  -3    0.07    0.07
   5  -3  -3   -0.04    0.06
   5  -3  -3    0.07    0.07
   5  -3  -3    0.09    0.08
   5  -3  -3    0.18    0.07
   5  -3  -3   -0.02    0.07
   5  -3  -3    0.07    0.06
  -5   3   3    0.05    0.08
  -5   3   3   -0.03    0.08
  -5   3   3   -0.03    0.06
  -5   3   3    0.04    0.05
  -5   3   3    0.00    0.09
  -5   3   3    0.01    0.08
   6  -3  -3    1.84    0.14
   6  -3  -3    1.87    0.14
   6  -3  -3    1.62    0.18
   6  -3  -3    1.70    0.14
   6  -3  -3    1.95    0.16
   6  -3  -3    1.49    0.16
   6  -3  -3    1.87    0.17
   6  -3  -3    1.76    0.14
  -6   3   3    1.87    0.20
  -6   3   3    1.72    0.16
  -5  -3  -4   18.33    0.79
  -5  -3  -4   17.68    0.82
  -5  -3  -4   17.97    0.80
   5   3   4   17.19    0.79
   5   3   4   19.21    0.79
   5   3   4   17.64    0.83
   5   3   4   17.36    0.77
  -4  -3  -4    1.49    0.16
  -4  -3  -4    1.54    0.19
  -4  -3  -4    1.63    0.18
  -4  -3  -4    1.46    0.16
   4   3   4    1.36    0.15
   4   3   4    1.39    0.18
   4   3   4    1.17    0.13
   4   3   4    1.45    0.15
  -3  -3  -4   54.84    2.09
  -3  -3  -4   50.12    2.08
  -3  -3  -4   52.91    2.13
  -3  -3  -4   48.28    2.08
   3   3   4   48.97    2.07
   3   3   4   47.25    2.47
  -2  -3  -4    0.63    0.09
  -2  -3  -4    0.66    0.10
  -2  -3  -4    0.67    0.09
   2   3   4    0.82    0.23
   2   3   4    0.66    0.14
   2   3   4    0.64    0.12
  -1  -3  -4   49.08    2.01
  -1  -3  -4   48.05    2.01
  -1  -3  -4   48.55    2.00
  -1  -3  -4   50.02    2.03
  -1  -3  -4   50.51    2.03
  -1  -3  -4   48.93    2.06
  -1  -3  -4   49.73    2.02
   1   3   4   50.75    2.05
   1   3   4   44.82    2.05
   1   3   4   52.79    2.23
   1   3   4   48.91    2.03
   1   3   4   49.81    2.07
   1   3   4   49.69    2.04
   1   3   4   51.14    2.06
   0  -3  -4    0.87    0.10
   0  -3  -4    0.91    0.09
   0   3   4    0.86    0.08
   0   3   4    0.78    0.09
   0   3   4    0.76    0.12
   0   3   4    0.95    0.09
   1  -3  -4    2.44    0.16
   1  -3  -4    2.70    0.17
  -1   3   4    2.65    0.17
  -1   3   4    2.35    0.13
   2  -3  -4   33.88    1.35
   2  -3  -4   33.34    1.33
   2  -3  -4   30.80    1.33
   2  -3  -4   31.94    1.34
   2  -3  -4   33.17    1.33
   2  -3  -4   29.89    1.39
   2  -3  -4   33.42    1.32
  -2   3   4   31.68    1.36
   3  -3  -4    0.91    0.11
   3  -3  -4    0.86    0.12
   3  -3  -4    1.13    0.13
   3  -3  -4    1.01    0.14
   3  -3  -4    1.13    0.12
   3  -3  -4    1.05    0.12
   3  -3  -4    1.05    0.12
  -3   3   4    1.01    0.10
   4  -3  -4    0.05    0.06
   4  -3  -4    0.08    0.06
   4  -3  -4    0.08    0.07
   4  -3  -4    0.03    0.05
   4  -3  -4    0.03    0.06
   4  -3  -4    0.03    0.06
   4  -3  -4    0.07    0.05
  -4   3   4    0.12    0.05
  -4   3   4    0.09    0.07
  -4   3   4    0.02    0.05
  -4   3   4    0.06    0.05
  -4   3   4    0.05    0.06
  -4   3   4    0.02    0.06
   5  -3  -4    0.24    0.08
   5  -3  -4    0.33    0.09
   5  -3  -4    0.18    0.07
   5  -3  -4    0.17    0.08
   5  -3  -4    0.20    0.09
   5  -3  -4    0.30    0.09
   5  -3  -4    0.31    0.08
   5  -3  -4    0.31    0.08
   5  -3  -4    0.18    0.09
   5  -3  -4    0.30    0.08
   5  -3  -4    0.22    0.09
  -5   3   4    0.31    0.08
  -5   3   4    0.20    0.07
  -5   3   4    0.14    0.10
  -5   3   4    0.11    0.09
  -5   3   4    0.21    0.10
   6  -3  -4    0.68    0.10
   6  -3  -4    0.63    0.09
   6  -3  -4    0.53    0.09
   6  -3  -4    0.73    0.09
   6  -3  -4    0.65    0.13
   6  -3  -4    0.68    0.08
   6  -3  -4    0.72    0.11
   6  -3  -4    0.51    0.18
  -6   3   4    0.65    0.11
  -6   3   4    0.73    0.14
  -6   3   4    0.91    0.13
  -5  -3  -5    0.78    0.10
  -5  -3  -5    0.60    0.11
  -5  -3  -5    0.63    0.09
   5   3   5    0.68    0.08
   5   3   5    0.67    0.12
   5   3   5    0.68    0.09
  -4  -3  -5    1.69    0.16
  -4  -3  -5    1.36    0.17
  -4  -3  -5    1.64    0.18
   4   3   5    1.24    0.14
   4   3   5    1.50    0.15
   4   3   5    1.24    0.17
   4   3   5    1.36    0.15
  -3  -3  -5   44.28    1.90
  -3  -3  -5   45.35    1.86
  -3  -3  -5   44.51    1.86
   3   3   5   43.72    1.84
  -2  -3  -5    2.78    0.19
  -2  -3  -5    2.72    0.18
  -2  -3  -5    2.80    0.21
   2   3   5    2.24    0.21
   2   3   5    3.00    0.26
   2   3   5    2.49    0.35
  -1  -3  -5   11.59    0.55
  -1  -3  -5   11.58    0.52
  -1  -3  -5   12.18    0.53
  -1  -3  -5   11.64    0.54
   1   3   5   12.36    0.62
   1   3   5   10.96    0.72
   1   3   5   12.38    0.61
   1   3   5   11.61    0.56
   1   3   5   11.40    0.57
   0  -3  -5    0.89    0.08
   0  -3  -5    1.12    0.11
   0  -3  -5    1.53    0.13
   0  -3  -5    1.27    0.16
   0  -3  -5    1.08    0.09
   0  -3  -5    1.09    0.11
   0  -3  -5    1.20    0.12
   0   3   5    1.10    0.12
   0   3   5    0.99    0.09
   0   3   5    1.01    0.12
   0   3   5    1.12    0.13
   0   3   5    1.11    0.12
   0   3   5    1.15    0.14
   1  -3  -5   23.86    1.05
   1  -3  -5   23.90    0.99
   1  -3  -5   21.46    0.99
   1  -3  -5   23.09    0.99
   1  -3  -5   24.01    1.00
   1  -3  -5   24.06    1.02
   1  -3  -5   24.18    1.02
   1  -3  -5   24.87    1.04
  -1   3   5   23.20    1.00
  -1   3   5   23.83    1.05
  -1   3   5   25.54    1.05
  -1   3   5   22.96    1.02
  -1   3   5   25.03    1.01
   2  -3  -5    0.47    0.09
   2  -3  -5    0.53    0.08
   2  -3  -5    0.50    0.10
   2  -3  -5    0.50    0.07
   2  -3  -5    0.52    0.09
   2  -3  -5    0.43    0.08
  -2   3   5    0.44    0.06
  -2   3   5    0.50    0.08
  -2   3   5    0.50    0.09
  -2   3   5    0.43    0.07
  -2   3   5    0.43    0.06
   3  -3  -5   10.94    0.49
   3  -3  -5   10.11    0.49
   3  -3  -5   10.49    0.47
   3  -3  -5   10.97    0.47
   3  -3  -5   10.54    0.46
   3  -3  -5   10.62    0.47
   3  -3  -5    9.15    0.56
  -3   3   5    8.04    0.44
  -3   3   5   10.24    0.46
  -3   3   5    9.31    0.43
  -3   3   5    8.68    0.45
   4  -3  -5    0.48    0.11
   4  -3  -5    0.62    0.11
   4  -3  -5    0.44    0.09
   4  -3  -5    0.51    0.10
   4  -3  -5    0.48    0.11
   4  -3  -5    0.62    0.11
   4  -3  -5    0.61    0.10
  -4   3   5    0.37    0.07
  -4   3   5    0.39    0.10
  -4   3   5    0.41    0.07
  -4   3   5    0.41    0.11
  -4   3   5    0.38    0.09
  -4   3   5    0.39    0.10
   5  -3  -5    2.82    0.22
   5  -3  -5    3.11    0.23
   5  -3  -5    2.80    0.22
   5  -3  -5    2.98    0.19
   5  -3  -5    2.95    0.24
   5  -3  -5    3.04    0.21
   5  -3  -5    3.07    0.19
   5  -3  -5    3.15    0.22
   5  -3  -5    3.11    0.20
   5  -3  -5    3.29    0.22
  -5   3   5    2.59    0.24
  -5   3   5    2.91    0.21
  -5   3   5    3.10    0.20
   6  -3  -5    0.07    0.06
   6  -3  -5    0.05    0.06
   6  -3  -5    0.03    0.06
   6  -3  -5    0.00    0.10
   6  -3  -5    0.07    0.06
   6  -3  -5    0.05    0.06
   6  -3  -5    0.02    0.07
  -6   3   5    0.01    0.08
  -5  -3  -6    1.44    0.11
  -5  -3  -6    1.37    0.14
   5   3   6    1.77    0.11
   5   3   6    1.37    0.12
  -4  -3  -6    0.30    0.09
  -4  -3  -6    0.29    0.10
  -4  -3  -6    0.32    0.09
   4   3   6    0.39    0.08
   4   3   6    0.29    0.09
   4   3   6    0.40    0.08
  -3  -3  -6   24.47    1.10
  -3  -3  -6   23.35    1.08
  -3  -3  -6   27.67    1.14
  -3  -3  -6   25.38    1.10
  -3  -3  -6   25.79    1.10
   3   3   6   25.80    1.09
   3   3   6   26.04    1.12
   3   3   6   24.58    1.09
  -2  -3  -6    1.24    0.17
  -2  -3  -6    1.30    0.14
  -2  -3  -6    1.05    0.12
  -2  -3  -6    0.95    0.13
   2   3   6    1.19    0.13
   2   3   6    1.01    0.30
   2   3   6    1.42    0.19
  -1  -3  -6    8.85    0.45
  -1  -3  -6    8.94    0.44
  -1  -3  -6    9.03    0.42
  -1  -3  -6    8.62    0.41
   1   3   6    9.04    0.52
   1   3   6    8.50    0.46
   1   3   6    7.67    0.62
   0  -3  -6    1.73    0.13
   0  -3  -6    1.68    0.12
   0  -3  -6    1.88    0.15
   0  -3  -6    1.78    0.15
   0  -3  -6    1.87    0.15
   0   3   6    1.62    0.13
   0   3   6    1.71    0.16
   0   3   6    1.72    0.19
   0   3   6    1.84    0.16
   0   3   6    1.66    0.16
   0   3   6    1.70    0.17
   0   3   6    1.86    0.14
   1  -3  -6   11.20    0.53
   1  -3  -6   11.46    0.53
   1  -3  -6   11.30    0.51
   1  -3  -6   10.83    0.50
   1  -3  -6   11.04    0.57
   1  -3  -6   10.43    0.50
  -1   3   6   10.36    0.56
  -1   3   6   11.56    0.52
  -1   3   6   10.24    0.54
  -1   3   6   11.89    0.56
  -1   3   6   11.53    0.53
  -1   3   6   11.05    0.53
  -1   3   6   10.84    0.50
   2  -3  -6   -0.02    0.05
   2  -3  -6    0.06    0.08
   2  -3  -6    0.05    0.05
   2  -3  -6    0.03    0.05
   2  -3  -6    0.01    0.06
   2  -3  -6    0.04    0.05
  -2   3   6    0.00    0.04
  -2   3   6    0.07    0.05
  -2   3   6    0.12    0.07
  -2   3   6    0.22    0.07
  -2   3   6    0.00    0.04
  -2   3   6    0.04    0.04
   3  -3  -6   22.17    0.95
   3  -3  -6   22.82    0.99
   3  -3  -6   22.85    0.96
   3  -3  -6   22.11    0.96
   3  -3  -6   23.47    0.96
  -3   3   6   22.86    0.95
  -3   3   6   21.91    0.95
  -3   3   6   21.17    0.96
  -3   3   6   20.97    0.93
  -3   3   6   20.50    0.95
   4  -3  -6    1.42    0.15
   4  -3  -6    1.44    0.15
   4  -3  -6    1.66    0.15
   4  -3  -6    1.49    0.15
   4  -3  -6    1.25    0.14
   4  -3  -6    1.62    0.19
  -4   3   6    1.33    0.22
  -4   3   6    1.21    0.15
  -4   3   6    1.45    0.16
  -4   3   6    1.19    0.14
  -4   3   6    1.45    0.12
  -4   3   6    1.61    0.20
  -4   3   6    1.58    0.14
  -4   3   6    1.27    0.15
   5  -3  -6    1.36    0.16
   5  -3  -6    1.33    0.12
   5  -3  -6    1.07    0.14
   5  -3  -6    1.09    0.17
   5  -3  -6    1.17    0.16
   5  -3  -6    1.29    0.14
   5  -3  -6    1.32    0.15
   5  -3  -6    1.11    0.12
  -5   3   6    1.40    0.16
  -5   3   6    0.98    0.17
  -5   3   6    1.21    0.14
  -5   3   6    1.16    0.13
   6  -3  -6    0.13    0.06
   6  -3  -6    0.01    0.06
   6  -3  -6    0.01    0.07
   6  -3  -6    0.00    0.06
   6  -3  -6    0.02    0.06
   6  -3  -6    0.05    0.11
  -6   3   6    0.03    0.07
  -4  -3  -7    2.83    0.19
  -4  -3  -7    2.89    0.24
   4   3   7    2.68    0.18
   4   3   7    2.94    0.18
   4   3   7    2.93    0.22
  -3  -3  -7    0.25    0.08
  -3  -3  -7    0.26    0.07
  -3  -3  -7    0.14    0.08
  -3  -3  -7    0.44    0.10
   3   3   7    0.25    0.07
   3   3   7    0.42    0.09
   3   3   7    0.15    0.07
  -2  -3  -7   20.60    0.90
  -2  -3  -7   18.94    0.91
   2   3   7   21.72    1.04
   2   3   7   20.38    0.90
  -1  -3  -7    0.53    0.11
  -1  -3  -7    0.59    0.12
  -1  -3  -7    0.58    0.10
  -1  -3  -7    0.50    0.09
  -1  -3  -7    0.62    0.10
   1   3   7    0.46    0.14
   1   3   7    0.79    0.11
   1   3   7    0.45    0.11
   1   3   7    0.45    0.11
   0  -3  -7    3.59    0.21
   0  -3  -7    3.29    0.25
   0  -3  -7    3.59    0.22
   0  -3  -7    3.73    0.22
   0  -3  -7    3.48    0.24
   0   3   7    3.52    0.22
   0   3   7    3.63    0.26
   0   3   7    3.27    0.26
   0   3   7    3.71    0.23
   0   3   7    3.34    0.26
   0   3   7    3.79    0.26
   0   3   7    3.52    0.30
   1  -3  -7    1.53    0.16
   1  -3  -7    1.85    0.15
   1  -3  -7    1.52    0.16
   1  -3  -7    1.72    0.15
   1  -3  -7    1.65    0.13
  -1   3   7    1.63    0.16
  -1   3   7    1.70    0.16
  -1   3   7    1.73    0.14
  -1   3   7    1.69    0.14
  -1   3   7    1.64    0.18
  -1   3   7    1.66    0.17
  -1   3   7    1.43    0.18
   2  -3  -7    0.57    0.10
   2  -3  -7    0.57    0.12
   2  -3  -7    0.59    0.10
   2  -3  -7    0.47    0.08
   2  -3  -7    0.64    0.11
   2  -3  -7    0.69    0.11
  -2   3   7    0.58    0.10
  -2   3   7    0.65    0.11
  -2   3   7    0.60    0.13
  -2   3   7    0.62    0.11
  -2   3   7    0.56    0.09
  -2   3   7    0.69    0.12
   3  -3  -7    2.46    0.19
   3  -3  -7    2.62    0.20
   3  -3  -7    2.79    0.20
   3  -3  -7    2.73    0.20
   3  -3  -7    2.66    0.18
   3  -3  -7    2.61    0.21
  -3   3   7    2.40    0.18
  -3   3   7    2.65    0.21
  -3   3   7    2.74    0.20
  -3   3   7    2.86    0.19
  -3   3   7    2.71    0.20
   4  -3  -7    3.64    0.22
   4  -3  -7    3.44    0.27
   4  -3  -7    3.49    0.24
   4  -3  -7    3.37    0.24
   4  -3  -7    3.52    0.23
   4  -3  -7    3.23    0.21
   4  -3  -7    3.48    0.24
   4  -3  -7    3.67    0.27
   4  -3  -7    3.43    0.22
   4  -3  -7    3.67    0.24
   4  -3  -7    3.60    0.25
  -4   3   7    3.51    0.24
  -4   3   7    3.57    0.25
  -4   3   7    3.30    0.23
  -4   3   7    3.64    0.22
  -4   3   7    2.77    0.23
   5  -3  -7    0.67    0.12
   5  -3  -7    0.67    0.11
   5  -3  -7    0.74    0.10
   5  -3  -7    0.70    0.11
   5  -3  -7    0.72    0.13
   5  -3  -7    0.61    0.09
  -5   3   7    0.53    0.11
  -5   3   7    0.88    0.14
  -5   3   7    0.64    0.10
   6  -3  -7    0.00    0.06
   6  -3  -7   -0.05    0.08
   6  -3  -7   -0.02    0.07
   6  -3  -7    0.02    0.06
   6  -3  -7   -0.03    0.06
  -4  -3  -8    0.84    0.10
   4   3   8    1.01    0.09
   4   3   8    0.78    0.12
  -3  -3  -8    0.85    0.10
  -3  -3  -8    0.66    0.13
  -3  -3  -8    0.70    0.10
   3   3   8    0.71    0.12
   3   3   8    0.50    0.09
   3   3   8    0.71    0.11
  -2  -3  -8    0.47    0.09
  -2  -3  -8    0.27    0.07
  -2  -3  -8    0.28    0.09
  -2  -3  -8    0.28    0.10
   2   3   8    0.45    0.09
   2   3   8    0.29    0.16
   2   3   8    0.26    0.07
   2   3   8    0.36    0.08
  -1  -3  -8    6.54    0.36
  -1  -3  -8    7.00    0.37
   1   3   8    7.18    0.37
   1   3   8    7.48    0.50
   0  -3  -8    1.77    0.18
   0  -3  -8    2.02    0.17
   0  -3  -8    2.07    0.17
   0  -3  -8    1.82    0.19
   0  -3  -8    1.81    0.17
   0   3   8    2.06    0.21
   0   3   8    1.97    0.17
   0   3   8    1.90    0.19
   0   3   8    2.02    0.24
   0   3   8    1.68    0.18
   1  -3  -8   19.57    0.84
   1  -3  -8   19.38    0.83
   1  -3  -8   19.14    0.84
   1  -3  -8   18.46    0.87
   1  -3  -8   19.11    0.87
   1  -3  -8   17.79    0.82
  -1   3   8   16.83    0.91
  -1   3   8   16.78    0.86
  -1   3   8   18.87    0.83
  -1   3   8   19.33    0.89
  -1   3   8   18.34    0.84
  -1   3   8   20.46    0.89
  -1   3   8   18.62    0.88
   2  -3  -8    1.30    0.17
   2  -3  -8    1.56    0.14
   2  -3  -8    1.35    0.16
   2  -3  -8    1.61    0.17
   2  -3  -8    1.67    0.15
  -2   3   8    1.33    0.14
  -2   3   8    1.23    0.17
  -2   3   8    0.96    0.16
  -2   3   8    1.63    0.16
  -2   3   8    1.29    0.15
  -2   3   8    1.44    0.16
   3  -3  -8    0.26    0.09
   3  -3  -8    0.30    0.11
   3  -3  -8    0.27    0.07
   3  -3  -8    0.42    0.12
   3  -3  -8    0.27    0.13
   3  -3  -8    0.30    0.08
   3  -3  -8    0.29    0.11
   3  -3  -8    0.38    0.10
   3  -3  -8    0.29    0.12
   3  -3  -8    0.45    0.10
   3  -3  -8    0.37    0.10
  -3   3   8    0.30    0.09
  -3   3   8    0.26    0.09
  -3   3   8    0.25    0.10
  -3   3   8    0.24    0.09
   4  -3  -8    3.28    0.21
   4  -3  -8    3.41    0.22
   4  -3  -8    3.36    0.24
   4  -3  -8    2.78    0.22
   4  -3  -8    3.13    0.22
   4  -3  -8    3.77    0.24
   4  -3  -8    3.77    0.27
   4  -3  -8    3.18    0.22
   4  -3  -8    3.30    0.25
   4  -3  -8    3.55    0.23
   4  -3  -8    3.05    0.20
  -4   3   8    3.22    0.23
  -4   3   8    3.16    0.24
  -4   3   8    3.33    0.23
  -4   3   8    3.41    0.22
  -4   3   8    2.74    0.23
   5  -3  -8    7.91    0.37
   5  -3  -8    7.47    0.36
   5  -3  -8    7.57    0.40
   5  -3  -8    8.11    0.38
   5  -3  -8    7.07    0.39
   5  -3  -8    7.76    0.42
  -5   3   8    7.62    0.40
  -5   3   8    7.17    0.37
   6  -3  -8    0.06    0.09
   6  -3  -8    0.05    0.08
   6  -3  -8    0.00    0.07
   6  -3  -8    0.00    0.07
  -3  -3  -9    0.50    0.08
  -3  -3  -9    0.45    0.09
   3   3   9    0.52    0.07
   3   3   9    0.45    0.14
  -2  -3  -9    2.39    0.17
  -2  -3  -9    2.51    0.22
  -2  -3  -9    2.63    0.19
   2   3   9    2.87    0.19
   2   3   9    2.82    0.20
   2   3   9    2.34    0.18
  -1  -3  -9    0.12    0.06
  -1  -3  -9    0.20    0.08
  -1  -3  -9    0.12    0.07
  -1  -3  -9    0.06    0.07
  -1  -3  -9    0.27    0.08
  -1  -3  -9    0.21    0.07
   1   3   9    0.01    0.12
   1   3   9    0.19    0.07
   1   3   9    0.12    0.06
   1   3   9    0.11    0.08
   1   3   9    0.03    0.08
   0  -3  -9    2.33    0.22
   0  -3  -9    2.17    0.18
   0  -3  -9    1.95    0.18
   0  -3  -9    2.09    0.18
   0  -3  -9    2.41    0.18
   0  -3  -9    2.11    0.19
   0   3   9    2.21    0.23
   0   3   9    2.28    0.18
   0   3   9    2.13    0.20
   0   3   9    1.78    0.25
   0   3   9    2.06    0.21
   1  -3  -9    7.55    0.41
   1  -3  -9    6.95    0.41
   1  -3  -9    7.59    0.39
   1  -3  -9    6.46    0.36
   1  -3  -9    7.01    0.38
   1  -3  -9    6.77    0.38
   1  -3  -9    7.44    0.38
   1  -3  -9    7.18    0.37
   1  -3  -9    7.81    0.43
   1  -3  -9    7.71    0.40
   1  -3  -9    7.33    0.40
  -1   3   9    7.35    0.43
  -1   3   9    7.22    0.42
  -1   3   9    6.27    0.46
  -1   3   9    7.27    0.41
  -1   3   9    6.44    0.42
  -1   3   9    7.24    0.43
  -1   3   9    7.11    0.41
  -1   3   9    7.75    0.40
   2  -3  -9   39.49    1.60
   2  -3  -9   39.77    1.61
   2  -3  -9   35.15    1.58
   2  -3  -9   39.81    1.64
   2  -3  -9   40.95    1.62
   2  -3  -9   36.00    1.58
   2  -3  -9   37.74    1.61
   2  -3  -9   38.42    1.64
   2  -3  -9   34.74    1.56
   2  -3  -9   36.35    1.57
   2  -3  -9   37.11    1.58
  -2   3   9   36.52    1.60
  -2   3   9   37.45    1.59
  -2   3   9   38.58    1.58
  -2   3   9   35.20    1.62
  -2   3   9   38.26    1.63
  -2   3   9   36.96    1.63
  -2   3   9   35.86    1.63
   3  -3  -9    1.52    0.19
   3  -3  -9    1.83    0.19
   3  -3  -9    1.60    0.16
   3  -3  -9    1.85    0.18
   3  -3  -9    1.79    0.19
   3  -3  -9    2.13    0.22
   3  -3  -9    1.77    0.16
   3  -3  -9    1.37    0.16
   3  -3  -9    1.87    0.20
   3  -3  -9    1.97    0.19
  -3   3   9    1.69    0.17
  -3   3   9    1.70    0.18
  -3   3   9    1.72    0.20
  -3   3   9    1.90    0.18
  -3   3   9    1.62    0.21
   4  -3  -9    2.21    0.20
   4  -3  -9    2.56    0.20
   4  -3  -9    2.43    0.18
   4  -3  -9    2.36    0.19
   4  -3  -9    2.22    0.17
   4  -3  -9    2.36    0.20
   4  -3  -9    2.21    0.28
  -4   3   9    2.29    0.18
  -4   3   9    2.35    0.21
   5  -3  -9    4.64    0.28
   5  -3  -9    4.27    0.27
   5  -3  -9    4.12    0.23
   5  -3  -9    4.18    0.27
   5  -3  -9    4.62    0.24
   5  -3  -9    4.22    0.25
   5  -3  -9    4.60    0.25
  -5   3   9    4.35    0.26
  -2  -3 -10    0.77    0.11
  -2  -3 -10    0.89    0.09
  -2  -3 -10    1.03    0.11
   2   3  10    0.93    0.14
   2   3  10    0.73    0.10
   2   3  10    1.02    0.10
  -1  -3 -10    0.13    0.06
  -1  -3 -10    0.24    0.06
  -1  -3 -10    0.13    0.06
  -1  -3 -10    0.10    0.05
   1   3  10    0.15    0.07
   1   3  10    0.20    0.09
   1   3  10    0.19    0.06
   0  -3 -10    0.05    0.05
   0  -3 -10    0.03    0.07
   0  -3 -10   -0.03    0.06
   0  -3 -10    0.00    0.06
   0  -3 -10   -0.05    0.08
   0   3  10    0.05    0.08
   0   3  10    0.04    0.08
   0   3  10    0.06    0.08
   1  -3 -10    1.45    0.14
   1  -3 -10    1.45    0.17
   1  -3 -10    1.44    0.16
   1  -3 -10    1.55    0.16
   1  -3 -10    1.56    0.16
   1  -3 -10    1.41    0.20
   1  -3 -10    1.40    0.17
   1  -3 -10    1.50    0.17
  -1   3  10    1.35    0.19
  -1   3  10    1.27    0.16
  -1   3  10    1.55    0.19
   2  -3 -10   15.47    0.71
   2  -3 -10   15.99    0.71
   2  -3 -10   15.05    0.69
   2  -3 -10   15.51    0.71
   2  -3 -10   15.58    0.72
   2  -3 -10   15.27    0.74
   2  -3 -10   14.91    0.74
   2  -3 -10   14.13    0.67
  -2   3  10   14.24    0.75
  -2   3  10   15.32    0.72
  -2   3  10   14.64    0.71
  -2   3  10   16.06    0.75
   3  -3 -10    1.44    0.16
   3  -3 -10    1.73    0.17
   3  -3 -10    1.44    0.17
   3  -3 -10    1.25    0.16
   3  -3 -10    1.31    0.13
   3  -3 -10    1.38    0.15
   3  -3 -10    1.24    0.18
   3  -3 -10    1.41    0.15
  -3   3  10    1.38    0.19
  -3   3  10    1.33    0.18
   4  -3 -10    0.97    0.14
   4  -3 -10    1.24    0.13
   4  -3 -10    1.29    0.13
   4  -3 -10    1.20    0.14
   4  -3 -10    1.25    0.12
   4  -3 -10    1.29    0.13
   4  -3 -10    1.15    0.14
  -4   3  10    1.33    0.16
   5  -3 -10   -0.02    0.07
   5  -3 -10   -0.02    0.06
   5  -3 -10   -0.01    0.12
   5  -3 -10    0.03    0.08
   5  -3 -10    0.02    0.07
  -5   3  10    0.03    0.05
  -1  -3 -11    5.12    0.26
  -1  -3 -11    5.29    0.24
  -1  -3 -11    3.91    0.23
   1   3  11    4.46    0.26
   1   3  11    5.25    0.25
   0  -3 -11   13.42    0.63
   0  -3 -11   14.71    0.62
   0  -3 -11   15.13    0.63
   0  -3 -11   14.90    0.63
   0  -3 -11   13.49    0.63
   0   3  11   15.29    0.63
   0   3  11   12.52    0.61
   0   3  11   14.66    0.64
   0   3  11   13.30    0.64
   1  -3 -11    0.81    0.10
   1  -3 -11    0.92    0.11
   1  -3 -11    1.00    0.12
   1  -3 -11    0.79    0.10
   1  -3 -11    0.83    0.11
   1  -3 -11    0.73    0.11
  -1   3  11    0.71    0.17
  -1   3  11    0.96    0.14
  -1   3  11    0.85    0.12
  -1   3  11    0.89    0.12
   2  -3 -11   17.75    0.75
   2  -3 -11   17.48    0.78
   2  -3 -11   16.56    0.77
   2  -3 -11   16.14    0.78
   2  -3 -11   16.70    0.79
   2  -3 -11   17.55    0.77
   2  -3 -11   16.62    0.77
   2  -3 -11   18.16    0.77
  -2   3  11   17.54    0.81
  -2   3  11   18.26    0.75
  -2   3  11   18.08    0.78
   3  -3 -11    0.24    0.06
   3  -3 -11    0.18    0.07
   3  -3 -11    0.15    0.09
   3  -3 -11    0.20    0.07
   3  -3 -11    0.15    0.07
   3  -3 -11    0.09    0.07
   3  -3 -11    0.09    0.06
   3  -3 -11    0.15    0.07
  -3   3  11    0.24    0.07
  -3   3  11    0.15    0.08
  -3   3  11    0.21    0.16
   4  -3 -11    1.14    0.12
   4  -3 -11    1.06    0.12
   4  -3 -11    1.42    0.12
   4  -3 -11    1.26    0.10
   4  -3 -11    1.17    0.11
   4  -3 -11    1.00    0.11
  -4   3  11    1.07    0.11
   0  -3 -12    5.41    0.26
   0   3  12    5.11    0.25
   1  -3 -12    0.28    0.08
   1  -3 -12    0.42    0.06
   1  -3 -12    0.49    0.08
   1  -3 -12    0.28    0.06
  -1   3  12    0.43    0.08
  -1   3  12    0.16    0.08
  -1   3  12    0.45    0.07
   2  -3 -12    0.28    0.06
   2  -3 -12    0.33    0.08
   2  -3 -12    0.20    0.07
   2  -3 -12    0.21    0.05
   2  -3 -12    0.24    0.06
  -2   3  12    0.14    0.08
  -2   3  12    0.26    0.06
   3  -3 -12    0.63    0.06
   3  -3 -12    0.76    0.10
   3  -3 -12    0.56    0.09
   3  -3 -12    0.55    0.07
  -3   3  12    0.46    0.07
  -2  -4  12    0.66    0.09
   2   4 -12    0.47    0.09
   2   4 -12    0.55    0.07
   2   4 -12    0.52    0.07
  -1  -4  12    0.30    0.05
   1   4 -12    0.21    0.05
   1   4 -12    0.15    0.08
   0  -4  12    1.02    0.08
   0   4 -12    0.72    0.09
  -4  -4  11    4.10    0.20
  -4  -4  11    4.12    0.22
   4   4 -11    4.08    0.24
   4   4 -11    3.76    0.21
   4   4 -11    4.02    0.20
   4   4 -11    4.03    0.21
  -3  -4  11    0.04    0.05
  -3  -4  11   -0.09    0.06
  -3  -4  11    0.07    0.08
   3   4 -11    0.03    0.06
   3   4 -11    0.05    0.06
   3   4 -11   -0.08    0.05
   3   4 -11   -0.03    0.08
   3   4 -11   -0.03    0.06
  -2  -4  11    2.53    0.18
  -2  -4  11    2.73    0.17
   2   4 -11    2.66    0.20
   2   4 -11    2.54    0.17
   2   4 -11    2.68    0.20
  -1  -4  11    0.58    0.09
   1   4 -11    0.63    0.10
   1   4 -11    0.50    0.08
   1   4 -11    0.52    0.11
   1   4 -11    0.62    0.09
   0  -4  11    1.20    0.13
   0  -4  11    1.20    0.11
   0   4 -11    1.29    0.12
   0   4 -11    1.15    0.11
   0   4 -11    1.07    0.12
   1  -4  11    0.24    0.05
  -1   4 -11    0.20    0.05
  -5  -4  10    1.76    0.10
   5   4 -10    1.68    0.13
   5   4 -10    1.37    0.14
  -4  -4  10    4.66    0.27
  -4  -4  10    4.74    0.25
   4   4 -10    4.48    0.28
   4   4 -10    4.46    0.27
   4   4 -10    4.85    0.28
   4   4 -10    5.01    0.25
   4   4 -10    5.01    0.25
  -3  -4  10    0.23    0.07
  -3  -4  10    0.28    0.09
   3   4 -10    0.29    0.09
   3   4 -10    0.31    0.10
   3   4 -10    0.30    0.08
   3   4 -10    0.39    0.08
   3   4 -10    0.19    0.09
  -2  -4  10    2.25    0.19
  -2  -4  10    2.57    0.21
  -2  -4  10    2.45    0.18
   2   4 -10    2.63    0.22
   2   4 -10    2.49    0.17
   2   4 -10    2.68    0.19
   2   4 -10    2.77    0.21
  -1  -4  10    0.08    0.07
  -1  -4  10    0.04    0.07
   1   4 -10    0.04    0.08
   1   4 -10    0.05    0.06
   1   4 -10    0.00    0.06
   1   4 -10   -0.07    0.08
   0  -4  10   16.49    0.71
   0  -4  10   14.93    0.70
   0   4 -10   16.17    0.70
   0   4 -10   15.11    0.73
   0   4 -10   16.33    0.71
   1  -4  10    0.38    0.08
   1  -4  10    0.37    0.09
  -1   4 -10    0.34    0.07
  -1   4 -10    0.43    0.08
   2  -4  10    0.40    0.07
   2  -4  10    0.38    0.10
  -2   4 -10    0.32    0.06
  -2   4 -10    0.30    0.08
  -5  -4   9    0.37    0.09
  -5  -4   9    0.52    0.07
  -5  -4   9    0.58    0.09
   5   4  -9    0.43    0.09
   5   4  -9    0.47    0.09
   5   4  -9    0.44    0.07
   5   4  -9    0.57    0.08
   5   4  -9    0.32    0.10
  -4  -4   9    9.82    0.52
  -4  -4   9    9.37    0.47
   4   4  -9    9.60    0.46
   4   4  -9    9.25    0.49
   4   4  -9    9.57    0.50
   4   4  -9    9.50    0.44
   4   4  -9    9.79    0.49
  -3  -4   9    9.36    0.48
  -3  -4   9    9.13    0.48
  -3  -4   9    9.41    0.46
  -3  -4   9    9.42    0.51
   3   4  -9    9.73    0.47
   3   4  -9    9.75    0.50
   3   4  -9    9.63    0.48
   3   4  -9    8.94    0.47
   3   4  -9   10.21    0.52
   3   4  -9   10.13    0.46
  -2  -4   9    0.29    0.12
  -2  -4   9    0.41    0.09
  -2  -4   9    0.40    0.11
  -2  -4   9    0.43    0.15
   2   4  -9    0.42    0.09
   2   4  -9    0.39    0.09
   2   4  -9    0.30    0.11
   2   4  -9    0.34    0.09
   2   4  -9    0.35    0.12
   2   4  -9    0.59    0.11
  -1  -4   9    0.97    0.15
  -1  -4   9    1.01    0.12
  -1  -4   9    0.96    0.16
  -1  -4   9    1.21    0.14
   1   4  -9    1.17    0.14
   1   4  -9    1.07    0.12
   1   4  -9    1.10    0.17
   1   4  -9    1.17    0.14
   1   4  -9    1.20    0.14
   1   4  -9    1.34    0.14
   1   4  -9    1.22    0.17
   0  -4   9    7.32    0.40
   0  -4   9    8.27    0.46
   0  -4   9    6.00    0.47
   0  -4   9    8.02    0.39
   0  -4   9    7.09    0.39
   0   4  -9    7.52    0.38
   0   4  -9    7.25    0.39
   0   4  -9    7.91    0.40
   0   4  -9    7.48    0.40
   0   4  -9    7.33    0.38
   1  -4   9    1.12    0.12
   1  -4   9    0.97    0.20
   1  -4   9    1.19    0.13
  -1   4  -9    1.09    0.12
  -1   4  -9    1.01    0.12
  -1   4  -9    1.01    0.12
  -1   4  -9    1.04    0.14
   2  -4   9    9.17    0.45
   2  -4   9    9.70    0.45
  -2   4  -9    9.55    0.45
  -2   4  -9    9.64    0.45
   3  -4   9    0.03    0.08
   3  -4   9    0.00    0.04
  -3   4  -9    0.03    0.05
  -5  -4   8    1.76    0.16
  -5  -4   8    1.66    0.14
  -5  -4   8    1.78    0.22
   5   4  -8    1.77    0.14
   5   4  -8    1.52    0.13
   5   4  -8    1.61    0.17
   5   4  -8    1.51    0.17
   5   4  -8    1.51    0.14
   5   4  -8    2.11    0.17
   5   4  -8    1.69    0.14
  -4  -4   8    2.06    0.20
  -4  -4   8    2.07    0.24
  -4  -4   8    2.00    0.21
  -4  -4   8    2.09    0.21
  -4  -4   8    2.20    0.20
  -4  -4   8    1.91    0.17
   4   4  -8    2.19    0.20
   4   4  -8    1.74    0.25
   4   4  -8    2.20    0.19
   4   4  -8    1.98    0.16
   4   4  -8    2.14    0.20
   4   4  -8    2.01    0.17
   4   4  -8    2.00    0.17
  -3  -4   8    0.58    0.13
  -3  -4   8    1.04    0.17
  -3  -4   8    0.94    0.16
  -3  -4   8    0.91    0.15
  -3  -4   8    0.73    0.12
   3   4  -8    0.64    0.13
   3   4  -8    0.67    0.12
   3   4  -8    1.00    0.12
   3   4  -8    0.72    0.12
   3   4  -8    0.73    0.14
   3   4  -8    0.89    0.12
  -2  -4   8   46.30    1.97
  -2  -4   8   47.87    1.93
  -2  -4   8   46.40    1.98
   2   4  -8   45.39    1.91
   2   4  -8   43.73    1.92
   2   4  -8   47.73    1.94
  -1  -4   8    1.26    0.17
   1   4  -8    1.38    0.15
   1   4  -8    1.63    0.15
   0  -4   8    0.51    0.15
   0  -4   8    0.86    0.15
   0   4  -8    0.85    0.12
   0   4  -8    0.76    0.12
   1  -4   8    2.18    0.17
   1  -4   8    2.21    0.27
  -1   4  -8    1.68    0.17
  -1   4  -8    2.03    0.24
  -1   4  -8    2.64    0.19
  -1   4  -8    2.05    0.20
  -1   4  -8    2.38    0.19
   2  -4   8   21.26    0.89
   2  -4   8   19.18    0.88
   2  -4   8   20.12    1.03
  -2   4  -8   21.02    0.89
  -2   4  -8   20.63    0.90
  -2   4  -8   19.91    0.88
  -2   4  -8   20.07    0.90
   3  -4   8    4.15    0.24
   3  -4   8    4.20    0.24
  -3   4  -8    4.59    0.25
  -3   4  -8    4.42    0.27
   4  -4   8    4.38    0.20
  -4   4  -8    3.84    0.20
  -4   4  -8    3.87    0.23
  -6  -4   7    0.25    0.06
  -6  -4   7    0.23    0.08
   6   4  -7    0.22    0.08
   6   4  -7    0.25    0.09
   6   4  -7    0.25    0.06
   6   4  -7    0.18    0.05
  -5  -4   7   32.45    1.36
  -5  -4   7   34.14    1.44
  -5  -4   7   32.17    1.39
  -5  -4   7   31.80    1.37
   5   4  -7   33.35    1.36
   5   4  -7   31.97    1.39
   5   4  -7   32.75    1.34
   5   4  -7   32.16    1.35
   5   4  -7   31.61    1.38
   5   4  -7   31.65    1.41
   5   4  -7   32.97    1.37
   5   4  -7   30.40    1.34
  -4  -4   7    0.09    0.10
  -4  -4   7    0.01    0.14
  -4  -4   7    0.14    0.09
  -4  -4   7   -0.01    0.09
  -4  -4   7    0.07    0.07
  -4  -4   7    0.02    0.07
   4   4  -7    0.02    0.08
   4   4  -7    0.04    0.07
   4   4  -7    0.02    0.07
   4   4  -7    0.02    0.07
   4   4  -7    0.07    0.07
   4   4  -7    0.04    0.08
   4   4  -7   -0.01    0.07
   4   4  -7    0.00    0.07
   4   4  -7    0.13    0.07
   4   4  -7   -0.06    0.07
   4   4  -7   -0.04    0.07
  -3  -4   7    8.88    0.48
  -3  -4   7    9.41    0.47
  -3  -4   7    8.47    0.46
  -3  -4   7    9.78    0.47
  -3  -4   7    8.55    0.48
  -3  -4   7   10.36    0.55
  -3  -4   7    9.38    0.46
   3   4  -7    9.16    0.47
   3   4  -7    8.57    0.45
   3   4  -7    9.49    0.47
   3   4  -7    8.97    0.45
  -2  -4   7    3.08    0.20
  -2  -4   7    3.03    0.23
  -2  -4   7    2.91    0.21
  -2  -4   7    2.66    0.21
   2   4  -7    2.85    0.21
   2   4  -7    3.03    0.19
   2   4  -7    2.98    0.20
   2   4  -7    2.93    0.19
  -1  -4   7   70.90    3.02
  -1  -4   7   71.69    2.98
   1   4  -7   73.51    2.94
   1   4  -7   71.31    2.92
   0  -4   7   15.57    0.80
   0  -4   7   14.38    0.76
   0  -4   7   15.89    0.74
   0   4  -7   15.54    0.69
   0   4  -7   14.62    0.68
   1  -4   7   16.11    0.84
   1  -4   7   15.90    0.76
  -1   4  -7   15.60    0.72
  -1   4  -7   15.57    0.72
   2  -4   7    9.22    0.49
   2  -4   7    9.41    0.48
   2  -4   7    9.85    0.60
  -2   4  -7    9.44    0.48
  -2   4  -7    9.38    0.48
  -2   4  -7    9.64    0.53
   3  -4   7    2.67    0.18
   3  -4   7    2.62    0.19
   3  -4   7    2.58    0.21
  -3   4  -7    2.63    0.21
  -3   4  -7    2.71    0.19
  -3   4  -7    2.51    0.21
   4  -4   7    3.04    0.17
   4  -4   7    2.93    0.19
  -4   4  -7    3.03    0.21
  -4   4  -7    3.02    0.18
  -4   4  -7    2.80    0.24
  -6  -4   6    0.03    0.07
  -6  -4   6    0.09    0.07
  -6  -4   6    0.07    0.06
   6   4  -6    0.16    0.07
   6   4  -6    0.14    0.06
   6   4  -6    0.06    0.08
   6   4  -6    0.09    0.05
   6   4  -6    0.04    0.07
   6   4  -6    0.12    0.05
  -5  -4   6    0.16    0.15
  -5  -4   6    0.23    0.12
  -5  -4   6    0.29    0.10
  -5  -4   6    0.43    0.11
  -5  -4   6    0.14    0.09
   5   4  -6    0.36    0.08
   5   4  -6    0.26    0.08
   5   4  -6    0.26    0.09
   5   4  -6    0.22    0.08
   5   4  -6    0.15    0.13
   5   4  -6    0.13    0.07
   5   4  -6    0.85    0.14
   5   4  -6    0.14    0.07
   5   4  -6    0.25    0.09
   5   4  -6    0.24    0.07
  -4  -4   6    0.04    0.06
  -4  -4   6    0.21    0.09
  -4  -4   6    0.00    0.07
  -4  -4   6    0.27    0.11
  -4  -4   6   -0.01    0.07
  -4  -4   6    0.04    0.08
  -4  -4   6    0.13    0.12
  -4  -4   6    0.04    0.09
   4   4  -6    0.09    0.08
   4   4  -6    0.05    0.08
   4   4  -6    0.02    0.07
   4   4  -6   -0.02    0.08
   4   4  -6    0.05    0.07
   4   4  -6    0.15    0.07
   4   4  -6    0.08    0.07
  -3  -4   6    3.74    0.35
  -3  -4   6    4.48    0.29
  -3  -4   6    4.62    0.28
  -3  -4   6    4.81    0.32
  -3  -4   6    5.38    0.34
  -3  -4   6    4.66    0.29
  -3  -4   6    5.18    0.28
  -3  -4   6    5.24    0.30
  -3  -4   6    5.09    0.29
  -3  -4   6    4.65    0.31
   3   4  -6    4.92    0.28
   3   4  -6    5.00    0.29
   3   4  -6    5.05    0.28
   3   4  -6    4.72    0.27
   3   4  -6    4.76    0.27
   3   4  -6    4.79    0.29
  -2  -4   6    0.47    0.10
  -2  -4   6    0.42    0.09
  -2  -4   6    0.36    0.08
  -2  -4   6    0.42    0.09
  -2  -4   6    0.42    0.09
  -2  -4   6    0.37    0.10
  -2  -4   6    0.53    0.13
   2   4  -6    0.40    0.07
   2   4  -6    0.37    0.08
   2   4  -6    0.54    0.10
   2   4  -6    0.60    0.10
   2   4  -6    0.49    0.08
   2   4  -6    0.46    0.08
  -1  -4   6   23.41    1.06
  -1  -4   6   22.43    1.15
  -1  -4   6   27.67    1.15
  -1  -4   6   25.52    1.11
   1   4  -6   25.98    1.07
   1   4  -6   24.80    1.05
   1   4  -6   24.63    1.08
   1   4  -6   25.93    1.06
   1   4  -6   26.08    1.08
   0  -4   6    3.11    0.23
   0  -4   6    3.17    0.23
   0  -4   6    2.59    0.24
   0   4  -6    2.89    0.18
   0   4  -6    3.02    0.20
   1  -4   6   13.35    0.65
   1  -4   6   14.20    0.73
  -1   4  -6   13.30    0.62
  -1   4  -6   13.18    0.61
   2  -4   6   11.46    0.62
   2  -4   6    8.60    0.74
  -2   4  -6   11.00    0.51
  -2   4  -6   10.25    0.50
   3  -4   6   15.85    0.75
   3  -4   6   16.08    0.74
   3  -4   6   17.99    0.76
   3  -4   6   16.65    0.76
   3  -4   6   16.90    0.78
  -3   4  -6   16.93    0.76
  -3   4  -6   15.89    0.75
  -3   4  -6   16.82    0.76
  -3   4  -6   16.35    0.76
  -3   4  -6   16.88    0.78
   4  -4   6    0.01    0.05
   4  -4   6    0.01    0.07
   4  -4   6    0.02    0.05
  -4   4  -6    0.11    0.09
  -4   4  -6    0.08    0.07
  -4   4  -6    0.02    0.06
   5  -4   6    0.73    0.06
   5  -4   6    0.74    0.12
  -5   4  -6    0.64    0.08
  -6  -4   5    0.42    0.17
  -6  -4   5    0.55    0.09
  -6  -4   5    0.42    0.09
   6   4  -5    0.39    0.09
   6   4  -5    0.22    0.09
   6   4  -5    0.32    0.09
   6   4  -5    0.37    0.08
   6   4  -5    0.33    0.07
   6   4  -5    0.34    0.07
   6   4  -5    0.31    0.07
  -5  -4   5    0.98    0.15
  -5  -4   5    0.82    0.16
  -5  -4   5    0.93    0.16
  -5  -4   5    0.82    0.13
  -5  -4   5    0.96    0.13
  -5  -4   5    0.79    0.13
  -5  -4   5    0.93    0.16
   5   4  -5    1.04    0.15
   5   4  -5    0.77    0.15
   5   4  -5    0.89    0.13
   5   4  -5    0.69    0.13
   5   4  -5    0.81    0.14
   5   4  -5    0.86    0.13
   5   4  -5    0.83    0.13
   5   4  -5    0.91    0.11
   5   4  -5    0.69    0.11
   5   4  -5    0.91    0.11
   5   4  -5    0.87    0.12
  -4  -4   5    3.86    0.26
  -4  -4   5    3.78    0.26
  -4  -4   5    3.74    0.24
  -4  -4   5    3.85    0.30
  -4  -4   5    4.24    0.24
  -4  -4   5    3.92    0.26
  -4  -4   5    3.44    0.26
  -4  -4   5    4.04    0.27
  -4  -4   5    4.29    0.31
   4   4  -5    3.36    0.26
   4   4  -5    3.75    0.24
   4   4  -5    3.60    0.24
   4   4  -5    3.46    0.24
   4   4  -5    4.26    0.27
   4   4  -5    4.05    0.25
   4   4  -5    3.42    0.25
  -3  -4   5   99.96    3.79
  -3  -4   5   90.77    3.73
  -3  -4   5   92.19    3.76
  -3  -4   5   97.71    3.79
  -3  -4   5   90.20    3.74
  -3  -4   5   91.35    3.73
  -3  -4   5   94.29    3.75
  -3  -4   5   92.56    3.74
   3   4  -5   91.90    3.73
   3   4  -5   88.23    3.72
   3   4  -5   89.36    3.75
   3   4  -5   92.81    3.73
   3   4  -5   90.30    3.73
   3   4  -5   89.03    3.77
   3   4  -5   93.84    3.76
  -2  -4   5    1.87    0.14
  -2  -4   5    1.75    0.17
  -2  -4   5    1.84    0.18
  -2  -4   5    1.58    0.14
  -2  -4   5    1.71    0.17
  -2  -4   5    1.96    0.15
   2   4  -5    1.75    0.13
   2   4  -5    1.84    0.13
   2   4  -5    1.91    0.13
   2   4  -5    1.89    0.14
   2   4  -5    1.78    0.14
   2   4  -5    1.79    0.15
   2   4  -5    1.80    0.13
  -1  -4   5   14.59    0.66
  -1  -4   5   14.11    0.63
  -1  -4   5   12.70    0.68
  -1  -4   5   15.82    0.70
   1   4  -5   14.80    0.64
   1   4  -5   14.18    0.62
   1   4  -5   14.25    0.62
   1   4  -5   15.50    0.66
   1   4  -5   15.04    0.65
   0  -4   5    3.22    0.24
   0  -4   5    3.47    0.23
   0  -4   5    3.53    0.23
   0   4  -5    3.46    0.20
   0   4  -5    3.52    0.21
   0   4  -5    3.02    0.21
   0   4  -5    3.36    0.19
   1  -4   5   11.20    0.56
   1  -4   5   12.63    0.74
   1  -4   5   12.05    0.62
   1  -4   5   10.95    0.56
  -1   4  -5   11.72    0.54
  -1   4  -5   11.35    0.52
   2  -4   5   -0.02    0.09
   2  -4   5    0.06    0.07
   2  -4   5    0.10    0.10
  -2   4  -5    0.06    0.06
  -2   4  -5    0.11    0.05
   3  -4   5    6.98    0.70
   3  -4   5    8.77    0.44
  -3   4  -5    9.17    0.45
  -3   4  -5   10.08    0.47
  -3   4  -5    8.89    0.44
   4  -4   5    0.37    0.08
   4  -4   5    0.35    0.09
   4  -4   5    0.31    0.09
   4  -4   5    0.38    0.08
   4  -4   5    0.23    0.09
  -4   4  -5    0.20    0.06
  -4   4  -5    0.47    0.11
  -4   4  -5    0.47    0.10
   5  -4   5    1.32    0.11
   5  -4   5    1.29    0.12
   5  -4   5    1.12    0.13
  -5   4  -5    1.38    0.13
  -5   4  -5    1.37    0.15
  -5   4  -5    1.14    0.12
  -6  -4   4    3.97    0.38
  -6  -4   4    4.80    0.26
  -6  -4   4    4.92    0.26
   6   4  -4    4.69    0.26
   6   4  -4    4.62    0.29
   6   4  -4    4.73    0.25
   6   4  -4    4.96    0.26
   6   4  -4    4.55    0.27
   6   4  -4    5.13    0.27
  -5  -4   4    1.80    0.21
  -5  -4   4    1.95    0.20
  -5  -4   4    1.65    0.17
  -5  -4   4    1.85    0.21
   5   4  -4    1.52    0.15
   5   4  -4    1.91    0.19
   5   4  -4    1.76    0.20
   5   4  -4    2.04    0.19
   5   4  -4    1.94    0.16
   5   4  -4    1.79    0.16
   5   4  -4    1.70    0.16
   5   4  -4    1.90    0.19
   5   4  -4    1.77    0.18
  -4  -4   4    0.33    0.08
  -4  -4   4    0.31    0.10
  -4  -4   4    0.28    0.12
  -4  -4   4    0.50    0.10
  -4  -4   4    0.34    0.10
  -4  -4   4    0.82    0.13
  -4  -4   4    0.43    0.10
  -4  -4   4    0.31    0.12
  -4  -4   4    0.66    0.12
   4   4  -4    0.35    0.08
   4   4  -4    0.41    0.09
   4   4  -4    0.73    0.11
   4   4  -4    0.47    0.10
   4   4  -4    0.35    0.09
  -3  -4   4    0.02    0.05
  -3  -4   4    0.06    0.05
  -3  -4   4    0.04    0.06
  -3  -4   4    0.06    0.08
  -3  -4   4    0.11    0.05
  -3  -4   4    0.09    0.04
  -3  -4   4    0.07    0.06
  -3  -4   4    0.05    0.09
   3   4  -4    0.06    0.06
   3   4  -4    0.02    0.05
   3   4  -4    0.05    0.04
   3   4  -4    0.06    0.05
   3   4  -4    0.04    0.05
   3   4  -4    0.04    0.05
   3   4  -4    0.04    0.06
  -2  -4   4    0.86    0.12
  -2  -4   4    0.96    0.11
  -2  -4   4    0.79    0.09
  -2  -4   4    1.07    0.15
   2   4  -4    0.83    0.09
   2   4  -4    0.93    0.08
   2   4  -4    0.80    0.08
   2   4  -4    0.83    0.09
  -1  -4   4    2.71    0.19
  -1  -4   4    2.88    0.22
  -1  -4   4    2.61    0.17
   1   4  -4    2.63    0.15
   1   4  -4    2.55    0.18
   1   4  -4    2.62    0.20
   1   4  -4    2.85    0.17
   1   4  -4    2.77    0.15
   0  -4   4    0.38    0.07
   0  -4   4    0.27    0.08
   0  -4   4    0.27    0.08
   0   4  -4    0.20    0.05
   1  -4   4  168.67    6.56
   1  -4   4  161.90    6.60
   1  -4   4  157.23    6.54
   1  -4   4  162.86    6.53
   1  -4   4  173.48    6.75
  -1   4  -4  158.52    6.53
  -1   4  -4  153.53    6.51
  -1   4  -4  162.32    6.53
  -1   4  -4  172.14    6.55
   2  -4   4    6.89    0.41
   2  -4   4    6.45    0.39
   2  -4   4    6.30    0.54
   2  -4   4    6.55    0.34
  -2   4  -4    6.88    0.35
  -2   4  -4    6.87    0.36
  -2   4  -4    7.02    0.36
  -2   4  -4    6.19    0.33
   3  -4   4    1.92    0.34
   3  -4   4    1.96    0.17
  -3   4  -4    2.61    0.19
  -3   4  -4    2.23    0.17
  -3   4  -4    2.24    0.19
  -3   4  -4    2.06    0.18
   4  -4   4    0.08    0.08
   4  -4   4    0.14    0.07
   4  -4   4    0.17    0.08
   4  -4   4    0.15    0.07
   4  -4   4    0.02    0.06
   4  -4   4    0.00    0.06
  -4   4  -4    0.03    0.07
  -4   4  -4   -0.01    0.07
  -4   4  -4    0.12    0.08
  -4   4  -4    0.05    0.07
  -4   4  -4    0.13    0.08
  -4   4  -4    0.10    0.08
   5  -4   4    0.11    0.06
   5  -4   4    0.16    0.06
   5  -4   4    0.11    0.07
   5  -4   4    0.07    0.07
  -5   4  -4    0.09    0.06
  -5   4  -4    0.20    0.08
  -5   4  -4    0.14    0.07
  -5   4  -4    0.08    0.07
  -6  -4   3    3.29    0.22
  -6  -4   3    3.65    0.21
  -6  -4   3    3.55    0.21
   6   4  -3    3.41    0.22
   6   4  -3    3.36    0.22
   6   4  -3    3.66    0.21
   6   4  -3    3.45    0.23
   6   4  -3    3.36    0.21
   6   4  -3    3.04    0.23
   6   4  -3    3.36    0.20
  -5  -4   3    5.18    0.31
  -5  -4   3    4.78    0.28
  -5  -4   3    4.93    0.31
  -5  -4   3    4.25    0.29
  -5  -4   3    5.32    0.31
  -5  -4   3    4.54    0.30
   5   4  -3    4.77    0.31
   5   4  -3    4.15    0.27
   5   4  -3    4.81    0.31
   5   4  -3    5.24    0.29
   5   4  -3    4.37    0.28
   5   4  -3    4.56    0.29
   5   4  -3    5.00    0.30
   5   4  -3    5.08    0.27
   5   4  -3    4.75    0.28
  -4  -4   3    4.02    0.30
  -4  -4   3    3.59    0.23
  -4  -4   3    3.68    0.24
  -4  -4   3    3.12    0.22
  -4  -4   3    3.40    0.28
  -4  -4   3    3.55    0.22
  -4  -4   3    3.52    0.21
  -4  -4   3    3.14    0.23
  -4  -4   3    3.39    0.25
   4   4  -3    3.33    0.24
   4   4  -3    3.49    0.23
   4   4  -3    3.58    0.23
   4   4  -3    3.31    0.22
  -3  -4   3    0.06    0.08
  -3  -4   3    0.10    0.10
  -3  -4   3    0.02    0.04
  -3  -4   3    0.09    0.05
  -3  -4   3    0.04    0.06
  -3  -4   3    0.02    0.04
   3   4  -3    0.04    0.04
   3   4  -3    0.02    0.04
   3   4  -3    0.03    0.04
   3   4  -3    0.13    0.05
   3   4  -3    0.31    0.07
   3   4  -3   -0.01    0.04
  -2  -4   3    6.05    0.29
  -2  -4   3    5.81    0.30
  -2  -4   3    5.62    0.31
  -2  -4   3    5.66    0.28
  -2  -4   3    5.55    0.28
   2   4  -3    5.94    0.30
   2   4  -3    5.70    0.34
   2   4  -3    5.55    0.27
   2   4  -3    6.05    0.29
   2   4  -3    5.62    0.28
   2   4  -3    5.49    0.28
  -1  -4   3   19.28    0.82
   1   4  -3   18.44    0.79
   1   4  -3   18.17    0.77
   1   4  -3   18.79    0.83
   0  -4   3   39.25    1.59
   0  -4   3   38.75    1.62
   0   4  -3   38.90    1.60
   0   4  -3   39.39    1.65
   1  -4   3   20.43    0.98
   1  -4   3   20.54    0.85
   1  -4   3   20.59    0.91
  -1   4  -3   19.46    0.83
  -1   4  -3   18.65    0.82
  -1   4  -3   17.17    0.83
  -1   4  -3   18.96    0.88
   2  -4   3    0.14    0.11
   2  -4   3    0.18    0.06
   2  -4   3    0.55    0.14
   2  -4   3    0.22    0.06
   2  -4   3    0.22    0.11
  -2   4  -3    0.15    0.08
  -2   4  -3    0.46    0.09
  -2   4  -3    0.21    0.08
  -2   4  -3    0.19    0.06
  -2   4  -3    0.47    0.11
   3  -4   3   73.69    2.83
   3  -4   3   67.90    2.78
   3  -4   3   71.83    2.82
   3  -4   3   62.83    3.15
   3  -4   3   73.67    3.02
   3  -4   3   61.63    2.87
  -3   4  -3   67.85    2.85
  -3   4  -3   72.42    2.82
  -3   4  -3   68.52    2.84
  -3   4  -3   70.52    2.80
  -3   4  -3   64.67    2.78
  -3   4  -3   67.68    2.79
   4  -4   3    0.07    0.20
   4  -4   3   -0.05    0.06
   4  -4   3    0.09    0.14
  -4   4  -3    0.08    0.07
  -4   4  -3    0.04    0.07
  -4   4  -3    0.06    0.05
  -4   4  -3    0.05    0.07
  -4   4  -3    0.10    0.07
   5  -4   3    0.41    0.09
   5  -4   3    0.62    0.12
   5  -4   3    0.53    0.08
   5  -4   3    0.37    0.09
   5  -4   3    0.65    0.10
  -5   4  -3    0.66    0.11
  -5   4  -3    0.52    0.10
  -5   4  -3    0.44    0.12
  -5   4  -3    0.53    0.08
   6  -4   3    0.08    0.04
   6  -4   3    0.08    0.08
   6  -4   3    0.08    0.08
  -6   4  -3    0.17    0.05
  -6  -4   2    1.40    0.13
  -6  -4   2    1.58    0.14
  -6  -4   2    1.35    0.14
   6   4  -2    1.36    0.13
   6   4  -2    1.83    0.17
   6   4  -2    1.51    0.15
   6   4  -2    1.55    0.17
   6   4  -2    1.56    0.14
   6   4  -2    1.13    0.13
  -5  -4   2    7.04    0.39
  -5  -4   2    6.83    0.35
  -5  -4   2    6.69    0.36
  -5  -4   2    7.13    0.38
  -5  -4   2    7.46    0.38
   5   4  -2    5.95    0.35
   5   4  -2    6.67    0.36
   5   4  -2    6.74    0.37
   5   4  -2    7.07    0.36
   5   4  -2    6.82    0.37
   5   4  -2    6.97    0.36
   5   4  -2    5.90    0.50
   5   4  -2    6.97    0.40
   5   4  -2    6.25    0.34
   5   4  -2    6.40    0.38
  -4  -4   2   22.32    0.97
  -4  -4   2   21.22    0.97
  -4  -4   2   20.33    0.97
  -4  -4   2   22.40    0.97
  -4  -4   2   22.97    0.99
  -4  -4   2   23.66    1.01
  -4  -4   2   22.60    0.97
   4   4  -2   23.39    1.00
   4   4  -2   22.07    1.14
   4   4  -2   22.47    0.97
   4   4  -2   22.04    1.02
   4   4  -2   22.43    0.97
  -3  -4   2    0.11    0.10
  -3  -4   2    0.07    0.12
  -3  -4   2    0.01    0.06
  -3  -4   2    0.03    0.05
  -3  -4   2    0.02    0.04
  -3  -4   2    0.01    0.04
   3   4  -2    0.05    0.04
   3   4  -2    0.03    0.05
   3   4  -2    0.08    0.10
   3   4  -2    0.01    0.04
   3   4  -2   -0.01    0.04
  -2  -4   2    1.51    0.12
  -2  -4   2    1.90    0.18
  -2  -4   2    1.85    0.12
   2   4  -2    1.55    0.11
   2   4  -2    1.58    0.14
   2   4  -2    1.64    0.12
  -1  -4   2   23.75    1.00
   1   4  -2   24.29    0.99
   1   4  -2   24.40    1.02
   1   4  -2   22.64    0.97
   0  -4   2  516.65   20.69
   0  -4   2  492.15   20.78
   0   4  -2  534.45   20.94
   0   4  -2  528.03   20.72
   1  -4   2    7.87    0.36
   1  -4   2    7.85    0.46
   1  -4   2    7.11    0.34
  -1   4  -2    7.28    0.35
  -1   4  -2    7.49    0.40
   2  -4   2    0.95    0.16
   2  -4   2    1.01    0.19
   2  -4   2    0.96    0.10
   2  -4   2    0.92    0.10
   2  -4   2    0.91    0.11
   2  -4   2    1.08    0.15
   2  -4   2    0.94    0.11
  -2   4  -2    1.00    0.10
  -2   4  -2    0.89    0.13
  -2   4  -2    0.95    0.09
  -2   4  -2    0.98    0.10
   3  -4   2    1.49    0.16
   3  -4   2    1.53    0.13
   3  -4   2    1.37    0.16
   3  -4   2    1.58    0.27
   3  -4   2    1.40    0.14
   3  -4   2    1.60    0.14
   3  -4   2    1.59    0.22
  -3   4  -2    1.47    0.11
  -3   4  -2    1.42    0.13
  -3   4  -2    1.46    0.16
  -3   4  -2    1.51    0.12
  -3   4  -2    1.56    0.15
  -3   4  -2    1.49    0.16
  -3   4  -2    1.48    0.16
   4  -4   2   33.82    1.39
   4  -4   2   34.06    1.43
   4  -4   2   33.17    1.44
   4  -4   2   33.24    1.40
   4  -4   2   30.65    1.63
   4  -4   2   28.21    1.74
  -4   4  -2   36.71    1.44
  -4   4  -2   33.68    1.46
  -4   4  -2   32.19    1.46
  -4   4  -2   32.69    1.42
  -4   4  -2   34.66    1.39
  -4   4  -2   34.33    1.40
  -4   4  -2   33.90    1.42
  -4   4  -2   31.61    1.40
   5  -4   2    7.82    0.39
   5  -4   2    8.61    0.44
   5  -4   2    7.33    0.39
   5  -4   2    7.39    0.37
   5  -4   2    7.37    0.36
   5  -4   2    7.33    0.38
   5  -4   2    7.15    0.37
  -5   4  -2    7.59    0.38
  -5   4  -2    7.85    0.41
  -5   4  -2    7.12    0.39
  -5   4  -2    7.47    0.39
   6  -4   2    0.01    0.04
   6  -4   2    0.03    0.07
   6  -4   2    0.04    0.05
   6  -4   2   -0.01    0.07
  -6   4  -2   -0.01    0.07
  -6   4  -2    0.06    0.06
  -6  -4   1   12.65    0.59
  -6  -4   1   13.03    0.58
  -6  -4   1   13.34    0.60
   6   4  -1   13.02    0.59
   6   4  -1   13.38    0.59
   6   4  -1   13.09    0.60
   6   4  -1   13.06    0.61
   6   4  -1   13.67    0.60
  -5  -4   1    5.20    0.32
  -5  -4   1    5.21    0.31
  -5  -4   1    5.00    0.28
  -5  -4   1    5.41    0.32
   5   4  -1    5.84    0.31
   5   4  -1    4.63    0.44
   5   4  -1    4.75    0.31
   5   4  -1    5.47    0.32
   5   4  -1    5.14    0.30
   5   4  -1    5.34    0.30
   5   4  -1    5.11    0.30
  -4  -4   1    1.94    0.18
  -4  -4   1    1.81    0.16
  -4  -4   1    1.82    0.17
   4   4  -1    1.59    0.16
   4   4  -1    2.18    0.18
   4   4  -1    1.69    0.15
   4   4  -1    1.72    0.24
  -3  -4   1    5.03    0.27
  -3  -4   1    5.00    0.27
  -3  -4   1    5.24    0.27
  -3  -4   1    5.22    0.34
  -3  -4   1    5.72    0.29
   3   4  -1    5.06    0.29
   3   4  -1    5.14    0.28
   3   4  -1    5.58    0.38
   3   4  -1    5.17    0.26
  -2  -4   1    7.75    0.37
  -2  -4   1    7.90    0.37
   2   4  -1    7.72    0.36
   2   4  -1    8.06    0.37
   2   4  -1    7.99    0.53
   2   4  -1    8.04    0.40
  -1  -4   1   27.08    1.14
   1   4  -1   27.82    1.13
   1   4  -1   28.80    1.16
   1   4  -1   26.61    1.12
   0  -4   1    4.61    0.21
   0  -4   1    4.55    0.22
   0   4  -1    4.63    0.24
   0   4  -1    4.22    0.21
   1  -4   1  168.24    6.60
   1  -4   1  160.07    6.57
   1  -4   1  168.24    6.70
   1  -4   1  161.36    6.59
  -1   4  -1  167.18    6.63
  -1   4  -1  166.47    6.59
   2  -4   1    9.36    0.46
   2  -4   1   11.40    0.55
   2  -4   1   10.63    0.49
   2  -4   1   11.01    0.63
   2  -4   1    9.81    0.47
   2  -4   1    9.43    0.45
  -2   4  -1   10.34    0.46
  -2   4  -1   10.23    0.48
  -2   4  -1    9.58    0.45
  -2   4  -1    9.50    0.45
  -2   4  -1    9.93    0.45
  -2   4  -1    9.58    0.52
   3  -4   1    0.11    0.06
   3  -4   1    0.05    0.05
   3  -4   1    0.16    0.12
   3  -4   1    0.08    0.05
   3  -4   1   -0.05    0.05
   3  -4   1    0.14    0.10
   3  -4   1    0.04    0.06
   3  -4   1    0.12    0.07
  -3   4  -1    0.08    0.06
  -3   4  -1    0.11    0.04
  -3   4  -1    0.11    0.08
  -3   4  -1    0.05    0.05
  -3   4  -1    0.06    0.06
  -3   4  -1    0.07    0.06
  -3   4  -1    0.09    0.05
  -3   4  -1    0.09    0.04
   4  -4   1    3.12    0.35
   4  -4   1    3.41    0.22
   4  -4   1    3.56    0.26
   4  -4   1    3.08    0.42
   4  -4   1    3.02    0.22
   4  -4   1    3.72    0.25
  -4   4  -1    3.41    0.26
  -4   4  -1    2.60    0.22
  -4   4  -1    3.32    0.23
  -4   4  -1    3.42    0.21
  -4   4  -1    3.71    0.24
  -4   4  -1    3.50    0.20
  -4   4  -1    3.32    0.23
  -4   4  -1    3.36    0.25
   5  -4   1   18.22    0.78
   5  -4   1   17.96    0.83
   5  -4   1   17.30    0.77
   5  -4   1   18.25    0.78
   5  -4   1   17.83    0.81
   5  -4   1   16.98    0.75
   5  -4   1   16.85    0.76
   5  -4   1   17.02    0.75
   5  -4   1   17.79    0.78
   5  -4   1   17.40    0.83
   5  -4   1   14.15    0.96
  -5   4  -1   16.59    0.83
  -5   4  -1   17.37    0.80
  -5   4  -1   18.62    0.77
  -5   4  -1   18.16    0.79
  -5   4  -1   17.82    0.80
  -5   4  -1   18.14    0.82
  -5   4  -1   16.80    0.77
   6  -4   1    0.33    0.07
   6  -4   1    0.36    0.07
   6  -4   1    0.45    0.09
   6  -4   1    0.41    0.07
   6  -4   1    0.41    0.09
   6  -4   1    0.39    0.06
  -6   4  -1    0.40    0.08
  -6   4  -1    0.30    0.08
  -6   4  -1    0.28    0.12
  -6  -4   0    4.30    0.26
  -6  -4   0    4.81    0.27
   6   4   0    5.14    0.26
   6   4   0    4.69    0.27
   6   4   0    5.26    0.27
   6   4   0    4.67    0.27
   6   4   0    5.12    0.26
  -5  -4   0    0.49    0.09
  -5  -4   0    0.38    0.10
  -5  -4   0    0.30    0.10
  -5  -4   0    0.50    0.12
   5   4   0    0.41    0.09
   5   4   0    0.43    0.09
   5   4   0    0.29    0.14
   5   4   0    0.36    0.09
   5   4   0    0.29    0.09
   5   4   0    0.42    0.09
   5   4   0    0.43    0.11
   5   4   0    0.31    0.09
  -4  -4   0    8.84    0.44
  -4  -4   0    8.86    0.45
  -4  -4   0    9.84    0.49
   4   4   0    8.84    0.44
   4   4   0    8.04    0.58
   4   4   0    8.53    0.43
  -3  -4   0    1.20    0.11
  -3  -4   0    1.08    0.12
  -3  -4   0    1.15    0.11
  -3  -4   0    1.35    0.13
   3   4   0    1.19    0.12
   3   4   0    1.38    0.22
   3   4   0    1.16    0.12
   3   4   0    1.03    0.10
   3   4   0    1.40    0.27
  -2  -4   0  389.81   16.22
   2   4   0  402.63   16.26
   2   4   0  424.04   16.35
   2   4   0  414.68   16.23
   2   4   0  412.38   16.22
  -1  -4   0   13.72    0.61
   1   4   0   15.45    0.61
   1   4   0   14.06    0.60
   1   4   0   14.44    0.62
   0  -4   0   67.23    2.67
   0  -4   0   66.11    2.67
   0   4   0   67.31    2.66
   0   4   0   65.94    2.68
   1  -4   0   13.79    0.65
   1  -4   0   15.58    0.66
   1  -4   0   15.70    0.66
   1  -4   0   16.57    0.76
  -1   4   0   15.62    0.66
  -1   4   0   16.24    0.70
   2  -4   0  446.46   17.17
   2  -4   0  461.38   17.33
   2  -4   0  438.07   17.17
  -2   4   0  407.48   17.23
  -2   4   0  398.43   17.13
  -2   4   0  433.09   17.14
  -2   4   0  439.56   17.22
   3  -4   0    1.20    0.12
   3  -4   0    1.35    0.13
   3  -4   0    1.28    0.14
   3  -4   0    1.57    0.24
   3  -4   0    1.16    0.21
   3  -4   0    1.20    0.13
   3  -4   0    1.29    0.13
  -3   4   0    1.17    0.13
  -3   4   0    1.26    0.11
  -3   4   0    1.21    0.12
  -3   4   0    1.07    0.09
  -3   4   0    1.48    0.13
   4  -4   0    9.40    0.50
   4  -4   0    9.70    0.49
   4  -4   0    9.10    0.45
   4  -4   0    8.83    0.63
   4  -4   0    9.14    0.47
  -4   4   0    9.21    0.47
  -4   4   0    9.45    0.56
  -4   4   0    9.21    0.44
  -4   4   0    9.39    0.50
  -4   4   0   10.19    0.49
  -4   4   0    8.94    0.43
  -4   4   0    9.78    0.50
   5  -4   0    0.44    0.09
   5  -4   0    0.38    0.10
   5  -4   0    0.58    0.11
   5  -4   0    0.34    0.11
   5  -4   0    0.37    0.08
   5  -4   0    0.50    0.10
   5  -4   0    0.40    0.10
   5  -4   0    0.40    0.08
   5  -4   0    0.33    0.08
   5  -4   0    0.27    0.15
   5  -4   0    0.44    0.12
  -5   4   0    0.48    0.12
  -5   4   0    0.44    0.09
  -5   4   0    0.42    0.13
  -5   4   0    0.36    0.11
  -5   4   0    0.45    0.11
  -5   4   0    0.47    0.11
   6  -4   0    4.87    0.25
   6  -4   0    4.74    0.26
   6  -4   0    4.72    0.23
   6  -4   0    4.58    0.24
   6  -4   0    4.68    0.26
   6  -4   0    4.29    0.28
   6  -4   0    4.74    0.24
  -6   4   0    4.68    0.29
  -6   4   0    4.23    0.27
  -6   4   0    4.96    0.26
  -6  -4  -1    0.32    0.08
  -6  -4  -1    0.28    0.08
   6   4   1    0.30    0.07
   6   4   1    0.40    0.08
   6   4   1    0.34    0.07
   6   4   1    0.41    0.07
  -5  -4  -1   17.92    0.83
  -5  -4  -1   17.43    0.78
  -5  -4  -1   16.80    0.75
   5   4   1   17.16    0.77
   5   4   1   18.09    0.80
   5   4   1   18.04    0.78
   5   4   1   17.80    0.78
   5   4   1   14.36    0.95
   5   4   1   18.17    0.83
  -4  -4  -1    3.14    0.23
  -4  -4  -1    3.55    0.26
  -4  -4  -1    3.19    0.21
   4   4   1    3.08    0.21
   4   4   1    3.17    0.34
  -3  -4  -1    0.11    0.07
  -3  -4  -1    0.04    0.05
  -3  -4  -1    0.03    0.04
   3   4   1    0.04    0.05
   3   4   1    0.10    0.12
   3   4   1    0.12    0.10
  -2  -4  -1    9.26    0.45
  -2  -4  -1    9.14    0.43
   2   4   1   10.08    0.51
   2   4   1   10.30    0.58
   2   4   1   10.02    0.46
  -1  -4  -1  151.96    6.30
  -1  -4  -1  157.66    6.31
   1   4   1  159.00    6.39
   1   4   1  164.09    6.31
   0  -4  -1    4.63    0.22
   0  -4  -1    4.66    0.22
   0   4   1    4.41    0.21
   0   4   1    4.64    0.22
   1  -4  -1   29.43    1.22
   1  -4  -1   28.24    1.21
   1  -4  -1   29.89    1.22
  -1   4   1   31.47    1.25
   2  -4  -1    7.99    0.39
   2  -4  -1    8.80    0.41
   2  -4  -1    9.03    0.41
   2  -4  -1    8.78    0.45
   2  -4  -1    9.04    0.52
  -2   4   1    8.05    0.39
  -2   4   1    8.27    0.45
   3  -4  -1    5.14    0.29
   3  -4  -1    5.87    0.32
   3  -4  -1    6.01    0.46
   3  -4  -1    5.44    0.31
   3  -4  -1    5.44    0.29
   3  -4  -1    6.28    0.42
   3  -4  -1    5.53    0.31
  -3   4   1    5.39    0.29
  -3   4   1    5.61    0.30
  -3   4   1    5.43    0.28
  -3   4   1    4.73    0.25
   4  -4  -1    1.71    0.16
   4  -4  -1    1.84    0.26
   4  -4  -1    1.99    0.15
   4  -4  -1    1.78    0.17
   4  -4  -1    1.97    0.18
  -4   4   1    1.67    0.13
  -4   4   1    1.86    0.18
  -4   4   1    1.70    0.16
  -4   4   1    1.90    0.18
  -4   4   1    1.93    0.18
  -4   4   1    1.54    0.12
   5  -4  -1    5.17    0.28
   5  -4  -1    4.95    0.28
   5  -4  -1    5.78    0.33
   5  -4  -1    5.29    0.30
   5  -4  -1    5.51    0.31
   5  -4  -1    5.74    0.34
   5  -4  -1    5.41    0.31
   5  -4  -1    4.79    0.46
   5  -4  -1    5.26    0.30
   5  -4  -1    5.45    0.35
   5  -4  -1    5.34    0.29
  -5   4   1    4.95    0.35
  -5   4   1    5.40    0.33
  -5   4   1    5.68    0.31
  -5   4   1    5.78    0.34
  -5   4   1    5.36    0.35
  -5   4   1    5.41    0.32
  -5   4   1    5.58    0.29
   6  -4  -1   13.80    0.60
   6  -4  -1   13.72    0.60
   6  -4  -1   13.15    0.59
   6  -4  -1   13.65    0.59
   6  -4  -1   13.58    0.58
   6  -4  -1   13.40    0.60
  -6   4   1   13.16    0.60
  -6   4   1   12.98    0.62
  -6  -4  -2    0.04    0.05
  -6  -4  -2    0.01    0.07
   6   4   2    0.02    0.04
   6   4   2    0.05    0.05
   6   4   2    0.02    0.05
   6   4   2    0.01    0.12
  -5  -4  -2    7.73    0.39
  -5  -4  -2    7.49    0.43
   5   4   2    8.20    0.44
   5   4   2    6.82    0.37
   5   4   2    7.68    0.40
   5   4   2    7.76    0.39
   5   4   2    7.42    0.39
  -4  -4  -2   34.31    1.40
  -4  -4  -2   34.01    1.39
  -4  -4  -2   33.56    1.43
  -4  -4  -2   30.31    1.36
   4   4   2   28.19    1.70
   4   4   2   32.08    1.37
   4   4   2   33.83    1.61
  -3  -4  -2    1.45    0.14
  -3  -4  -2    1.56    0.14
  -3  -4  -2    1.54    0.14
   3   4   2    1.61    0.16
   3   4   2    1.66    0.21
   3   4   2    1.37    0.25
  -2  -4  -2    0.96    0.15
  -2  -4  -2    1.31    0.09
  -2  -4  -2    0.89    0.10
  -2  -4  -2    0.78    0.10
   2   4   2    0.97    0.11
   2   4   2    1.15    0.19
   2   4   2    0.99    0.13
  -1  -4  -2    7.08    0.33
  -1  -4  -2    7.06    0.33
   1   4   2    6.93    0.42
   1   4   2    7.16    0.34
   0  -4  -2  501.48   19.91
   0  -4  -2  495.24   20.19
   0   4   2  495.50   19.86
   0   4   2  482.68   20.22
   1  -4  -2   25.86    1.05
   1  -4  -2   25.81    1.06
   1  -4  -2   26.85    1.07
   1  -4  -2   24.46    1.06
   1  -4  -2   25.66    1.05
  -1   4   2   23.91    1.05
  -1   4   2   25.85    1.08
   2  -4  -2    1.63    0.12
   2  -4  -2    1.85    0.21
   2  -4  -2    1.70    0.13
   2  -4  -2    1.79    0.16
   2  -4  -2    1.64    0.12
  -2   4   2    1.77    0.16
   3  -4  -2   -0.04    0.04
   3  -4  -2    0.02    0.06
   3  -4  -2    0.03    0.10
   3  -4  -2    0.03    0.05
   3  -4  -2    0.01    0.06
   3  -4  -2    0.04    0.06
  -3   4   2    0.10    0.05
   4  -4  -2   22.93    1.01
   4  -4  -2   23.52    1.04
   4  -4  -2   21.57    1.17
   4  -4  -2   23.49    1.01
   4  -4  -2   23.50    0.99
  -4   4   2   23.69    1.02
  -4   4   2   23.26    1.03
  -4   4   2   22.26    0.95
  -4   4   2   22.50    0.96
  -4   4   2   22.99    1.01
  -4   4   2   22.79    1.01
   5  -4  -2    6.70    0.34
   5  -4  -2    7.12    0.39
   5  -4  -2    7.02    0.34
   5  -4  -2    6.82    0.35
   5  -4  -2    6.80    0.35
   5  -4  -2    6.40    0.35
   5  -4  -2    5.55    0.49
   5  -4  -2    6.84    0.34
   5  -4  -2    6.17    0.35
   5  -4  -2    7.20    0.36
   5  -4  -2    6.97    0.41
   5  -4  -2    6.90    0.37
  -5   4   2    6.92    0.33
  -5   4   2    7.02    0.34
  -5   4   2    7.00    0.40
  -5   4   2    5.65    0.39
  -5   4   2    6.81    0.38
  -5   4   2    6.28    0.36
   6  -4  -2    1.50    0.12
   6  -4  -2    1.55    0.13
   6  -4  -2    1.11    0.13
   6  -4  -2    1.17    0.19
   6  -4  -2    1.65    0.13
   6  -4  -2    1.34    0.13
   6  -4  -2    1.71    0.15
   6  -4  -2    1.51    0.13
  -6   4   2    1.42    0.15
  -6   4   2    1.38    0.14
  -6   4   2    1.56    0.18
  -6  -4  -3    0.07    0.04
   6   4   3    0.16    0.06
   6   4   3    0.13    0.06
  -5  -4  -3    0.50    0.10
  -5  -4  -3    0.58    0.09
  -5  -4  -3    0.34    0.11
   5   4   3    0.47    0.11
   5   4   3    0.51    0.10
   5   4   3    0.44    0.09
   5   4   3    0.45    0.09
   5   4   3    0.57    0.09
  -4  -4  -3    0.02    0.06
  -4  -4  -3   -0.03    0.08
   4   4   3    0.10    0.22
   4   4   3    0.04    0.06
   4   4   3    0.04    0.13
  -3  -4  -3   70.18    2.81
  -3  -4  -3   72.13    2.85
  -3  -4  -3   67.29    2.80
   3   4   3   73.51    2.99
   3   4   3   66.58    3.17
   3   4   3   62.60    2.87
  -2  -4  -3    0.23    0.06
  -2  -4  -3    0.23    0.06
  -2  -4  -3    0.18    0.07
   2   4   3    0.36    0.14
   2   4   3    0.16    0.09
   2   4   3    0.21    0.07
  -1  -4  -3   19.04    0.83
  -1  -4  -3   19.17    0.83
   1   4   3   19.83    0.96
   1   4   3   18.92    0.83
   1   4   3   19.59    0.84
   0  -4  -3   36.04    1.46
   0  -4  -3   37.26    1.47
   0   4   3   36.10    1.45
   0   4   3   35.29    1.46
   0   4   3   33.49    1.54
   1  -4  -3   18.44    0.79
   1  -4  -3   18.49    0.78
   1  -4  -3   18.25    0.77
   1  -4  -3   19.32    0.86
   1  -4  -3   19.15    0.79
   1  -4  -3   19.11    0.78
  -1   4   3   19.06    0.79
  -1   4   3   17.88    0.85
  -1   4   3   18.27    0.79
  -1   4   3   17.20    0.78
   2  -4  -3    6.27    0.31
   2  -4  -3    7.01    0.32
   2  -4  -3    5.85    0.30
   2  -4  -3    6.18    0.31
   2  -4  -3    6.31    0.35
   2  -4  -3    6.02    0.31
   2  -4  -3    6.60    0.32
  -2   4   3    5.66    0.35
  -2   4   3    6.10    0.31
   3  -4  -3    0.03    0.06
   3  -4  -3    0.06    0.06
   3  -4  -3    0.03    0.05
   3  -4  -3    0.02    0.08
   3  -4  -3    0.01    0.05
   3  -4  -3    0.02    0.05
  -3   4   3    0.00    0.04
   4  -4  -3    3.36    0.24
   4  -4  -3    3.60    0.23
   4  -4  -3    3.42    0.24
   4  -4  -3    3.53    0.21
   4  -4  -3    3.31    0.23
  -4   4   3    3.24    0.24
  -4   4   3    3.13    0.18
  -4   4   3    3.19    0.22
  -4   4   3    3.11    0.22
   5  -4  -3    5.21    0.31
   5  -4  -3    5.03    0.29
   5  -4  -3    4.75    0.27
   5  -4  -3    4.89    0.30
   5  -4  -3    4.46    0.28
   5  -4  -3    5.00    0.26
   5  -4  -3    4.42    0.29
   5  -4  -3    5.23    0.28
   5  -4  -3    4.26    0.28
   5  -4  -3    5.09    0.27
   5  -4  -3    5.35    0.34
  -5   4   3    4.61    0.32
  -5   4   3    4.90    0.31
  -5   4   3    4.44    0.31
  -5   4   3    5.09    0.26
  -5   4   3    5.09    0.27
   6  -4  -3    3.67    0.20
   6  -4  -3    3.03    0.28
   6  -4  -3    3.43    0.20
   6  -4  -3    3.38    0.19
   6  -4  -3    3.68    0.20
   6  -4  -3    3.36    0.22
   6  -4  -3    3.07    0.26
  -6   4   3    3.52    0.23
  -5  -4  -4    0.18    0.07
  -5  -4  -4    0.06    0.07
  -5  -4  -4    0.11    0.07
   5   4   4    0.03    0.05
   5   4   4    0.10    0.06
   5   4   4    0.12    0.08
  -4  -4  -4    0.12    0.08
  -4  -4  -4    0.11    0.07
  -4  -4  -4    0.13    0.10
   4   4   4    0.02    0.06
   4   4   4    0.04    0.06
   4   4   4    0.12    0.09
   4   4   4    0.08    0.06
  -3  -4  -4    2.20    0.18
  -3  -4  -4    2.10    0.16
  -3  -4  -4    2.26    0.18
  -3  -4  -4    2.38    0.20
   3   4   4    2.06    0.35
   3   4   4    2.29    0.17
  -2  -4  -4    6.96    0.36
  -2  -4  -4    6.50    0.33
  -2  -4  -4    6.34    0.33
   2   4   4    6.46    0.38
   2   4   4    6.53    0.54
   2   4   4    6.26    0.40
  -1  -4  -4  152.61    6.51
  -1  -4  -4  161.96    6.57
  -1  -4  -4  161.94    6.51
  -1  -4  -4  165.44    6.54
  -1  -4  -4  164.50    6.54
  -1  -4  -4  164.54    6.53
  -1  -4  -4  165.90    6.52
   1   4   4  166.12    6.55
   1   4   4  159.93    6.54
   1   4   4  165.68    6.56
   1   4   4  162.82    6.55
   1   4   4  166.93    6.74
   1   4   4  164.26    6.59
   0  -4  -4    0.40    0.05
   0  -4  -4    0.18    0.05
   0  -4  -4    0.27    0.06
   0  -4  -4    0.38    0.07
   0  -4  -4    0.32    0.10
   0  -4  -4    0.29    0.05
   0   4   4    0.32    0.08
   0   4   4    0.26    0.06
   0   4   4    0.26    0.10
   0   4   4    0.25    0.06
   0   4   4    0.25    0.07
   0   4   4    0.27    0.06
   1  -4  -4    2.99    0.17
   1  -4  -4    2.74    0.18
   1  -4  -4    2.80    0.20
   1  -4  -4    2.97    0.18
   1  -4  -4    2.80    0.17
  -1   4   4    2.70    0.18
  -1   4   4    2.77    0.15
   2  -4  -4    0.79    0.10
   2  -4  -4    1.21    0.11
   2  -4  -4    0.71    0.10
   2  -4  -4    1.22    0.10
   2  -4  -4    0.97    0.10
   2  -4  -4    0.96    0.10
   2  -4  -4    0.69    0.11
  -2   4   4    0.93    0.10
   3  -4  -4    0.18    0.06
   3  -4  -4    0.06    0.06
   3  -4  -4    0.10    0.05
   3  -4  -4    0.04    0.06
   3  -4  -4    0.03    0.06
   3  -4  -4    0.05    0.07
   3  -4  -4    0.09    0.06
   3  -4  -4    0.05    0.07
  -3   4   4   -0.04    0.04
   4  -4  -4    0.36    0.08
   4  -4  -4    0.35    0.09
   4  -4  -4    0.36    0.09
   4  -4  -4    0.35    0.09
   4  -4  -4    0.55    0.10
   4  -4  -4    0.41    0.09
   4  -4  -4    0.31    0.09
  -4   4   4    0.40    0.07
  -4   4   4    0.44    0.10
  -4   4   4    0.39    0.10
  -4   4   4    0.24    0.07
  -4   4   4    0.41    0.09
   5  -4  -4    1.62    0.17
   5  -4  -4    1.84    0.17
   5  -4  -4    1.76    0.17
   5  -4  -4    1.72    0.14
   5  -4  -4    1.87    0.20
   5  -4  -4    1.62    0.15
   5  -4  -4    1.87    0.18
   5  -4  -4    1.51    0.16
   5  -4  -4    1.78    0.14
   5  -4  -4    1.88    0.15
   5  -4  -4    2.03    0.19
  -5   4   4    1.75    0.19
  -5   4   4    1.73    0.15
  -5   4   4    1.49    0.18
  -5   4   4    1.86    0.14
   6  -4  -4    4.72    0.24
   6  -4  -4    4.66    0.25
   6  -4  -4    4.91    0.26
   6  -4  -4    4.64    0.24
   6  -4  -4    4.04    0.29
   6  -4  -4    4.47    0.24
   6  -4  -4    4.07    0.26
  -6   4   4    4.41    0.26
  -5  -4  -5    1.08    0.11
  -5  -4  -5    1.28    0.14
  -5  -4  -5    1.22    0.12
   5   4   5    1.28    0.11
   5   4   5    1.16    0.12
   5   4   5    1.24    0.14
  -4  -4  -5    0.39    0.10
  -4  -4  -5    0.49    0.12
  -4  -4  -5    0.54    0.11
   4   4   5    0.40    0.08
   4   4   5    0.24    0.07
   4   4   5    0.30    0.08
   4   4   5    0.35    0.11
  -3  -4  -5    8.95    0.47
  -3  -4  -5    8.36    0.43
  -3  -4  -5    8.52    0.42
   3   4   5    8.44    0.42
   3   4   5    7.55    0.71
  -2  -4  -5    0.27    0.07
  -2  -4  -5    0.22    0.08
  -2  -4  -5    0.12    0.06
   2   4   5    0.01    0.11
   2   4   5    0.06    0.07
   2   4   5    0.13    0.11
  -1  -4  -5   12.30    0.53
  -1  -4  -5   11.54    0.54
  -1  -4  -5   11.38    0.58
  -1  -4  -5   11.74    0.59
  -1  -4  -5   11.72    0.53
  -1  -4  -5   11.91    0.55
  -1  -4  -5   11.86    0.52
   1   4   5   10.90    0.57
   1   4   5   10.91    0.56
   1   4   5   12.00    0.54
   1   4   5   11.16    0.73
   1   4   5   12.51    0.62
   1   4   5   12.12    0.57
   1   4   5   11.31    0.58
   1   4   5   11.24    0.59
   0  -4  -5    3.33    0.19
   0  -4  -5    3.55    0.21
   0  -4  -5    3.52    0.22
   0  -4  -5    3.03    0.18
   0  -4  -5    3.47    0.26
   0  -4  -5    3.18    0.21
   0  -4  -5    3.50    0.21
   0   4   5    3.62    0.40
   0   4   5    3.74    0.22
   0   4   5    3.70    0.23
   0   4   5    3.70    0.22
   0   4   5    3.54    0.21
   0   4   5    3.39    0.19
   0   4   5    3.33    0.25
   1  -4  -5   15.76    0.69
   1  -4  -5   15.12    0.67
   1  -4  -5   15.40    0.72
   1  -4  -5   16.22    0.71
   1  -4  -5   15.16    0.66
   1  -4  -5   15.42    0.68
   1  -4  -5   15.65    0.66
  -1   4   5   15.18    0.66
  -1   4   5   14.89    0.65
  -1   4   5   15.51    0.67
  -1   4   5   14.11    0.71
  -1   4   5   15.73    0.71
   2  -4  -5    1.82    0.14
   2  -4  -5    1.75    0.15
   2  -4  -5    1.91    0.15
   2  -4  -5    1.95    0.18
   2  -4  -5    1.80    0.15
   2  -4  -5    2.07    0.14
  -2   4   5    1.84    0.16
  -2   4   5    1.64    0.14
   3  -4  -5   91.51    3.67
   3  -4  -5   90.69    3.69
   3  -4  -5   89.93    3.67
   3  -4  -5   92.97    3.67
   3  -4  -5   88.68    3.66
   4  -4  -5    3.51    0.22
   4  -4  -5    3.78    0.26
   4  -4  -5    3.43    0.23
   4  -4  -5    3.82    0.24
   4  -4  -5    3.80    0.23
   4  -4  -5    3.77    0.23
   4  -4  -5    3.66    0.25
  -4   4   5    3.02    0.22
  -4   4   5    3.39    0.19
  -4   4   5    3.70    0.27
  -4   4   5    3.41    0.24
  -4   4   5    2.95    0.22
   5  -4  -5    0.73    0.11
   5  -4  -5    0.78    0.10
   5  -4  -5    1.00    0.12
   5  -4  -5    0.78    0.10
   5  -4  -5    0.86    0.12
   5  -4  -5    0.72    0.14
   5  -4  -5    0.71    0.12
   5  -4  -5    0.92    0.13
   5  -4  -5    0.60    0.13
   5  -4  -5    0.88    0.12
  -5   4   5    0.78    0.11
  -5   4   5    0.66    0.15
   6  -4  -5    0.32    0.08
   6  -4  -5    0.36    0.13
   6  -4  -5    0.34    0.07
   6  -4  -5    0.25    0.07
   6  -4  -5    0.36    0.07
   6  -4  -5    0.41    0.09
  -6   4   5    0.35    0.09
  -5  -4  -6    0.56    0.07
  -5  -4  -6    0.51    0.12
   5   4   6    0.59    0.09
   5   4   6    0.66    0.07
  -4  -4  -6   -0.01    0.06
  -4  -4  -6    0.11    0.09
  -4  -4  -6    0.08    0.06
   4   4   6    0.06    0.06
   4   4   6    0.09    0.08
   4   4   6    0.08    0.05
  -3  -4  -6   15.78    0.77
  -3  -4  -6   18.04    0.78
  -3  -4  -6   15.67    0.76
  -3  -4  -6   18.39    0.81
  -3  -4  -6   17.09    0.77
   3   4   6   17.57    0.79
   3   4   6   16.38    0.76
   3   4   6   17.45    0.76
  -2  -4  -6    9.49    0.49
  -2  -4  -6   10.94    0.50
  -2  -4  -6   10.88    0.54
  -2  -4  -6   10.34    0.49
  -2  -4  -6   11.00    0.50
   2   4   6    8.49    0.76
   2   4   6    9.85    0.49
   2   4   6   11.43    0.61
  -1  -4  -6   13.66    0.63
  -1  -4  -6   13.84    0.60
  -1  -4  -6   13.48    0.62
  -1  -4  -6   13.17    0.59
   1   4   6   12.64    0.59
   1   4   6   13.76    0.70
   1   4   6   13.54    0.63
   1   4   6   11.83    0.83
   1   4   6   11.47    0.68
   0  -4  -6    2.87    0.18
   0  -4  -6    2.78    0.20
   0  -4  -6    2.71    0.21
   0  -4  -6    3.17    0.21
   0  -4  -6    2.68    0.19
   0  -4  -6    2.76    0.17
   0  -4  -6    2.90    0.25
   0   4   6    2.83    0.22
   0   4   6    2.95    0.18
   0   4   6    2.75    0.24
   0   4   6    2.87    0.19
   0   4   6    3.12    0.21
   0   4   6    3.04    0.21
   0   4   6    2.86    0.22
   1  -4  -6   26.40    1.19
   1  -4  -6   27.09    1.14
   1  -4  -6   26.98    1.12
   1  -4  -6   26.33    1.14
   1  -4  -6   26.67    1.11
   1  -4  -6   26.03    1.11
  -1   4   6   26.04    1.11
  -1   4   6   27.08    1.13
  -1   4   6   25.86    1.10
  -1   4   6   27.75    1.18
  -1   4   6   27.48    1.14
  -1   4   6   26.42    1.15
  -1   4   6   24.00    1.18
   2  -4  -6    0.45    0.10
   2  -4  -6    0.46    0.09
   2  -4  -6    0.31    0.08
   2  -4  -6    0.37    0.08
   2  -4  -6    0.37    0.08
   2  -4  -6    0.56    0.08
  -2   4   6    0.49    0.10
  -2   4   6    0.31    0.07
  -2   4   6    0.36    0.07
  -2   4   6    0.41    0.07
  -2   4   6    0.48    0.09
   3  -4  -6    4.80    0.26
   3  -4  -6    5.22    0.27
   3  -4  -6    4.67    0.26
   3  -4  -6    4.57    0.36
   3  -4  -6    4.74    0.25
   3  -4  -6    4.95    0.29
  -3   4   6    4.39    0.24
  -3   4   6    3.72    0.24
  -3   4   6    3.94    0.25
   4  -4  -6    0.08    0.06
   4  -4  -6    0.00    0.07
   4  -4  -6    0.02    0.08
   4  -4  -6   -0.06    0.06
   4  -4  -6    0.03    0.06
  -4   4   6    0.04    0.06
  -4   4   6    0.10    0.08
  -4   4   6    0.05    0.05
  -4   4   6    0.05    0.06
  -4   4   6    0.07    0.09
  -4   4   6    0.05    0.05
   5  -4  -6    0.19    0.09
   5  -4  -6    0.12    0.13
   5  -4  -6    0.16    0.10
   5  -4  -6    0.27    0.07
   5  -4  -6    0.24    0.08
   5  -4  -6    0.13    0.07
   5  -4  -6    0.12    0.06
   5  -4  -6    0.30    0.07
  -5   4   6    0.21    0.08
  -5   4   6    0.36    0.11
  -5   4   6    0.24    0.07
   6  -4  -6   -0.01    0.06
   6  -4  -6    0.09    0.12
   6  -4  -6    0.10    0.07
   6  -4  -6    0.10    0.06
   6  -4  -6    0.10    0.07
   6  -4  -6    0.09    0.06
  -6   4   6    0.11    0.07
  -4  -4  -7    2.67    0.19
  -4  -4  -7    2.65    0.23
   4   4   7    2.64    0.18
   4   4   7    3.02    0.22
   4   4   7    2.97    0.17
  -3  -4  -7    2.73    0.19
  -3  -4  -7    2.57    0.21
  -3  -4  -7    2.67    0.19
  -3  -4  -7    2.63    0.21
   3   4   7    2.74    0.20
   3   4   7    2.55    0.19
   3   4   7    2.74    0.20
  -2  -4  -7    9.75    0.49
  -2  -4  -7    8.91    0.51
  -2  -4  -7    9.00    0.46
  -2  -4  -7    8.80    0.46
  -2  -4  -7   10.14    0.52
   2   4   7    9.81    0.46
   2   4   7    9.66    0.58
   2   4   7    8.01    0.54
   2   4   7    9.32    0.48
  -1  -4  -7   15.30    0.72
  -1  -4  -7   15.99    0.75
  -1  -4  -7   16.05    0.72
  -1  -4  -7   16.32    0.76
  -1  -4  -7   15.66    0.72
   1   4   7   16.70    0.77
   1   4   7   14.99    0.74
   1   4   7   16.06    0.72
   1   4   7   17.43    0.85
   0  -4  -7   15.15    0.71
   0  -4  -7   16.02    0.74
   0  -4  -7   15.80    0.71
   0  -4  -7   15.61    0.70
   0  -4  -7   16.12    0.74
   0   4   7   16.19    0.76
   0   4   7   15.67    0.72
   0   4   7   15.45    0.81
   0   4   7   16.35    0.77
   0   4   7   15.01    0.77
   0   4   7   16.75    0.76
   0   4   7   16.32    0.72
   1  -4  -7   74.86    2.99
   1  -4  -7   71.60    3.02
   1  -4  -7   74.01    2.99
   1  -4  -7   71.26    2.98
   1  -4  -7   75.90    3.02
  -1   4   7   74.41    2.99
  -1   4   7   74.79    3.02
  -1   4   7   72.07    3.06
  -1   4   7   68.52    3.07
  -1   4   7   72.37    2.98
  -1   4   7   73.74    3.03
  -1   4   7   76.88    3.02
   2  -4  -7    3.27    0.23
   2  -4  -7    2.78    0.20
   2  -4  -7    3.21    0.23
   2  -4  -7    2.94    0.20
   2  -4  -7    3.13    0.20
  -2   4   7    2.90    0.19
  -2   4   7    2.75    0.19
  -2   4   7    3.14    0.22
  -2   4   7    2.88    0.20
  -2   4   7    3.40    0.24
   3  -4  -7    8.95    0.47
   3  -4  -7    8.27    0.44
   3  -4  -7    8.94    0.44
   3  -4  -7    9.38    0.44
   3  -4  -7    9.13    0.45
   3  -4  -7    9.20    0.45
  -3   4   7    9.09    0.43
  -3   4   7    7.88    0.45
  -3   4   7    8.63    0.42
  -3   4   7    8.71    0.45
  -3   4   7    8.77    0.44
   4  -4  -7   -0.03    0.05
   4  -4  -7    0.04    0.06
   4  -4  -7   -0.02    0.06
   4  -4  -7    0.01    0.07
   4  -4  -7    0.03    0.07
   4  -4  -7   -0.03    0.06
   4  -4  -7   -0.02    0.07
   4  -4  -7    0.00    0.07
   4  -4  -7    0.00    0.09
   4  -4  -7    0.02    0.07
   4  -4  -7    0.01    0.06
  -4   4   7    0.00    0.07
  -4   4   7   -0.01    0.06
  -4   4   7    0.01    0.07
  -4   4   7    0.06    0.08
  -4   4   7    0.14    0.07
  -4   4   7    0.04    0.08
   5  -4  -7   31.23    1.29
   5  -4  -7   30.40    1.27
   5  -4  -7   30.59    1.30
   5  -4  -7   29.87    1.31
   5  -4  -7   29.81    1.33
   5  -4  -7   30.05    1.26
  -5   4   7   30.68    1.27
   6  -4  -7    0.21    0.08
   6  -4  -7    0.23    0.08
   6  -4  -7    0.28    0.07
   6  -4  -7    0.22    0.08
  -4  -4  -8    3.59    0.20
   4   4   8    2.96    0.20
   4   4   8    3.64    0.17
  -3  -4  -8    4.65    0.25
  -3  -4  -8    4.56    0.29
  -3  -4  -8    4.49    0.26
   3   4   8    4.82    0.28
   3   4   8    3.83    0.25
   3   4   8    4.60    0.26
  -2  -4  -8   18.91    0.91
  -2  -4  -8   21.54    0.94
  -2  -4  -8   21.19    0.91
  -2  -4  -8   20.30    0.91
   2   4   8   20.54    0.91
   2   4   8   21.65    1.05
   2   4   8   21.63    0.91
   2   4   8   20.61    0.93
  -1  -4  -8    2.31    0.19
  -1  -4  -8    2.30    0.19
  -1  -4  -8    2.39    0.18
  -1  -4  -8    2.43    0.20
  -1  -4  -8    2.34    0.18
  -1  -4  -8    2.58    0.20
  -1  -4  -8    2.38    0.18
   1   4   8    2.56    0.23
   1   4   8    2.28    0.27
   1   4   8    2.82    0.19
   1   4   8    2.21    0.19
   1   4   8    1.43    0.27
   0  -4  -8    0.83    0.14
   0  -4  -8    0.71    0.10
   0  -4  -8    0.78    0.11
   0  -4  -8    0.66    0.12
   0  -4  -8    0.78    0.12
   0  -4  -8    0.89    0.14
   0   4   8    0.82    0.12
   0   4   8    0.72    0.17
   0   4   8    0.75    0.13
   0   4   8    0.96    0.22
   0   4   8    0.73    0.13
   0   4   8    0.85    0.15
   0   4   8    0.64    0.13
   1  -4  -8    1.47    0.16
   1  -4  -8    1.72    0.18
   1  -4  -8    1.67    0.14
   1  -4  -8    1.75    0.18
   1  -4  -8    1.54    0.16
   1  -4  -8    1.67    0.18
  -1   4   8    1.41    0.18
  -1   4   8    1.59    0.17
  -1   4   8    1.67    0.15
  -1   4   8    1.84    0.20
  -1   4   8    1.81    0.16
  -1   4   8    1.65    0.17
  -1   4   8    1.71    0.22
   2  -4  -8   48.77    1.96
   2  -4  -8   46.87    1.96
   2  -4  -8   47.46    1.97
   2  -4  -8   47.84    1.96
   2  -4  -8   47.54    1.99
   2  -4  -8   45.81    1.99
  -2   4   8   47.72    1.99
  -2   4   8   46.29    2.00
  -2   4   8   45.79    1.96
  -2   4   8   45.78    1.95
  -2   4   8   47.84    1.99
   3  -4  -8    0.70    0.11
   3  -4  -8    0.72    0.14
   3  -4  -8    0.71    0.10
   3  -4  -8    0.92    0.14
   3  -4  -8    0.72    0.12
   3  -4  -8    0.86    0.14
   3  -4  -8    0.81    0.15
   3  -4  -8    1.03    0.13
   3  -4  -8    0.61    0.11
   3  -4  -8    0.66    0.12
  -3   4   8    0.73    0.12
  -3   4   8    0.57    0.11
  -3   4   8    0.68    0.14
  -3   4   8    0.65    0.13
  -3   4   8    0.75    0.12
   4  -4  -8    2.27    0.20
   4  -4  -8    2.05    0.20
   4  -4  -8    1.74    0.18
   4  -4  -8    2.17    0.22
   4  -4  -8    2.00    0.23
   4  -4  -8    2.10    0.18
   4  -4  -8    1.86    0.16
  -4   4   8    1.59    0.17
  -4   4   8    1.85    0.17
  -4   4   8    2.23    0.17
  -4   4   8    2.34    0.27
   5  -4  -8    1.43    0.16
   5  -4  -8    1.51    0.13
   5  -4  -8    1.62    0.14
   5  -4  -8    1.51    0.17
   5  -4  -8    1.83    0.15
   5  -4  -8    1.61    0.16
  -5   4   8    1.48    0.17
   6  -4  -8    5.36    0.29
  -3  -4  -9    0.06    0.07
  -3  -4  -9   -0.01    0.05
   3   4   9    0.03    0.05
   3   4   9    0.06    0.06
  -2  -4  -9    8.73    0.44
  -2  -4  -9   10.42    0.46
   2   4   9    9.09    0.45
   2   4   9    9.24    0.44
   2   4   9    8.92    0.46
  -1  -4  -9    0.99    0.13
  -1  -4  -9    0.97    0.12
  -1  -4  -9    1.25    0.13
  -1  -4  -9    1.18    0.13
   1   4   9    1.04    0.13
   1   4   9    1.27    0.14
   1   4   9    0.97    0.13
   1   4   9    1.32    0.22
   1   4   9    1.13    0.13
   0  -4  -9    8.03    0.43
   0  -4  -9    7.35    0.40
   0  -4  -9    7.43    0.42
   0  -4  -9    7.69    0.41
   0  -4  -9    7.80    0.41
   0  -4  -9    7.81    0.42
   0  -4  -9    7.65    0.40
   0  -4  -9    7.65    0.40
   0  -4  -9    8.27    0.41
   0   4   9    7.47    0.42
   0   4   9    7.96    0.52
   0   4   9    8.50    0.51
   0   4   9    8.23    0.44
   0   4   9    8.15    0.47
   0   4   9    7.77    0.41
   1  -4  -9    1.34    0.17
   1  -4  -9    1.22    0.16
   1  -4  -9    1.40    0.16
   1  -4  -9    1.50    0.16
   1  -4  -9    1.26    0.14
   1  -4  -9    1.31    0.18
   1  -4  -9    1.06    0.16
   1  -4  -9    1.20    0.13
   1  -4  -9    1.04    0.14
   1  -4  -9    1.13    0.14
   1  -4  -9    1.29    0.14
  -1   4   9    1.01    0.17
  -1   4   9    1.45    0.17
  -1   4   9    0.79    0.17
  -1   4   9    1.27    0.16
  -1   4   9    1.06    0.17
  -1   4   9    1.25    0.17
  -1   4   9    1.18    0.18
  -1   4   9    0.98    0.19
   2  -4  -9    0.35    0.11
   2  -4  -9    0.41    0.10
   2  -4  -9    0.50    0.12
   2  -4  -9    0.35    0.10
   2  -4  -9    0.52    0.11
   2  -4  -9    0.35    0.09
   2  -4  -9    0.39    0.11
   2  -4  -9    0.34    0.11
   2  -4  -9    0.31    0.09
   2  -4  -9    0.36    0.10
  -2   4   9    0.28    0.12
  -2   4   9    0.48    0.11
  -2   4   9    0.34    0.11
  -2   4   9    0.34    0.11
  -2   4   9    0.28    0.11
  -2   4   9    0.28    0.12
   3  -4  -9    9.18    0.47
   3  -4  -9    9.46    0.52
   3  -4  -9   10.21    0.50
   3  -4  -9    9.05    0.46
   3  -4  -9    9.44    0.47
   3  -4  -9   10.67    0.51
   3  -4  -9    9.29    0.46
   3  -4  -9    9.67    0.52
   3  -4  -9    9.53    0.47
   3  -4  -9   10.19    0.48
  -3   4   9    8.92    0.49
  -3   4   9    9.46    0.48
  -3   4   9    8.92    0.50
  -3   4   9   10.01    0.47
  -3   4   9    9.38    0.48
   4  -4  -9    9.35    0.46
   4  -4  -9    8.93    0.44
   4  -4  -9    9.14    0.42
   4  -4  -9    8.44    0.48
   4  -4  -9    9.32    0.45
   4  -4  -9    9.15    0.46
  -4   4   9    9.03    0.47
  -4   4   9    8.59    0.43
   5  -4  -9    0.41    0.10
   5  -4  -9    0.62    0.09
   5  -4  -9    0.31    0.12
   5  -4  -9    0.45    0.08
   5  -4  -9    0.45    0.09
  -5   4   9    0.47    0.10
  -2  -4 -10    0.24    0.08
  -2  -4 -10    0.29    0.06
   2   4  10    0.34    0.12
   2   4  10    0.35    0.07
   2   4  10    0.28    0.07
  -1  -4 -10    0.30    0.07
  -1  -4 -10    0.37    0.07
  -1  -4 -10    0.35    0.07
  -1  -4 -10    0.38    0.07
   1   4  10    0.44    0.10
   1   4  10    0.40    0.08
   1   4  10    0.24    0.07
   0  -4 -10   15.91    0.72
   0  -4 -10   15.67    0.73
   0  -4 -10   15.89    0.71
   0  -4 -10   15.66    0.73
   0  -4 -10   16.24    0.71
   0   4  10   14.95    0.76
   0   4  10   15.49    0.72
   0   4  10   16.89    0.73
   0   4  10   16.84    0.73
   1  -4 -10    0.02    0.05
   1  -4 -10    0.05    0.07
   1  -4 -10   -0.01    0.06
   1  -4 -10    0.09    0.06
   1  -4 -10    0.25    0.09
   1  -4 -10    0.04    0.08
   1  -4 -10    0.11    0.08
   1  -4 -10    0.05    0.06
  -1   4  10    0.07    0.09
  -1   4  10    0.01    0.10
  -1   4  10    0.04    0.19
  -1   4  10    0.07    0.13
   2  -4 -10    2.42    0.21
   2  -4 -10    2.34    0.19
   2  -4 -10    2.46    0.20
   2  -4 -10    2.35    0.21
   2  -4 -10    2.67    0.19
   2  -4 -10    2.29    0.20
   2  -4 -10    2.59    0.20
  -2   4  10    2.55    0.24
  -2   4  10    2.27    0.23
  -2   4  10    2.54    0.23
  -2   4  10    2.32    0.26
   3  -4 -10    0.17    0.07
   3  -4 -10    0.20    0.12
   3  -4 -10    0.30    0.08
   3  -4 -10    0.38    0.07
   3  -4 -10    0.31    0.09
   3  -4 -10    0.15    0.08
   3  -4 -10    0.28    0.08
   3  -4 -10    0.20    0.09
  -3   4  10    0.22    0.13
  -3   4  10    0.26    0.12
   4  -4 -10    4.42    0.29
   4  -4 -10    4.79    0.25
   4  -4 -10    4.20    0.26
   4  -4 -10    4.28    0.27
   4  -4 -10    5.11    0.26
   4  -4 -10    4.51    0.28
   4  -4 -10    4.35    0.27
  -4   4  10    4.60    0.28
   5  -4 -10    1.82    0.16
   5  -4 -10    1.39    0.14
   5  -4 -10    1.45    0.12
  -1  -4 -11    0.13    0.04
  -1  -4 -11    0.11    0.08
  -1  -4 -11    0.19    0.05
   1   4  11    0.13    0.05
   1   4  11    0.12    0.07
   0  -4 -11    1.33    0.12
   0  -4 -11    0.98    0.11
   0  -4 -11    1.15    0.12
   0  -4 -11    1.17    0.11
   0  -4 -11    1.08    0.11
   0   4  11    1.18    0.12
   0   4  11    1.28    0.13
   0   4  11    0.97    0.13
   1  -4 -11    0.78    0.11
   1  -4 -11    0.41    0.08
   1  -4 -11    0.59    0.10
   1  -4 -11    0.42    0.09
   1  -4 -11    0.54    0.08
   1  -4 -11    0.58    0.10
   1  -4 -11    0.57    0.10
  -1   4  11    0.69    0.12
  -1   4  11    0.78    0.12
  -1   4  11    0.44    0.15
  -1   4  11    0.55    0.10
   2  -4 -11    2.45    0.18
   2  -4 -11    2.56    0.18
   2  -4 -11    2.16    0.18
   2  -4 -11    2.32    0.19
   2  -4 -11    2.45    0.19
   2  -4 -11    2.57    0.18
   2  -4 -11    2.59    0.18
  -2   4  11    2.51    0.26
  -2   4  11    2.61    0.19
   3  -4 -11    0.05    0.06
   3  -4 -11   -0.01    0.08
   3  -4 -11    0.04    0.07
   3  -4 -11    0.04    0.06
   3  -4 -11    0.04    0.07
   3  -4 -11    0.05    0.11
   3  -4 -11   -0.04    0.05
   3  -4 -11    0.00    0.04
  -3   4  11    0.06    0.07
  -3   4  11    0.05    0.09
  -3   4  11   -0.01    0.07
   4  -4 -11    3.53    0.21
   4  -4 -11    3.86    0.22
   4  -4 -11    3.92    0.24
   4  -4 -11    3.74    0.23
   4  -4 -11    3.64    0.20
   4  -4 -11    3.12    0.22
  -4   4  11    3.65    0.20
  -4   4  11    4.22    0.21
   0  -4 -12    0.87    0.09
   0   4  12    1.05    0.09
   1  -4 -12    0.31    0.08
   1  -4 -12    0.29    0.05
   1  -4 -12    0.16    0.04
   1  -4 -12    0.23    0.07
  -1   4  12    0.31    0.07
  -1   4  12    0.32    0.06
  -1   4  12    0.20    0.08
   2  -4 -12    0.32    0.08
   2  -4 -12    0.36    0.06
   2  -4 -12    0.62    0.09
   2  -4 -12    0.57    0.07
   2  -4 -12    0.49    0.06
   2  -4 -12    0.42    0.06
  -2   4  12    0.39    0.09
  -2   4  12    0.60    0.07
  -2  -5  12   10.86    0.45
   2   5 -12    9.73    0.46
  -1  -5  12    3.75    0.21
  -4  -5  11    1.92    0.15
  -4  -5  11    1.96    0.11
   4   5 -11    1.84    0.12
   4   5 -11    1.76    0.16
   4   5 -11    1.84    0.13
   4   5 -11    1.82    0.14
  -3  -5  11    0.27    0.08
  -3  -5  11    0.35    0.07
   3   5 -11    0.22    0.07
   3   5 -11    0.23    0.06
   3   5 -11    0.37    0.08
   3   5 -11    0.27    0.10
  -2  -5  11    0.82    0.10
  -2  -5  11    0.75    0.09
   2   5 -11    0.67    0.11
   2   5 -11    0.48    0.10
   2   5 -11    0.83    0.09
  -1  -5  11    5.58    0.29
  -1  -5  11    5.45    0.28
   1   5 -11    5.67    0.29
   1   5 -11    5.57    0.31
   1   5 -11    5.98    0.29
   0  -5  11    1.51    0.13
   0   5 -11    0.96    0.11
   0   5 -11    1.15    0.11
   1  -5  11   -0.04    0.04
  -1   5 -11   -0.05    0.04
  -4  -5  10    2.67    0.19
  -4  -5  10    3.00    0.17
   4   5 -10    2.78    0.19
   4   5 -10    2.93    0.21
   4   5 -10    2.88    0.17
   4   5 -10    2.61    0.18
  -3  -5  10    0.61    0.09
  -3  -5  10    0.57    0.10
   3   5 -10    0.40    0.10
   3   5 -10    0.47    0.09
   3   5 -10    0.45    0.10
   3   5 -10    0.52    0.10
   3   5 -10    0.52    0.09
  -2  -5  10    0.94    0.12
  -2  -5  10    0.79    0.12
  -2  -5  10    0.73    0.11
   2   5 -10    0.67    0.12
   2   5 -10    0.88    0.12
   2   5 -10    0.90    0.10
  -1  -5  10    4.04    0.23
  -1  -5  10    4.15    0.25
   1   5 -10    4.22    0.27
   1   5 -10    4.16    0.25
   1   5 -10    4.30    0.25
   0  -5  10    5.37    0.29
   0  -5  10    5.37    0.28
   0   5 -10    5.05    0.31
   0   5 -10    5.51    0.29
   1  -5  10    0.26    0.07
  -1   5 -10    0.22    0.08
  -1   5 -10    0.30    0.07
   2  -5  10    4.33    0.22
  -2   5 -10    4.59    0.24
  -2   5 -10    4.05    0.22
  -5  -5   9   -0.02    0.07
  -5  -5   9    0.02    0.07
  -5  -5   9    0.05    0.06
   5   5  -9    0.01    0.08
   5   5  -9   -0.03    0.05
   5   5  -9    0.08    0.08
   5   5  -9    0.08    0.06
   5   5  -9    0.02    0.05
  -4  -5   9    0.49    0.09
  -4  -5   9    0.44    0.10
  -4  -5   9    0.44    0.08
   4   5  -9    0.51    0.08
   4   5  -9    0.44    0.08
   4   5  -9    0.42    0.10
   4   5  -9    0.49    0.10
   4   5  -9    0.40    0.09
   4   5  -9    0.36    0.08
  -3  -5   9    0.57    0.12
  -3  -5   9    0.54    0.10
   3   5  -9    0.52    0.10
   3   5  -9    0.48    0.11
   3   5  -9    0.53    0.12
   3   5  -9    0.45    0.09
  -2  -5   9   -0.02    0.09
  -2  -5   9    0.14    0.08
  -2  -5   9    0.03    0.09
   2   5  -9    0.08    0.08
   2   5  -9    0.09    0.07
   2   5  -9   -0.12    0.09
   2   5  -9   -0.02    0.08
   2   5  -9    0.00    0.07
   2   5  -9    0.08    0.07
  -1  -5   9    0.68    0.10
  -1  -5   9    0.81    0.12
  -1  -5   9    0.69    0.13
   1   5  -9    0.66    0.11
   1   5  -9    0.66    0.11
   1   5  -9    0.61    0.12
   1   5  -9    0.87    0.12
   1   5  -9    0.53    0.10
   1   5  -9    0.61    0.11
   0  -5   9   36.41    1.55
   0  -5   9   38.82    1.63
   0  -5   9   35.12    1.53
   0   5  -9   37.50    1.58
   0   5  -9   37.85    1.57
   0   5  -9   35.84    1.56
   0   5  -9   37.02    1.55
   0   5  -9   37.89    1.56
   1  -5   9    0.20    0.12
   1  -5   9    0.47    0.08
  -1   5  -9    0.34    0.08
  -1   5  -9    0.35    0.08
   2  -5   9    0.93    0.10
  -2   5  -9    0.76    0.10
  -2   5  -9    0.69    0.09
   3  -5   9    0.57    0.07
  -3   5  -9    0.65    0.08
  -5  -5   8    2.34    0.18
  -5  -5   8    2.19    0.15
   5   5  -8    2.05    0.18
   5   5  -8    2.03    0.15
   5   5  -8    2.07    0.15
   5   5  -8    2.18    0.16
   5   5  -8    1.89    0.18
  -4  -5   8    1.52    0.17
  -4  -5   8    1.59    0.15
  -4  -5   8    1.54    0.20
  -4  -5   8    1.29    0.16
   4   5  -8    1.09    0.13
   4   5  -8    1.49    0.14
   4   5  -8    1.34    0.14
   4   5  -8    1.42    0.17
   4   5  -8    1.29    0.16
   4   5  -8    1.63    0.18
  -3  -5   8   42.71    1.71
  -3  -5   8   42.13    1.67
  -3  -5   8   35.72    1.64
  -3  -5   8   38.92    1.67
  -3  -5   8   39.52    1.66
   3   5  -8   37.24    1.67
   3   5  -8   38.97    1.63
   3   5  -8   38.73    1.65
   3   5  -8   39.80    1.70
   3   5  -8   41.60    1.68
   3   5  -8   37.11    1.64
   3   5  -8   39.86    1.67
  -2  -5   8    1.25    0.17
  -2  -5   8    0.97    0.13
  -2  -5   8    1.90    0.22
   2   5  -8    1.53    0.17
   2   5  -8    1.23    0.14
  -1  -5   8    0.00    0.07
   1   5  -8   -0.01    0.06
   1   5  -8    0.02    0.06
   0  -5   8    3.86    0.28
   0  -5   8    3.32    0.31
   0   5  -8    3.71    0.24
   0   5  -8    3.07    0.22
   1  -5   8   34.46    1.48
   1  -5   8   34.19    1.45
   1  -5   8   33.83    1.47
   1  -5   8   35.26    1.64
  -1   5  -8   36.02    1.50
  -1   5  -8   35.51    1.48
  -1   5  -8   36.43    1.49
  -1   5  -8   35.13    1.48
   2  -5   8    0.87    0.11
  -2   5  -8    1.24    0.12
  -2   5  -8    1.07    0.12
   3  -5   8    1.06    0.12
   3  -5   8    1.23    0.11
   3  -5   8    0.94    0.12
  -3   5  -8    1.28    0.14
  -3   5  -8    1.01    0.11
   4  -5   8    0.64    0.06
  -4   5  -8    0.64    0.14
  -6  -5   7    0.15    0.05
  -6  -5   7    0.13    0.08
   6   5  -7    0.18    0.05
   6   5  -7    0.15    0.06
   6   5  -7    0.12    0.08
   6   5  -7    0.09    0.14
   6   5  -7    0.16    0.05
  -5  -5   7    3.20    0.21
  -5  -5   7    2.92    0.19
  -5  -5   7    2.67    0.26
  -5  -5   7    3.10    0.22
   5   5  -7    2.86    0.19
   5   5  -7    2.79    0.23
   5   5  -7    2.98    0.19
   5   5  -7    2.84    0.21
   5   5  -7    2.82    0.20
  -4  -5   7    0.63    0.13
  -4  -5   7    0.34    0.09
  -4  -5   7    0.39    0.10
  -4  -5   7    0.45    0.11
  -4  -5   7    0.39    0.11
  -4  -5   7    0.47    0.09
   4   5  -7    0.35    0.10
   4   5  -7    0.38    0.11
   4   5  -7    0.57    0.10
   4   5  -7    0.47    0.11
   4   5  -7    0.47    0.10
   4   5  -7    0.45    0.09
   4   5  -7    0.56    0.12
   4   5  -7    0.61    0.10
  -3  -5   7    0.30    0.09
  -3  -5   7    0.30    0.11
  -3  -5   7    0.25    0.08
  -3  -5   7    0.30    0.08
  -3  -5   7    0.39    0.11
   3   5  -7    0.24    0.08
   3   5  -7    0.23    0.08
   3   5  -7    0.36    0.09
  -2  -5   7   47.44    2.10
  -2  -5   7   52.95    2.10
  -2  -5   7   48.33    2.13
  -2  -5   7   50.14    2.13
   2   5  -7   52.65    2.11
   2   5  -7   50.91    2.08
   2   5  -7   50.58    2.09
   2   5  -7   52.35    2.11
  -1  -5   7    2.31    0.24
  -1  -5   7    2.61    0.22
   1   5  -7    2.60    0.18
   1   5  -7    2.45    0.18
   0  -5   7   14.04    0.68
   0  -5   7   13.27    0.72
   0  -5   7   13.35    0.87
   0   5  -7   13.29    0.61
   0   5  -7   13.48    0.63
   1  -5   7    6.82    0.40
   1  -5   7    6.78    0.47
  -1   5  -7    6.41    0.35
  -1   5  -7    6.98    0.37
   2  -5   7   38.44    1.62
   2  -5   7   41.16    1.79
   2  -5   7   40.23    1.64
   2  -5   7   35.04    1.60
  -2   5  -7   37.88    1.62
  -2   5  -7   38.92    1.63
  -2   5  -7   39.03    1.64
  -2   5  -7   40.35    1.65
   3  -5   7    5.04    0.31
   3  -5   7    5.17    0.28
   3  -5   7    4.42    0.27
  -3   5  -7    4.80    0.30
  -3   5  -7    5.34    0.29
  -3   5  -7    5.68    0.32
   4  -5   7    0.58    0.09
   4  -5   7    0.69    0.08
   4  -5   7    0.43    0.08
  -4   5  -7    0.58    0.08
  -4   5  -7    0.67    0.15
  -4   5  -7    0.69    0.11
  -6  -5   6   -0.03    0.06
  -6  -5   6    0.03    0.06
  -6  -5   6    0.01    0.07
   6   5  -6    0.02    0.05
   6   5  -6   -0.06    0.05
   6   5  -6    0.02    0.05
   6   5  -6   -0.02    0.06
   6   5  -6    0.04    0.08
  -5  -5   6   18.51    0.84
  -5  -5   6   17.66    0.80
  -5  -5   6   18.03    0.82
  -5  -5   6   17.18    0.79
   5   5  -6   17.52    0.82
   5   5  -6   17.87    0.84
   5   5  -6   17.70    0.77
   5   5  -6   18.32    0.78
   5   5  -6   17.92    0.82
   5   5  -6   18.18    0.80
   5   5  -6   17.61    0.79
  -4  -5   6    0.02    0.09
  -4  -5   6    0.02    0.08
  -4  -5   6    0.03    0.07
  -4  -5   6   -0.08    0.06
  -4  -5   6    0.03    0.08
   4   5  -6    0.07    0.08
   4   5  -6    0.03    0.06
   4   5  -6   -0.02    0.09
   4   5  -6    0.01    0.06
   4   5  -6    0.11    0.12
  -3  -5   6    5.47    0.31
  -3  -5   6    5.69    0.31
  -3  -5   6    5.37    0.31
  -3  -5   6    5.31    0.31
  -3  -5   6    6.39    0.38
  -3  -5   6    5.20    0.34
   3   5  -6    5.16    0.30
   3   5  -6    5.58    0.32
   3   5  -6    5.34    0.31
  -2  -5   6    2.43    0.20
  -2  -5   6    2.46    0.18
  -2  -5   6    2.94    0.19
  -2  -5   6    3.10    0.23
  -2  -5   6    2.60    0.24
   2   5  -6    2.84    0.20
   2   5  -6    2.81    0.19
   2   5  -6    2.84    0.18
   2   5  -6    2.87    0.18
   2   5  -6    2.75    0.20
  -1  -5   6  231.50    8.82
  -1  -5   6  208.49    8.73
  -1  -5   6  218.83    8.77
   1   5  -6  224.46    8.74
   1   5  -6  221.87    8.73
   1   5  -6  220.78    8.72
   1   5  -6  205.27    8.75
   0  -5   6    5.01    0.35
   0  -5   6    5.30    0.32
   0  -5   6    5.33    0.33
   0   5  -6    5.08    0.27
   0   5  -6    5.16    0.30
   0   5  -6    4.95    0.29
   0   5  -6    5.01    0.28
   1  -5   6    0.26    0.09
   1  -5   6    0.49    0.13
  -1   5  -6    0.19    0.06
  -1   5  -6    0.13    0.07
   2  -5   6    3.93    0.59
   2  -5   6    6.27    0.42
  -2   5  -6    5.39    0.31
  -2   5  -6    5.47    0.30
   3  -5   6    9.99    0.48
   3  -5   6   10.53    0.49
   3  -5   6    9.46    0.50
   3  -5   6   10.94    0.51
   3  -5   6   10.77    0.51
   3  -5   6   10.67    0.54
  -3   5  -6   11.04    0.53
  -3   5  -6   10.22    0.51
  -3   5  -6   10.62    0.53
  -3   5  -6   10.39    0.51
  -3   5  -6   10.19    0.51
   4  -5   6    1.02    0.12
   4  -5   6    1.02    0.11
   4  -5   6    1.14    0.11
  -4   5  -6    1.03    0.14
  -4   5  -6    1.34    0.15
  -4   5  -6    1.06    0.11
   5  -5   6    5.38    0.23
  -5   5  -6    4.63    0.24
  -6  -5   5    0.87    0.11
  -6  -5   5    1.01    0.11
   6   5  -5    0.96    0.13
   6   5  -5    0.89    0.11
   6   5  -5    0.83    0.10
   6   5  -5    1.05    0.12
   6   5  -5    0.92    0.10
  -5  -5   5    0.31    0.14
  -5  -5   5    0.31    0.10
  -5  -5   5    0.39    0.12
  -5  -5   5    0.54    0.10
  -5  -5   5    0.44    0.10
  -5  -5   5    0.37    0.12
   5   5  -5    0.33    0.09
   5   5  -5    0.34    0.10
   5   5  -5    0.29    0.09
   5   5  -5    0.41    0.09
   5   5  -5    0.28    0.09
   5   5  -5    0.37    0.12
   5   5  -5    0.43    0.09
   5   5  -5    0.42    0.11
   5   5  -5    0.33    0.10
  -4  -5   5    5.65    0.32
  -4  -5   5    5.46    0.31
  -4  -5   5    6.90    0.50
  -4  -5   5    5.71    0.33
  -4  -5   5    4.95    0.34
  -4  -5   5    6.47    0.34
   4   5  -5    5.64    0.33
   4   5  -5    5.37    0.31
   4   5  -5    5.76    0.32
   4   5  -5    5.39    0.33
  -3  -5   5   23.18    1.00
  -3  -5   5   21.04    0.93
  -3  -5   5   19.86    0.91
  -3  -5   5   20.26    0.91
  -3  -5   5   20.67    0.92
  -3  -5   5   20.61    0.91
   3   5  -5   20.98    0.91
   3   5  -5   21.74    0.92
   3   5  -5   20.21    0.94
   3   5  -5   20.75    0.93
   3   5  -5   20.89    0.91
  -2  -5   5    0.05    0.05
  -2  -5   5    0.10    0.07
  -2  -5   5    0.04    0.05
  -2  -5   5    0.11    0.06
  -2  -5   5    0.03    0.05
   2   5  -5    0.08    0.05
   2   5  -5    0.13    0.05
   2   5  -5    0.04    0.04
   2   5  -5    0.13    0.05
   2   5  -5    0.02    0.05
  -1  -5   5    0.13    0.06
  -1  -5   5    0.23    0.07
  -1  -5   5    0.17    0.07
  -1  -5   5    0.11    0.07
   1   5  -5    0.11    0.04
   1   5  -5    0.19    0.05
   1   5  -5    0.28    0.08
   1   5  -5    0.21    0.06
   1   5  -5    0.20    0.05
   0  -5   5    0.62    0.10
   0  -5   5    0.28    0.08
   0  -5   5    0.38    0.09
   0   5  -5    0.43    0.06
   0   5  -5    0.57    0.10
   0   5  -5    0.40    0.08
   1  -5   5   93.24    3.74
   1  -5   5   80.29    3.66
   1  -5   5   97.61    4.05
  -1   5  -5   86.34    3.63
  -1   5  -5   92.07    3.65
  -1   5  -5   91.28    3.67
  -1   5  -5   90.64    3.65
   2  -5   5    5.61    0.39
   2  -5   5    4.63    0.34
   2  -5   5    4.69    0.49
  -2   5  -5    5.74    0.30
  -2   5  -5    6.03    0.31
   3  -5   5    0.56    0.24
   3  -5   5    0.36    0.08
  -3   5  -5    0.75    0.12
  -3   5  -5    0.81    0.12
  -3   5  -5    0.70    0.12
   4  -5   5    0.95    0.13
   4  -5   5    0.79    0.10
   4  -5   5    0.82    0.10
   4  -5   5    0.89    0.12
   4  -5   5    0.86    0.14
   4  -5   5    0.91    0.10
  -4   5  -5    1.01    0.14
  -4   5  -5    0.80    0.10
  -4   5  -5    0.99    0.14
   5  -5   5   15.37    0.73
   5  -5   5   16.83    0.72
   5  -5   5   17.06    0.69
   5  -5   5   16.34    0.70
  -5   5  -5   15.56    0.71
  -5   5  -5   15.79    0.73
  -5   5  -5   16.50    0.70
  -6  -5   4    6.54    0.33
  -6  -5   4    6.14    0.32
   6   5  -4    6.13    0.31
   6   5  -4    6.29    0.34
   6   5  -4    6.76    0.33
   6   5  -4    6.07    0.32
   6   5  -4    6.21    0.35
  -5  -5   4    8.93    0.48
  -5  -5   4    8.41    0.47
  -5  -5   4    8.91    0.45
  -5  -5   4    9.12    0.47
  -5  -5   4    9.27    0.45
   5   5  -4    9.02    0.47
   5   5  -4    9.81    0.50
   5   5  -4    8.49    0.43
   5   5  -4    9.06    0.45
   5   5  -4    9.20    0.45
   5   5  -4    9.18    0.46
   5   5  -4    8.87    0.48
  -4  -5   4    4.59    0.27
  -4  -5   4    4.11    0.26
  -4  -5   4    4.43    0.26
  -4  -5   4    4.00    0.26
  -4  -5   4    3.88    0.27
  -4  -5   4    3.31    0.32
   4   5  -4    3.88    0.25
   4   5  -4    3.99    0.26
   4   5  -4    3.85    0.27
   4   5  -4    4.28    0.27
  -3  -5   4  151.86    5.80
  -3  -5   4  144.45    5.74
  -3  -5   4  139.70    5.74
  -3  -5   4  141.36    5.74
  -3  -5   4  143.70    5.74
  -3  -5   4  141.72    5.75
   3   5  -4  143.88    5.73
   3   5  -4  141.93    5.74
   3   5  -4  142.07    5.77
   3   5  -4  141.92    5.74
   3   5  -4  139.23    5.75
   3   5  -4  145.03    5.76
  -2  -5   4    1.66    0.13
  -2  -5   4    1.52    0.14
  -2  -5   4    1.22    0.13
  -2  -5   4    1.88    0.15
  -2  -5   4    1.79    0.22
   2   5  -4    1.31    0.11
   2   5  -4    1.59    0.14
   2   5  -4    1.75    0.14
   2   5  -4    1.43    0.11
  -1  -5   4  162.79    6.71
  -1  -5   4  159.45    6.73
   1   5  -4  184.35    6.74
   1   5  -4  168.89    6.70
   1   5  -4  166.17    6.71
   1   5  -4  168.49    6.72
   0  -5   4    0.02    0.04
   0  -5   4    0.02    0.04
   0  -5   4    0.00    0.06
   0   5  -4    0.02    0.03
   0   5  -4    0.06    0.05
   0   5  -4    0.03    0.03
   0   5  -4    0.05    0.06
   1  -5   4   83.11    3.46
   1  -5   4   82.91    3.45
   1  -5   4   87.64    3.49
   1  -5   4   94.73    3.70
   1  -5   4   83.86    3.52
  -1   5  -4   84.04    3.46
  -1   5  -4   83.05    3.45
  -1   5  -4   80.65    3.44
  -1   5  -4   90.24    3.48
   2  -5   4    0.89    0.23
   2  -5   4    0.89    0.14
   2  -5   4    1.14    0.18
   2  -5   4    1.32    0.12
   2  -5   4    1.00    0.11
  -2   5  -4    1.21    0.14
  -2   5  -4    1.22    0.15
  -2   5  -4    1.04    0.13
  -2   5  -4    0.96    0.10
  -2   5  -4    1.16    0.11
   3  -5   4    0.47    0.09
   3  -5   4    0.56    0.24
  -3   5  -4    0.62    0.11
  -3   5  -4    0.65    0.10
  -3   5  -4    0.68    0.12
  -3   5  -4    0.77    0.12
   4  -5   4    0.09    0.07
   4  -5   4    0.06    0.08
   4  -5   4   -0.02    0.06
   4  -5   4    0.04    0.06
   4  -5   4   -0.01    0.06
   4  -5   4   -0.02    0.05
  -4   5  -4    0.00    0.07
  -4   5  -4    0.01    0.07
  -4   5  -4    0.03    0.06
  -4   5  -4    0.07    0.07
  -4   5  -4    0.02    0.07
  -4   5  -4    0.00    0.07
   5  -5   4    0.44    0.07
   5  -5   4    0.50    0.09
   5  -5   4    0.37    0.09
   5  -5   4    0.54    0.07
   5  -5   4    0.45    0.09
  -5   5  -4    0.46    0.09
  -5   5  -4    0.45    0.11
  -5   5  -4    0.47    0.08
  -5   5  -4    0.52    0.09
  -6  -5   3    4.07    0.24
  -6  -5   3    4.50    0.24
  -6  -5   3    4.12    0.24
   6   5  -3    4.06    0.23
   6   5  -3    3.96    0.27
   6   5  -3    4.05    0.24
   6   5  -3    4.03    0.24
   6   5  -3    3.86    0.25
   6   5  -3    4.26    0.25
  -5  -5   3    8.55    0.43
  -5  -5   3    9.35    0.46
  -5  -5   3    7.95    0.44
  -5  -5   3    8.92    0.46
   5   5  -3    8.21    0.47
   5   5  -3    9.68    0.47
   5   5  -3    8.31    0.44
   5   5  -3    9.09    0.44
   5   5  -3    9.39    0.45
   5   5  -3    8.82    0.48
   5   5  -3    8.70    0.42
   5   5  -3    8.63    0.44
  -4  -5   3   43.62    1.75
  -4  -5   3   39.44    1.75
  -4  -5   3   43.43    1.76
  -4  -5   3   40.55    1.74
  -4  -5   3   40.74    1.77
  -4  -5   3   41.98    1.74
   4   5  -3   43.75    1.74
   4   5  -3   39.21    1.73
   4   5  -3   42.66    1.77
  -3  -5   3    0.06    0.06
  -3  -5   3    0.17    0.06
  -3  -5   3    0.16    0.12
  -3  -5   3    0.12    0.06
  -3  -5   3    0.06    0.04
   3   5  -3    0.21    0.07
   3   5  -3    0.14    0.06
   3   5  -3    0.08    0.05
   3   5  -3    0.15    0.06
   3   5  -3    0.18    0.06
  -2  -5   3   89.79    3.66
  -2  -5   3   92.28    3.66
  -2  -5   3   93.90    3.71
  -2  -5   3   86.61    3.67
   2   5  -3   90.09    3.66
   2   5  -3   93.99    3.67
   2   5  -3   88.68    3.67
   2   5  -3   91.39    3.65
   2   5  -3   94.05    3.69
  -1  -5   3   48.31    2.00
   1   5  -3   49.28    1.98
   1   5  -3   47.71    2.02
   0  -5   3   90.69    3.69
   0  -5   3   91.77    3.79
   0  -5   3   95.12    3.72
   0   5  -3   91.22    3.75
   0   5  -3   90.96    3.70
   1  -5   3    2.34    0.24
   1  -5   3    2.56    0.20
   1  -5   3    2.22    0.14
   1  -5   3    2.29    0.16
  -1   5  -3    2.16    0.14
  -1   5  -3    2.29    0.16
  -1   5  -3    2.13    0.16
  -1   5  -3    1.94    0.16
  -1   5  -3    2.24    0.19
   2  -5   3    3.49    0.37
   2  -5   3    4.06    0.30
   2  -5   3    3.36    0.21
   2  -5   3    3.39    0.24
   2  -5   3    3.22    0.27
  -2   5  -3    3.52    0.23
  -2   5  -3    3.01    0.19
  -2   5  -3    3.33    0.19
  -2   5  -3    3.16    0.23
  -2   5  -3    3.61    0.21
  -2   5  -3    3.62    0.23
  -2   5  -3    3.53    0.23
   3  -5   3   19.92    0.89
   3  -5   3   18.00    1.17
   3  -5   3   19.30    0.85
   3  -5   3   17.38    0.93
   3  -5   3   21.02    1.06
  -3   5  -3   19.65    0.85
  -3   5  -3   19.68    0.91
  -3   5  -3   19.67    0.86
  -3   5  -3   19.60    0.91
  -3   5  -3   20.40    0.89
  -3   5  -3   19.95    0.90
  -3   5  -3   19.36    0.84
  -3   5  -3   20.85    0.88
   4  -5   3    0.45    0.09
   4  -5   3    0.50    0.10
   4  -5   3    0.36    0.17
   4  -5   3    0.45    0.09
   4  -5   3    0.40    0.10
   4  -5   3    0.41    0.09
   4  -5   3    0.40    0.09
   4  -5   3    0.44    0.11
  -4   5  -3    0.46    0.10
  -4   5  -3    0.44    0.09
  -4   5  -3    0.53    0.11
  -4   5  -3    0.38    0.13
  -4   5  -3    0.50    0.10
  -4   5  -3    0.68    0.10
  -4   5  -3    0.31    0.09
   5  -5   3    4.47    0.24
   5  -5   3    4.53    0.23
   5  -5   3    4.68    0.27
   5  -5   3    3.88    0.25
   5  -5   3    4.55    0.29
   5  -5   3    4.56    0.25
   5  -5   3    4.30    0.27
  -5   5  -3    4.33    0.27
  -5   5  -3    4.38    0.27
  -5   5  -3    4.38    0.28
  -5   5  -3    4.36    0.24
   6  -5   3    3.54    0.17
   6  -5   3    3.29    0.21
  -6   5  -3    3.26    0.19
  -6  -5   2    0.16    0.07
  -6  -5   2    0.14    0.08
  -6  -5   2    0.12    0.07
   6   5  -2    0.22    0.08
   6   5  -2    0.06    0.07
   6   5  -2    0.06    0.06
   6   5  -2    0.14    0.07
   6   5  -2    0.08    0.08
  -5  -5   2    9.51    0.49
  -5  -5   2    9.39    0.47
  -5  -5   2    9.09    0.44
  -5  -5   2    9.47    0.49
   5   5  -2    9.37    0.49
   5   5  -2    9.77    0.48
   5   5  -2    9.22    0.46
   5   5  -2    8.93    0.46
   5   5  -2    9.33    0.46
   5   5  -2    8.33    0.62
   5   5  -2    9.17    0.47
  -4  -5   2   23.84    1.02
  -4  -5   2   25.94    1.03
  -4  -5   2   24.07    1.06
  -4  -5   2   22.13    1.03
  -4  -5   2   24.96    1.04
   4   5  -2   23.91    1.02
   4   5  -2   24.87    1.05
   4   5  -2   22.42    1.18
   4   5  -2   20.53    1.05
  -3  -5   2   44.46    1.83
  -3  -5   2   44.89    1.85
  -3  -5   2   44.98    1.83
   3   5  -2   44.15    1.83
   3   5  -2   43.36    1.94
   3   5  -2   44.41    1.85
  -2  -5   2    1.70    0.11
  -2  -5   2    1.51    0.12
  -2  -5   2    1.75    0.13
  -2  -5   2    1.71    0.14
   2   5  -2    1.63    0.11
   2   5  -2    1.61    0.12
   2   5  -2    1.62    0.11
   2   5  -2    1.61    0.11
   2   5  -2    1.71    0.15
  -1  -5   2   24.78    1.05
  -1  -5   2   24.81    1.02
   1   5  -2   24.61    1.02
   1   5  -2   25.11    1.07
   1   5  -2   24.92    1.03
   0  -5   2   58.39    2.42
   0  -5   2   57.25    2.33
   0  -5   2   57.15    2.35
   0   5  -2   58.41    2.38
   0   5  -2   57.81    2.34
   1  -5   2   50.79    2.12
   1  -5   2   50.14    1.99
   1  -5   2   48.92    1.96
  -1   5  -2   47.53    1.97
  -1   5  -2   47.54    2.03
  -1   5  -2   44.43    1.96
   2  -5   2    1.18    0.16
   2  -5   2    0.92    0.17
   2  -5   2    0.84    0.11
   2  -5   2    0.72    0.11
   2  -5   2    0.87    0.20
   2  -5   2    0.90    0.11
  -2   5  -2    0.87    0.09
  -2   5  -2    0.76    0.10
  -2   5  -2    1.01    0.11
  -2   5  -2    0.89    0.10
  -2   5  -2    0.88    0.08
  -2   5  -2    0.93    0.13
   3  -5   2   36.59    1.60
   3  -5   2   37.31    1.54
   3  -5   2   37.08    1.58
   3  -5   2   34.84    1.62
   3  -5   2   37.55    1.56
   3  -5   2   39.79    1.75
   3  -5   2   35.78    1.87
  -3   5  -2   35.66    1.52
  -3   5  -2   38.63    1.56
  -3   5  -2   37.28    1.58
  -3   5  -2   37.17    1.53
  -3   5  -2   37.95    1.58
  -3   5  -2   36.64    1.55
  -3   5  -2   36.89    1.60
   4  -5   2    0.46    0.18
   4  -5   2    0.47    0.12
   4  -5   2    0.47    0.09
   4  -5   2    0.48    0.11
   4  -5   2    0.24    0.18
   4  -5   2    0.41    0.09
  -4   5  -2    0.49    0.10
  -4   5  -2    0.65    0.14
  -4   5  -2    0.54    0.11
  -4   5  -2    0.49    0.11
  -4   5  -2    0.32    0.08
  -4   5  -2    0.49    0.11
  -4   5  -2    0.44    0.12
  -4   5  -2    0.40    0.10
   5  -5   2    1.71    0.16
   5  -5   2    1.84    0.15
   5  -5   2    1.68    0.16
   5  -5   2    1.45    0.13
   5  -5   2    1.47    0.17
   5  -5   2    1.71    0.16
   5  -5   2    1.46    0.16
   5  -5   2    2.13    0.15
   5  -5   2    1.72    0.15
  -5   5  -2    1.88    0.18
  -5   5  -2    1.86    0.18
  -5   5  -2    1.69    0.15
  -5   5  -2    1.56    0.16
  -5   5  -2    1.78    0.23
   6  -5   2    0.43    0.07
   6  -5   2    0.40    0.09
   6  -5   2    0.44    0.06
   6  -5   2    0.36    0.06
   6  -5   2    0.35    0.09
  -6   5  -2    0.45    0.09
  -6   5  -2    0.30    0.07
  -6  -5   1   31.22    1.31
  -6  -5   1   32.00    1.32
   6   5  -1   31.79    1.32
   6   5  -1   30.70    1.31
   6   5  -1   30.32    1.34
   6   5  -1   32.03    1.34
   6   5  -1   32.02    1.32
  -5  -5   1    0.78    0.11
  -5  -5   1    1.16    0.15
  -5  -5   1    0.57    0.12
   5   5  -1    0.78    0.11
   5   5  -1    0.85    0.12
   5   5  -1    0.63    0.11
   5   5  -1    0.71    0.11
   5   5  -1    0.87    0.22
   5   5  -1    0.73    0.12
  -4  -5   1   25.48    1.23
  -4  -5   1   29.07    1.21
  -4  -5   1   28.71    1.18
   4   5  -1   25.13    1.15
   4   5  -1   27.72    1.35
  -3  -5   1    3.66    0.22
  -3  -5   1    3.44    0.20
  -3  -5   1    3.46    0.22
   3   5  -1    3.55    0.30
   3   5  -1    3.45    0.22
   3   5  -1    3.56    0.21
  -2  -5   1  395.31   16.05
  -2  -5   1  401.31   16.02
  -2  -5   1  393.17   16.03
  -2  -5   1  430.41   16.04
   2   5  -1  405.61   16.04
   2   5  -1  400.06   16.03
   2   5  -1  401.09   16.08
  -1  -5   1    0.37    0.06
   1   5  -1    0.42    0.06
   1   5  -1    0.46    0.06
   1   5  -1    0.49    0.06
   0  -5   1   11.69    0.50
   0  -5   1   11.58    0.51
   0   5  -1   11.43    0.53
   0   5  -1   11.16    0.49
   1  -5   1    8.17    0.38
   1  -5   1    8.82    0.40
   1  -5   1    8.96    0.50
  -1   5  -1    8.36    0.39
  -1   5  -1    8.43    0.43
   2  -5   1    3.86    0.23
   2  -5   1    4.30    0.24
   2  -5   1    4.50    0.37
   2  -5   1    4.37    0.25
   2  -5   1    3.97    0.23
   2  -5   1    4.57    0.26
   2  -5   1    4.75    0.32
  -2   5  -1    3.96    0.22
  -2   5  -1    4.38    0.25
  -2   5  -1    4.32    0.23
  -2   5  -1    4.09    0.22
  -2   5  -1    4.26    0.24
   3  -5   1    6.04    0.31
   3  -5   1    6.76    0.46
   3  -5   1    5.96    0.32
   3  -5   1    6.33    0.53
   3  -5   1    5.96    0.36
   3  -5   1    6.13    0.33
   3  -5   1    6.45    0.36
   3  -5   1    6.05    0.34
  -3   5  -1    6.45    0.34
  -3   5  -1    6.04    0.36
  -3   5  -1    5.81    0.29
  -3   5  -1    5.95    0.31
  -3   5  -1    6.36    0.34
  -3   5  -1    5.65    0.29
  -3   5  -1    6.26    0.33
   4  -5   1  112.89    4.61
   4  -5   1  119.99    4.65
   4  -5   1  100.16    4.99
   4  -5   1  112.01    4.62
   4  -5   1  110.73    4.88
   4  -5   1  119.80    4.68
  -4   5  -1  119.09    4.60
  -4   5  -1  111.76    4.67
  -4   5  -1  122.95    4.66
  -4   5  -1  111.68    4.63
  -4   5  -1  116.82    4.61
  -4   5  -1  109.31    4.62
  -4   5  -1  117.70    4.67
  -4   5  -1  117.23    4.64
   5  -5   1    1.63    0.14
   5  -5   1    1.55    0.14
   5  -5   1    1.63    0.17
   5  -5   1    1.57    0.15
   5  -5   1    1.62    0.18
   5  -5   1    1.71    0.16
   5  -5   1    1.43    0.18
   5  -5   1    1.24    0.25
   5  -5   1    1.44    0.19
   5  -5   1    1.50    0.14
   5  -5   1    1.77    0.16
  -5   5  -1    1.71    0.16
  -5   5  -1    1.74    0.22
  -5   5  -1    1.75    0.16
  -5   5  -1    1.53    0.19
  -5   5  -1    1.84    0.18
  -5   5  -1    1.87    0.20
  -5   5  -1    1.57    0.17
   6  -5   1    2.53    0.17
   6  -5   1    2.69    0.15
   6  -5   1    2.65    0.16
   6  -5   1    2.65    0.19
   6  -5   1    2.49    0.16
   6  -5   1    2.53    0.19
   6  -5   1    2.99    0.16
  -6   5  -1    2.66    0.17
  -6   5  -1    2.52    0.22
  -6   5  -1    2.70    0.19
  -6  -5   0    0.41    0.09
   6   5   0    0.44    0.08
   6   5   0    0.48    0.09
   6   5   0    0.53    0.13
   6   5   0    0.43    0.08
  -5  -5   0   15.54    0.69
  -5  -5   0   15.63    0.72
  -5  -5   0   16.33    0.76
  -5  -5   0   15.75    0.74
   5   5   0   16.30    0.72
   5   5   0   16.61    0.72
   5   5   0   16.07    0.76
   5   5   0   14.53    0.73
   5   5   0   15.46    0.70
   5   5   0   16.11    0.74
   5   5   0   14.00    0.90
  -4  -5   0    0.84    0.14
  -4  -5   0    0.79    0.12
   4   5   0    0.47    0.10
   4   5   0    0.63    0.17
  -3  -5   0    0.05    0.04
  -3  -5   0   -0.01    0.04
  -3  -5   0   -0.01    0.04
   3   5   0    0.02    0.08
   3   5   0    0.00    0.16
  -2  -5   0    5.24    0.27
  -2  -5   0    5.20    0.26
  -2  -5   0    4.92    0.26
  -2  -5   0    4.77    0.26
   2   5   0    5.62    0.27
   2   5   0    5.27    0.32
   2   5   0    5.25    0.36
   2   5   0    5.36    0.26
   2   5   0    4.73    0.28
  -1  -5   0    1.23    0.13
  -1  -5   0    1.23    0.09
   1   5   0    1.32    0.10
   1   5   0    1.44    0.10
   1   5   0    1.32    0.08
   1   5   0    1.15    0.14
   0  -5   0    0.02    0.02
   0  -5   0    0.03    0.02
   0   5   0    0.04    0.03
   0   5   0    0.02    0.02
   0   5   0    0.01    0.02
   1  -5   0    1.41    0.10
   1  -5   0    1.48    0.10
   1  -5   0    1.34    0.16
   1  -5   0    1.35    0.10
  -1   5   0    1.27    0.12
  -1   5   0    1.27    0.10
   2  -5   0    5.99    0.38
   2  -5   0    5.74    0.30
   2  -5   0    6.80    0.44
   2  -5   0    4.88    0.29
   2  -5   0    6.45    0.31
   2  -5   0    5.28    0.30
  -2   5   0    5.70    0.27
  -2   5   0    5.05    0.34
  -2   5   0    5.50    0.30
   3  -5   0    0.07    0.10
   3  -5   0    0.05    0.06
   3  -5   0   -0.02    0.09
   3  -5   0    0.01    0.04
   3  -5   0    0.07    0.06
   3  -5   0    0.02    0.05
   3  -5   0    0.15    0.06
   3  -5   0    0.03    0.05
  -3   5   0    0.07    0.03
  -3   5   0    0.02    0.04
  -3   5   0    0.03    0.04
  -3   5   0    0.06    0.05
  -3   5   0    0.02    0.05
   4  -5   0    0.68    0.12
   4  -5   0    0.77    0.21
   4  -5   0    0.68    0.12
   4  -5   0    0.70    0.11
   4  -5   0    0.62    0.25
   4  -5   0    0.68    0.13
  -4   5   0    0.81    0.10
  -4   5   0    1.00    0.16
  -4   5   0    0.83    0.13
  -4   5   0    0.97    0.15
  -4   5   0    0.77    0.10
  -4   5   0    0.77    0.12
   5  -5   0   15.89    0.77
   5  -5   0   15.95    0.73
   5  -5   0   15.75    0.70
   5  -5   0   15.81    0.72
   5  -5   0   16.35    0.72
   5  -5   0   15.97    0.76
   5  -5   0   17.27    0.74
   5  -5   0   15.30    0.71
   5  -5   0   16.51    0.74
   5  -5   0   14.81    0.78
  -5   5   0   16.65    0.75
  -5   5   0   16.07    0.78
  -5   5   0   17.07    0.73
  -5   5   0   17.29    0.77
  -5   5   0   16.48    0.76
  -5   5   0   16.71    0.72
   6  -5   0    0.37    0.10
   6  -5   0    0.48    0.07
   6  -5   0    0.47    0.08
   6  -5   0    0.53    0.07
   6  -5   0    0.43    0.08
   6  -5   0    0.47    0.09
  -6   5   0    0.53    0.09
  -6   5   0    0.54    0.12
  -6   5   0    0.39    0.10
  -6  -5  -1    2.33    0.17
  -6  -5  -1    2.58    0.18
   6   5   1    2.66    0.17
   6   5   1    2.75    0.17
   6   5   1    2.65    0.17
   6   5   1    2.71    0.17
  -5  -5  -1    1.57    0.18
  -5  -5  -1    1.50    0.18
  -5  -5  -1    1.85    0.18
   5   5   1    1.28    0.26
   5   5   1    1.47    0.16
   5   5   1    1.36    0.16
   5   5   1    1.57    0.18
   5   5   1    1.62    0.16
   5   5   1    1.49    0.16
   5   5   1    1.57    0.15
  -4  -5  -1  117.67    4.58
  -4  -5  -1  116.41    4.61
   4   5   1  105.40    4.77
   4   5   1  111.65    4.55
  -3  -5  -1    6.00    0.33
  -3  -5  -1    6.06    0.34
  -3  -5  -1    6.72    0.36
   3   5   1    6.35    0.37
   3   5   1    6.80    0.45
   3   5   1    6.59    0.52
  -2  -5  -1    3.64    0.22
  -2  -5  -1    3.99    0.22
  -2  -5  -1    3.87    0.21
   2   5   1    4.50    0.24
   2   5   1    4.06    0.27
   2   5   1    4.49    0.34
  -1  -5  -1    7.51    0.36
  -1  -5  -1    8.38    0.38
   1   5   1    8.34    0.38
   1   5   1    8.35    0.46
   0  -5  -1   11.65    0.51
   0  -5  -1   11.74    0.50
   0  -5  -1   11.57    0.57
   0  -5  -1   11.24    0.50
   0   5   1   11.37    0.57
   0   5   1   12.04    0.50
   0   5   1   11.08    0.48
   0   5   1   11.18    0.49
   1  -5  -1    0.36    0.11
   1  -5  -1    0.43    0.06
   1  -5  -1    0.40    0.06
   1  -5  -1    0.66    0.07
  -1   5   1    0.45    0.08
  -1   5   1    0.47    0.06
   2  -5  -1  399.13   16.79
   2  -5  -1  430.14   16.82
   2  -5  -1  427.84   16.82
   2  -5  -1  457.64   16.98
  -2   5   1  396.54   16.88
  -2   5   1  428.24   16.80
   3  -5  -1    3.72    0.24
   3  -5  -1    3.50    0.24
   3  -5  -1    3.93    0.33
   3  -5  -1    3.53    0.23
   3  -5  -1    4.27    0.38
   3  -5  -1    3.54    0.22
   3  -5  -1    3.38    0.21
  -3   5   1    2.99    0.17
  -3   5   1    3.56    0.21
  -3   5   1    3.56    0.24
  -3   5   1    4.09    0.23
   4  -5  -1   30.66    1.30
   4  -5  -1   29.75    1.27
   4  -5  -1   29.51    1.25
   4  -5  -1   27.53    1.45
   4  -5  -1   29.24    1.26
  -4   5   1   29.57    1.27
  -4   5   1   29.67    1.22
  -4   5   1   28.00    1.21
  -4   5   1   29.25    1.26
  -4   5   1   29.90    1.28
   5  -5  -1    0.83    0.11
   5  -5  -1    0.63    0.13
   5  -5  -1    0.63    0.09
   5  -5  -1    0.71    0.13
   5  -5  -1    0.84    0.22
   5  -5  -1    0.75    0.11
   5  -5  -1    0.63    0.10
   5  -5  -1    0.63    0.11
   5  -5  -1    0.57    0.09
   5  -5  -1    0.74    0.13
   5  -5  -1    0.81    0.11
  -5   5   1    0.95    0.11
  -5   5   1    1.01    0.14
  -5   5   1    1.18    0.15
  -5   5   1    0.90    0.16
  -5   5   1    0.65    0.12
  -5   5   1    0.86    0.14
   6  -5  -1   31.71    1.31
   6  -5  -1   31.71    1.33
   6  -5  -1   32.72    1.32
   6  -5  -1   31.95    1.33
   6  -5  -1   31.56    1.31
   6  -5  -1   32.27    1.33
  -6   5   1   32.26    1.34
  -6   5   1   30.89    1.32
  -6  -5  -2    0.38    0.07
  -6  -5  -2    0.28    0.08
   6   5   2    0.39    0.08
   6   5   2    0.44    0.09
  -5  -5  -2    2.10    0.17
  -5  -5  -2    1.85    0.20
   5   5   2    2.06    0.17
   5   5   2    1.78    0.16
   5   5   2    1.76    0.17
   5   5   2    1.86    0.16
   5   5   2    1.77    0.20
  -4  -5  -2    0.55    0.11
  -4  -5  -2    0.44    0.11
  -4  -5  -2    0.40    0.10
   4   5   2    0.52    0.19
   4   5   2    0.37    0.09
   4   5   2    0.32    0.20
  -3  -5  -2   38.42    1.61
  -3  -5  -2   37.28    1.58
   3   5   2   34.98    1.63
   3   5   2   39.80    1.75
   3   5   2   38.27    1.89
  -2  -5  -2    0.91    0.11
  -2  -5  -2    0.90    0.10
  -2  -5  -2    0.92    0.09
   2   5   2    1.01    0.11
   2   5   2    0.90    0.17
   2   5   2    0.91    0.15
  -1  -5  -2   44.92    1.89
  -1  -5  -2   47.85    1.91
   1   5   2   46.80    2.02
   1   5   2   45.78    1.90
   1   5   2   47.46    1.91
   0  -5  -2   51.20    2.22
   0  -5  -2   55.67    2.32
   0  -5  -2   57.41    2.24
   0   5   2   54.83    2.32
   0   5   2   56.34    2.24
   1  -5  -2   26.68    1.07
   1  -5  -2   24.58    1.05
   1  -5  -2   26.23    1.07
   1  -5  -2   24.12    1.05
   1  -5  -2   26.00    1.16
  -1   5   2   27.17    1.09
  -1   5   2   25.54    1.05
  -1   5   2   24.53    1.07
   2  -5  -2    1.70    0.13
   2  -5  -2    1.74    0.13
   2  -5  -2    1.78    0.22
   2  -5  -2    1.65    0.16
   2  -5  -2    1.69    0.13
  -2   5   2    1.66    0.16
   3  -5  -2   45.65    1.91
   3  -5  -2   45.82    1.88
   3  -5  -2   44.27    1.87
   3  -5  -2   47.01    2.02
   3  -5  -2   44.31    1.86
   3  -5  -2   45.00    1.89
  -3   5   2   46.05    1.88
   4  -5  -2   24.84    1.12
   4  -5  -2   25.87    1.09
   4  -5  -2   26.22    1.10
   4  -5  -2   26.15    1.08
   4  -5  -2   24.29    1.26
  -4   5   2   24.44    1.04
  -4   5   2   24.99    1.09
  -4   5   2   23.50    1.03
  -4   5   2   24.81    1.09
  -4   5   2   24.68    1.11
  -4   5   2   25.31    1.09
   5  -5  -2    8.49    0.44
   5  -5  -2    8.78    0.43
   5  -5  -2    9.68    0.51
   5  -5  -2    8.89    0.46
   5  -5  -2    9.14    0.42
   5  -5  -2    9.41    0.43
   5  -5  -2    7.49    0.59
   5  -5  -2    9.45    0.48
   5  -5  -2    9.06    0.46
   5  -5  -2    8.75    0.44
   5  -5  -2    8.99    0.44
  -5   5   2    8.77    0.48
  -5   5   2    9.23    0.42
  -5   5   2    8.18    0.52
  -5   5   2    9.50    0.43
  -5   5   2    9.38    0.49
  -5   5   2    9.29    0.47
   6  -5  -2    0.08    0.05
   6  -5  -2    0.10    0.07
   6  -5  -2    0.10    0.06
   6  -5  -2    0.02    0.06
   6  -5  -2    0.11    0.06
   6  -5  -2    0.09    0.06
  -6   5   2    0.07    0.07
  -6  -5  -3    2.81    0.16
   6   5   3    3.10    0.17
  -5  -5  -3    4.42    0.29
  -5  -5  -3    4.09    0.26
  -5  -5  -3    4.56    0.27
   5   5   3    4.71    0.27
   5   5   3    4.06    0.24
   5   5   3    4.40    0.25
   5   5   3    4.28    0.26
  -4  -5  -3    0.45    0.10
  -4  -5  -3    0.37    0.10
  -4  -5  -3    0.43    0.11
  -4  -5  -3    0.47    0.13
   4   5   3    0.24    0.07
   4   5   3    0.37    0.09
   4   5   3    0.36    0.17
   4   5   3    0.30    0.10
   4   5   3    0.41    0.11
  -3  -5  -3   19.77    0.86
  -3  -5  -3   19.96    0.89
   3   5   3   20.31    1.02
   3   5   3   18.51    1.15
   3   5   3   18.16    0.92
  -2  -5  -3    3.47    0.20
  -2  -5  -3    3.30    0.20
  -2  -5  -3    3.62    0.22
   2   5   3    3.57    0.24
   2   5   3    3.61    0.36
   2   5   3    3.51    0.27
  -1  -5  -3    2.27    0.14
  -1  -5  -3    2.82    0.14
  -1  -5  -3    2.58    0.16
  -1  -5  -3    2.08    0.16
  -1  -5  -3    2.11    0.15
   1   5   3    2.35    0.24
   1   5   3    2.45    0.17
   1   5   3    2.18    0.16
   1   5   3    2.05    0.21
   0  -5  -3   87.16    3.53
   0  -5  -3   84.44    3.51
   0   5   3   87.07    3.63
   0   5   3   92.36    3.50
   0   5   3   85.83    3.52
   1  -5  -3   50.22    1.99
   1  -5  -3   47.25    1.98
   1  -5  -3   50.26    2.09
   1  -5  -3   50.26    2.00
  -1   5   3   47.20    2.09
  -1   5   3   48.24    2.00
   2  -5  -3   90.12    3.78
   2  -5  -3   95.49    3.71
   2  -5  -3   94.63    3.73
   2  -5  -3   91.95    3.70
   2  -5  -3   90.69    3.70
   2  -5  -3   88.91    3.71
   2  -5  -3   98.47    3.74
   2  -5  -3   92.67    3.72
  -2   5   3   96.16    3.73
  -2   5   3   85.86    3.79
   3  -5  -3    0.21    0.07
   3  -5  -3    0.06    0.05
   3  -5  -3    0.16    0.07
   3  -5  -3    0.14    0.07
   3  -5  -3    0.10    0.06
  -3   5   3    0.16    0.06
   4  -5  -3   41.31    1.72
   4  -5  -3   41.22    1.74
   4  -5  -3   43.82    1.71
   4  -5  -3   41.59    1.72
   4  -5  -3   41.36    1.69
  -4   5   3   40.85    1.73
  -4   5   3   41.76    1.65
  -4   5   3   37.52    1.69
  -4   5   3   36.54    1.69
   5  -5  -3    8.51    0.40
   5  -5  -3    8.81    0.42
   5  -5  -3    8.87    0.46
   5  -5  -3    8.77    0.45
   5  -5  -3    8.51    0.41
   5  -5  -3    9.10    0.49
   5  -5  -3    8.03    0.42
   5  -5  -3    8.31    0.41
   5  -5  -3    7.70    0.43
   5  -5  -3    8.85    0.44
  -5   5   3    8.87    0.40
  -5   5   3    8.74    0.41
  -5   5   3    8.43    0.46
  -5   5   3    8.71    0.46
   6  -5  -3    3.89    0.21
   6  -5  -3    3.85    0.23
   6  -5  -3    4.14    0.24
   6  -5  -3    4.10    0.21
   6  -5  -3    4.29    0.22
  -6   5   3    3.88    0.24
  -5  -5  -4    0.53    0.09
  -5  -5  -4    0.42    0.09
  -5  -5  -4    0.32    0.09
   5   5   4    0.47    0.08
   5   5   4    0.46    0.08
   5   5   4    0.45    0.07
  -4  -5  -4   -0.02    0.07
  -4  -5  -4   -0.08    0.08
  -4  -5  -4    0.01    0.07
   4   5   4   -0.04    0.08
   4   5   4   -0.03    0.06
   4   5   4    0.01    0.06
   4   5   4    0.01    0.05
  -3  -5  -4    0.66    0.11
  -3  -5  -4    0.63    0.10
  -3  -5  -4    0.53    0.11
   3   5   4    0.45    0.20
   3   5   4    0.54    0.09
  -2  -5  -4    1.46    0.14
  -2  -5  -4    1.04    0.12
   2   5   4    1.27    0.20
   2   5   4    1.27    0.24
   2   5   4    1.19    0.14
  -1  -5  -4   83.94    3.49
  -1  -5  -4   85.21    3.43
  -1  -5  -4   83.65    3.44
  -1  -5  -4   85.81    3.45
  -1  -5  -4   84.85    3.46
  -1  -5  -4   82.72    3.42
   1   5   4   83.97    3.47
   1   5   4   85.74    3.65
   1   5   4   84.89    3.44
   1   5   4   90.52    3.46
   1   5   4   86.86    3.50
   1   5   4   85.73    3.47
   1   5   4   83.87    3.46
   0  -5  -4   -0.03    0.05
   0  -5  -4    0.01    0.03
   0  -5  -4    0.02    0.07
   0  -5  -4    0.00    0.04
   0  -5  -4    0.11    0.04
   0  -5  -4    0.06    0.03
   0   5   4    0.01    0.03
   0   5   4    0.00    0.04
   0   5   4    0.00    0.05
   0   5   4    0.18    0.05
   0   5   4    0.02    0.04
   0   5   4    0.01    0.03
   1  -5  -4  178.36    7.15
   1  -5  -4  178.46    7.17
   1  -5  -4  185.13    7.19
   1  -5  -4  177.27    7.15
   1  -5  -4  177.56    7.17
   1  -5  -4  176.73    7.20
  -1   5   4  183.14    7.19
   2  -5  -4    1.43    0.13
   2  -5  -4    1.63    0.22
   2  -5  -4    1.48    0.14
   2  -5  -4    1.66    0.13
   2  -5  -4    1.64    0.14
   2  -5  -4    1.55    0.13
   2  -5  -4    1.60    0.14
  -2   5   4    1.54    0.13
   3  -5  -4  128.44    5.55
   3  -5  -4  141.96    5.53
   3  -5  -4  132.85    5.53
   3  -5  -4  144.39    5.52
   3  -5  -4  136.54    5.51
   3  -5  -4  140.87    5.52
   4  -5  -4    3.79    0.26
   4  -5  -4    4.01    0.23
   4  -5  -4    3.93    0.26
   4  -5  -4    4.25    0.25
   4  -5  -4    3.63    0.24
   4  -5  -4    4.04    0.24
  -4   5   4    3.11    0.23
  -4   5   4    3.94    0.27
  -4   5   4    3.69    0.19
   5  -5  -4    8.88    0.43
   5  -5  -4    7.55    0.42
   5  -5  -4    8.79    0.47
   5  -5  -4    8.68    0.41
   5  -5  -4    8.40    0.44
   5  -5  -4    8.44    0.43
   5  -5  -4    8.76    0.40
   5  -5  -4    8.41    0.39
   5  -5  -4    8.48    0.41
   5  -5  -4    8.12    0.42
  -5   5   4    8.41    0.44
  -5   5   4    7.21    0.43
  -5   5   4    8.39    0.39
  -5   5   4    7.88    0.40
   6  -5  -4    5.58    0.30
   6  -5  -4    6.15    0.29
   6  -5  -4    5.97    0.29
   6  -5  -4    5.63    0.29
   6  -5  -4    5.93    0.29
   6  -5  -4    5.66    0.48
  -6   5   4    5.64    0.30
  -5  -5  -5   16.13    0.67
  -5  -5  -5   14.76    0.69
  -5  -5  -5   13.82    0.67
   5   5   5   16.07    0.66
   5   5   5   15.44    0.68
   5   5   5   16.46    0.68
  -4  -5  -5    1.12    0.14
  -4  -5  -5    0.96    0.13
  -4  -5  -5    0.95    0.14
   4   5   5    0.90    0.11
   4   5   5    0.83    0.11
   4   5   5    0.86    0.12
  -3  -5  -5    0.74    0.12
  -3  -5  -5    0.61    0.11
  -3  -5  -5    0.55    0.13
   3   5   5    0.56    0.23
   3   5   5    0.71    0.10
  -2  -5  -5    5.35    0.32
  -2  -5  -5    5.43    0.30
   2   5   5    4.87    0.51
   2   5   5    6.01    0.38
   2   5   5    4.99    0.35
  -1  -5  -5   89.02    3.64
  -1  -5  -5   90.24    3.62
  -1  -5  -5   89.61    3.66
  -1  -5  -5   88.60    3.61
  -1  -5  -5   90.18    3.65
  -1  -5  -5   89.62    3.70
  -1  -5  -5   90.13    3.61
   1   5   5   92.44    3.67
   1   5   5   86.51    3.65
   1   5   5   85.73    3.68
   1   5   5   94.52    3.67
   1   5   5   92.41    3.63
   1   5   5   84.40    3.61
   1   5   5   89.12    3.91
   1   5   5   92.20    3.72
   1   5   5   91.01    3.67
   0  -5  -5    0.58    0.09
   0  -5  -5    0.46    0.07
   0  -5  -5    0.39    0.11
   0  -5  -5    0.41    0.06
   0  -5  -5    0.36    0.07
   0  -5  -5    0.37    0.09
   0  -5  -5    0.53    0.09
   0   5   5    0.44    0.10
   0   5   5    0.36    0.08
   0   5   5    0.39    0.08
   0   5   5    0.36    0.08
   0   5   5    0.29    0.06
   0   5   5    0.75    0.11
   0   5   5    0.46    0.14
   1  -5  -5    0.22    0.06
   1  -5  -5    0.17    0.06
   1  -5  -5    0.21    0.07
   1  -5  -5    0.22    0.10
   1  -5  -5    0.15    0.06
   1  -5  -5    0.24    0.08
   1  -5  -5    0.12    0.07
  -1   5   5    0.16    0.04
  -1   5   5    0.17    0.05
  -1   5   5    0.14    0.04
  -1   5   5    0.20    0.07
  -1   5   5    0.23    0.08
   2  -5  -5    0.15    0.06
   2  -5  -5    0.11    0.05
   2  -5  -5    0.07    0.05
   2  -5  -5    0.10    0.08
   2  -5  -5    0.17    0.06
   2  -5  -5    0.03    0.05
  -2   5   5    0.06    0.05
   3  -5  -5   20.72    0.88
   3  -5  -5   19.54    0.89
   3  -5  -5   20.98    0.91
   3  -5  -5   20.52    0.87
   3  -5  -5   20.00    0.88
   4  -5  -5    6.04    0.31
   4  -5  -5    4.64    0.32
   4  -5  -5    5.19    0.30
   4  -5  -5    5.37    0.31
   4  -5  -5    5.85    0.31
   4  -5  -5    4.93    0.32
   4  -5  -5    5.06    0.29
  -4   5   5    5.58    0.31
  -4   5   5    5.23    0.34
  -4   5   5    5.30    0.26
   5  -5  -5    0.35    0.08
   5  -5  -5    0.47    0.10
   5  -5  -5    0.28    0.08
   5  -5  -5    0.39    0.09
   5  -5  -5    0.24    0.11
   5  -5  -5    0.28    0.09
   5  -5  -5    0.35    0.10
   5  -5  -5    0.33    0.07
   5  -5  -5    0.32    0.08
   5  -5  -5    0.28    0.11
  -5   5   5    0.29    0.10
  -5   5   5    0.35    0.08
   6  -5  -5    0.95    0.10
   6  -5  -5    0.79    0.13
   6  -5  -5    1.00    0.10
   6  -5  -5    0.90    0.16
   6  -5  -5    0.95    0.10
   6  -5  -5    0.87    0.11
  -6   5   5    0.86    0.11
  -5  -5  -6    4.35    0.24
   5   5   6    4.32    0.23
  -4  -5  -6    1.04    0.13
  -4  -5  -6    0.90    0.12
  -4  -5  -6    0.99    0.14
   4   5   6    1.26    0.12
   4   5   6    1.27    0.14
   4   5   6    1.12    0.12
  -3  -5  -6   10.18    0.50
  -3  -5  -6   10.65    0.51
  -3  -5  -6   10.92    0.52
  -3  -5  -6   11.25    0.55
   3   5   6   10.32    0.51
   3   5   6   10.23    0.50
   3   5   6   10.27    0.52
  -2  -5  -6    5.13    0.30
  -2  -5  -6    5.25    0.33
  -2  -5  -6    5.33    0.30
   2   5   6    6.20    0.40
   2   5   6    4.16    0.51
   2   5   6    5.04    0.29
  -1  -5  -6    0.15    0.06
  -1  -5  -6    0.13    0.07
  -1  -5  -6    0.16    0.06
  -1  -5  -6    0.23    0.07
  -1  -5  -6    0.23    0.08
   1   5   6    0.02    0.09
   1   5   6    0.15    0.06
   1   5   6    0.19    0.09
   1   5   6    0.23    0.09
   1   5   6    0.12    0.06
   1   5   6    0.13    0.13
   0  -5  -6    5.37    0.35
   0  -5  -6    5.24    0.30
   0  -5  -6    4.91    0.28
   0  -5  -6    4.88    0.27
   0  -5  -6    4.92    0.31
   0  -5  -6    5.29    0.28
   0  -5  -6    5.14    0.30
   0   5   6    5.22    0.35
   0   5   6    5.05    0.32
   0   5   6    4.98    0.27
   0   5   6    5.68    0.33
   0   5   6    5.14    0.28
   0   5   6    5.28    0.30
   0   5   6    5.96    0.32
   1  -5  -6  231.07    9.06
   1  -5  -6  226.56    9.06
   1  -5  -6  229.02    9.03
   1  -5  -6  228.08    9.11
   1  -5  -6  224.12    9.02
   1  -5  -6  224.86    9.08
   1  -5  -6  222.11    9.03
  -1   5   6  214.97    9.01
  -1   5   6  225.74    9.07
  -1   5   6  221.86    9.11
  -1   5   6  239.15    9.05
  -1   5   6  230.20    9.10
  -1   5   6  226.14    9.02
  -1   5   6  225.56    9.04
   2  -5  -6    2.72    0.17
   2  -5  -6    2.63    0.18
   2  -5  -6    2.48    0.20
   2  -5  -6    2.66    0.19
   2  -5  -6    2.64    0.18
  -2   5   6    2.42    0.16
  -2   5   6    2.71    0.17
  -2   5   6    2.74    0.22
  -2   5   6    2.62    0.20
  -2   5   6    2.48    0.15
   3  -5  -6    4.67    0.28
   3  -5  -6    5.58    0.29
   3  -5  -6    5.22    0.31
   3  -5  -6    5.55    0.29
   3  -5  -6    5.49    0.30
   3  -5  -6    5.60    0.28
  -3   5   6    4.08    0.26
  -3   5   6    5.32    0.26
   4  -5  -6    0.02    0.06
   4  -5  -6    0.05    0.08
   4  -5  -6    0.00    0.06
   4  -5  -6    0.02    0.07
   4  -5  -6    0.07    0.07
  -4   5   6    0.05    0.06
  -4   5   6   -0.01    0.05
  -4   5   6    0.06    0.08
   5  -5  -6   15.58    0.74
   5  -5  -6   17.37    0.73
   5  -5  -6   16.86    0.74
   5  -5  -6   16.96    0.71
   5  -5  -6   16.35    0.76
  -5   5   6   16.57    0.72
  -5   5   6   15.75    0.72
   6  -5  -6    0.11    0.07
   6  -5  -6    0.10    0.07
   6  -5  -6    0.00    0.07
   6  -5  -6   -0.01    0.07
   6  -5  -6    0.00    0.06
  -4  -5  -7    0.60    0.13
  -4  -5  -7    0.60    0.09
   4   5   7    0.67    0.08
   4   5   7    0.63    0.12
  -3  -5  -7    5.13    0.31
  -3  -5  -7    4.57    0.28
  -3  -5  -7    4.96    0.28
  -3  -5  -7    5.63    0.32
   3   5   7    5.06    0.29
   3   5   7    5.29    0.29
   3   5   7    5.35    0.30
  -2  -5  -7   37.32    1.61
  -2  -5  -7   39.24    1.62
  -2  -5  -7   41.19    1.65
  -2  -5  -7   36.77    1.61
  -2  -5  -7   37.02    1.62
  -2  -5  -7   37.06    1.60
   2   5   7   36.33    1.60
   2   5   7   39.16    1.64
   2   5   7   39.62    1.62
   2   5   7   41.76    1.76
  -1  -5  -7    6.67    0.36
  -1  -5  -7    6.80    0.39
  -1  -5  -7    6.70    0.38
  -1  -5  -7    6.41    0.35
  -1  -5  -7    6.62    0.35
   1   5   7    6.97    0.47
   1   5   7    6.46    0.35
   1   5   7    7.01    0.40
   1   5   7    6.45    0.38
   0  -5  -7   14.45    0.66
   0  -5  -7   13.18    0.61
   0  -5  -7   13.46    0.63
   0  -5  -7   14.19    0.66
   0  -5  -7   13.96    0.66
   0  -5  -7   13.31    0.62
   0   5   7   12.59    0.70
   0   5   7   13.36    0.73
   0   5   7   13.53    0.67
   0   5   7   14.52    0.68
   0   5   7   14.14    0.63
   0   5   7   13.45    0.67
   0   5   7   13.65    0.63
   1  -5  -7    3.50    0.23
   1  -5  -7    2.44    0.24
   1  -5  -7    2.79    0.19
   1  -5  -7    2.68    0.18
   1  -5  -7    2.79    0.21
   1  -5  -7    2.59    0.19
  -1   5   7    2.80    0.23
  -1   5   7    2.34    0.17
  -1   5   7    2.47    0.18
  -1   5   7    2.89    0.21
  -1   5   7    2.32    0.26
  -1   5   7    2.74    0.20
  -1   5   7    2.43    0.25
   2  -5  -7   53.13    2.17
   2  -5  -7   53.34    2.21
   2  -5  -7   52.88    2.18
   2  -5  -7   55.05    2.20
   2  -5  -7   52.63    2.18
   2  -5  -7   54.62    2.17
  -2   5   7   53.02    2.21
  -2   5   7   52.70    2.16
  -2   5   7   49.16    2.19
  -2   5   7   53.35    2.17
  -2   5   7   50.76    2.18
   3  -5  -7    0.27    0.09
   3  -5  -7    0.28    0.08
   3  -5  -7    0.26    0.08
  -3   5   7    0.17    0.07
  -3   5   7    0.28    0.10
  -3   5   7    0.19    0.08
  -3   5   7    0.15    0.07
   4  -5  -7    0.68    0.12
   4  -5  -7    0.31    0.09
   4  -5  -7    0.40    0.09
   4  -5  -7    0.49    0.10
   4  -5  -7    0.41    0.10
   4  -5  -7    0.36    0.09
   4  -5  -7    0.30    0.10
   4  -5  -7    0.48    0.10
  -4   5   7    0.42    0.08
  -4   5   7    0.46    0.12
  -4   5   7    0.44    0.09
   5  -5  -7    2.66    0.20
   5  -5  -7    2.81    0.22
   5  -5  -7    2.74    0.19
   5  -5  -7    2.66    0.18
   5  -5  -7    2.93    0.17
   5  -5  -7    2.90    0.22
  -5   5   7    2.67    0.18
   6  -5  -7    0.12    0.07
   6  -5  -7    0.17    0.08
   6  -5  -7    0.13    0.08
   6  -5  -7    0.21    0.09
  -4  -5  -8    0.52    0.08
  -3  -5  -8    1.01    0.15
  -3  -5  -8    0.90    0.12
  -3  -5  -8    1.45    0.13
   3   5   8    1.03    0.12
   3   5   8    1.23    0.14
   3   5   8    1.49    0.13
  -2  -5  -8    1.25    0.13
  -2  -5  -8    0.99    0.12
  -2  -5  -8    0.93    0.13
   2   5   8    1.15    0.13
   2   5   8    0.86    0.11
   2   5   8    1.02    0.13
  -1  -5  -8   36.09    1.56
  -1  -5  -8   38.99    1.58
  -1  -5  -8   36.53    1.58
  -1  -5  -8   37.08    1.56
  -1  -5  -8   35.21    1.55
  -1  -5  -8   35.40    1.55
  -1  -5  -8   38.31    1.56
   1   5   8   39.07    1.57
   1   5   8   37.82    1.60
   1   5   8   39.05    1.72
   1   5   8   35.87    1.56
   1   5   8   35.62    1.55
   0  -5  -8    3.59    0.27
   0  -5  -8    3.66    0.24
   0  -5  -8    3.45    0.23
   0  -5  -8    3.75    0.24
   0  -5  -8    3.97    0.28
   0  -5  -8    3.46    0.22
   0   5   8    3.58    0.26
   0   5   8    3.72    0.24
   0   5   8    3.70    0.28
   0   5   8    4.00    0.29
   0   5   8    3.49    0.24
   0   5   8    3.54    0.32
   0   5   8    3.52    0.26
   0   5   8    3.77    0.28
   1  -5  -8   -0.04    0.06
   1  -5  -8   -0.01    0.05
   1  -5  -8    0.02    0.06
   1  -5  -8    0.10    0.06
   1  -5  -8    0.16    0.09
   1  -5  -8    0.16    0.08
  -1   5   8    0.06    0.06
  -1   5   8    0.03    0.09
  -1   5   8    0.00    0.06
  -1   5   8    0.06    0.07
  -1   5   8    0.01    0.07
  -1   5   8    0.02    0.07
  -1   5   8    0.06    0.06
   2  -5  -8    1.37    0.15
   2  -5  -8    1.14    0.16
   2  -5  -8    1.31    0.15
   2  -5  -8    1.19    0.14
   2  -5  -8    1.21    0.17
   2  -5  -8    1.24    0.15
  -2   5   8    1.42    0.16
  -2   5   8    1.46    0.16
  -2   5   8    1.31    0.18
  -2   5   8    1.44    0.15
  -2   5   8    1.47    0.15
   3  -5  -8   42.35    1.76
   3  -5  -8   37.95    1.70
   3  -5  -8   41.20    1.71
   3  -5  -8   39.42    1.73
   3  -5  -8   41.55    1.71
   3  -5  -8   41.86    1.77
   3  -5  -8   39.22    1.69
   3  -5  -8   39.68    1.70
   3  -5  -8   42.89    1.74
  -3   5   8   40.99    1.72
  -3   5   8   40.64    1.72
  -3   5   8   39.51    1.69
  -3   5   8   40.93    1.71
  -3   5   8   40.09    1.70
   4  -5  -8    1.17    0.13
   4  -5  -8    1.30    0.15
   4  -5  -8    1.34    0.17
   4  -5  -8    1.36    0.16
   4  -5  -8    1.37    0.17
   4  -5  -8    1.49    0.16
  -4   5   8    1.34    0.14
  -4   5   8    1.31    0.14
   5  -5  -8    2.15    0.17
   5  -5  -8    2.13    0.16
   5  -5  -8    2.16    0.20
   5  -5  -8    2.15    0.17
   5  -5  -8    1.97    0.18
  -3  -5  -9    0.60    0.07
  -3  -5  -9    0.44    0.08
   3   5   9    0.61    0.07
   3   5   9    0.58    0.09
  -2  -5  -9    0.85    0.10
  -2  -5  -9    0.74    0.10
   2   5   9    0.82    0.11
   2   5   9    0.79    0.10
   2   5   9    0.70    0.11
  -1  -5  -9    0.39    0.08
  -1  -5  -9    0.34    0.09
  -1  -5  -9    0.34    0.08
  -1  -5  -9    0.36    0.08
  -1  -5  -9    0.47    0.09
   1   5   9    0.52    0.10
   1   5   9    0.48    0.09
   1   5   9    0.39    0.08
   1   5   9    0.28    0.09
   0  -5  -9   39.46    1.61
   0  -5  -9   35.37    1.61
   0  -5  -9   35.50    1.58
   0  -5  -9   39.27    1.59
   0  -5  -9   37.46    1.59
   0  -5  -9   37.23    1.59
   0  -5  -9   38.95    1.59
   0  -5  -9   35.27    1.58
   0  -5  -9   38.82    1.61
   0   5   9   35.97    1.59
   0   5   9   37.15    1.60
   0   5   9   39.00    1.65
   0   5   9   36.36    1.72
   0   5   9   40.11    1.60
   0   5   9   39.90    1.63
   0   5   9   38.41    1.60
   1  -5  -9    0.63    0.11
   1  -5  -9    1.07    0.14
   1  -5  -9    0.64    0.11
   1  -5  -9    0.76    0.13
   1  -5  -9    0.92    0.14
   1  -5  -9    0.83    0.15
   1  -5  -9    0.71    0.11
   1  -5  -9    0.77    0.13
   1  -5  -9    0.69    0.11
   1  -5  -9    0.68    0.11
   1  -5  -9    0.80    0.13
   1  -5  -9    0.67    0.11
  -1   5   9    0.62    0.14
  -1   5   9    0.61    0.15
  -1   5   9    0.71    0.14
  -1   5   9    0.67    0.15
  -1   5   9    0.51    0.12
  -1   5   9    0.68    0.12
  -1   5   9    0.72    0.14
   2  -5  -9    0.06    0.06
   2  -5  -9   -0.10    0.08
   2  -5  -9    0.18    0.09
   2  -5  -9    0.14    0.07
   2  -5  -9   -0.07    0.07
   2  -5  -9    0.07    0.08
   2  -5  -9    0.06    0.08
   2  -5  -9    0.18    0.09
   2  -5  -9    0.08    0.06
   2  -5  -9    0.03    0.07
  -2   5   9    0.09    0.08
  -2   5   9    0.06    0.09
  -2   5   9    0.01    0.09
  -2   5   9    0.15    0.08
  -2   5   9    0.05    0.11
   3  -5  -9    0.41    0.11
   3  -5  -9    0.49    0.10
   3  -5  -9    0.46    0.10
   3  -5  -9    0.56    0.12
   3  -5  -9    0.59    0.12
   3  -5  -9    0.44    0.10
  -3   5   9    0.30    0.11
  -3   5   9    0.39    0.12
  -3   5   9    0.50    0.10
  -3   5   9    0.39    0.10
   4  -5  -9    0.25    0.09
   4  -5  -9    0.35    0.11
   4  -5  -9    0.36    0.08
   4  -5  -9    0.43    0.10
   4  -5  -9    0.55    0.08
   4  -5  -9    0.41    0.08
  -4   5   9    0.41    0.08
  -4   5   9    0.48    0.12
   5  -5  -9    0.05    0.07
   5  -5  -9    0.00    0.05
   5  -5  -9    0.04    0.07
   5  -5  -9    0.01    0.16
   5  -5  -9    0.02    0.08
  -2  -5 -10    4.32    0.23
  -2  -5 -10    3.35    0.20
   2   5  10    3.41    0.22
   2   5  10    4.28    0.27
   2   5  10    4.23    0.21
  -1  -5 -10    0.30    0.07
  -1  -5 -10    0.33    0.07
  -1  -5 -10    0.28    0.07
  -1  -5 -10    0.33    0.07
   1   5  10    0.26    0.07
   1   5  10    0.34    0.10
   1   5  10    0.37    0.08
   0  -5 -10    5.16    0.29
   0  -5 -10    5.57    0.30
   0  -5 -10    5.03    0.31
   0  -5 -10    5.58    0.30
   0  -5 -10    5.19    0.29
   0  -5 -10    4.92    0.30
   0  -5 -10    5.01    0.30
   0   5  10    5.99    0.31
   0   5  10    5.07    0.34
   0   5  10    5.66    0.31
   0   5  10    4.84    0.29
   1  -5 -10    4.12    0.28
   1  -5 -10    3.90    0.26
   1  -5 -10    4.26    0.27
   1  -5 -10    4.14    0.26
   1  -5 -10    4.39    0.25
   1  -5 -10    4.05    0.26
   1  -5 -10    4.08    0.25
   1  -5 -10    4.18    0.27
  -1   5  10    4.39    0.28
  -1   5  10    4.31    0.31
  -1   5  10    3.90    0.30
  -1   5  10    4.08    0.27
   2  -5 -10    0.74    0.11
   2  -5 -10    0.76    0.13
   2  -5 -10    0.86    0.13
   2  -5 -10    0.63    0.11
   2  -5 -10    0.63    0.11
   2  -5 -10    0.73    0.12
   2  -5 -10    0.72    0.12
  -2   5  10    0.72    0.14
  -2   5  10    0.65    0.14
  -2   5  10    0.59    0.19
   3  -5 -10    0.61    0.10
   3  -5 -10    0.59    0.12
   3  -5 -10    0.46    0.10
   3  -5 -10    0.44    0.09
   3  -5 -10    0.56    0.10
   3  -5 -10    0.62    0.14
   3  -5 -10    0.57    0.11
  -3   5  10    0.38    0.08
  -3   5  10    0.27    0.12
   4  -5 -10    2.47    0.19
   4  -5 -10    2.64    0.18
   4  -5 -10    2.80    0.22
   4  -5 -10    2.29    0.20
   4  -5 -10    2.71    0.19
   4  -5 -10    2.32    0.17
   4  -5 -10    2.66    0.20
  -4   5  10    2.51    0.20
  -1  -5 -11    0.00    0.04
  -1  -5 -11    0.06    0.07
  -1  -5 -11   -0.03    0.03
   1   5  11    0.06    0.05
   1   5  11    0.04    0.06
   0  -5 -11    1.09    0.11
   0  -5 -11    1.34    0.13
   0  -5 -11    1.33    0.11
   0  -5 -11    1.31    0.12
   0  -5 -11    1.37    0.12
   0   5  11    1.23    0.13
   0   5  11    1.36    0.12
   0   5  11    1.22    0.14
   1  -5 -11    5.35    0.29
   1  -5 -11    4.86    0.29
   1  -5 -11    5.80    0.29
   1  -5 -11    5.18    0.29
   1  -5 -11    5.63    0.28
   1  -5 -11    5.46    0.29
   1  -5 -11    5.64    0.28
   1  -5 -11    5.17    0.29
  -1   5  11    5.35    0.29
  -1   5  11    5.61    0.32
  -1   5  11    6.04    0.31
  -1   5  11    5.39    0.36
   2  -5 -11    0.77    0.11
   2  -5 -11    0.69    0.10
   2  -5 -11    0.76    0.10
   2  -5 -11    0.62    0.10
   2  -5 -11    0.63    0.10
   2  -5 -11    0.69    0.10
   2  -5 -11    0.67    0.10
  -2   5  11    0.66    0.11
  -2   5  11    0.73    0.13
  -2   5  11    0.64    0.16
   3  -5 -11    0.37    0.08
   3  -5 -11    0.30    0.06
   3  -5 -11    0.31    0.09
   3  -5 -11    0.31    0.12
   3  -5 -11    0.34    0.08
   3  -5 -11    0.25    0.08
   3  -5 -11    0.32    0.07
  -3   5  11    0.33    0.08
  -3   5  11    0.38    0.10
   4  -5 -11    1.55    0.14
   4  -5 -11    1.58    0.14
   4  -5 -11    1.94    0.16
   4  -5 -11    1.59    0.12
   1  -5 -12    2.86    0.17
   1  -5 -12    3.29    0.17
   1  -5 -12    3.40    0.19
   1  -5 -12    3.27    0.19
  -1   5  12    3.22    0.19
  -1   5  12    3.48    0.17
   2  -5 -12    8.93    0.41
   2  -5 -12   10.31    0.41
   2  -5 -12    8.87    0.40
   2  -5 -12    8.18    0.41
   2  -5 -12    9.09    0.41
   2  -5 -12    8.93    0.41
  -2   5  12   10.40    0.41
  -2   5  12    8.72    0.41
   2   6 -12    0.23    0.07
  -1  -6  12    0.77    0.09
  -3  -6  11    6.31    0.28
  -3  -6  11    6.23    0.30
   3   6 -11    6.28    0.29
   3   6 -11    5.61    0.31
   3   6 -11    5.58    0.31
  -2  -6  11    2.98    0.17
  -2  -6  11    2.72    0.18
   2   6 -11    2.96    0.20
   2   6 -11    2.82    0.17
   2   6 -11    2.65    0.20
  -1  -6  11    0.69    0.08
  -1  -6  11    0.51    0.09
   1   6 -11    0.54    0.09
   1   6 -11    0.72    0.10
   0  -6  11    0.93    0.13
   0  -6  11    0.70    0.09
   0   6 -11    0.67    0.09
   0   6 -11    0.50    0.08
   1  -6  11    0.54    0.08
  -1   6 -11    0.31    0.06
  -4  -6  10    8.43    0.37
  -4  -6  10    7.82    0.38
   4   6 -10    7.94    0.37
   4   6 -10    7.80    0.39
   4   6 -10    8.11    0.41
   4   6 -10    8.25    0.37
  -3  -6  10    1.33    0.13
  -3  -6  10    1.22    0.12
   3   6 -10    1.22    0.15
   3   6 -10    1.22    0.12
   3   6 -10    1.20    0.14
   3   6 -10    1.20    0.12
   3   6 -10    1.24    0.14
  -2  -6  10    2.90    0.19
  -2  -6  10    2.89    0.20
   2   6 -10    3.36    0.19
   2   6 -10    3.19    0.22
   2   6 -10    3.02    0.20
   2   6 -10    2.85    0.23
  -1  -6  10    1.95    0.15
  -1  -6  10    2.01    0.16
   1   6 -10    1.74    0.15
   1   6 -10    1.89    0.15
   1   6 -10    1.87    0.18
   0  -6  10    5.86    0.30
   0  -6  10    6.28    0.31
   0   6 -10    6.07    0.31
   0   6 -10    5.85    0.33
   1  -6  10    2.30    0.16
  -1   6 -10    2.15    0.16
  -1   6 -10    1.79    0.16
   2  -6  10    0.15    0.06
  -2   6 -10    0.15    0.08
  -2   6 -10    0.13    0.05
  -5  -6   9    6.82    0.31
  -5  -6   9    6.80    0.32
   5   6  -9    6.57    0.31
   5   6  -9    6.59    0.32
   5   6  -9    6.61    0.35
   5   6  -9    6.51    0.33
  -4  -6   9   15.65    0.67
  -4  -6   9   15.36    0.68
  -4  -6   9   15.16    0.67
   4   6  -9   16.02    0.67
   4   6  -9   14.79    0.70
   4   6  -9   15.47    0.67
   4   6  -9   14.81    0.66
   4   6  -9   14.48    0.71
  -3  -6   9   26.36    1.14
  -3  -6   9   27.25    1.15
   3   6  -9   27.44    1.19
   3   6  -9   27.64    1.14
   3   6  -9   26.56    1.17
   3   6  -9   25.70    1.14
  -2  -6   9   50.68    2.12
  -2  -6   9   52.54    2.20
  -2  -6   9   52.24    2.14
   2   6  -9   54.43    2.17
   2   6  -9   51.81    2.18
   2   6  -9   49.18    2.13
   2   6  -9   49.93    2.15
   2   6  -9   53.11    2.12
  -1  -6   9    0.77    0.12
  -1  -6   9    0.68    0.10
  -1  -6   9    0.69    0.14
   1   6  -9    0.74    0.11
   1   6  -9    0.67    0.10
   1   6  -9    0.59    0.10
   1   6  -9    0.84    0.13
   1   6  -9    0.67    0.13
   0  -6   9   12.83    0.67
   0  -6   9   12.11    0.57
   0  -6   9   12.66    0.59
   0   6  -9   13.15    0.59
   0   6  -9   13.16    0.60
   0   6  -9   12.27    0.60
   0   6  -9   13.14    0.62
   1  -6   9    9.61    0.46
   1  -6   9    9.18    0.44
  -1   6  -9    9.83    0.46
  -1   6  -9    9.66    0.46
   2  -6   9   -0.03    0.05
  -2   6  -9    0.07    0.06
  -2   6  -9    0.01    0.05
   3  -6   9   -0.02    0.04
  -3   6  -9    0.02    0.04
  -5  -6   8    0.26    0.08
  -5  -6   8    0.36    0.07
   5   6  -8    0.24    0.08
   5   6  -8    0.29    0.07
   5   6  -8    0.21    0.08
   5   6  -8    0.17    0.09
  -4  -6   8    4.49    0.26
  -4  -6   8    4.68    0.29
  -4  -6   8    4.66    0.27
   4   6  -8    4.05    0.28
   4   6  -8    4.60    0.25
   4   6  -8    4.72    0.29
   4   6  -8    4.51    0.26
   4   6  -8    3.89    0.26
   4   6  -8    4.45    0.29
  -3  -6   8   53.97    2.13
  -3  -6   8   53.24    2.12
  -3  -6   8   51.95    2.13
  -3  -6   8   49.10    2.10
   3   6  -8   46.84    2.10
   3   6  -8   53.59    2.14
   3   6  -8   49.94    2.10
   3   6  -8   50.14    2.15
   3   6  -8   50.04    2.12
   3   6  -8   50.73    2.09
  -2  -6   8  106.13    4.11
  -2  -6   8   97.59    4.05
   2   6  -8   99.84    4.05
   2   6  -8   95.48    4.07
  -1  -6   8    8.29    0.47
   1   6  -8    7.68    0.41
   0  -6   8    0.49    0.12
   0  -6   8    0.33    0.12
   0   6  -8    0.75    0.11
   0   6  -8    0.71    0.12
   1  -6   8   11.69    0.70
   1  -6   8   11.98    0.57
   1  -6   8   11.81    0.55
   1  -6   8   11.36    0.54
  -1   6  -8   12.14    0.57
  -1   6  -8   12.00    0.57
  -1   6  -8   12.42    0.58
  -1   6  -8   12.10    0.57
   2  -6   8   17.46    0.78
   2  -6   8   18.77    0.80
  -2   6  -8   18.85    0.81
  -2   6  -8   18.26    0.81
   3  -6   8    0.62    0.08
   3  -6   8    0.41    0.08
  -3   6  -8    0.49    0.10
  -3   6  -8    0.47    0.08
  -6  -6   7    4.93    0.24
   6   6  -7    4.66    0.23
   6   6  -7    4.35    0.24
   6   6  -7    4.01    0.36
  -5  -6   7    7.00    0.36
  -5  -6   7    6.70    0.34
  -5  -6   7    6.72    0.35
   5   6  -7    7.27    0.34
   5   6  -7    6.38    0.38
   5   6  -7    6.57    0.36
   5   6  -7    6.80    0.33
  -4  -6   7   19.11    0.84
  -4  -6   7   18.17    0.87
  -4  -6   7   19.16    0.87
  -4  -6   7   19.76    0.86
  -4  -6   7   19.74    0.87
  -4  -6   7   18.95    0.89
   4   6  -7   19.08    0.88
   4   6  -7   19.94    0.90
   4   6  -7   19.35    0.88
   4   6  -7   18.73    0.84
   4   6  -7   18.78    0.83
   4   6  -7   19.72    0.88
   4   6  -7   18.85    0.86
  -3  -6   7    0.48    0.14
  -3  -6   7    0.67    0.12
  -3  -6   7    0.34    0.09
   3   6  -7    0.47    0.10
   3   6  -7    0.41    0.10
  -2  -6   7    6.02    0.34
  -2  -6   7    5.76    0.36
  -2  -6   7    6.37    0.33
   2   6  -7    6.14    0.34
   2   6  -7    6.34    0.34
  -1  -6   7    1.56    0.18
  -1  -6   7    1.87    0.18
   1   6  -7    1.75    0.15
   1   6  -7    1.79    0.16
   0  -6   7   19.57    0.89
   0  -6   7   18.69    0.95
   0   6  -7   19.00    0.83
   0   6  -7   18.49    0.84
   1  -6   7   27.76    1.33
   1  -6   7   28.91    1.25
  -1   6  -7   25.99    1.18
  -1   6  -7   28.31    1.21
   2  -6   7   73.78    3.05
   2  -6   7   69.97    2.87
   2  -6   7   71.44    2.89
   2  -6   7   68.23    2.85
  -2   6  -7   73.45    2.91
  -2   6  -7   70.52    2.89
  -2   6  -7   65.96    2.87
  -2   6  -7   70.83    2.88
   3  -6   7    1.10    0.11
   3  -6   7    1.54    0.13
   3  -6   7    1.30    0.15
  -3   6  -7    1.35    0.14
  -3   6  -7    1.45    0.16
  -3   6  -7    1.12    0.16
   4  -6   7    0.16    0.05
   4  -6   7    0.07    0.05
  -4   6  -7    0.13    0.05
  -4   6  -7    0.12    0.08
  -4   6  -7   -0.03    0.16
  -6  -6   6    0.17    0.07
  -6  -6   6    0.03    0.06
   6   6  -6    0.04    0.08
   6   6  -6    0.06    0.04
   6   6  -6    0.09    0.05
   6   6  -6    0.02    0.05
  -5  -6   6   26.66    1.12
  -5  -6   6   27.26    1.15
  -5  -6   6   25.53    1.12
   5   6  -6   24.74    1.11
   5   6  -6   26.68    1.14
   5   6  -6   24.62    1.09
   5   6  -6   26.40    1.14
   5   6  -6   26.89    1.11
   5   6  -6   26.82    1.17
  -4  -6   6    0.74    0.13
  -4  -6   6    1.28    0.17
  -4  -6   6    0.78    0.13
  -4  -6   6    1.06    0.17
   4   6  -6    0.94    0.13
   4   6  -6    0.83    0.13
   4   6  -6    0.90    0.13
   4   6  -6    1.02    0.12
   4   6  -6    1.08    0.14
   4   6  -6    1.23    0.17
  -3  -6   6    3.83    0.24
  -3  -6   6    3.69    0.25
  -3  -6   6    3.28    0.23
  -3  -6   6    3.26    0.25
   3   6  -6    3.64    0.23
   3   6  -6    3.78    0.23
   3   6  -6    3.34    0.24
  -2  -6   6   13.55    0.65
  -2  -6   6   13.91    0.63
  -2  -6   6   13.14    0.70
  -2  -6   6   14.20    0.63
   2   6  -6   14.57    0.63
   2   6  -6   13.68    0.64
   2   6  -6   12.89    0.65
  -1  -6   6    6.09    0.39
  -1  -6   6    5.80    0.33
  -1  -6   6    7.85    0.38
   1   6  -6    6.24    0.35
   1   6  -6    6.47    0.35
   1   6  -6    5.84    0.32
   0  -6   6    9.74    0.48
   0  -6   6   10.14    0.57
   0  -6   6   10.86    0.56
   0  -6   6   11.15    0.54
   0   6  -6   10.12    0.51
   0   6  -6   10.15    0.50
   0   6  -6   10.68    0.48
   0   6  -6   10.36    0.49
   1  -6   6   13.72    0.67
   1  -6   6   14.31    0.75
  -1   6  -6   13.47    0.63
  -1   6  -6   13.82    0.64
   2  -6   6   52.49    2.23
  -2   6  -6   47.39    2.08
  -2   6  -6   51.14    2.10
   3  -6   6   17.30    0.74
   3  -6   6   15.45    0.71
   3  -6   6   16.59    0.73
   3  -6   6   16.43    0.76
   3  -6   6   16.56    0.75
  -3   6  -6   16.16    0.74
  -3   6  -6   15.84    0.74
  -3   6  -6   16.19    0.76
  -3   6  -6   16.55    0.77
  -3   6  -6   16.12    0.74
  -3   6  -6   16.54    0.76
   4  -6   6    0.99    0.12
   4  -6   6    0.63    0.08
   4  -6   6    0.80    0.09
  -4   6  -6    1.12    0.13
  -4   6  -6    0.67    0.09
  -4   6  -6    0.75    0.13
  -6  -6   5    2.13    0.15
  -6  -6   5    1.92    0.15
  -6  -6   5    1.55    0.16
   6   6  -5    1.76    0.13
   6   6  -5    1.71    0.15
   6   6  -5    1.74    0.14
   6   6  -5    1.99    0.17
  -5  -6   5    5.18    0.35
  -5  -6   5    5.25    0.30
  -5  -6   5    5.22    0.30
  -5  -6   5    5.29    0.35
   5   6  -5    5.14    0.29
   5   6  -5    5.26    0.31
   5   6  -5    5.13    0.34
   5   6  -5    4.87    0.31
   5   6  -5    5.13    0.30
   5   6  -5    5.86    0.32
  -4  -6   5    7.38    0.41
  -4  -6   5    6.87    0.42
  -4  -6   5    7.70    0.41
  -4  -6   5    7.78    0.41
   4   6  -5    7.97    0.42
   4   6  -5    7.78    0.41
  -3  -6   5   11.77    0.55
  -3  -6   5   11.49    0.55
  -3  -6   5   11.73    0.55
   3   6  -5   11.34    0.54
   3   6  -5   11.61    0.54
   3   6  -5   11.71    0.56
   3   6  -5   11.52    0.58
  -2  -6   5   18.55    0.77
  -2  -6   5   16.72    0.77
  -2  -6   5   16.68    0.78
  -2  -6   5   17.25    0.83
   2   6  -5   17.24    0.78
   2   6  -5   18.30    0.80
   2   6  -5   17.20    0.76
  -1  -6   5    0.02    0.04
  -1  -6   5   -0.01    0.04
   1   6  -5    0.06    0.04
   1   6  -5    0.01    0.05
   1   6  -5    0.05    0.05
   0  -6   5   42.55    1.79
   0  -6   5   40.73    1.83
   0  -6   5   45.46    1.82
   0   6  -5   41.63    1.76
   0   6  -5   43.34    1.79
   0   6  -5   42.33    1.77
   1  -6   5    6.22    0.35
   1  -6   5    5.41    0.31
   1  -6   5    6.20    0.40
  -1   6  -5    6.56    0.34
  -1   6  -5    5.93    0.34
  -1   6  -5    5.93    0.32
  -1   6  -5    6.15    0.31
   2  -6   5    0.16    0.09
   2  -6   5    0.32    0.17
   2  -6   5    0.44    0.13
  -2   6  -5    0.35    0.10
  -2   6  -5    0.36    0.08
  -2   6  -5    0.44    0.09
   3  -6   5    3.73    0.25
  -3   6  -5    3.91    0.26
  -3   6  -5    3.88    0.25
  -3   6  -5    3.99    0.26
   4  -6   5   24.26    0.98
   4  -6   5   22.03    0.96
   4  -6   5   21.99    1.03
   4  -6   5   25.22    1.03
   4  -6   5   23.83    1.00
  -4   6  -5   23.49    1.00
  -4   6  -5   21.90    0.96
  -4   6  -5   18.38    1.03
  -4   6  -5   24.01    1.02
   5  -6   5    0.07    0.06
   5  -6   5   -0.10    0.07
   5  -6   5    0.21    0.05
  -5   6  -5   -0.04    0.05
  -5   6  -5    0.08    0.09
  -5   6  -5    0.03    0.09
  -6  -6   4    0.26    0.08
  -6  -6   4    0.45    0.09
   6   6  -4    0.48    0.08
   6   6  -4    0.25    0.07
   6   6  -4    0.28    0.09
   6   6  -4    0.44    0.09
  -5  -6   4   35.75    1.49
  -5  -6   4   35.37    1.47
  -5  -6   4   34.18    1.50
  -5  -6   4   34.51    1.47
   5   6  -4   35.07    1.52
   5   6  -4   35.24    1.47
   5   6  -4   35.16    1.46
   5   6  -4   35.24    1.53
   5   6  -4   35.34    1.48
   5   6  -4   36.67    1.50
   5   6  -4   32.17    1.49
   5   6  -4   35.02    1.49
  -4  -6   4    3.64    0.23
  -4  -6   4    3.84    0.24
  -4  -6   4    2.89    0.24
  -4  -6   4    3.31    0.23
   4   6  -4    3.41    0.23
   4   6  -4    3.31    0.24
  -3  -6   4    9.27    0.45
  -3  -6   4    9.20    0.46
  -3  -6   4    9.11    0.45
   3   6  -4    9.31    0.44
   3   6  -4    9.57    0.45
   3   6  -4    9.80    0.47
   3   6  -4    9.03    0.48
  -2  -6   4    0.34    0.07
  -2  -6   4    0.31    0.07
  -2  -6   4    0.36    0.08
  -2  -6   4    0.42    0.10
   2   6  -4    0.32    0.07
   2   6  -4    0.37    0.07
   2   6  -4    0.38    0.07
   2   6  -4    0.39    0.06
  -1  -6   4    1.02    0.12
  -1  -6   4    0.94    0.10
  -1  -6   4    0.90    0.10
  -1  -6   4    0.81    0.15
   1   6  -4    0.98    0.11
   1   6  -4    1.03    0.09
   1   6  -4    1.09    0.10
   0  -6   4   55.49    2.18
   0  -6   4   49.51    2.19
   0  -6   4   50.57    2.15
   0   6  -4   52.95    2.15
   0   6  -4   55.07    2.16
   0   6  -4   50.88    2.13
   1  -6   4   36.29    1.66
   1  -6   4   40.86    1.69
   1  -6   4   38.98    1.65
   1  -6   4   43.99    1.89
   1  -6   4   39.13    1.72
  -1   6  -4   38.09    1.64
  -1   6  -4   40.26    1.66
  -1   6  -4   42.17    1.68
  -1   6  -4   38.72    1.63
   2  -6   4   13.81    0.91
   2  -6   4   14.22    0.64
   2  -6   4   14.47    0.66
   2  -6   4   15.64    0.75
   2  -6   4   12.70    0.70
  -2   6  -4   14.67    0.64
  -2   6  -4   15.22    0.67
  -2   6  -4   13.80    0.63
  -2   6  -4   15.01    0.69
  -2   6  -4   12.99    0.65
  -2   6  -4   14.98    0.66
   3  -6   4    2.44    0.38
   3  -6   4    3.36    0.24
   3  -6   4    3.11    0.21
  -3   6  -4    2.98    0.20
  -3   6  -4    2.73    0.20
  -3   6  -4    3.05    0.23
  -3   6  -4    3.22    0.23
  -3   6  -4    3.33    0.23
  -3   6  -4    3.29    0.23
   4  -6   4    5.47    0.29
   4  -6   4    5.89    0.31
   4  -6   4    6.47    0.35
   4  -6   4    5.61    0.36
   4  -6   4    6.23    0.34
  -4   6  -4    5.82    0.33
  -4   6  -4    5.29    0.33
  -4   6  -4    5.79    0.34
  -4   6  -4    5.90    0.31
  -4   6  -4    5.72    0.34
  -4   6  -4    5.63    0.33
   5  -6   4    8.08    0.35
   5  -6   4    7.74    0.39
   5  -6   4    8.04    0.37
   5  -6   4    7.89    0.39
   5  -6   4    7.64    0.41
  -5   6  -4    7.43    0.41
  -5   6  -4    7.83    0.39
  -5   6  -4    7.61    0.38
  -5   6  -4    7.81    0.36
  -6  -6   3    0.11    0.06
  -6  -6   3    0.17    0.08
   6   6  -3    0.12    0.07
   6   6  -3    0.21    0.08
   6   6  -3    0.19    0.07
   6   6  -3    0.16    0.06
  -5  -6   3    4.62    0.30
  -5  -6   3    5.62    0.33
  -5  -6   3    5.39    0.30
  -5  -6   3    5.34    0.29
  -5  -6   3    4.95    0.32
   5   6  -3    5.16    0.30
   5   6  -3    5.54    0.31
   5   6  -3    5.38    0.30
   5   6  -3    5.04    0.30
   5   6  -3    4.99    0.33
   5   6  -3    5.43    0.33
   5   6  -3    5.48    0.32
   5   6  -3    5.18    0.29
  -4  -6   3   35.81    1.47
  -4  -6   3   36.34    1.46
  -4  -6   3   31.74    1.48
  -4  -6   3   33.97    1.46
   4   6  -3   32.11    1.44
   4   6  -3   35.89    1.46
   4   6  -3   34.91    1.48
  -3  -6   3    0.16    0.06
  -3  -6   3    0.09    0.05
  -3  -6   3    0.07    0.05
   3   6  -3    0.02    0.13
   3   6  -3    0.13    0.06
   3   6  -3    0.11    0.06
  -2  -6   3  103.07    4.19
  -2  -6   3  101.54    4.19
  -2  -6   3  104.13    4.23
   2   6  -3  107.90    4.18
   2   6  -3  105.16    4.18
   2   6  -3  101.11    4.19
   2   6  -3  107.47    4.21
  -1  -6   3   11.48    0.56
  -1  -6   3   12.13    0.57
   1   6  -3   12.53    0.60
   1   6  -3   12.44    0.54
   1   6  -3   12.49    0.55
   0  -6   3    0.51    0.10
   0  -6   3    0.64    0.07
   0  -6   3    0.51    0.08
   0  -6   3    0.55    0.11
   0   6  -3    0.59    0.09
   0   6  -3    0.50    0.11
   0   6  -3    0.69    0.09
   1  -6   3    2.13    0.24
   1  -6   3    1.79    0.13
   1  -6   3    1.95    0.15
   1  -6   3    1.41    0.16
   1  -6   3    2.15    0.19
   1  -6   3    2.08    0.19
  -1   6  -3    1.72    0.12
  -1   6  -3    1.68    0.15
  -1   6  -3    1.72    0.17
  -1   6  -3    1.92    0.15
  -1   6  -3    1.76    0.15
   2  -6   3  167.85    6.71
   2  -6   3  166.15    6.65
   2  -6   3  157.09    6.93
   2  -6   3  191.74    6.81
   2  -6   3  160.23    6.69
  -2   6  -3  161.50    6.65
  -2   6  -3  156.25    6.61
  -2   6  -3  164.92    6.65
  -2   6  -3  169.75    6.67
  -2   6  -3  162.53    6.62
  -2   6  -3  174.96    6.68
  -2   6  -3  164.15    6.64
  -2   6  -3  158.15    6.62
   3  -6   3   21.91    1.10
   3  -6   3   17.82    1.21
   3  -6   3   20.51    0.89
   3  -6   3   20.97    0.94
  -3   6  -3   20.77    0.91
  -3   6  -3   20.58    0.94
  -3   6  -3   20.97    0.95
  -3   6  -3   21.00    0.90
  -3   6  -3   19.92    0.98
  -3   6  -3   20.62    0.92
  -3   6  -3   20.51    0.88
  -3   6  -3   21.56    0.94
   4  -6   3   35.40    1.94
   4  -6   3   42.25    1.79
   4  -6   3   42.51    1.72
   4  -6   3   44.01    1.74
   4  -6   3   38.78    1.71
   4  -6   3   40.41    1.77
   4  -6   3   41.10    1.73
   4  -6   3   40.06    1.70
   4  -6   3   41.62    1.75
   4  -6   3   38.94    1.70
  -4   6  -3   40.64    1.74
  -4   6  -3   43.14    1.78
  -4   6  -3   41.86    1.73
  -4   6  -3   43.68    1.76
  -4   6  -3   43.71    1.77
  -4   6  -3   40.41    1.72
  -4   6  -3   42.78    1.72
  -4   6  -3   42.03    1.74
   5  -6   3    0.06    0.09
   5  -6   3    0.12    0.06
   5  -6   3    0.03    0.06
   5  -6   3    0.03    0.06
   5  -6   3    0.10    0.07
   5  -6   3    0.00    0.05
   5  -6   3    0.02    0.05
  -5   6  -3    0.09    0.08
  -5   6  -3   -0.04    0.06
[truncated: 499,876 more chars]
