# Supplementary material for: Mechanochemical synthesis of an elusive fluorinated polyacetylene
Source: Springer Nature journal article supplement (doi:10.1038/s41557-020-00608-8), 2020-12-21
Supplement: 41557_2020_608_MOESM11_ESM.mol [file 41557_2020_608_MOESM11_ESM.mol]

nchem.20061341B-comp16.mol
  ChemDraw11162014402D

 22 26  0  0  0  0  0  0  0  0999 V2000
   -0.4125   -0.7042    0.0000 C   0  0  0  0  0  0  0  0  0  0  0  0
   -0.4125   -1.5292    0.0000 C   0  0  0  0  0  0  0  0  0  0  0  0
    0.4125   -1.5292    0.0000 C   0  0  0  0  0  0  0  0  0  0  0  0
    0.4125    0.1208    0.0000 C   0  0  0  0  0  0  0  0  0  0  0  0
   -1.2375   -0.7042    0.0000 H   0  0  0  0  0  0  0  0  0  0  0  0
    1.2375    0.1208    0.0000 F   0  0  0  0  0  0  0  0  0  0  0  0
    1.2375   -1.5219    0.0000 H   0  0  0  0  0  0  0  0  0  0  0  0
   -1.2375   -1.5208    0.0000 H   0  0  0  0  0  0  0  0  0  0  0  0
   -0.4125    0.9463    0.0000 C   0  0  0  0  0  0  0  0  0  0  0  0
   -0.4125    0.1208    0.0000 C   0  0  0  0  0  0  0  0  0  0  0  0
   -1.2375    0.1208    0.0000 F   0  0  0  0  0  0  0  0  0  0  0  0
    0.4125    0.9463    0.0000 C   0  0  0  0  0  0  0  0  0  0  0  0
    0.4125   -0.7042    0.0000 C   0  0  0  0  0  0  0  0  0  0  0  0
    1.2375   -0.7042    0.0000 H   0  0  0  0  0  0  0  0  0  0  0  0
    0.4125    1.7713    0.0000 C   0  0  0  0  0  0  0  0  0  0  0  0
   -0.4125    1.7713    0.0000 C   0  0  0  0  0  0  0  0  0  0  0  0
   -1.2375    0.9463    0.0000 F   0  0  0  0  0  0  0  0  0  0  0  0
    1.2375    0.9463    0.0000 F   0  0  0  0  0  0  0  0  0  0  0  0
   -0.4125   -2.3548    0.0000 C   0  0  0  0  0  0  0  0  0  0  0  0
    0.4125   -2.3548    0.0000 C   0  0  0  0  0  0  0  0  0  0  0  0
   -0.9960    2.3548    0.0000 F   0  0  0  0  0  0  0  0  0  0  0  0
    0.9960    2.3548    0.0000 F   0  0  0  0  0  0  0  0  0  0  0  0
  1  2  1  0      
  2  3  1  0      
  3 13  1  0      
 13  1  1  0      
 13  4  1  0      
  4 10  1  0      
 10  1  1  0      
  4 12  1  0      
 12  9  1  0      
  9 10  1  0      
  1  5  1  6      
  4  6  1  1      
  3  7  1  1      
  2  8  1  1      
 10 11  1  1      
 13 14  1  6      
 12 15  1  0      
 15 16  2  0      
 16  9  1  0      
  9 17  1  6      
 12 18  1  6      
  2 19  1  0      
 19 20  1  0      
 20  3  1  0      
 16 21  1  0      
 15 22  1  0      
M  END
