# Supplementary material for: Mechanochemical synthesis of an elusive fluorinated polyacetylene
Source: Springer Nature journal article supplement (doi:10.1038/s41557-020-00608-8), 2020-12-21
Supplement: 41557_2020_608_MOESM17_ESM.cif [file 41557_2020_608_MOESM17_ESM.cif]

 
data_su1905

_publ_section_title           SU1905
_publ_contact_author_name     'Ben Boswell'
_publ_contact_author_address  
'Dept. of Chemistry, Stanford University'
_publ_contact_author_email    bbos@stanford.edu
_publ_contact_author_phone    ?

_audit_creation_method            'SHELXL-2018/3'
_shelx_SHELXL_version_number      '2018/3'
_chemical_name_systematic         ?
_chemical_name_common             ?
_chemical_melting_point           ?
_chemical_formula_moiety          
 'C8 H12 S2' 
_chemical_formula_sum
 'C8 H12 S2' 
_chemical_formula_weight          172.30

loop_
 _atom_type_symbol
 _atom_type_description
 _atom_type_scat_dispersion_real
 _atom_type_scat_dispersion_imag
 _atom_type_scat_source
 'C'  'C'   0.0033   0.0016
 'International Tables Vol C Tables 4.2.6.8 and 6.1.1.4'
 'H'  'H'   0.0000   0.0000
 'International Tables Vol C Tables 4.2.6.8 and 6.1.1.4'
 'S'  'S'   0.1246   0.1234
 'International Tables Vol C Tables 4.2.6.8 and 6.1.1.4'
 
_space_group_crystal_system       monoclinic
_space_group_IT_number            14
_space_group_name_H-M_alt         'P 21/n'
_space_group_name_Hall            '-P 2yn'
 
_shelx_space_group_comment
;
The symmetry employed for this shelxl refinement is uniquely defined
by the following loop, which should always be used as a source of
symmetry information in preference to the above space-group names.
They are only intended as comments.
;
 
loop_
 _space_group_symop_operation_xyz
 'x, y, z'
 '-x+1/2, y+1/2, -z+1/2'
 '-x, -y, -z'
 'x-1/2, -y-1/2, z-1/2'
 
_cell_length_a                    6.8297(14)
_cell_length_b                    8.4452(18)
_cell_length_c                    7.2401(15)
_cell_angle_alpha                 90
_cell_angle_beta                  100.080(3)
_cell_angle_gamma                 90
_cell_volume                      411.15(15)
_cell_formula_units_Z             2
_cell_measurement_temperature     120(2)
_cell_measurement_reflns_used     5142
_cell_measurement_theta_min       3.74
_cell_measurement_theta_max       28.36
 
_exptl_crystal_description        block
_exptl_crystal_colour             colorless
_exptl_crystal_density_meas       ?
_exptl_crystal_density_method     ?
_exptl_crystal_density_diffrn     1.392          
_exptl_crystal_F_000              184
_exptl_transmission_factor_min    ?
_exptl_transmission_factor_max    ?
_exptl_crystal_size_max           0.296
_exptl_crystal_size_mid           0.189
_exptl_crystal_size_min           0.184
_exptl_absorpt_coefficient_mu     0.566
_shelx_estimated_absorpt_T_min    0.850
_shelx_estimated_absorpt_T_max    0.903
_exptl_absorpt_correction_type    numerical
_exptl_absorpt_correction_T_min   0.8944
_exptl_absorpt_correction_T_max   0.9565
_exptl_absorpt_process_details    
'SADABS (Krause et al., 2015)'
_exptl_absorpt_special_details    ?
_diffrn_ambient_temperature       120(2) 
_diffrn_radiation_wavelength      0.71073 
_diffrn_radiation_type            MoK\a 
_diffrn_radiation_source          'fine-focus sealed tube' 
_diffrn_radiation_monochromator   graphite 
_diffrn_measurement_device_type   'Bruker Kappa X8-APEX-II'
_diffrn_measurement_method        
'combination of \w and \f-scans '
_diffrn_detector_area_resol_mean  8.33 
_diffrn_reflns_number             4934
_diffrn_reflns_av_unetI/netI      0.0117
_diffrn_reflns_av_R_equivalents   0.0160
_diffrn_reflns_limit_h_min        -9
_diffrn_reflns_limit_h_max        9
_diffrn_reflns_limit_k_min        -11
_diffrn_reflns_limit_k_max        11
_diffrn_reflns_limit_l_min        -9
_diffrn_reflns_limit_l_max        9
_diffrn_reflns_theta_min          3.740
_diffrn_reflns_theta_max          28.361
_diffrn_reflns_theta_full         25.242
_diffrn_measured_fraction_theta_max   0.998
_diffrn_measured_fraction_theta_full  1.000
_diffrn_reflns_Laue_measured_fraction_max    0.998
_diffrn_reflns_Laue_measured_fraction_full   1.000
_diffrn_reflns_point_group_measured_fraction_max   0.998
_diffrn_reflns_point_group_measured_fraction_full  1.000
_reflns_number_total              1030
_reflns_number_gt                 944
_reflns_threshold_expression      'I > 2\s(I)'
_reflns_Friedel_coverage          0.000
_reflns_Friedel_fraction_max      .
_reflns_Friedel_fraction_full     .
 
_reflns_special_details
;
 Reflections were merged by SHELXL according to the crystal
 class for the calculation of statistics and refinement.
 
 _reflns_Friedel_fraction is defined as the number of unique
 Friedel pairs measured divided by the number that would be
 possible theoretically, ignoring centric projections and
 systematic absences.
;
 
_computing_data_collection        'Bruker APEX-3 (Bruker, 2015)' 
_computing_cell_refinement        'Bruker SAINT (Bruker, 2015)' 
_computing_data_reduction         'Bruker SAINT (Bruker, 2015)' 
_computing_structure_solution     'SHELXT-2018/2 (Sheldrick, 2015)' 
_computing_structure_refinement   'SHELXL-2018/3 (Sheldrick, 2015)'
_computing_molecular_graphics     'Bruker XP (Bruker, 2015)'
_computing_publication_material   'CIFTAB (Sheldrick, 2008)'
_refine_special_details           ?
_refine_ls_structure_factor_coef  Fsqd
_refine_ls_matrix_type            full
_refine_ls_weighting_scheme       calc
_refine_ls_weighting_details
'w=1/[\s^2^(Fo^2^)+(0.0271P)^2^+0.2017P] where P=(Fo^2^+2Fc^2^)/3'
_atom_sites_solution_primary      dual
_atom_sites_solution_secondary    difmap
_atom_sites_solution_hydrogens    geom
_refine_ls_hydrogen_treatment     constr
_refine_ls_extinction_method      none
_refine_ls_extinction_coef        .
_refine_ls_number_reflns          1030
_refine_ls_number_parameters      46
_refine_ls_number_restraints      0
_refine_ls_R_factor_all           0.0264
_refine_ls_R_factor_gt            0.0235
_refine_ls_wR_factor_ref          0.0609
_refine_ls_wR_factor_gt           0.0591
_refine_ls_goodness_of_fit_ref    1.069
_refine_ls_restrained_S_all       1.069
_refine_ls_shift/su_max           0.000
_refine_ls_shift/su_mean          0.000
 
loop_
 _atom_site_label
 _atom_site_type_symbol
 _atom_site_fract_x
 _atom_site_fract_y
 _atom_site_fract_z
 _atom_site_U_iso_or_equiv
 _atom_site_adp_type
 _atom_site_occupancy
 _atom_site_site_symmetry_order  
 _atom_site_calc_flag
 _atom_site_refinement_flags_posn
 _atom_site_refinement_flags_adp
 _atom_site_refinement_flags_occupancy
 _atom_site_disorder_assembly
 _atom_site_disorder_group
S1 S 0.17320(4) 0.30273(4) 0.50482(4) 0.02209(11) Uani 1 1 d . . . . .
C1 C 0.41801(17) 0.23369(14) 0.47329(17) 0.0196(2) Uani 1 1 d . . . . .
H1A H 0.465322 0.148138 0.563617 0.024 Uiso 1 1 calc R U . . .
H1B H 0.413448 0.192829 0.344445 0.024 Uiso 1 1 calc R U . . .
C2 C 0.55445(15) 0.37702(12) 0.50821(15) 0.0152(2) Uani 1 1 d . . . . .
H2 H 0.697236 0.347749 0.549798 0.018 Uiso 1 1 calc R U . . .
C3 C 0.52445(15) 0.50617(13) 0.35374(14) 0.0150(2) Uani 1 1 d . . . . .
H3 H 0.421895 0.477477 0.242546 0.018 Uiso 1 1 calc R U . . .
C4 C 0.71569(16) 0.57095(14) 0.30115(16) 0.0187(2) Uani 1 1 d . . . . .
H4B H 0.686227 0.632724 0.183341 0.022 Uiso 1 1 calc R U . . .
H4A H 0.806975 0.483352 0.283528 0.022 Uiso 1 1 calc R U . . .
 
loop_
 _atom_site_aniso_label
 _atom_site_aniso_U_11
 _atom_site_aniso_U_22
 _atom_site_aniso_U_33
 _atom_site_aniso_U_23
 _atom_site_aniso_U_13
 _atom_site_aniso_U_12
S1 0.01626(16) 0.02481(17) 0.02517(17) -0.00055(11) 0.00355(11) -0.00363(10)
C1 0.0219(5) 0.0167(5) 0.0212(5) -0.0008(4) 0.0061(4) 0.0000(4)
C2 0.0143(5) 0.0162(5) 0.0153(5) 0.0006(4) 0.0031(4) 0.0026(4)
C3 0.0144(5) 0.0174(5) 0.0133(5) 0.0004(4) 0.0024(4) 0.0016(4)
C4 0.0179(5) 0.0216(5) 0.0179(5) 0.0009(4) 0.0065(4) 0.0011(4)
 
_geom_special_details
;
 All esds (except the esd in the dihedral angle between two l.s. planes)
 are estimated using the full covariance matrix.  The cell esds are taken
 into account individually in the estimation of esds in distances, angles
 and torsion angles; correlations between esds in cell parameters are only
 used when they are defined by crystal symmetry.  An approximate (isotropic)
 treatment of cell esds is used for estimating esds involving l.s. planes.
;
 
loop_
 _geom_bond_atom_site_label_1
 _geom_bond_atom_site_label_2
 _geom_bond_distance
 _geom_bond_site_symmetry_2
 _geom_bond_publ_flag
S1 C4 1.8205(12) 3_666 ?
S1 C1 1.8225(12) . ?
C1 C2 1.5215(15) . ?
C1 H1A 0.9900 . ?
C1 H1B 0.9900 . ?
C2 C3 1.5499(15) . ?
C2 C3 1.5656(14) 3_666 ?
C2 H2 1.0000 . ?
C3 C4 1.5245(15) . ?
C3 H3 1.0000 . ?
C4 H4B 0.9900 . ?
C4 H4A 0.9900 . ?
 
loop_
 _geom_angle_atom_site_label_1
 _geom_angle_atom_site_label_2
 _geom_angle_atom_site_label_3
 _geom_angle
 _geom_angle_site_symmetry_1
 _geom_angle_site_symmetry_3
 _geom_angle_publ_flag
C4 S1 C1 90.94(5) 3_666 . ?
C2 C1 S1 105.86(7) . . ?
C2 C1 H1A 110.6 . . ?
S1 C1 H1A 110.6 . . ?
C2 C1 H1B 110.6 . . ?
S1 C1 H1B 110.6 . . ?
H1A C1 H1B 108.7 . . ?
C1 C2 C3 116.12(9) . . ?
C1 C2 C3 109.77(8) . 3_666 ?
C3 C2 C3 90.03(8) . 3_666 ?
C1 C2 H2 113.0 . . ?
C3 C2 H2 113.0 . . ?
C3 C2 H2 113.0 3_666 . ?
C4 C3 C2 114.95(9) . . ?
C4 C3 C2 109.81(9) . 3_666 ?
C2 C3 C2 89.97(8) . 3_666 ?
C4 C3 H3 113.3 . . ?
C2 C3 H3 113.3 . . ?
C2 C3 H3 113.3 3_666 . ?
C3 C4 S1 106.09(7) . 3_666 ?
C3 C4 H4B 110.5 . . ?
S1 C4 H4B 110.5 3_666 . ?
C3 C4 H4A 110.5 . . ?
S1 C4 H4A 110.5 3_666 . ?
H4B C4 H4A 108.7 . . ?
 
loop_
 _geom_torsion_atom_site_label_1
 _geom_torsion_atom_site_label_2
 _geom_torsion_atom_site_label_3
 _geom_torsion_atom_site_label_4
 _geom_torsion
 _geom_torsion_site_symmetry_1
 _geom_torsion_site_symmetry_2
 _geom_torsion_site_symmetry_3
 _geom_torsion_site_symmetry_4
 _geom_torsion_publ_flag
C4 S1 C1 C2 -37.86(8) 3_666 . . . ?
S1 C1 C2 C3 -72.25(10) . . . . ?
S1 C1 C2 C3 27.93(10) . . . 3_666 ?
C1 C2 C3 C4 -135.92(10) . . . . ?
C3 C2 C3 C4 111.94(10) 3_666 . . . ?
C1 C2 C3 C2 112.14(10) . . . 3_666 ?
C3 C2 C3 C2 0.0 3_666 . . 3_666 ?
C2 C3 C4 S1 -73.60(10) . . . 3_666 ?
C2 C3 C4 S1 26.02(10) 3_666 . . 3_666 ?
 
_refine_diff_density_max    0.412
_refine_diff_density_min   -0.147
_refine_diff_density_rms    0.049

_shelx_res_file
;
TITL su1904_a.res in P2(1)/n
    su1905.res
    created by SHELXL-2018/3 at 13:39:27 on 01-Jun-2019
REM Old TITL SU1904 in P2(1)/n
REM SHELXT solution in P2(1)/n
REM R1 0.080, Rweak 0.001, Alpha 0.011, Orientation as input
REM Formula found by SHELXT: C4 S
CELL 0.71073 6.8297 8.4452 7.2401 90 100.08 90
ZERR 2 0.0014 0.0018 0.0015 0 0.003 0
LATT 1
SYMM 0.5-X,0.5+Y,0.5-Z
SFAC C H S
UNIT 16 24 4

L.S. 5
PLAN  20
SIZE 0.184 0.189 0.296
TEMP -153.16
BOND $H
FMAP 2
CONF
ACTA

WGHT    0.027100    0.201700
FVAR       1.53373
S1    3    0.173197    0.302734    0.504821    11.00000    0.01626    0.02481 =
         0.02517   -0.00055    0.00355   -0.00363
C1    1    0.418014    0.233690    0.473292    11.00000    0.02186    0.01674 =
         0.02116   -0.00079    0.00609   -0.00002
AFIX  23
H1A   2    0.465322    0.148138    0.563617    11.00000   -1.20000
H1B   2    0.413448    0.192829    0.344445    11.00000   -1.20000
AFIX   0
C2    1    0.554447    0.377018    0.508212    11.00000    0.01433    0.01615 =
         0.01530    0.00057    0.00309    0.00260
AFIX  13
H2    2    0.697236    0.347749    0.549798    11.00000   -1.20000
AFIX   0
C3    1    0.524447    0.506173    0.353737    11.00000    0.01437    0.01743 =
         0.01326    0.00038    0.00242    0.00161
AFIX  13
H3    2    0.421895    0.477477    0.242546    11.00000   -1.20000
AFIX   0
C4    1    0.715687    0.570949    0.301150    11.00000    0.01792    0.02157 =
         0.01792    0.00086    0.00648    0.00115
AFIX  23
H4B   2    0.686227    0.632724    0.183341    11.00000   -1.20000
H4A   2    0.806975    0.483352    0.283528    11.00000   -1.20000

AFIX   0
HKLF 4


REM  su1904_a.res in P2(1)/n
REM wR2 = 0.0609, GooF = S = 1.069, Restrained GooF = 1.069 for all data
REM R1 = 0.0235 for 944 Fo > 4sig(Fo) and 0.0264 for all 1030 data
REM 46 parameters refined using 0 restraints

END

WGHT      0.0270      0.2028

REM Highest difference peak  0.412,  deepest hole -0.147,  1-sigma level  0.049
Q1    1   0.4816  0.3066  0.4844  11.00000  0.05    0.41
Q2    1   0.6221  0.5451  0.3374  11.00000  0.05    0.37
Q3    1   0.5390  0.4321  0.4267  11.00000  0.05    0.35
Q4    1   0.5096  0.4221  0.5858  11.00000  0.05    0.35
Q5    1   0.7610  0.6360  0.3836  11.00000  0.05    0.29
Q6    1   0.3117  0.2705  0.4807  11.00000  0.05    0.26
Q7    1   0.1468  0.3826  0.4239  11.00000  0.05    0.18
Q8    1   0.0869  0.2436  0.5553  11.00000  0.05    0.17
Q9    1   0.4836  0.4872  0.2936  11.00000  0.05    0.16
Q10   1   0.5956  0.3712  0.5419  11.00000  0.05    0.14
Q11   1   0.4296  0.1946  0.4169  11.00000  0.05    0.13
Q12   1   0.8401  0.5391  0.2690  11.00000  0.05    0.12
Q13   1   0.7849  0.5346  0.3104  11.00000  0.05    0.12
Q14   1   0.8719  0.4936  0.3354  11.00000  0.05    0.12
Q15   1   0.7128  0.6316  0.2449  11.00000  0.05    0.11
Q16   1   0.4216  0.1773  0.5273  11.00000  0.05    0.11
Q17   1   0.3437  0.1550  0.3589  11.00000  0.05    0.09
Q18   1   0.4557  0.1111  0.6492  11.00000  0.05    0.08
Q19   1   0.8921  0.4425  0.4881  11.00000  0.05    0.08
Q20   1   1.0334  0.4138  0.3052  11.00000  0.05    0.08
;
_shelx_res_checksum   56169

_shelx_hkl_file
;
   1   0   0    0.60    0.40
   1   0   0   -0.80    0.50
  -1   0   0    0.00    0.40
  -1   0   0   -0.50    0.50
   2   0   0   81.89    2.30
   2   0   0   79.59    2.40
  -2   0   0   83.29    2.30
  -2   0   0   77.89    2.30
   3   0   0    0.00    1.00
   3   0   0    0.60    0.90
  -3   0   0   -1.80    0.80
   4   0   0    2.10    1.30
   4   0   0    0.00    1.10
  -4   0   0   -0.60    1.10
   5   0   0    0.50    1.40
   5   0   0   -0.20    1.50
  -5   0   0   -1.40    1.20
   6   0   0  690.13   12.60
   6   0   0  699.03   12.40
  -6   0   0  706.23   12.60
   7   0   0    2.10    2.70
   7   0   0   -0.40    2.40
  -7   0   0   -0.10    2.30
   8   0   0  721.33   15.20
   8   0   0  717.73   14.80
  -8   0   0  684.83   15.00
   9   0  -1  170.98    9.80
   9   0  -1  167.38    8.40
   8   0  -1   -3.70    3.10
   8   0  -1   -0.30    3.10
  -7   0   1  638.14   12.80
   7   0  -1  640.44   12.90
   7   0  -1  641.94   12.90
  -6   0   1    0.20    1.80
   6   0  -1   -0.90    1.80
   6   0  -1    0.30    1.70
  -5   0   1 1328.37   17.90
  -5   0   1 1324.77   17.60
   5   0  -1 1333.37   17.80
   5   0  -1 1308.77   17.70
  -4   0   1   -0.60    1.00
  -4   0   1    0.40    1.30
   4   0  -1    2.80    1.20
   4   0  -1    0.30    1.20
  -3   0   1 9999.00   95.59
  -3   0   1 9718.83   95.99
   3   0  -1 9889.81   95.89
   3   0  -1 9768.82   95.59
  -2   0   1    2.10    0.80
  -2   0   1    1.50    0.90
  -2   0   1    0.60    0.70
   2   0  -1    0.80    0.80
   2   0  -1    0.60    0.70
  -1   0   1   71.39    1.50
  -1   0   1   72.49    1.90
  -1   0   1   75.99    1.40
   1   0  -1   75.19    1.60
   1   0  -1   73.09    1.80
   0   0   1    5.60    0.60
   0   0  -1    3.40    0.40
  -1   0  -1 5879.31   57.59
   2   0   1    1.20    0.70
  -2   0  -1    0.50    0.80
   3   0   1 3417.76   36.30
   3   0   1 3533.15   36.20
  -3   0  -1 3490.35   36.50
   4   0   1   -0.70    1.20
   4   0   1   -1.30    1.00
  -4   0  -1    0.40    1.20
   5   0   1  458.95    8.90
   5   0   1  451.85    9.10
  -5   0  -1  448.86    9.10
   6   0   1   -2.80    1.80
   6   0   1    0.80    2.20
  -6   0  -1    2.10    2.00
   7   0   1  129.89    6.60
   7   0   1  133.29    6.30
  -7   0  -1  118.69    6.20
   8   0   1   -0.70    2.90
   8   0   1    1.50    3.10
  -8   0  -1   -4.30    3.10
   9   0  -2    0.80    4.20
   9   0  -2   -0.10    3.50
   8   0  -2  959.90   17.70
   8   0  -2  956.50   17.70
  -7   0   2    0.30    2.30
  -7   0   2   -0.10    3.00
   7   0  -2   -0.30    2.60
   7   0  -2    1.60    2.40
  -6   0   2  218.68    6.40
  -6   0   2  203.78    6.90
   6   0  -2  211.88    6.70
  -5   0   2   -0.50    1.40
  -5   0   2    0.60    1.70
   5   0  -2    0.10    1.50
   5   0  -2    0.50    1.40
  -4   0   2  932.71   12.20
  -4   0   2  878.61   12.80
   4   0  -2  879.11   12.30
   4   0  -2  900.21   12.70
  -3   0   2   -0.10    0.80
  -3   0   2    1.50    1.10
  -3   0   2   -0.20    0.90
   3   0  -2    1.30    1.00
   3   0  -2    0.40    0.90
  -2   0   2   45.10    1.80
  -2   0   2   45.30    1.60
  -2   0   2   46.90    1.60
  -2   0   2   42.40    2.20
   2   0  -2   43.70    1.80
   2   0  -2   42.80    2.00
  -1   0   2    1.40    0.90
   1   0  -2    1.00    0.70
   0   0   2 9338.37   87.29
   0   0  -2 8698.63   86.19
  -1   0  -2   -0.50    0.60
  -2   0  -2   14.60    1.40
   3   0   2    0.80    0.90
  -3   0  -2    0.00    1.00
   4   0   2  482.25    8.80
   4   0   2  483.25    8.40
  -4   0  -2  478.05    8.80
   5   0   2   -0.10    1.60
   5   0   2    1.30    1.90
  -5   0  -2   -0.60    1.60
   6   0   2  903.41   14.90
   6   0   2  911.21   15.30
  -6   0  -2  906.81   15.50
   7   0   2    2.40    2.50
   7   0   2   -0.40    2.80
  -7   0  -2   -1.10    2.80
   8   0   2  441.76   11.70
   8   0   2  467.15   12.50
  -8   0  -2  425.06   12.40
   9   0  -3    7.10    3.80
   9   0  -3   12.90    4.60
  -8   0   3    3.10    3.60
   8   0  -3   -2.10    3.30
   8   0  -3   -2.80    2.90
  -7   0   3  446.26   11.20
   7   0  -3  439.56   10.60
   7   0  -3  453.55   10.90
  -6   0   3    1.60    2.30
   6   0  -3    0.00    1.70
   6   0  -3   -2.60    2.00
  -5   0   3 1600.54   21.50
   5   0  -3 1615.14   21.20
   5   0  -3 1648.64   20.50
  -4   0   3    1.50    1.40
  -4   0   3    1.20    1.20
   4   0  -3    2.10    1.40
   4   0  -3    0.20    1.20
  -3   0   3 2142.29   22.40
  -3   0   3 2143.99   24.60
  -3   0   3 2103.19   22.90
   3   0  -3 2157.18   24.20
   3   0  -3 2144.09   23.10
  -2   0   3   -0.80    0.70
  -2   0   3   -0.40    0.90
   2   0  -3    0.30    0.70
   2   0  -3    1.50    0.90
  -1   0   3    0.60    1.00
   1   0  -3    0.30    0.80
   0   0   3    1.50    1.00
   1   0   3  718.63    9.70
  -2   0  -3    0.70    0.90
  -3   0  -3 2288.07   26.00
   4   0   3   -1.00    1.20
   4   0   3   -1.50    1.40
  -4   0  -3   -0.80    1.30
   5   0   3 1842.02   23.20
   5   0   3 1818.42   23.70
  -5   0  -3 1788.32   23.80
   6   0   3    2.40    2.20
   6   0   3    1.30    2.50
  -6   0  -3   -0.50    2.40
   7   0   3   50.09    4.40
   7   0   3   50.29    4.80
  -7   0  -3   51.09    5.10
   8   0   3   -2.80    3.30
   8   0   3   -3.80    3.00
  -8   0  -3    0.70    4.30
  -8   0   4 1021.30   19.20
   8   0  -4  952.40   18.20
   8   0  -4  982.50   17.80
  -7   0   4   -2.40    3.00
   7   0  -4   -2.20    2.60
   7   0  -4   -1.10    2.60
  -6   0   4  850.31   15.20
   6   0  -4  860.71   14.80
   6   0  -4  828.32   13.70
  -5   0   4   -0.20    1.80
   5   0  -4    2.10    1.70
   5   0  -4    1.30    1.70
  -4   0   4  530.65    8.30
  -4   0   4  531.85   10.10
  -4   0   4  526.15    7.70
   4   0  -4  534.95    9.60
   4   0  -4  521.95    8.50
  -3   0   4    0.00    1.10
  -3   0   4    0.10    1.00
  -3   0   4    0.70    1.40
   3   0  -4   -0.30    1.10
   3   0  -4   -0.70    0.90
  -2   0   4   59.59    3.10
  -2   0   4   57.19    2.70
   2   0  -4   58.69    2.70
  -1   0   4   -1.00    1.10
   1   0  -4    0.70    0.90
   0   0   4 4696.43   48.30
   1   0   4    0.80    1.00
   2   0   4 1668.93   18.80
   2   0   4 1673.83   20.40
  -2   0  -4 1676.53   19.20
   3   0   4    1.60    1.20
  -3   0  -4    1.60    1.30
   4   0   4  268.67    6.70
   4   0   4  265.47    6.50
  -4   0  -4  264.57    6.80
   5   0   4   -0.90    1.90
   5   0   4    2.60    1.80
   5   0   4    1.40    1.90
  -5   0  -4    2.60    2.20
   6   0   4    5.20    2.80
   6   0   4    4.20    2.50
  -6   0  -4    6.40    3.00
   7   0   4    5.90    3.30
   7   0   4   -1.40    2.90
  -7   0  -4    0.10    3.10
  -8   0   5   -5.60    3.60
   8   0  -5   -2.90    3.30
   8   0  -5    3.10    3.50
  -7   0   5  373.96   11.10
   7   0  -5  369.36   10.50
   7   0  -5  371.36    9.50
  -6   0   5   -0.70    2.50
   6   0  -5    0.70    2.00
   6   0  -5   -2.10    2.30
  -5   0   5   38.40    3.00
  -5   0   5   30.30    3.50
   5   0  -5   30.10    3.20
   5   0  -5   35.70    2.80
  -4   0   5   -0.50    1.40
  -4   0   5   -0.70    1.90
  -4   0   5    2.90    1.40
   4   0  -5   -1.00    1.60
   4   0  -5    0.30    1.30
  -3   0   5 2523.05   30.00
  -3   0   5 2469.25   27.90
   3   0  -5 2564.34   29.20
  -2   0   5   -0.30    1.50
  -2   0   5    1.60    1.40
   2   0  -5    1.60    1.30
  -1   0   5    1.60    1.40
   1   0  -5    2.60    1.20
   0   0   5   -0.20    1.20
   1   0   5   30.40    2.70
   2   0   5   -0.20    1.20
  -2   0  -5    0.50    1.10
   3   0   5  362.56    6.90
   3   0   5  371.36    8.10
  -3   0  -5  361.16    7.40
   4   0   5    1.20    1.60
   4   0   5   -6.10    1.60
   4   0   5   -0.30    1.70
   4   0   5   -2.20    1.40
   4   0   5    1.00    1.80
  -4   0  -5   -1.60    1.70
   5   0   5  794.62   13.80
   5   0   5  810.12   14.00
   5   0   5  779.02   14.30
   5   0   5  785.12   13.00
   5   0   5  813.62   13.10
  -5   0  -5  805.42   14.40
   6   0   5   -2.00    2.70
   6   0   5   -3.60    2.60
   6   0   5    0.40    2.50
  -6   0  -5   -2.60    2.80
  -8   0   6  106.19    8.80
   8   0  -6  107.89    8.20
  -7   0   6    5.40    3.50
   7   0  -6    3.80    3.20
  -6   0   6  451.05   11.60
   6   0  -6  452.75   11.10
  -5   0   6    0.50    2.50
  -5   0   6    0.70    1.80
   5   0  -6   -0.90    2.20
  -4   0   6   35.40    2.90
  -4   0   6   34.30    3.80
   4   0  -6   39.50    3.50
  -3   0   6    0.10    2.00
  -3   0   6    0.40    1.70
   3   0  -6   -0.80    1.60
  -2   0   6   23.80    2.60
  -2   0   6   27.40    3.10
   2   0  -6   25.10    2.60
  -1   0   6   -0.90    1.70
  -1   0   6    0.30    1.60
   1   0  -6   -0.10    1.30
   0   0   6 3125.39   36.00
   0   0   6 3181.88   36.00
   1   0   6    2.80    1.70
   2   0   6  291.87    7.60
   3   0   6    1.90    1.70
   3   0   6   -1.70    1.80
   3   0   6   -5.60    2.00
   4   0   6  139.39    5.20
   4   0   6  138.59    5.70
   4   0   6  145.89    6.10
   4   0   6  140.09    5.90
   5   0   6   -0.80    2.40
   5   0   6   -0.30    2.40
   5   0   6    2.30    2.30
  -7   0   7   49.99    5.60
   7   0  -7   55.19    5.30
  -6   0   7    2.80    3.20
   6   0  -7   -1.00    2.90
  -5   0   7  149.29    7.20
   5   0  -7  142.49    6.60
  -4   0   7    0.40    2.10
  -4   0   7    4.80    2.80
   4   0  -7   -0.20    2.20
  -3   0   7 2695.53   32.30
  -3   0   7 2776.12   34.30
   3   0  -7 2736.13   32.80
  -2   0   7    0.90    2.00
  -2   0   7   -3.40    2.10
   2   0  -7   -2.90    1.70
  -1   0   7    6.00    2.30
  -1   0   7    6.00    2.40
   0   0   7    1.10    2.00
   0   0   7    0.60    2.00
   1   0   7   84.09    4.80
   1   0   7   91.39    5.00
   2   0   7   -0.50    2.00
   2   0   7   -2.20    2.20
   3   0   7  568.74   12.00
   3   0   7  564.74   12.10
   4   0   7    2.70    2.50
   4   0   7    7.20    2.90
  -6   0   8  338.47   11.20
   6   0  -8  332.87   10.50
  -5   0   8    3.40    3.00
   5   0  -8   -1.10    2.80
  -4   0   8  121.69    6.80
  -4   0   8  117.69    5.90
   4   0  -8  128.29    6.30
  -3   0   8   -5.00    2.50
  -3   0   8   -1.00    2.20
   3   0  -8    1.30    2.30
  -2   0   8  156.18    6.60
  -2   0   8  152.38    6.80
  -1   0   8    0.10    2.30
  -1   0   8    2.20    2.50
   0   0   8  694.63   13.70
   0   0   8  702.53   13.70
   1   0   8   -0.80    2.40
   1   0   8   -0.70    2.40
   2   0   8   61.99    5.10
   2   0   8   54.29    4.70
   3   0   8   -4.10    2.70
   3   0   8    1.00    2.80
  -4   0   9   -0.10    3.30
  -4   0   9    1.20    2.90
   4   0  -9   -3.20    2.70
  -3   0   9  297.27   10.10
  -3   0   9  304.57    9.40
   3   0  -9  309.07   11.10
  -2   0   9   -3.20    2.90
  -2   0   9   -3.70    2.70
  -1   0   9    3.70    3.00
  -1   0   9    1.70    3.00
   0   0   9   -1.60    2.70
   0   0   9   -1.20    2.90
   1   0   9   47.20    4.80
   1   0   9   47.30    4.90
   1  -1   9  289.27    9.60
   0  -1   9   52.69    5.10
   0  -1   9   47.70    4.90
  -1  -1   9   80.09    5.90
  -1  -1   9   64.59    5.60
  -2  -1   9    5.10    3.30
  -2  -1   9    0.20    2.70
  -3  -1   9    1.20    3.00
  -3  -1   9    3.70    3.30
   4   1  -9   77.99    6.10
  -4  -1   9   74.09    6.50
  -4  -1   9   78.69    6.10
   3  -1   8  217.58    8.30
   2  -1   8  183.38    7.50
   1  -1   8    2.60    2.40
   1  -1   8    2.40    2.50
   0  -1   8    3.60    2.40
   0  -1   8   -1.80    2.30
  -1  -1   8   15.20    3.20
  -1  -1   8   15.20    3.10
  -2  -1   8  495.25   11.40
  -2  -1   8  495.65   11.00
   3   1  -8  121.69    6.10
  -3  -1   8  117.79    6.00
  -3  -1   8  119.99    6.50
   4   1  -8  311.67    9.20
  -4  -1   8  312.97    9.80
  -4  -1   8  305.57    8.60
  -5  -1   8   32.90    4.60
   6   1  -8   -1.20    2.90
  -6  -1   8   -0.10    3.40
   4  -1   7    2.00    2.60
   3  -1   7   36.90    4.00
   2  -1   7  114.79    5.60
   2  -1   7  109.89    5.10
   1  -1   7  585.74   11.20
   1  -1   7  589.94   11.60
   0  -1   7  259.77    7.40
   0  -1   7  265.57    7.30
  -1  -1   7  226.18    6.90
  -1  -1   7  223.18    6.90
   2   1  -7  125.89    5.40
  -2  -1   7  130.29    5.70
  -2  -1   7  129.09    5.40
   3   1  -7    6.70    2.30
  -3  -1   7    1.40    2.30
  -3  -1   7    4.30    2.50
   4   1  -7    5.40    2.50
  -4  -1   7    2.20    2.70
  -4  -1   7    8.00    2.50
   5   1  -7  283.07    8.80
  -5  -1   7  275.17    9.00
   6   1  -7   54.09    5.10
  -6  -1   7   46.40    5.10
   7   1  -7  176.78    8.80
  -7  -1   7  202.08    9.00
   5  -1   6    2.10    3.10
   5  -1   6    5.40    2.60
   4  -1   6  260.07   10.30
   4  -1   6  254.57    7.40
   3  -1   6   47.50    3.60
   3  -1   6   42.30    3.60
   2  -1   6  215.98    6.20
   2  -1   6  221.48    6.60
   1  -1   6  185.48    5.50
   1  -1   6  196.18    6.00
   0  -1   6   24.10    2.60
   0  -1   6   17.40    2.50
  -1  -1   6    0.30    1.70
  -1  -1   6   -0.90    1.60
   2   1  -6 1069.79   15.50
  -2  -1   6 1040.20   15.10
  -2  -1   6 1051.19   15.70
   3   1  -6  728.53   12.40
  -3  -1   6  704.33   11.60
  -3  -1   6  713.03   12.70
   4   1  -6  725.13   13.00
  -4  -1   6  736.13   13.50
  -4  -1   6  711.43   11.50
   5   1  -6   11.60    2.90
  -5  -1   6   17.10    3.30
   6   1  -6    0.70    2.60
  -6  -1   6   -3.00    2.60
   7   1  -6    1.90    3.00
  -7  -1   6    2.40    3.30
  -6   1  -5    6.40    3.30
   6  -1   5    4.00    3.00
   6  -1   5    3.50    2.70
  -5   1  -5  375.56    9.50
   5  -1   5  373.66    9.30
   5  -1   5  367.36   12.20
   5  -1   5  388.16    9.60
   5  -1   5  367.96    9.30
  -4   1  -5   10.30    2.50
   4  -1   5    9.20    1.90
   4  -1   5    9.60    2.20
   4  -1   5    9.50    2.10
  -3   1  -5  128.19    4.60
   3  -1   5  121.79    4.50
   3  -1   5  116.29    4.70
  -2   1  -5  301.97    6.00
   2  -1   5  300.07    6.90
   2  -1   5  287.07    6.50
   1  -1   5 1776.22   21.40
   1  -1   5 1766.52   21.70
   0  -1   5  829.42   12.20
   0  -1   5  791.22   11.70
   1   1  -5  971.20   12.10
   1   1  -5  993.60   13.70
  -1  -1   5 1003.50   13.90
  -1  -1   5 1015.50   13.80
   2   1  -5   16.90    1.70
   2   1  -5   17.10    2.10
  -2  -1   5   14.60    2.20
  -2  -1   5   16.40    2.10
   3   1  -5    4.40    1.70
   3   1  -5    2.00    1.20
  -3  -1   5    0.30    1.70
  -3  -1   5   -0.20    1.40
   4   1  -5   37.40    3.00
   4   1  -5   45.70    3.60
  -4  -1   5   48.00    4.00
  -4  -1   5   39.10    2.90
   5   1  -5  469.35    9.10
   5   1  -5  471.05   10.20
  -5  -1   5  466.55   10.50
   6   1  -5  160.28    6.70
   6   1  -5  157.88    6.00
  -6  -1   5  161.88    7.00
   7   1  -5  384.96    9.90
   7   1  -5  365.66   10.50
  -7  -1   5  374.96   10.90
   8   1  -5    5.60    3.40
   8   1  -5    6.80    3.80
  -8  -1   5    8.40    3.90
  -7   1  -4   97.59    6.70
   7  -1   4  107.89    7.00
   7  -1   4  106.59    6.60
  -6   1  -4  275.47    8.80
   6  -1   4  229.88    7.80
   6  -1   4  254.17    8.40
  -5   1  -4  303.37    8.20
   5  -1   4  296.07    9.70
   5  -1   4  296.47    7.80
   5  -1   4  296.77    8.10
  -4   1  -4  828.32   13.20
   4  -1   4  833.82   12.10
   4  -1   4  831.42   13.20
  -3   1  -4   89.59    3.70
   3  -1   4   92.29    3.60
   3  -1   4   89.59    3.60
  -2   1  -4  849.22   11.50
   2  -1   4  854.61   11.80
   2  -1   4  859.31   12.10
   1  -1   4  472.35    7.60
   1  -1   4  460.45    7.90
   0  -1   4    1.50    1.00
   0  -1   4    4.10    1.40
   1   1  -4   28.90    1.70
   1   1  -4   33.00    2.20
  -1  -1   4   32.40    2.30
  -1  -1   4   33.90    2.30
   2   1  -4 1234.38   15.70
   2   1  -4 1229.18   14.50
  -2  -1   4 1236.18   15.10
  -2  -1   4 1250.97   15.90
   3   1  -4   14.70    1.80
   3   1  -4   12.60    1.60
  -3  -1   4   15.70    1.70
  -3  -1   4   13.70    2.00
   4   1  -4 1044.10   15.10
   4   1  -4 1034.30   14.00
  -4  -1   4 1038.50   15.40
  -4  -1   4 1049.70   13.10
   5   1  -4    4.20    1.90
   5   1  -4   10.00    2.00
  -5  -1   4    8.00    2.40
   6   1  -4    6.10    2.30
   6   1  -4    3.00    2.30
  -6  -1   4   -2.80    2.30
   7   1  -4   64.99    5.10
   7   1  -4   75.49    5.60
  -7  -1   4   77.99    5.90
   8   1  -4  444.46   11.80
   8   1  -4  422.06   11.80
  -8  -1   4  422.36   12.50
  -8   1  -3   22.80    5.10
   8  -1   3   20.70    4.20
   8  -1   3   26.60    4.30
  -7   1  -3  193.58    8.00
   7  -1   3  202.68    8.30
   7  -1   3  206.58    7.90
  -6   1  -3    8.30    2.80
   6  -1   3    1.80    2.50
   6  -1   3   -0.10    2.20
  -5   1  -3  700.13   12.80
   5  -1   3  721.33   12.70
   5  -1   3  716.03   12.40
  -4   1  -3   68.69    3.70
   4  -1   3   63.39    2.80
   4  -1   3   64.99    3.50
  -3   1  -3   48.10    2.70
   3  -1   3   49.60    2.50
  -2   1  -3   43.60    2.30
   2  -1   3   42.60    2.30
  -1   1  -3 2518.95   25.90
   1  -1   3 2483.75   26.60
   1  -1   3 2487.95   26.20
   0  -1   3    0.80    0.90
   0  -1   3    1.30    0.80
   1   1  -3 1520.65   16.70
   1   1  -3 1556.34   17.70
  -1  -1   3 1571.94   17.60
  -1  -1   3 1573.34   17.40
   2   1  -3   16.70    1.60
   2   1  -3   18.80    1.50
  -2  -1   3   20.90    1.90
  -2  -1   3   21.80    1.60
   3   1  -3   79.39    3.00
   3   1  -3   81.69    3.30
  -3  -1   3   82.29    2.60
  -3  -1   3   83.59    3.40
   4   1  -3  729.33   10.90
   4   1  -3  737.93   11.50
  -4  -1   3  733.63   11.70
   5   1  -3 1019.20   14.70
   5   1  -3 1013.70   15.20
  -5  -1   3 1003.80   15.60
   6   1  -3   74.69    4.70
   6   1  -3   64.69    4.50
  -6  -1   3   66.49    4.80
   7   1  -3  617.94   12.80
   7   1  -3  641.04   13.10
  -7  -1   3  648.14   13.70
   8   1  -3  249.28    9.30
   8   1  -3  238.88    9.00
   9   1  -3  106.09    7.60
  -8   1  -2  265.47    9.90
   8  -1   2  255.57    9.90
   8  -1   2  240.48    9.10
  -7   1  -2    9.70    3.30
   7  -1   2    6.50    2.80
   7  -1   2    5.80    3.20
  -6   1  -2  336.57    8.90
   6  -1   2  320.57    8.50
   6  -1   2  317.37    8.70
  -5   1  -2   37.30    3.30
   5  -1   2   38.10    3.20
   5  -1   2   40.40    3.40
  -4   1  -2 1488.15   19.30
   4  -1   2 1534.55   19.20
  -3   1  -2  526.35    8.40
   3  -1   2  516.45    8.30
   3  -1   2  519.65    7.20
  -2   1  -2 1454.85   16.60
   2  -1   2 1442.26   15.90
  -1   1  -2   42.80    1.70
   1  -1   2   36.80    1.80
   0   1  -2   17.70    1.10
   0   1  -2   16.00    1.20
   0  -1   2   19.80    1.40
   1   1  -2  728.73    9.00
   1   1  -2  708.63    8.50
  -1  -1   2  737.23    8.90
  -1  -1   2  727.63    8.70
   2   1  -2 3376.26   34.80
   2   1  -2 3382.46   34.30
  -2  -1   2 3428.86   33.80
  -2  -1   2 3382.26   34.90
   3   1  -2  613.04    8.80
   3   1  -2  624.94    9.10
  -3  -1   2  614.64    9.30
   4   1  -2 3059.39   33.50
   4   1  -2 3054.39   33.20
  -4  -1   2 3019.70   33.70
   5   1  -2  593.64   10.40
   5   1  -2  595.44   10.40
  -5  -1   2  578.04   10.70
   6   1  -2  144.49    5.80
  -6  -1   2  152.18    6.10
   7   1  -2   55.59    4.50
   7   1  -2   49.30    4.40
   8   1  -2  413.46   11.20
   8   1  -2  404.06   11.40
   9   1  -2   24.20    4.50
   9   1  -2   19.80    5.00
  -8   1  -1   54.09    5.20
   8  -1   1   60.19    5.20
   8  -1   1   64.59    5.70
  -7   1  -1  488.85   11.60
   7  -1   1  491.95   11.20
   7  -1   1  487.75   11.50
  -6   1  -1  481.65   10.50
   6  -1   1  502.45   10.50
   6  -1   1  504.15   10.70
  -5   1  -1 1117.79   16.20
   5  -1   1 1122.09   16.30
   5  -1   1 1120.99   16.10
  -4   1  -1    8.50    1.70
   4  -1   1   10.00    1.70
  -3   1  -1   17.00    1.70
   3  -1   1   20.30    1.70
  -2   1  -1  164.48    3.50
   2  -1   1  162.58    2.80
  -1   1  -1 6032.20   58.29
   1  -1   1 6025.90   57.89
   0   1  -1 5680.13   54.89
   0  -1   1 5584.14   55.59
   1   1  -1 6172.08   60.99
   1   1  -1 6197.98   60.19
  -1  -1   1 6149.69   59.29
  -1  -1   1 6227.88   59.59
   2   1  -1   46.50    2.10
   2   1  -1   48.40    2.00
  -2  -1   1   47.20    2.10
  -2  -1   1   50.59    1.50
   3   1  -1    1.80    1.20
   3   1  -1    3.70    1.10
  -3  -1   1    2.10    1.20
   4   1  -1   89.19    3.60
   4   1  -1   95.99    3.50
  -4  -1   1   96.49    3.80
   5   1  -1  528.05    9.80
   5   1  -1  535.25    9.60
   6   1  -1    2.80    2.10
   6   1  -1   -0.60    1.80
   7   1  -1  374.66    9.60
   7   1  -1  365.86    9.80
   8   1  -1   71.49    5.60
   8   1  -1   66.59    5.60
   9   1  -1   88.59    7.00
   9   1  -1   81.09    7.10
  -8   1   0  511.55   12.70
   8  -1   0  543.25   12.80
   8  -1   0  540.25   13.20
  -7   1   0   77.49    5.20
   7  -1   0   79.69    5.60
   7  -1   0   64.09    5.10
  -6   1   0   88.19    4.60
   6  -1   0   91.59    4.80
   6  -1   0   83.19    4.80
  -5   1   0   46.80    3.30
   5  -1   0   51.99    3.40
   5  -1   0   53.29    3.60
  -4   1   0 1959.70   22.80
   4  -1   0 1962.80   22.80
   4  -1   0 1893.61   22.60
  -3   1   0 1080.59   13.20
  -3   1   0 1118.39   13.70
   3  -1   0 1093.49   13.70
  -2   1   0 1367.26   15.10
  -2   1   0 1350.46   14.60
  -2   1   0 1331.97   14.50
   2  -1   0 1375.56   15.20
  -1   1   0 1848.52   18.40
  -1   1   0 1854.71   18.80
   1  -1   0 1850.31   18.80
   0   1   0    1.50    0.40
   0   1   0    1.20    0.40
   0  -1   0    1.20    0.40
   1   1   0 1830.92   18.30
   1   1   0 1867.21   18.70
  -1  -1   0 1820.52   18.30
   2   1   0 1375.36   14.90
   2   1   0 1385.46   15.30
  -2  -1   0 1358.06   14.10
   3   1   0 1099.29   13.30
   3   1   0 1083.89   13.60
  -3  -1   0 1115.69   13.70
   4   1   0 1933.01   23.00
   4   1   0 1979.00   22.70
  -4  -1   0 1993.90   23.20
   5   1   0   45.30    3.30
   5   1   0   45.70    3.20
  -5  -1   0   57.99    3.40
   6   1   0   86.99    4.90
   6   1   0   86.49    4.60
   7   1   0   79.09    5.50
   7   1   0   79.09    5.40
   8   1   0  546.85   12.70
   8   1   0  549.65   13.40
  -9   1   1   67.79    6.00
   9  -1  -1   87.99    7.10
   9  -1  -1   74.19    6.70
  -8   1   1   71.99    5.80
   8  -1  -1   64.79    5.40
   8  -1  -1   55.99    5.30
  -7   1   1  384.66    9.70
   7  -1  -1  394.26    9.90
   7  -1  -1  383.06    9.90
  -6   1   1    1.30    1.90
  -6   1   1   -2.70    2.10
   6  -1  -1   -0.60    1.90
   6  -1  -1    0.40    2.00
  -5   1   1  538.45    9.80
  -5   1   1  544.95    9.70
   5  -1  -1  541.45    9.90
   5  -1  -1  533.95    9.70
  -4   1   1   92.69    3.60
  -4   1   1   93.29    3.40
   4  -1  -1   88.59    3.50
   4  -1  -1   90.69    3.50
  -3   1   1    1.60    1.10
  -3   1   1    2.70    1.00
  -3   1   1    3.10    1.00
   3  -1  -1    3.90    1.10
   3  -1  -1    1.60    1.10
  -2   1   1   47.90    2.10
  -2   1   1   50.69    1.90
  -2   1   1   49.40    1.80
   2  -1  -1   51.69    2.00
  -1   1   1 6165.68   58.49
  -1   1   1 6110.69   58.99
  -1   1   1 6078.79   58.69
   1  -1  -1 6131.59   60.79
   0   1   1 5807.62   56.19
   0   1   1 5860.11   55.79
   1   1   1 6175.78   58.39
   1   1   1 6087.29   58.89
   2   1   1  170.28    3.20
   2   1   1  163.88    3.50
  -2  -1  -1  167.58    3.60
   3   1   1   18.70    1.80
   3   1   1   22.20    1.70
  -3  -1  -1   20.50    1.90
   4   1   1    8.50    1.70
   4   1   1   11.50    1.60
  -4  -1  -1    9.80    1.70
   5   1   1 1157.08   15.70
   5   1   1 1123.09   16.20
  -5  -1  -1 1125.19   16.40
   6   1   1  516.85   10.30
  -6  -1  -1  501.35   10.80
   7   1   1  497.65   11.60
   7   1   1  495.15   11.00
   8   1   1   59.59    5.20
   8   1   1   57.79    5.70
   9  -1  -2   18.40    4.70
   9  -1  -2   20.00    4.30
  -8   1   2  363.96   10.40
   8  -1  -2  392.06   11.10
   8  -1  -2  401.06   11.10
  -7   1   2   50.89    4.60
  -7   1   2   42.30    4.00
   7  -1  -2   50.89    4.30
   7  -1  -2   62.29    4.80
  -6   1   2  141.99    5.40
  -6   1   2  152.98    6.00
   6  -1  -2  142.29    5.70
   6  -1  -2  142.89    5.60
  -5   1   2  601.64   10.70
  -5   1   2  601.84   10.10
   5  -1  -2  590.14   10.50
   5  -1  -2  591.64   10.20
  -4   1   2 3014.10   33.20
  -4   1   2 3021.30   32.20
  -4   1   2 3039.80   32.10
   4  -1  -2 2920.41   32.30
   4  -1  -2 3017.80   33.10
  -3   1   2  626.64    8.40
  -3   1   2  612.44    9.20
  -3   1   2  603.64    8.40
   3  -1  -2  602.74    8.40
   3  -1  -2  635.34    9.10
  -2   1   2 3432.56   35.00
  -2   1   2 3400.76   34.10
   2  -1  -2 3336.47   33.60
   2  -1  -2 3389.76   34.50
  -1   1   2  712.43    9.00
  -1   1   2  721.43    8.40
   1  -1  -2  698.33    8.20
   0   1   2   18.70    1.30
   0   1   2   16.90    1.40
   0  -1  -2   15.70    1.00
   1   1   2   42.00    1.60
   1   1   2   40.00    1.80
   2   1   2 1439.66   15.80
   2   1   2 1447.76   16.30
  -2  -1  -2 1475.65   16.60
   3   1   2  525.95    8.30
   3   1   2  543.45    7.90
  -3  -1  -2  539.35    8.60
   4   1   2 1525.15   18.50
   4   1   2 1492.65   19.00
  -4  -1  -2 1520.75   19.40
   5   1   2   45.20    3.70
   5   1   2   52.09    3.40
  -5  -1  -2   48.30    3.60
   6   1   2  327.37    8.10
   6   1   2  327.07    8.70
  -6  -1  -2  335.97    9.00
   7   1   2    9.50    3.10
   7   1   2    8.30    2.80
   8   1   2  273.37   10.10
   8   1   2  242.58    8.90
   9  -1  -3  106.39    7.80
  -8   1   3  246.68    9.60
  -8   1   3  245.28    8.60
   8  -1  -3  257.27    9.10
   8  -1  -3  244.78    9.00
  -7   1   3  609.24   12.00
  -7   1   3  627.34   13.20
   7  -1  -3  605.14   12.40
   7  -1  -3  610.24   12.80
  -6   1   3   65.99    4.90
  -6   1   3   69.59    4.00
   6  -1  -3   64.29    4.50
   6  -1  -3   70.29    4.40
  -5   1   3 1008.80   15.50
  -5   1   3 1026.70   14.10
  -5   1   3 1033.50   14.10
   5  -1  -3 1012.80   14.40
   5  -1  -3 1020.70   15.20
  -4   1   3  714.03   10.30
  -4   1   3  723.33   11.60
  -4   1   3  743.23   10.10
   4  -1  -3  708.43   10.30
   4  -1  -3  702.73   11.10
  -3   1   3   84.69    2.90
  -3   1   3   83.19    3.50
   3  -1  -3   81.79    2.60
   3  -1  -3   81.09    3.10
  -2   1   3   18.10    1.90
  -2   1   3   21.30    1.60
   2  -1  -3   18.80    1.60
  -1   1   3 1568.14   16.80
  -1   1   3 1565.44   18.00
   1  -1  -3 1518.35   16.80
   0   1   3    2.90    1.10
   0   1   3    1.70    0.80
   1   1   3 2475.75   25.90
   1   1   3 2506.05   27.20
   2   1   3   46.10    2.20
   2   1   3   44.60    2.20
  -2  -1  -3   41.50    2.10
   3   1   3   50.49    2.50
   3   1   3   52.79    2.80
  -3  -1  -3   47.70    2.80
   4   1   3   60.49    3.40
   4   1   3   58.39    3.10
  -4  -1  -3   63.39    3.60
   5   1   3  724.13   11.80
   5   1   3  712.33   12.50
  -5  -1  -3  724.23   12.80
   6   1   3    5.20    2.90
   6   1   3    6.70    2.40
   7   1   3  221.88    8.30
   7   1   3  195.58    7.30
   8   1   3   28.40    4.80
  -8   1   4  432.06   12.30
   8  -1  -4  427.76   11.40
   8  -1  -4  429.66   11.90
  -7   1   4   75.39    5.90
   7  -1  -4   59.59    4.90
   7  -1  -4   72.49    5.40
  -6   1   4    5.20    2.70
  -6   1   4    1.50    1.90
   6  -1  -4    4.90    2.50
   6  -1  -4    6.60    2.30
  -5   1   4    5.90    2.20
  -5   1   4    8.50    2.00
  -5   1   4    6.40    1.80
   5  -1  -4    9.40    2.20
   5  -1  -4    8.70    1.90
  -4   1   4 1055.39   15.50
  -4   1   4 1031.60   13.70
  -4   1   4 1013.50   12.50
   4  -1  -4 1050.99   13.40
   4  -1  -4 1036.70   14.80
  -3   1   4   21.00    2.40
  -3   1   4   13.10    1.60
   3  -1  -4   14.30    1.80
   3  -1  -4   11.60    1.30
  -2   1   4 1211.58   14.30
  -2   1   4 1227.58   16.00
   2  -1  -4 1220.28   14.90
  -1   1   4   30.10    2.40
  -1   1   4   33.10    1.90
   1  -1  -4   31.00    1.90
   0   1   4    3.10    1.00
   0   1   4    1.90    1.30
   1   1   4  462.85    8.30
   1   1   4  466.15    7.00
   2   1   4  885.11   11.60
   2   1   4  866.21   12.90
   2   1   4  845.62   11.00
   3   1   4   88.09    3.60
   3   1   4   93.59    3.40
   3   1   4   92.79    3.50
  -3  -1  -4   93.09    3.70
   4   1   4  840.62   12.90
   4   1   4  820.02   12.50
   4   1   4  839.32   12.50
  -4  -1  -4  856.71   13.40
   5   1   4  294.57    7.80
   5   1   4  293.47    7.30
   6   1   4  239.88    7.90
   6   1   4  214.28    7.20
   7   1   4  110.29    6.70
  -8   1   5    7.60    3.90
   8  -1  -5    7.90    3.80
  -7   1   5  358.96   10.70
   7  -1  -5  386.46   10.60
  -6   1   5  185.38    7.50
   6  -1  -5  174.48    6.90
   6  -1  -5  148.89    7.30
  -5   1   5  474.35   10.70
  -5   1   5  471.35    8.80
   5  -1  -5  460.75    9.60
   5  -1  -5  487.85   10.20
  -4   1   5   41.10    2.90
  -4   1   5   40.40    3.60
  -4   1   5   42.30    2.80
   4  -1  -5   43.10    3.40
   4  -1  -5   43.80    3.30
  -3   1   5    1.60    1.40
  -3   1   5    1.90    1.80
   3  -1  -5    2.90    1.40
  -2   1   5   13.70    2.10
  -2   1   5   18.20    1.80
   2  -1  -5   17.30    1.90
  -1   1   5 1002.20   14.40
  -1   1   5 1001.70   12.50
   1  -1  -5  989.90   13.00
   0   1   5  823.12   10.80
   0   1   5  825.82   12.70
   1   1   5 1764.62   20.20
   1   1   5 1778.52   22.30
   2   1   5  310.07    6.10
   2   1   5  300.17    5.70
   2   1   5  308.87    7.40
   3   1   5  122.39    5.20
   3   1   5  116.09    4.30
   3   1   5  120.59    4.20
   4   1   5   10.20    2.10
   4   1   5   10.40    2.50
   4   1   5   13.60    2.30
   4   1   5   13.80    2.30
   5   1   5  399.46    9.50
   5   1   5  387.66    8.90
   6   1   5    4.90    2.80
   6   1   5    4.40    2.90
  -7   1   6    0.10    3.50
   7  -1  -6    0.20    2.90
  -6   1   6    3.30    2.40
  -6   1   6    1.40    2.90
   6  -1  -6    1.00    2.50
  -5   1   6   13.80    3.20
  -5   1   6   12.40    2.40
   5  -1  -6   14.80    2.90
  -4   1   6  724.63   11.30
  -4   1   6  718.23   13.60
  -4   1   6  714.33   11.10
   4  -1  -6  718.33   12.50
  -3   1   6  702.43   11.40
  -3   1   6  671.93   10.40
  -3   1   6  723.83   12.90
   3  -1  -6  702.03   11.60
  -2   1   6 1040.60   16.10
   2  -1  -6 1055.39   14.60
  -1   1   6    1.50    1.70
   1  -1  -6    3.50    1.50
   0   1   6   21.70    2.80
   0   1   6   24.30    2.10
   1   1   6  193.98    4.80
   1   1   6  199.28    6.40
   2   1   6  207.18    5.30
   2   1   6  221.38    6.90
   3   1   6   38.60    3.00
   3   1   6   40.90    3.90
   4   1   6  249.18    6.90
   4   1   6  252.67    8.10
   5   1   6    7.80    3.20
   5   1   6    4.90    2.80
   6   1   6  113.19    6.80
   6   1   6  133.39    6.50
  -7   1   7  198.88    9.60
   7  -1  -7  198.08    8.70
  -6   1   7   41.00    3.80
  -6   1   7   48.40    5.20
   6  -1  -7   52.89    5.00
  -5   1   7  281.07    9.40
   5  -1  -7  288.97    8.60
  -4   1   7    8.20    2.10
  -4   1   7    7.10    2.40
  -4   1   7    7.50    3.00
   4  -1  -7    3.90    2.30
  -3   1   7    7.10    2.40
  -3   1   7    2.60    2.60
   3  -1  -7    3.80    2.00
  -2   1   7  126.19    5.60
  -2   1   7  132.99    6.00
   2  -1  -7  125.69    4.90
  -1   1   7  224.98    7.30
   0   1   7  250.27    7.60
   1   1   7  586.94    9.60
   1   1   7  596.04   12.00
   2   1   7  109.99    4.40
   2   1   7  108.99    5.80
   3   1   7   40.40    4.30
   3   1   7   38.00    4.20
   4   1   7   -5.30    2.60
   4   1   7   -1.00    2.70
   5   1   7  250.07    8.70
  -6   1   8    5.60    3.60
   6  -1  -8    1.30    3.30
  -5   1   8   33.00    4.70
   5  -1  -8   30.50    4.10
  -4   1   8  299.57    8.30
  -4   1   8  287.97    9.80
   4  -1  -8  290.17    8.50
  -3   1   8  128.89    6.80
  -3   1   8  128.69    6.10
   3  -1  -8  121.59    5.70
  -2   1   8  494.75   11.80
  -2   1   8  498.05   11.10
  -1   1   8   17.10    3.40
  -1   1   8   16.30    3.20
   0   1   8    0.00    2.30
   0   1   8   -3.90    2.40
   1   1   8    3.90    2.70
   1   1   8   -1.90    2.60
   2   1   8  197.38    8.00
   2   1   8  210.08    8.00
   3   1   8  229.58    8.90
   3   1   8  226.48    8.50
  -4   1   9   84.09    6.10
  -4   1   9   80.19    7.00
  -3   1   9   -1.90    2.90
  -3   1   9   -0.30    3.20
  -2   1   9   -3.90    2.90
  -2   1   9   -0.40    3.10
  -1   1   9   72.29    6.10
  -1   1   9   78.09    6.00
   0   1   9   54.39    5.00
   0   1   9   57.99    5.60
   1   1   9  287.07    9.60
   1   1   9  269.57    9.60
   1  -2   9    3.60    3.10
   0  -2   9    7.20    3.10
  -1  -2   9   36.50    4.50
  -2  -2   9   28.90    4.20
  -2  -2   9   29.80    4.10
  -3  -2   9  650.93   14.30
  -3  -2   9  639.14   13.70
   4   2  -9   -2.50    2.80
  -4  -2   9    2.00    3.50
  -4  -2   9   -3.10    3.00
   3  -2   8   54.09    4.90
   2  -2   8  445.56   11.20
   1  -2   8   11.40    3.20
   0  -2   8  286.57    8.90
   0  -2   8  294.87    8.80
  -1  -2   8   41.60    4.00
  -1  -2   8   47.10    4.30
  -2  -2   8   34.70    3.90
  -2  -2   8   38.40    4.10
   3   2  -8    2.70    2.50
  -3  -2   8    3.80    2.70
  -3  -2   8    6.00    2.90
   4   2  -8    4.00    2.80
  -4  -2   8   -0.30    2.80
  -4  -2   8   -1.80    2.50
   5   2  -8  424.66   11.50
  -5  -2   8  418.26   11.60
   6   2  -8  146.89    8.30
  -6  -2   8  154.68    8.10
   4  -2   7   48.70    4.30
   3  -2   7   25.60    3.40
   2  -2   7  245.98    7.60
   1  -2   7  247.08    7.50
   1  -2   7  237.98    6.70
   0  -2   7  123.89    5.10
   0  -2   7  124.79    5.50
  -1  -2   7  135.39    5.70
  -1  -2   7  138.69    5.50
   2   2  -7  510.05   10.70
  -2  -2   7  504.85   10.50
  -2  -2   7  512.15   10.60
   3   2  -7  268.27    8.00
  -3  -2   7  269.87    7.60
  -3  -2   7  271.87    8.10
   4   2  -7  127.59    6.10
  -4  -2   7  118.39    5.60
  -4  -2   7  121.69    6.20
   5   2  -7   62.79    5.30
  -5  -2   7   69.39    5.60
   6   2  -7  111.09    6.80
  -6  -2   7  115.99    7.00
   7   2  -7  218.68    9.60
  -7  -2   7  211.58    9.60
  -5   2  -6  220.08    8.50
   5  -2   6  231.98    8.00
  -4   2  -6   54.49    4.50
   4  -2   6   50.69    4.00
   3  -2   6  104.29    5.10
   2  -2   6  537.55   10.50
   1  -2   6  164.88    5.60
   0  -2   6  482.65    9.50
   0  -2   6  473.05    8.80
  -1  -2   6  382.36    8.30
  -1  -2   6  372.26    7.90
   2   2  -6   38.90    3.30
   2   2  -6   35.60    2.80
  -2  -2   6   43.10    3.50
  -2  -2   6   40.50    3.30
   3   2  -6  127.99    4.40
   3   2  -6  138.29    5.50
  -3  -2   6  131.29    5.00
  -3  -2   6  135.09    5.40
   4   2  -6  421.16    8.50
   4   2  -6  412.86    9.70
  -4  -2   6  426.36    8.70
  -4  -2   6  441.86   10.00
   5   2  -6  299.27    8.70
   5   2  -6  280.97    7.50
  -5  -2   6  297.67    8.90
  -5  -2   6  290.67    8.90
   6   2  -6  171.48    7.60
   6   2  -6  180.88    7.10
  -6  -2   6  178.48    7.60
   7   2  -6    2.00    5.00
   7   2  -6    0.60    3.20
  -7  -2   6    5.10    3.50
  -6   2  -5    8.70    3.40
   6  -2   5   15.50    3.60
   6  -2   5   10.60    3.30
  -5   2  -5  301.27    8.80
   5  -2   5  317.27    8.80
  -4   2  -5   33.10    3.40
   4  -2   5   31.40    2.90
  -3   2  -5  729.63   11.90
   3  -2   5  740.13   11.90
  -2   2  -5  419.86    7.70
   2  -2   5  431.06    8.40
  -1   2  -5   19.80    1.80
   1  -2   5   20.00    2.30
   0  -2   5   16.90    2.10
   0  -2   5   23.80    2.10
   1   2  -5  103.69    4.00
   1   2  -5   98.99    3.40
  -1  -2   5   95.99    3.70
  -1  -2   5  101.69    4.00
   2   2  -5  615.74    9.40
   2   2  -5  630.54   10.70
  -2  -2   5  643.04   10.50
  -2  -2   5  624.14   10.10
   3   2  -5 1165.78   15.40
   3   2  -5 1179.28   16.70
  -3  -2   5 1153.28   15.60
  -3  -2   5 1168.38   16.60
   4   2  -5    9.10    2.00
   4   2  -5    9.50    2.20
  -4  -2   5    6.70    2.30
  -4  -2   5    7.90    1.90
   5   2  -5  582.44   11.60
   5   2  -5  593.04   10.80
  -5  -2   5  566.04   10.20
  -5  -2   5  564.54   11.70
   6   2  -5   14.30    3.00
   6   2  -5   12.60    2.90
  -6  -2   5   18.50    3.50
   7   2  -5  163.78    7.40
   7   2  -5  143.59    7.30
  -7  -2   5  171.88    8.00
   8   2  -5  334.77   10.70
   8   2  -5  317.67   10.70
  -8  -2   5  337.77   11.50
  -7   2  -4   41.30    5.00
   7  -2   4   41.10    4.50
   7  -2   4   36.80    4.60
  -6   2  -4  549.85   12.60
   6  -2   4  565.24   12.50
   6  -2   4  539.35   12.10
  -5   2  -4  208.08    7.10
   5  -2   4  226.38    7.20
  -4   2  -4   49.99    3.80
   4  -2   4   48.30    3.20
  -3   2  -4  338.37    7.20
   3  -2   4  335.17    6.80
  -2   2  -4   60.09    2.80
   2  -2   4   58.09    3.00
  -1   2  -4  468.75    7.20
   1  -2   4  453.35    7.90
   0  -2   4 2860.31   31.20
   1   2  -4  405.66    7.40
   1   2  -4  413.66    6.70
  -1  -2   4  407.26    6.90
  -1  -2   4  407.16    7.20
   2   2  -4    3.60    1.30
   2   2  -4    1.60    1.10
  -2  -2   4    3.60    1.40
  -2  -2   4    2.40    1.20
   3   2  -4   77.19    3.30
   3   2  -4   73.69    3.60
  -3  -2   4   79.69    3.70
  -3  -2   4   84.59    3.20
   4   2  -4   23.80    2.50
   4   2  -4   23.60    2.60
  -4  -2   4   24.80    2.10
  -4  -2   4   29.40    2.90
   5   2  -4 1098.29   16.70
   5   2  -4 1081.69   15.90
  -5  -2   4 1086.29   16.90
   6   2  -4  290.47    8.10
   6   2  -4  299.97    8.40
  -6  -2   4  284.27    8.60
   7   2  -4  190.08    7.50
   7   2  -4  197.48    7.80
  -7  -2   4  170.78    8.00
   8   2  -4  173.08    8.20
   8   2  -4  199.08    8.50
  -8  -2   4  189.58    9.00
  -7   2  -3   33.90    4.50
   7  -2   3   36.20    4.50
   7  -2   3   30.50    4.10
  -6   2  -3  250.27    8.10
   6  -2   3  235.18    7.80
   6  -2   3  243.58    8.10
  -5   2  -3  314.27    8.20
   5  -2   3  319.97    8.20
  -4   2  -3  315.27    7.30
   4  -2   3  299.77    7.30
   4  -2   3  298.37    5.90
  -3   2  -3  728.83   11.20
   3  -2   3  745.93   10.30
  -2   2  -3 1841.92   21.10
   2  -2   3 1813.82   20.70
  -1   2  -3  150.48    3.50
   1  -2   3  148.59    3.80
   0   2  -3   -0.40    0.80
   0   2  -3   -1.20    0.60
   0  -2   3   -0.60    0.90
   1   2  -3   22.20    1.70
   1   2  -3   21.90    1.80
  -1  -2   3   24.70    1.90
  -1  -2   3   20.70    1.80
   2   2  -3 1349.27   16.00
   2   2  -3 1372.66   16.60
  -2  -2   3 1368.06   16.30
  -2  -2   3 1352.16   15.90
   3   2  -3 3610.44   38.20
   3   2  -3 3629.84   38.70
  -3  -2   3 3621.74   38.70
  -3  -2   3 3624.84   37.30
   4   2  -3  142.19    4.70
   4   2  -3  146.89    4.70
  -4  -2   3  150.48    5.00
  -4  -2   3  140.99    3.70
   5   2  -3   80.29    4.20
   5   2  -3   83.79    4.20
  -5  -2   3   79.89    4.60
   6   2  -3  246.98    7.50
   6   2  -3  250.77    7.50
  -6  -2   3  254.97    7.90
   7   2  -3   95.99    6.00
   7   2  -3  103.09    6.30
  -7  -2   3  107.99    6.40
   8   2  -3  103.69    7.30
   8   2  -3   97.39    6.80
  -8   2  -2  290.17   10.60
   8  -2   2  310.97   10.60
   8  -2   2  301.97   10.10
  -7   2  -2  217.78    8.40
   7  -2   2  215.28    8.30
   7  -2   2  215.88    8.00
  -6   2  -2   83.19    5.10
   6  -2   2   83.29    5.10
   6  -2   2   70.09    5.10
  -5   2  -2  983.90   15.40
   5  -2   2  980.90   15.20
  -4   2  -2  200.98    5.70
   4  -2   2  194.48    5.50
  -3   2  -2   94.99    3.50
   3  -2   2   92.09    2.70
  -2   2  -2 1395.36   16.60
   2  -2   2 1420.16   15.80
  -1   2  -2    6.90    1.10
   1  -2   2    7.60    1.10
   0   2  -2 9796.72   95.59
   0  -2   2 9858.21   96.69
   1   2  -2  194.38    4.00
   1   2  -2  198.18    3.90
  -1  -2   2  190.38    3.60
  -1  -2   2  197.88    3.90
   2   2  -2   16.60    1.50
   2   2  -2   16.70    1.60
  -2  -2   2   20.10    1.50
  -2  -2   2   19.50    1.70
   3   2  -2  201.78    4.80
   3   2  -2  206.78    4.80
  -3  -2   2  205.48    4.90
  -3  -2   2  207.18    4.00
   4   2  -2   22.70    2.30
   4   2  -2   24.80    2.30
  -4  -2   2   23.30    2.40
  -4  -2   2   24.30    1.90
   5   2  -2 1021.70   15.10
   5   2  -2  999.80   14.80
  -5  -2   2 1002.70   15.30
   6   2  -2  856.61   14.40
   6   2  -2  837.32   14.10
   7   2  -2   66.99    5.10
   7   2  -2   69.79    5.30
   8   2  -2  232.38    9.20
   8   2  -2  225.68    8.70
  -8   2  -1  117.09    7.20
   8  -2   1  125.69    7.80
   8  -2   1  117.99    7.20
  -7   2  -1  185.08    7.50
   7  -2   1  179.48    7.30
   7  -2   1  191.18    7.60
  -6   2  -1   86.79    4.90
   6  -2   1   81.69    4.90
   6  -2   1   79.89    5.00
  -5   2  -1 1667.43   22.10
   5  -2   1 1710.23   22.10
  -4   2  -1   25.80    2.40
   4  -2   1   22.60    2.30
  -3   2  -1 1135.19   14.60
   3  -2   1 1138.69   14.50
  -2   2  -1 1305.37   15.30
   2  -2   1 1295.07   14.00
  -1   2  -1 1596.04   17.40
   1  -2   1 1601.54   16.80
   0   2  -1  841.92   10.00
   0  -2   1  864.01    9.80
   1   2  -1    7.10    1.10
   1   2  -1    5.80    0.90
  -1  -2   1    7.60    1.00
  -1  -2   1    5.90    0.90
   2   2  -1 5159.08   50.89
   2   2  -1 5086.09   51.19
  -2  -2   1 5171.08   50.29
  -2  -2   1 5133.09   51.09
   3   2  -1 1205.48   15.00
   3   2  -1 1205.18   14.60
  -3  -2   1 1206.18   15.10
  -3  -2   1 1187.98   13.40
   4   2  -1  266.17    6.10
   4   2  -1  271.47    5.90
   5   2  -1  682.03   11.20
   5   2  -1  696.93   11.70
   6   2  -1  149.69    6.00
   6   2  -1  167.88    5.90
   7   2  -1   46.80    4.50
   7   2  -1   50.59    4.30
   8   2  -1  230.18    9.20
   8   2  -1  212.68    8.40
  -8   2   0  319.47   10.30
   8  -2   0  353.96   10.90
   8  -2   0  334.87   10.50
  -7   2   0  165.78    6.90
   7  -2   0  165.18    7.20
   7  -2   0  162.08    6.80
  -6   2   0  225.78    6.90
   6  -2   0  235.08    7.20
   6  -2   0  221.88    7.10
  -5   2   0  725.73   12.10
   5  -2   0  742.83   12.20
  -4   2   0 1123.19   15.10
  -4   2   0 1119.59   14.20
   4  -2   0 1112.59   15.10
  -3   2   0 1157.28   14.30
  -3   2   0 1128.79   13.50
  -3   2   0 1122.99   13.40
   3  -2   0 1154.18   14.40
  -2   2   0  761.32    9.20
  -2   2   0  772.92    9.90
   2  -2   0  776.42    9.80
  -1   2   0 2398.16   23.90
  -1   2   0 2385.26   24.50
   1  -2   0 2394.56   23.90
   0   2   0 1905.21   19.10
   0   2   0 1899.91   19.60
   0  -2   0 1927.81   19.50
   1   2   0 2369.76   23.80
   1   2   0 2395.96   24.40
   1   2   0 2372.26   23.70
  -1  -2   0 2393.96   24.20
   2   2   0  785.72    9.30
   2   2   0  785.62   10.00
  -2  -2   0  765.22    9.20
   3   2   0 1152.28   13.80
   3   2   0 1153.48   14.40
  -3  -2   0 1146.99   13.00
   4   2   0 1136.19   15.30
   4   2   0 1136.99   14.60
   5   2   0  728.73   12.20
   5   2   0  733.83   11.50
   6   2   0  228.58    6.80
   6   2   0  234.48    7.30
   7   2   0  167.48    7.30
   7   2   0  171.18    6.80
   8   2   0  366.46   10.40
   8   2   0  365.66   11.20
  -8   2   1  205.58    8.20
   8  -2  -1  219.08    8.70
   8  -2  -1  218.98    8.80
  -7   2   1   60.59    4.80
   7  -2  -1   50.99    4.40
   7  -2  -1   54.99    4.60
  -6   2   1  157.68    5.80
  -6   2   1  154.18    5.60
   6  -2  -1  150.28    5.90
   6  -2  -1  158.68    6.00
  -5   2   1  686.63   11.30
  -5   2   1  674.83   11.10
   5  -2  -1  682.43   11.50
   5  -2  -1  673.03   11.30
  -4   2   1  258.67    5.50
  -4   2   1  261.07    5.70
  -4   2   1  265.17    5.80
   4  -2  -1  262.97    6.00
  -3   2   1 1184.38   14.40
  -3   2   1 1174.18   14.30
  -3   2   1 1182.48   14.10
   3  -2  -1 1206.08   14.70
  -2   2   1 5032.40   49.90
  -2   2   1 5082.09   50.09
  -2   2   1 5053.49   49.99
   2  -2  -1 5109.69   50.19
  -1   2   1    8.10    1.00
  -1   2   1    6.00    0.90
  -1   2   1    5.70    0.90
   1  -2  -1    5.00    0.70
   1  -2  -1    7.70    0.90
   0   2   1  841.72    9.50
   0   2   1  824.42    9.10
   0   2   1  848.32    9.80
   0  -2  -1  836.32    9.70
   1   2   1 1569.94   16.60
   1   2   1 1589.24   16.80
  -1  -2  -1 1602.54   17.00
   2   2   1 1312.77   14.90
   2   2   1 1292.47   14.00
  -2  -2  -1 1301.17   14.60
   3   2   1 1176.38   14.60
   3   2   1 1162.68   13.70
   4   2   1   28.00    2.30
   4   2   1   21.70    2.30
   5   2   1 1764.72   22.70
   5   2   1 1763.42   21.70
   6   2   1   78.89    5.10
   6   2   1   84.99    4.70
   7   2   1  186.38    7.70
   7   2   1  200.18    7.10
   8   2   1  128.89    7.80
   8   2   1  123.49    7.00
  -8   2   2  220.08    8.30
   8  -2  -2  216.68    8.60
   8  -2  -2  230.18    8.70
  -7   2   2   65.59    5.60
  -7   2   2   66.99    4.90
   7  -2  -2   74.19    5.40
   7  -2  -2   68.99    5.10
  -6   2   2  852.01   13.90
  -6   2   2  845.22   14.20
   6  -2  -2  829.62   13.80
  -5   2   2 1002.60   14.00
  -5   2   2 1017.40   14.40
  -5   2   2 1009.60   14.80
   5  -2  -2 1018.40   15.00
   5  -2  -2  976.30   14.30
  -4   2   2   19.20    1.90
  -4   2   2   24.80    2.10
  -4   2   2   24.30    2.30
   4  -2  -2   25.60    2.10
   4  -2  -2   21.10    2.10
  -3   2   2  209.38    4.30
  -3   2   2  204.98    4.40
  -3   2   2  203.48    4.80
   3  -2  -2  201.48    4.60
  -2   2   2   19.40    1.60
  -2   2   2   18.10    1.40
  -2   2   2   15.70    1.60
   2  -2  -2   19.40    1.50
  -1   2   2  196.98    4.10
  -1   2   2  193.98    3.70
   1  -2  -2  196.48    3.20
   0   2   2 9904.41   95.59
   0   2   2 9840.42   94.79
   1   2   2    5.30    0.90
   1   2   2    7.00    1.10
   2   2   2 1404.56   15.00
   2   2   2 1417.86   16.20
   2   2   2 1424.16   16.00
   3   2   2   96.59    3.30
   3   2   2   99.19    2.90
   4   2   2  203.38    4.80
   4   2   2  204.48    5.50
   5   2   2  966.20   13.90
   5   2   2  989.30   15.10
   6   2   2   97.09    5.50
   6   2   2   83.79    4.60
   7   2   2  223.68    8.40
   7   2   2  218.98    7.50
   8   2   2  316.57   10.80
  -8   2   3   92.39    6.00
  -8   2   3   98.29    7.20
   8  -2  -3  108.29    6.90
   8  -2  -3  108.49    6.80
  -7   2   3  109.89    5.60
  -7   2   3  102.49    6.20
   7  -2  -3  108.39    5.90
   7  -2  -3  114.69    6.30
  -6   2   3  250.47    6.90
  -6   2   3  253.37    7.60
   6  -2  -3  244.68    7.50
   6  -2  -3  241.78    7.00
  -5   2   3   82.09    3.70
  -5   2   3   80.29    3.80
  -5   2   3   77.79    4.40
   5  -2  -3   84.69    3.90
   5  -2  -3   82.59    4.10
  -4   2   3  137.09    4.20
  -4   2   3  146.69    4.00
  -4   2   3  139.19    4.90
   4  -2  -3  137.89    4.50
   4  -2  -3  147.19    4.10
  -3   2   3 3600.64   37.20
  -3   2   3 3579.84   38.40
   3  -2  -3 3574.54   37.60
   3  -2  -3 3512.15   36.20
  -2   2   3 1348.67   15.60
  -2   2   3 1343.77   16.60
   2  -2  -3 1345.17   15.50
  -1   2   3   22.40    1.70
  -1   2   3   25.00    2.10
   1  -2  -3   21.60    1.40
   0   2   3    0.00    0.90
   0   2   3    0.50    1.10
   1   2   3  154.88    3.70
   1   2   3  157.48    4.30
   2   2   3 1818.52   20.40
   2   2   3 1783.42   19.80
   3   2   3  737.93   10.50
   3   2   3  725.03    9.70
   3   2   3  733.03   10.70
   4   2   3  299.87    6.70
   4   2   3  291.57    6.10
   5   2   3  334.87    8.10
   5   2   3  320.87    7.00
   6   2   3  224.18    7.70
   6   2   3  220.38    6.60
   7   2   3   38.50    4.50
  -8   2   4  206.98    9.10
   8  -2  -4  183.08    8.40
   8  -2  -4  203.68    8.40
  -7   2   4  191.88    6.70
  -7   2   4  196.38    8.10
   7  -2  -4  197.68    7.70
   7  -2  -4  201.48    7.30
  -6   2   4  292.27    7.10
  -6   2   4  289.87    7.40
  -6   2   4  270.97    8.40
   6  -2  -4  278.37    7.30
   6  -2  -4  268.07    8.00
  -5   2   4 1063.09   16.60
  -5   2   4 1085.09   15.10
   5  -2  -4 1050.39   14.60
   5  -2  -4 1065.29   16.10
  -4   2   4   24.60    2.90
  -4   2   4   24.50    2.30
   4  -2  -4   27.90    2.30
   4  -2  -4   28.00    2.60
  -3   2   4   74.79    3.80
  -3   2   4   73.89    3.10
   3  -2  -4   78.29    3.30
  -2   2   4    4.50    1.30
  -2   2   4    3.30    1.50
   2  -2  -4    3.80    1.10
  -1   2   4  406.86    7.70
  -1   2   4  398.26    6.60
   1  -2  -4  395.46    6.00
   0   2   4 2847.71   30.40
   0   2   4 2915.31   32.30
   1   2   4  475.45    8.70
   1   2   4  488.95    7.70
   2   2   4   62.99    3.40
   2   2   4   50.99    2.40
   2   2   4   60.89    3.00
   3   2   4  339.37    6.90
   3   2   4  335.37    6.10
   3   2   4  332.47    6.50
   4   2   4   44.70    3.10
   4   2   4   46.80    3.40
   4   2   4   46.30    3.50
   5   2   4  218.48    6.70
   5   2   4  218.18    6.80
   6   2   4  566.34   12.20
   6   2   4  574.44   11.70
   7   2   4   28.40    4.40
   7   2   4   40.20    4.40
  -8   2   5  307.07   11.10
   8  -2  -5  306.17   10.40
  -7   2   5  151.58    7.80
   7  -2  -5  169.78    7.60
  -6   2   5   11.40    2.70
  -6   2   5   10.70    3.30
   6  -2  -5   12.20    2.90
  -5   2   5  574.94   12.00
  -5   2   5  580.04   10.30
   5  -2  -5  579.84   11.20
  -4   2   5    8.00    2.40
  -4   2   5    6.90    2.00
   4  -2  -5    7.10    2.00
  -3   2   5 1157.18   17.10
  -3   2   5 1163.38   15.20
   3  -2  -5 1163.18   15.50
  -2   2   5  616.14   10.90
  -2   2   5  632.74    9.50
   2  -2  -5  609.04    9.30
  -1   2   5   97.09    3.50
  -1   2   5  104.79    4.30
   1  -2  -5  101.49    3.20
   0   2   5   22.10    2.00
   0   2   5   23.50    2.70
   1   2   5   22.20    2.10
   1   2   5   25.00    2.60
   2   2   5  431.86    8.00
   2   2   5  436.66    9.30
   3   2   5  746.73   11.70
   3   2   5  754.02   13.10
   3   2   5  728.13   13.30
   4   2   5   34.60    3.80
   4   2   5   32.10    3.30
   4   2   5   34.50    3.30
   5   2   5  294.37   10.30
   5   2   5  318.97    8.30
   6   2   5   20.50    3.70
  -7   2   6    0.20    3.60
   7  -2  -6   -0.80    3.00
  -6   2   6  186.38    8.10
  -6   2   6  182.08    6.40
   6  -2  -6  171.08    7.10
  -5   2   6  301.47    7.50
  -5   2   6  294.27    9.20
   5  -2  -6  299.77    8.30
  -4   2   6  431.06   10.40
  -4   2   6  429.86    8.60
   4  -2  -6  439.16    9.20
  -3   2   6  135.89    5.90
  -3   2   6  144.69    4.60
   3  -2  -6  131.29    4.80
  -2   2   6   45.60    3.80
  -2   2   6   37.60    2.80
   2  -2  -6   38.70    2.90
  -1   2   6  373.26    8.70
  -1   2   6  370.66    7.10
   1  -2  -6  358.76    6.70
   0   2   6  488.75   10.20
   0   2   6  486.95    8.30
   1   2   6  191.38    5.10
   1   2   6  188.08    6.50
   2   2   6  561.64   11.60
   2   2   6  546.35    9.60
   3   2   6   97.49    4.70
   3   2   6  107.29    5.70
   4   2   6   50.59    4.10
   4   2   6   52.09    4.70
   5   2   6  211.98    8.60
   5   2   6  252.17    7.90
  -7   2   7  184.68    7.60
  -7   2   7  191.38    9.90
   7  -2  -7  198.28    8.80
  -6   2   7  117.29    7.60
  -6   2   7  115.79    5.80
   6  -2  -7  129.29    6.90
  -5   2   7   70.69    4.70
  -5   2   7   68.09    5.80
   5  -2  -7   68.79    5.20
  -4   2   7  118.69    5.10
  -4   2   7  119.09    6.50
  -4   2   7  126.59    5.30
   4  -2  -7  121.69    5.50
  -3   2   7  269.57    6.60
  -3   2   7  282.17    8.70
   3  -2  -7  269.17    7.00
  -2   2   7  528.95    9.40
  -2   2   7  523.45   11.50
  -1   2   7  130.19    4.70
  -1   2   7  141.69    6.10
   0   2   7  128.69    4.70
   0   2   7  125.29    6.00
   1   2   7  249.08    6.30
   1   2   7  257.97    8.30
   2   2   7  239.58    6.50
   2   2   7  233.98    8.20
   3   2   7   20.30    3.70
   3   2   7   28.90    3.20
   4   2   7   36.60    4.90
   4   2   7   40.10    4.00
  -6   2   8  155.18    9.20
   6  -2  -8  146.29    7.60
  -5   2   8  426.36   12.30
   5  -2  -8  419.06   15.80
  -4   2   8   -2.80    2.40
  -4   2   8   -3.50    3.00
  -4   2   8   -3.10    2.30
  -3   2   8    6.60    2.40
  -3   2   8    8.50    3.00
  -3   2   8   11.60    3.60
  -2   2   8   31.40    4.20
  -2   2   8   33.70    3.70
  -1   2   8   59.19    5.30
   0   2   8  299.27    9.40
   1   2   8   12.60    3.50
   2   2   8  451.55   12.00
   3   2   8   54.19    5.50
  -4   2   9    0.80    3.20
  -4   2   9   -5.20    3.10
  -3   2   9  651.53   13.70
  -3   2   9  640.34   15.20
  -2   2   9   36.60    4.90
  -2   2   9   38.40    4.60
  -1   2   9   34.50    4.50
  -1   2   9   35.70    4.70
   0   2   9    3.40    3.40
   1   2   9    2.20    3.40
   0  -3   9  296.87    9.80
  -1  -3   9    6.30    3.20
  -2  -3   9    7.10    3.50
  -3  -3   9   -4.60    3.00
   3  -3   8   78.19    6.10
   2  -3   8   21.80    3.60
   1  -3   8   17.60    3.50
   0  -3   8    3.50    2.70
  -1  -3   8  116.19    6.20
  -2  -3   8  152.78    6.90
   3   3  -8  370.16   10.20
  -3  -3   8  339.97    9.70
  -3  -3   8  342.47    9.50
   4   3  -8  190.08    8.00
  -4  -3   8  177.48    7.40
  -4  -3   8  180.58    7.60
   5   3  -8    7.60    3.50
  -5  -3   8    7.90    3.60
   4  -3   7   30.00    3.90
   3  -3   7    4.60    2.80
   2  -3   7  354.96    9.30
   1  -3   7  758.02   13.90
   0  -3   7  356.76    9.00
  -1  -3   7   97.59    5.20
  -1  -3   7  100.09    4.80
  -2  -3   7  152.08    6.10
  -2  -3   7  157.38    5.80
   3   3  -7   16.00    3.10
  -3  -3   7   18.70    3.00
  -3  -3   7   23.50    3.20
   4   3  -7  192.08    7.50
  -4  -3   7  200.68    7.30
  -4  -3   7  190.08    6.80
   5   3  -7    7.10    3.00
  -5  -3   7    6.80    2.90
  -5  -3   7   -3.40    2.50
   6   3  -7  211.48    8.70
  -6  -3   7  207.38    8.60
  -5   3  -6  172.28    7.40
   5  -3   6  190.38    7.90
  -4   3  -6  430.76   10.20
   4  -3   6  454.05   10.00
  -3   3  -6  467.15   10.10
   3  -3   6  484.55   10.20
   2  -3   6   55.69    4.20
   1  -3   6  116.39    5.10
   0  -3   6  121.89    5.00
   1   3  -6  207.18    5.70
  -1  -3   6  223.48    6.50
   2   3  -6   44.40    3.30
   2   3  -6   44.70    3.70
  -2  -3   6   49.90    3.80
  -2  -3   6   47.00    3.60
   3   3  -6  337.27    8.50
   3   3  -6  339.87    7.50
  -3  -3   6  328.27    7.80
  -3  -3   6  329.57    8.00
   4   3  -6  485.25    9.70
   4   3  -6  481.05   10.70
  -4  -3   6  471.75    9.60
  -4  -3   6  489.85   10.60
   5   3  -6  269.07    8.40
   5   3  -6  266.07    7.50
  -5  -3   6  265.87    8.30
  -5  -3   6  266.77    7.20
   6   3  -6   48.50    4.30
   6   3  -6   57.39    5.20
  -6  -3   6   50.79    5.00
   7   3  -6  170.68    8.00
   7   3  -6  175.58    8.20
  -7  -3   6  171.28    8.30
  -6   3  -5  370.36   10.70
   6  -3   5  356.56   10.50
  -5   3  -5   56.59    4.90
   5  -3   5   48.90    4.30
  -4   3  -5   -2.60    2.00
   4  -3   5    9.00    2.20
  -3   3  -5   98.39    4.50
   3  -3   5   97.19    4.50
  -2   3  -5   66.89    3.50
   2  -3   5   63.09    3.80
  -1   3  -5  443.26    7.80
   1  -3   5  449.26    8.70
   0   3  -5 1057.09   13.50
   0  -3   5 1068.39   15.10
   1   3  -5   46.40    3.00
  -1  -3   5   56.49    3.40
   2   3  -5   42.30    3.00
   2   3  -5   46.40    3.50
  -2  -3   5   45.80    3.10
  -2  -3   5   41.50    3.10
   3   3  -5  314.27    7.70
   3   3  -5  317.17    7.10
  -3  -3   5  313.77    7.10
  -3  -3   5  322.27    7.40
   4   3  -5  288.17    7.20
   4   3  -5  284.07    7.70
  -4  -3   5  290.77    6.80
  -4  -3   5  294.07    7.60
   5   3  -5   19.40    3.10
   5   3  -5   14.40    2.80
  -5  -3   5   12.40    2.20
  -5  -3   5   12.70    3.10
   6   3  -5  323.17    9.40
   6   3  -5  311.57    8.90
  -6  -3   5  325.97    9.60
   7   3  -5  335.97   10.30
   7   3  -5  328.67   10.00
  -7  -3   5  339.37   10.80
   8   3  -5  262.07   10.00
   8   3  -5  257.17    9.80
  -8  -3   5  258.57   10.40
  -7   3  -4   -0.30    3.70
   7  -3   4   -1.20    3.10
   7  -3   4    1.00    3.60
  -6   3  -4   18.70    3.90
   6  -3   4   12.50    3.40
  -5   3  -4   94.69    5.40
   5  -3   4   78.89    5.10
  -4   3  -4  516.25   10.40
   4  -3   4  508.85    9.10
  -3   3  -4 1479.25   19.40
   3  -3   4 1465.95   18.60
  -2   3  -4   31.40    2.60
   2  -3   4   34.20    2.60
  -1   3  -4   54.89    2.70
   1  -3   4   49.80    2.90
   0   3  -4   26.60    1.90
   0   3  -4   24.90    2.10
   0  -3   4   27.10    2.30
   1   3  -4   60.19    3.10
   1   3  -4   66.99    3.00
  -1  -3   4   61.99    3.00
   2   3  -4  498.95    9.00
   2   3  -4  500.25    8.50
  -2  -3   4  499.75    8.30
  -2  -3   4  496.25    8.50
   3   3  -4 1962.60   23.60
   3   3  -4 2021.20   24.40
  -3  -3   4 1981.60   23.80
  -3  -3   4 1971.90   23.10
   4   3  -4 1603.04   21.40
   4   3  -4 1651.13   21.00
  -4  -3   4 1653.73   21.50
  -4  -3   4 1618.74   19.80
   5   3  -4  128.89    5.40
   5   3  -4  132.89    5.40
  -5  -3   4  133.39    4.50
  -5  -3   4  135.99    5.90
   6   3  -4   10.20    2.90
   6   3  -4    9.00    2.80
  -6  -3   4    8.30    3.00
   7   3  -4   64.69    5.30
   7   3  -4   75.79    6.10
  -7  -3   4   81.09    6.10
   8   3  -4   24.20    4.20
   8   3  -4   19.00    4.30
  -7   3  -3  182.58    8.20
   7  -3   3  185.88    8.10
   7  -3   3  196.68    8.70
  -6   3  -3  495.35   11.60
   6  -3   3  469.05   11.30
  -5   3  -3   21.40    3.10
   5  -3   3   24.30    3.10
  -4   3  -3    3.30    1.80
   4  -3   3    0.40    1.30
  -3   3  -3   73.09    3.60
   3  -3   3   74.59    3.10
  -2   3  -3  205.38    5.00
   2  -3   3  205.88    4.80
  -1   3  -3 2609.54   28.40
   1  -3   3 2633.44   28.50
   0   3  -3 5253.17   51.99
   0   3  -3 5107.99   52.39
   0  -3   3 5139.19   52.39
   1   3  -3 1283.67   15.70
   1   3  -3 1270.67   15.80
  -1  -3   3 1269.07   15.60
   2   3  -3    3.90    1.30
   2   3  -3    4.70    1.40
  -2  -3   3    6.00    1.30
  -2  -3   3    6.00    1.40
   3   3  -3    9.30    1.70
   3   3  -3   10.50    1.80
  -3  -3   3    6.50    1.50
  -3  -3   3    8.50    1.70
   4   3  -3    3.60    1.60
   4   3  -3    2.30    1.70
  -4  -3   3    0.90    1.70
  -4  -3   3    2.10    1.40
   5   3  -3   58.99    3.90
   5   3  -3   55.39    4.10
  -5  -3   3   55.79    4.20
  -5  -3   3   55.69    3.20
   6   3  -3 1130.09   17.70
   6   3  -3 1137.29   17.70
  -6  -3   3 1124.49   18.10
   7   3  -3  219.58    8.30
   7   3  -3  235.28    8.20
   8   3  -3  119.99    7.50
   8   3  -3  103.59    6.90
  -8   3  -2  146.09    8.70
   8  -3   2  138.79    7.90
   8  -3   2  136.39    8.20
  -7   3  -2  149.69    7.30
   7  -3   2  142.09    7.50
   7  -3   2  145.69    7.20
  -6   3  -2   -0.10    2.50
   6  -3   2    3.50    2.40
  -5   3  -2  491.55   10.30
   5  -3   2  496.95   10.30
  -4   3  -2 1034.70   15.20
   4  -3   2 1036.20   15.20
   4  -3   2 1038.70   12.70
  -3   3  -2 1558.64   19.60
   3  -3   2 1574.54   17.80
  -2   3  -2    4.80    1.30
   2  -3   2    7.80    1.20
  -1   3  -2  194.88    4.30
   1  -3   2  193.28    4.10
   0   3  -2  367.56    6.20
   0  -3   2  366.96    6.00
   1   3  -2    5.70    1.20
   1   3  -2    6.20    1.20
  -1  -3   2    6.40    1.20
   2   3  -2   27.60    2.10
   2   3  -2   30.90    2.30
  -2  -3   2   24.00    1.90
  -2  -3   2   25.50    1.90
   3   3  -2 2574.64   28.80
   3   3  -2 2578.44   28.50
  -3  -3   2 2583.04   27.60
  -3  -3   2 2598.14   28.70
   4   3  -2  750.72   11.80
   4   3  -2  758.32   11.60
  -4  -3   2  756.22   10.30
  -4  -3   2  759.32   11.90
   5   3  -2   73.49    4.10
   5   3  -2   72.69    4.30
  -5  -3   2   70.59    3.10
   6   3  -2  148.09    6.20
   6   3  -2  159.58    6.20
   7   3  -2    2.90    3.00
   7   3  -2    4.40    2.90
   8   3  -2  157.68    8.30
   8   3  -2  154.88    7.60
  -8   3  -1  430.36   12.30
   8  -3   1  446.96   12.40
   8  -3   1  424.96   11.90
  -7   3  -1   69.29    5.50
   7  -3   1   64.59    5.20
   7  -3   1   69.39    5.60
  -6   3  -1  288.37    8.20
   6  -3   1  275.17    8.10
  -5   3  -1    8.60    2.10
   5  -3   1    6.60    2.00
  -4   3  -1  308.77    7.00
   4  -3   1  308.87    7.00
  -3   3  -1  137.59    4.20
   3  -3   1  134.09    3.00
  -2   3  -1 1093.39   13.80
   2  -3   1 1086.39   12.60
  -1   3  -1 2739.43   29.00
   1  -3   1 2744.63   28.30
   0   3  -1 2133.59   23.10
   0  -3   1 2177.88   22.90
   1   3  -1  866.41   10.60
   1   3  -1  879.61   11.20
  -1  -3   1  890.51   10.90
   2   3  -1 1086.89   13.00
   2   3  -1 1083.69   13.50
  -2  -3   1 1067.49   12.90
   3   3  -1 1024.60   13.60
   3   3  -1 1007.70   12.90
  -3  -3   1  996.90   12.40
   4   3  -1  186.18    5.30
   4   3  -1  182.08    4.90
  -4  -3   1  181.68    4.20
   5   3  -1  155.28    5.10
   5   3  -1  152.78    5.50
  -5  -3   1  148.99    4.00
   6   3  -1  962.30   16.00
   6   3  -1  997.60   15.40
   7   3  -1  529.85   11.50
   7   3  -1  534.15   12.30
   8   3  -1  210.48    9.10
   8   3  -1  202.68    8.20
  -8   3   0   24.80    4.20
   8  -3   0   21.30    4.00
   8  -3   0   21.50    4.10
  -7   3   0   93.39    5.70
   7  -3   0   92.29    6.20
   7  -3   0   92.79    5.80
  -6   3   0   60.19    4.30
   6  -3   0   60.19    4.40
  -5   3   0  617.84   11.20
   5  -3   0  614.34   11.20
  -4   3   0 2283.97   26.80
   4  -3   0 2300.87   26.90
  -3   3   0  904.51   12.40
  -3   3   0  884.41   11.40
   3  -3   0  899.31   12.30
  -2   3   0  124.89    3.40
  -2   3   0  118.49    3.00
   2  -3   0  127.29    2.80
  -1   3   0 2081.19   21.50
  -1   3   0 2085.89   22.50
   1  -3   0 2083.09   21.80
   0   3   0    0.40    0.70
   0   3   0    0.50    0.90
   0  -3   0    1.00    0.90
   1   3   0 2068.19   21.40
   1   3   0 2079.39   22.10
   1   3   0 2058.79   21.10
  -1  -3   0 2059.09   22.00
   2   3   0  123.89    3.50
   2   3   0  125.89    2.90
   2   3   0  126.39    3.10
  -2  -3   0  125.49    3.30
   3   3   0  899.11   12.30
   3   3   0  917.41   11.40
  -3  -3   0  882.41   11.30
   4   3   0 2354.56   26.20
   4   3   0 2377.06   27.50
  -4  -3   0 2326.27   25.30
   5   3   0  618.64   11.30
   5   3   0  636.64   10.50
   6   3   0   47.50    4.10
   6   3   0   58.99    4.20
   7   3   0   90.99    5.50
   7   3   0   94.39    6.40
   8   3   0   20.30    4.50
   8   3   0   15.30    3.70
  -8   3   1  189.88    8.20
   8  -3  -1  209.98    8.80
   8  -3  -1  185.78    8.30
  -7   3   1  523.95   11.60
   7  -3  -1  503.65   11.70
   7  -3  -1  512.45   11.80
  -6   3   1  972.90   14.90
  -6   3   1  952.10   15.40
   6  -3  -1  930.41   15.40
   6  -3  -1  945.81   15.60
  -5   3   1  150.48    5.00
  -5   3   1  152.68    5.20
   5  -3  -1  157.68    5.40
  -4   3   1  178.88    4.60
  -4   3   1  175.88    4.60
  -4   3   1  180.98    4.90
   4  -3  -1  173.48    5.00
  -3   3   1  989.00   12.60
  -3   3   1 1002.50   12.50
  -3   3   1 1002.50   13.10
   3  -3  -1 1007.20   13.20
  -2   3   1 1061.89   12.70
  -2   3   1 1080.99   13.00
   2  -3  -1 1074.59   12.80
   2  -3  -1 1054.39   12.00
  -1   3   1  863.61   10.30
  -1   3   1  859.31   10.20
   1  -3  -1  863.51   10.30
   1  -3  -1  848.02    9.80
   0   3   1 2155.58   22.50
   0   3   1 2109.59   22.20
   0   3   1 2105.39   22.00
   0  -3  -1 2144.89   22.60
   1   3   1 2697.43   28.10
   1   3   1 2715.33   28.10
  -1  -3  -1 2790.82   28.70
   2   3   1 1092.79   13.10
   2   3   1 1082.69   13.20
  -2  -3  -1 1071.09   13.10
   3   3   1  138.29    4.10
   3   3   1  134.89    3.20
  -3  -3  -1  136.19    3.70
   4   3   1  320.27    6.10
   4   3   1  325.17    7.10
   5   3   1    7.30    2.30
   5   3   1    7.10    1.90
   6   3   1  285.37    7.40
   6   3   1  294.77    8.50
   7   3   1   69.69    5.40
   7   3   1   67.79    5.10
   8   3   1  447.66   12.60
   8   3   1  444.86   15.10
  -8   3   2  149.59    7.30
   8  -3  -2  167.08    8.00
   8  -3  -2  172.68    8.10
  -7   3   2    3.50    2.50
  -7   3   2    5.60    3.20
   7  -3  -2    4.30    2.90
   7  -3  -2    4.20    2.80
  -6   3   2  127.29    5.40
  -6   3   2  147.89    5.80
   6  -3  -2  142.39    5.80
   6  -3  -2  134.39    5.90
  -5   3   2   71.79    3.70
  -5   3   2   71.79    3.70
  -5   3   2   72.79    4.10
   5  -3  -2   78.19    4.00
   5  -3  -2   74.59    4.10
  -4   3   2  750.32   11.10
  -4   3   2  757.62   11.20
  -4   3   2  747.33   11.40
   4  -3  -2  774.72   11.70
  -3   3   2 2593.04   28.20
  -3   3   2 2570.74   27.70
  -3   3   2 2524.05   27.70
   3  -3  -2 2536.65   27.90
  -2   3   2   29.10    2.10
  -2   3   2   24.30    1.70
  -2   3   2   24.80    1.80
   2  -3  -2   28.10    1.70
  -1   3   2    4.80    1.20
  -1   3   2    7.40    1.20
   1  -3  -2    9.20    0.90
   0   3   2  354.16    6.10
   0   3   2  361.66    5.70
   1   3   2  196.98    4.20
   1   3   2  193.58    3.70
   2   3   2    5.40    1.10
   2   3   2    6.70    1.30
   3   3   2 1606.14   19.00
   3   3   2 1554.94   17.40
   3   3   2 1593.74   18.90
   4   3   2 1076.49   15.10
   4   3   2 1056.29   13.50
   5   3   2  519.45   10.40
   5   3   2  507.95    9.00
   6   3   2    1.00    2.80
   6   3   2    2.80    2.00
   7   3   2  158.88    7.80
   8   3   2  161.68    8.70
  -8   3   3   93.29    6.20
  -8   3   3  103.49    7.10
   8  -3  -3  107.39    6.90
   8  -3  -3   98.09    6.80
  -7   3   3  216.18    7.90
  -7   3   3  223.08    7.50
   7  -3  -3  216.68    7.60
   7  -3  -3  204.48    7.80
  -6   3   3 1107.09   16.60
  -6   3   3 1136.29   17.50
  -6   3   3 1135.99   16.70
   6  -3  -3 1098.99   17.60
   6  -3  -3 1149.39   16.80
  -5   3   3   55.89    3.30
  -5   3   3   65.09    3.70
  -5   3   3   58.09    4.00
   5  -3  -3   57.89    3.60
   5  -3  -3   58.09    3.90
  -4   3   3    1.50    1.30
  -4   3   3    0.90    1.60
  -4   3   3    3.20    1.50
   4  -3  -3    0.30    1.20
   4  -3  -3   -1.10    1.20
  -3   3   3    6.90    1.50
  -3   3   3    8.70    1.30
  -3   3   3    8.10    1.80
   3  -3  -3    7.10    1.40
  -2   3   3    3.40    1.40
  -2   3   3    4.30    1.30
   2  -3  -3    6.00    1.10
  -1   3   3 1260.07   15.10
  -1   3   3 1273.57   16.00
   0   3   3 5178.88   53.29
   0   3   3 5186.48   52.09
   1   3   3 2669.43   28.50
   1   3   3 2633.04   29.80
   2   3   3  199.08    4.30
   2   3   3  203.88    4.90
   3   3   3   73.09    3.30
   3   3   3   82.99    3.50
   4   3   3    0.10    1.30
   4   3   3    1.30    1.70
   4   3   3    1.90    1.80
   5   3   3   21.30    2.90
   5   3   3   22.80    2.90
   6   3   3  487.65   10.60
   6   3   3  504.75   11.40
   7   3   3  195.78    8.40
   7   3   3  194.28    7.50
  -8   3   4   34.90    4.90
   8  -3  -4   29.20    4.50
   8  -3  -4   15.60    5.40
  -7   3   4   72.69    6.00
  -7   3   4   61.39    5.60
   7  -3  -4   64.89    5.10
   7  -3  -4   61.09    5.10
  -6   3   4    7.40    2.40
  -6   3   4    7.80    2.90
  -6   3   4   14.30    2.80
   6  -3  -4    9.20    2.30
   6  -3  -4    9.40    2.80
  -5   3   4  130.99    4.40
  -5   3   4  134.49    5.00
  -5   3   4  125.19    5.80
   5  -3  -4  134.69    4.60
   5  -3  -4  143.99    5.50
  -4   3   4 1586.74   19.90
  -4   3   4 1599.44   21.30
   4  -3  -4 1549.34   18.40
   4  -3  -4 1583.44   20.10
  -3   3   4 1959.50   24.30
  -3   3   4 1962.80   22.90
   3  -3  -4 1963.10   22.70
  -2   3   4  506.95    8.20
  -2   3   4  487.65    9.10
   2  -3  -4  496.55    7.50
  -1   3   4   67.19    3.40
  -1   3   4   64.39    2.90
   0   3   4   24.00    2.40
   0   3   4   26.00    2.00
   1   3   4   51.49    3.20
   1   3   4   51.99    2.80
   2   3   4   31.10    2.50
   2   3   4   31.60    3.00
   3   3   4 1466.65   18.00
   3   3   4 1481.75   19.00
   4   3   4  522.85    9.90
   4   3   4  527.55    9.70
   5   3   4   75.09    4.90
   5   3   4   93.09    5.10
   6   3   4   15.10    3.30
   6   3   4   13.70    3.30
   7   3   4   -6.30    2.90
   7   3   4   -1.40    3.50
  -8   3   5  263.07   10.50
   8  -3  -5  270.67   10.00
  -7   3   5  324.47    9.10
  -7   3   5  333.07   10.60
   7  -3  -5  331.77   10.00
  -6   3   5  312.47    8.20
  -6   3   5  308.77    9.50
   6  -3  -5  316.67    8.90
  -5   3   5   11.60    3.10
  -5   3   5   11.80    2.40
   5  -3  -5   15.20    2.70
  -4   3   5  288.67    8.10
  -4   3   5  295.27    6.90
   4  -3  -5  286.97    7.00
  -3   3   5  312.57    8.00
  -3   3   5  311.97    6.80
   3  -3  -5  311.97    6.60
  -2   3   5   47.40    3.70
  -2   3   5   44.50    3.00
   2  -3  -5   48.70    2.60
  -1   3   5   50.19    3.50
  -1   3   5   52.59    3.10
   0   3   5 1081.69   16.20
   0   3   5 1082.39   14.40
   1   3   5  433.86    7.90
   1   3   5  425.26    9.20
   2   3   5   60.59    4.20
   2   3   5   57.99    3.60
   3   3   5  100.19    4.50
   3   3   5   82.99    5.10
   4   3   5   -0.50    2.30
   4   3   5    1.60    2.40
   5   3   5   53.89    4.60
   6   3   5  368.26   10.10
  -7   3   6  174.58    8.80
  -7   3   6  164.68    7.30
   7  -3  -6  176.08    8.00
  -6   3   6   56.29    5.60
  -6   3   6   51.49    4.30
   6  -3  -6   53.29    4.70
  -5   3   6  263.77    7.50
  -5   3   6  290.87    9.20
   5  -3  -6  289.67    8.00
  -4   3   6  451.75    9.20
  -4   3   6  470.85   11.10
   4  -3  -6  480.35    9.60
  -3   3   6  325.57    7.30
  -3   3   6  343.67    9.10
   3  -3  -6  333.57    7.20
  -2   3   6   42.30    3.80
  -2   3   6   44.70    3.30
  -1   3   6  221.48    5.80
  -1   3   6  219.18    6.90
   0   3   6  125.29    5.50
   0   3   6  128.59    4.50
   1   3   6  125.59    4.70
   1   3   6  122.09    5.70
   2   3   6   52.09    3.90
   2   3   6   58.49    4.80
   3   3   6  486.85   11.60
   3   3   6  487.25   10.00
   4   3   6  455.25   10.10
   4   3   6  451.95   11.70
   5   3   6  187.88    7.40
   5   3   6  168.88    8.30
  -6   3   7  208.18    9.10
  -6   3   7  203.48    7.40
   6  -3  -7  196.38    7.90
  -5   3   7    4.50    2.60
  -5   3   7    0.10    3.40
   5  -3  -7    0.20    2.70
  -4   3   7  188.48    7.90
  -4   3   7  186.48    6.30
  -3   3   7   19.90    3.60
  -3   3   7   12.80    2.50
  -2   3   7  150.28    6.70
  -2   3   7  149.69    5.40
  -1   3   7  101.09    4.70
  -1   3   7  101.99    5.70
   0   3   7  353.76    9.60
   0   3   7  346.87    7.80
   1   3   7  774.12   12.70
   1   3   7  775.72   15.20
   2   3   7  354.66    8.40
   2   3   7  362.26   10.40
   3   3   7    8.00    3.30
   3   3   7    8.10    2.80
   4   3   7   30.60    4.00
   4   3   7   29.30    4.90
  -5   3   8   10.90    3.10
  -5   3   8   11.70    4.30
  -4   3   8  170.18    6.40
  -4   3   8  166.48    7.80
  -4   3   8  163.38    8.20
  -3   3   8  338.27   10.60
  -2   3   8  149.39    5.80
  -2   3   8  154.18    7.40
  -1   3   8  112.89    6.50
  -1   3   8  118.89    5.30
   0   3   8    1.30    2.30
   0   3   8    3.90    3.00
   1   3   8    8.30    3.40
   1   3   8    9.50    2.70
   2   3   8   25.90    3.40
   2   3   8   25.00    4.40
   3   3   8   94.29    6.40
   3   3   8   78.99    6.80
  -3   3   9   -1.80    3.10
  -3   3   9    2.00    3.40
  -2   3   9    0.80    3.60
  -1   3   9   -2.90    3.20
   0   3   9  311.07   10.60
  -1  -4   9   97.99    7.60
  -2  -4   9  342.07   11.00
   2  -4   8   23.40    4.20
   1  -4   8  378.66   10.60
   0  -4   8   17.00    3.60
  -1  -4   8  389.56   10.60
  -2  -4   8    5.10    2.90
  -3  -4   8   17.80    3.50
   4   4  -8   -5.10    2.60
  -4  -4   8   -3.20    2.70
  -4  -4   8   -0.50    2.80
   5   4  -8  145.09    8.30
  -5  -4   8  148.29    9.00
  -5  -4   8  142.39    7.40
   4  -4   7  238.38    8.30
   3  -4   7   22.40    3.90
   2  -4   7  267.27    8.60
   1  -4   7    0.70    2.70
   0  -4   7    7.60    2.70
  -1  -4   7    6.20    2.60
   2   4  -7  249.38    7.80
  -2  -4   7  240.28    7.70
   3   4  -7   87.29    5.60
   3   4  -7  101.09    7.10
  -3  -4   7   95.09    5.50
  -3  -4   7   88.49    5.10
   4   4  -7   72.69    5.70
  -4  -4   7   68.29    5.20
  -4  -4   7   75.19    5.20
   5   4  -7   -0.30    2.70
  -5  -4   7    1.90    3.00
  -5  -4   7   -0.10    2.70
   6   4  -7   -0.80    3.00
  -6  -4   7   10.90    3.60
  -5   4  -6   65.29    5.60
  -4   4  -6    7.20    2.90
   4  -4   6    6.40    2.70
  -3   4  -6  106.89    5.30
   3  -4   6  103.39    5.60
  -2   4  -6   63.59    4.00
   2  -4   6   67.19    4.60
   1  -4   6  419.36    9.40
   0  -4   6   58.89    4.20
   1   4  -6  376.96    8.30
  -1  -4   6  364.26    8.60
   2   4  -6   20.10    2.60
   2   4  -6   21.20    3.00
  -2  -4   6   23.70    2.90
  -2  -4   6   21.80    2.60
   3   4  -6   42.60    3.60
   3   4  -6   45.90    4.20
  -3  -4   6   43.00    3.70
  -3  -4   6   44.40    3.80
   4   4  -6    9.80    2.60
   4   4  -6   12.00    2.80
  -4  -4   6    5.80    2.50
  -4  -4   6    4.60    2.30
   5   4  -6  809.92   14.60
   5   4  -6  795.52   15.30
  -5  -4   6  818.32   13.70
  -5  -4   6  809.62   15.10
   6   4  -6  140.79    7.00
   6   4  -6  125.99    7.00
  -6  -4   6  126.89    7.00
   7   4  -6  414.96   11.90
   7   4  -6  409.46   11.90
  -7  -4   6  439.66   12.50
  -6   4  -5   88.89    6.80
   6  -4   5   85.89    6.60
  -5   4  -5  168.48    7.30
   5  -4   5  156.98    7.30
  -4   4  -5  702.83   13.40
   4  -4   5  714.43   12.30
  -3   4  -5   21.00    2.80
   3  -4   5   20.70    2.80
  -2   4  -5  760.02   12.40
   2  -4   5  784.42   12.90
  -1   4  -5   96.89    3.90
   1  -4   5   91.29    4.30
   0   4  -5   73.79    3.30
   0  -4   5   79.79    3.90
   1   4  -5   57.29    3.50
   1   4  -5   49.70    2.80
  -1  -4   5   49.80    3.40
   2   4  -5 1082.69   16.10
   2   4  -5 1078.09   15.30
  -2  -4   5 1071.99   14.70
  -2  -4   5 1058.99   15.50
   3   4  -5  161.58    5.80
   3   4  -5  156.18    5.50
  -3  -4   5  157.58    5.40
  -3  -4   5  159.98    5.30
   4   4  -5  885.61   14.50
   4   4  -5  896.11   15.10
  -4  -4   5  893.91   14.60
  -4  -4   5  906.31   13.90
   5   4  -5   12.00    2.90
   5   4  -5    6.00    2.60
  -5  -4   5   10.90    2.50
  -5  -4   5    9.60    2.80
   6   4  -5   88.79    6.00
   6   4  -5   88.79    6.20
  -6  -4   5   89.09    6.00
   7   4  -5   18.40    3.90
   7   4  -5   12.50    3.90
  -7  -4   5   20.10    4.00
  -6   4  -4   -3.10    2.90
   6  -4   4   -1.50    2.80
  -5   4  -4  471.75   11.20
   5  -4   4  468.45   11.20
  -4   4  -4  220.28    7.00
   4  -4   4  221.28    6.00
  -3   4  -4    4.00    1.90
   3  -4   4    7.50    1.90
  -2   4  -4  475.85    9.00
   2  -4   4  497.95    9.00
  -1   4  -4  680.23   10.60
   1  -4   4  665.43   10.80
   0   4  -4    5.30    1.40
   0   4  -4    4.20    1.50
   0  -4   4    2.40    1.30
   1   4  -4 1011.40   14.30
  -1  -4   4 1026.80   14.30
   2   4  -4  144.39    4.80
   2   4  -4  149.88    5.00
  -2  -4   4  142.19    4.60
  -2  -4   4  145.29    4.20
   3   4  -4   33.20    3.10
   3   4  -4   35.00    3.00
  -3  -4   4   38.60    3.10
  -3  -4   4   30.80    2.70
   4   4  -4   43.00    3.50
   4   4  -4   46.60    3.70
  -4  -4   4   44.60    3.50
  -4  -4   4   38.90    3.50
   5   4  -4  443.56    9.90
   5   4  -4  416.06    9.70
  -5  -4   4  418.66    9.80
  -5  -4   4  421.36    8.40
   6   4  -4    1.90    2.60
   6   4  -4    4.20    2.80
  -6  -4   4    6.40    2.90
   7   4  -4  266.17    9.00
   7   4  -4  270.87    9.40
   8   4  -4    6.70    3.70
   8   4  -4    1.70    3.80
  -7   4  -3   -0.40    3.30
   7  -4   3   -2.30    3.00
  -6   4  -3    3.30    2.80
   6  -4   3   -2.40    2.50
  -5   4  -3  142.39    6.20
   5  -4   3  126.29    5.90
  -4   4  -3  530.95   10.60
   4  -4   3  536.35    8.90
  -3   4  -3   40.10    3.20
   3  -4   3   39.20    2.70
  -2   4  -3  438.66    8.30
   2  -4   3  450.35    7.90
  -1   4  -3  306.77    6.30
   1  -4   3  316.97    6.30
   0   4  -3  117.39    4.00
   0  -4   3  117.99    3.80
   1   4  -3  484.95    8.40
  -1  -4   3  478.35    8.20
   2   4  -3 1645.74   20.20
   2   4  -3 1663.63   20.40
  -2  -4   3 1656.83   19.90
  -2  -4   3 1630.44   19.20
   3   4  -3   10.50    1.80
   3   4  -3   13.10    2.10
  -3  -4   3   12.80    1.90
  -3  -4   3   11.30    1.90
   4   4  -3  727.53   12.30
   4   4  -3  727.03   12.00
  -4  -4   3  727.73   11.10
  -4  -4   3  710.43   12.00
   5   4  -3  252.97    7.10
   5   4  -3  268.67    7.60
  -5  -4   3  258.97    6.30
   6   4  -3    1.50    2.60
   6   4  -3   -3.50    2.40
   7   4  -3   60.89    5.00
   7   4  -3   51.39    4.90
   8   4  -3  324.57   10.40
   8   4  -3  334.27   11.10
  -7   4  -2  411.46   11.60
   7  -4   2  423.16   11.50
  -6   4  -2   48.00    4.60
   6  -4   2   49.90    4.40
  -5   4  -2  191.68    6.60
   5  -4   2  184.38    6.50
  -4   4  -2   14.30    2.40
   4  -4   2   12.70    1.70
   4  -4   2   16.10    2.40
  -3   4  -2  268.37    6.50
   3  -4   2  261.77    5.30
  -2   4  -2  274.57    6.10
   2  -4   2  280.77    5.50
  -1   4  -2 2726.73   30.20
   1  -4   2 2789.02   29.70
   0   4  -2   12.70    1.60
   0  -4   2   10.00    1.50
   1   4  -2 2256.67   25.50
   1   4  -2 2263.97   25.10
  -1  -4   2 2274.87   25.20
   2   4  -2  331.87    6.30
   2   4  -2  338.07    6.70
  -2  -4   2  336.37    6.30
   3   4  -2   87.19    3.80
   3   4  -2   92.09    3.60
  -3  -4   2   95.69    3.50
   4   4  -2  184.98    5.70
   4   4  -2  191.08    5.40
  -4  -4   2  188.08    5.00
   5   4  -2  975.70   14.70
   5   4  -2  923.01   15.10
  -5  -4   2  946.71   13.00
   6   4  -2   15.10    3.20
   6   4  -2    9.40    2.50
   7   4  -2  758.82   15.30
   7   4  -2  766.02   14.50
   8   4  -2   94.29    6.60
   8   4  -2  105.99    7.70
  -8   4  -1  114.49    7.10
   8  -4   1  102.89    7.10
   8  -4   1  115.69    8.50
  -7   4  -1   54.79    5.10
   7  -4   1   80.99    6.00
  -6   4  -1  107.69    5.70
   6  -4   1  106.89    5.70
  -5   4  -1   32.90    3.30
   5  -4   1   25.40    2.90
  -4   4  -1 1733.23   22.30
   4  -4   1 1713.33   22.10
  -3   4  -1  188.18    4.30
  -3   4  -1  196.58    5.30
   3  -4   1  187.58    4.10
  -2   4  -1 3106.39   33.90
   2  -4   1 3146.19   32.50
  -1   4  -1   10.20    1.50
   1  -4   1   10.60    1.40
   0   4  -1  119.99    3.60
   0  -4   1  124.29    3.50
   1   4  -1    0.30    1.10
   1   4  -1    1.80    0.90
  -1  -4   1    0.70    1.10
   2   4  -1 1533.75   17.70
   2   4  -1 1524.05   16.90
   2   4  -1 1546.75   18.70
  -2  -4   1 1563.84   18.20
   3   4  -1   56.19    2.80
   3   4  -1   54.99    3.10
  -3  -4   1   56.99    2.80
   4   4  -1  780.52   11.60
   4   4  -1  764.72   12.40
  -4  -4   1  772.52   11.00
   5   4  -1  125.99    5.40
   5   4  -1  132.69    4.90
  -5  -4   1  130.59    4.30
   6   4  -1   62.69    4.90
   6   4  -1   59.09    4.40
   7   4  -1    5.10    2.90
   7   4  -1    7.00    3.30
   8   4  -1  135.59    7.30
   8   4  -1  139.99    8.00
  -8   4   0    3.80    3.30
   8  -4   0   -4.60    3.40
   8  -4   0    1.80    3.30
  -7   4   0  590.64   13.10
   7  -4   0  591.94   13.20
   7  -4   0  605.54   13.30
  -6   4   0   77.89    5.00
   6  -4   0   75.39    5.00
  -5   4   0 1002.10   15.60
   5  -4   0 1017.60   15.70
  -4   4   0    4.70    1.70
  -4   4   0    6.50    1.60
   4  -4   0    7.90    1.80
  -3   4   0    9.30    1.70
  -3   4   0   12.00    1.60
   3  -4   0   11.90    1.60
   3  -4   0   10.50    1.20
  -2   4   0   35.50    2.20
  -2   4   0   32.40    1.90
   2  -4   0   29.30    1.90
  -1   4   0  621.44    8.10
  -1   4   0  627.44    9.00
   1  -4   0  639.94    8.70
   0   4   0  601.14    7.70
   0   4   0  593.94    8.60
   0  -4   0  607.24    8.60
   1   4   0  631.24    8.30
   1   4   0  638.14    9.20
  -1  -4   0  631.74    9.00
   2   4   0   30.70    2.10
   2   4   0   33.50    2.50
   2   4   0   33.20    1.80
  -2  -4   0   32.40    2.20
   3   4   0   10.70    1.60
   3   4   0    9.50    1.40
   3   4   0    9.50    1.70
  -3  -4   0   12.10    1.70
   4   4   0    5.10    1.90
   4   4   0    4.90    1.50
  -4  -4   0    7.90    1.70
   5   4   0 1026.20   15.80
   5   4   0 1044.40   14.60
  -5  -4   0 1030.00   13.90
   6   4   0   81.99    4.70
   6   4   0   82.69    5.50
   7   4   0  636.44   12.50
   7   4   0  662.43   14.10
   8   4   0   -6.20    4.30
   8   4   0    3.40    3.80
  -8   4   1  124.39    6.90
   8  -4  -1  132.19    7.50
   8  -4  -1  141.89    7.90
  -7   4   1    3.70    2.90
   7  -4  -1    6.80    2.90
   7  -4  -1    4.80    3.00
  -6   4   1   62.29    4.50
  -6   4   1   65.69    4.50
   6  -4  -1   64.09    4.70
  -5   4   1  135.99    5.10
  -5   4   1  126.89    4.80
   5  -4  -1  137.09    5.30
  -4   4   1  750.32   11.80
  -4   4   1  748.73   11.20
   4  -4  -1  743.13   11.80
  -3   4   1   48.60    2.60
  -3   4   1   48.40    2.70
   3  -4  -1   49.50    2.00
   3  -4  -1   53.69    2.70
  -2   4   1 1523.95   17.80
  -2   4   1 1470.05   17.10
   2  -4  -1 1482.65   17.10
   2  -4  -1 1477.25   16.70
  -1   4   1    3.60    1.10
   1  -4  -1    2.30    1.00
   0   4   1  118.99    3.10
   0   4   1  122.79    3.20
   0   4   1  116.89    3.10
   0  -4  -1  124.79    3.40
   1   4   1    9.90    1.40
   1   4   1    7.20    1.30
  -1  -4  -1   12.30    1.60
   2   4   1 3194.48   33.90
   2   4   1 3223.58   33.60
  -2  -4  -1 3170.08   34.00
   3   4   1  183.08    4.70
   3   4   1  189.38    5.10
   3   4   1  187.28    3.90
  -3  -4  -1  192.48    4.80
   4   4   1 1751.42   21.30
   4   4   1 1734.73   20.10
   4   4   1 1746.63   21.90
  -4  -4  -1 1766.32   20.90
   5   4   1   29.50    3.20
   5   4   1   30.40    2.50
   6   4   1  106.49    4.90
   6   4   1  111.49    6.00
   7   4   1   67.99    5.50
   8   4   1  109.99    8.00
  -8   4   2   78.99    6.20
   8  -4  -2   94.59    7.10
   8  -4  -2   74.99    5.90
  -7   4   2  726.33   14.10
  -7   4   2  707.43   13.60
   7  -4  -2  738.33   14.20
   7  -4  -2  732.73   14.60
  -6   4   2    8.90    2.50
  -6   4   2    2.20    2.30
  -6   4   2    8.20    2.60
   6  -4  -2    6.70    2.60
   6  -4  -2    5.80    2.50
  -5   4   2  936.01   14.30
  -5   4   2  910.31   13.80
  -5   4   2  940.41   14.10
   5  -4  -2  929.11   14.60
  -4   4   2  181.28    5.20
  -4   4   2  180.48    5.10
  -4   4   2  189.68    5.10
   4  -4  -2  177.78    5.20
  -3   4   2   85.19    3.30
  -3   4   2   85.29    3.40
  -3   4   2   87.99    3.40
   3  -4  -2   86.19    3.20
  -2   4   2  328.87    6.10
  -2   4   2  332.37    6.10
  -2   4   2  327.87    5.90
   2  -4  -2  334.47    5.70
   2  -4  -2  331.27    5.80
  -1   4   2 2231.68   25.00
  -1   4   2 2250.17   24.80
   1  -4  -2 2339.67   25.00
   0   4   2   11.80    1.60
   0   4   2   14.50    1.30
   0   4   2   11.30    1.50
   0  -4  -2   13.60    1.60
   1   4   2 2764.52   29.60
   1   4   2 2783.52   29.00
  -1  -4  -2 2771.92   30.20
   2   4   2  289.27    5.60
   2   4   2  290.67    5.90
   3   4   2  267.17    6.00
   3   4   2  267.57    6.00
   4   4   2   14.00    2.30
   4   4   2    9.30    2.20
   4   4   2   15.00    1.70
   5   4   2  191.78    6.10
   5   4   2  194.28    6.70
   6   4   2   54.19    4.20
   6   4   2   59.59    4.80
   7   4   2  449.76   11.90
  -8   4   3  298.67    9.70
  -8   4   3  336.17   11.70
   8  -4  -3  348.27   10.60
   8  -4  -3  339.47   10.70
  -7   4   3   52.49    4.70
  -7   4   3   47.30    4.40
   7  -4  -3   54.99    4.90
   7  -4  -3   67.69    5.40
  -6   4   3    0.40    2.10
  -6   4   3    1.80    2.60
  -6   4   3   -0.70    2.10
   6  -4  -3   -0.30    2.20
   6  -4  -3    1.00    2.30
  -5   4   3  265.67    7.20
  -5   4   3  260.97    6.80
  -5   4   3  265.97    6.70
   5  -4  -3  273.57    7.20
   5  -4  -3  259.67    6.60
  -4   4   3  725.43   11.20
  -4   4   3  728.53   11.50
  -4   4   3  724.63   12.00
   4  -4  -3  736.63   11.60
  -3   4   3   12.50    1.60
  -3   4   3   13.70    2.10
  -3   4   3   13.70    1.80
   3  -4  -3   10.90    1.60
  -2   4   3 1612.04   18.30
  -2   4   3 1594.74   19.10
  -2   4   3 1607.24   19.70
   2  -4  -3 1601.54   18.00
  -1   4   3  486.85    7.90
  -1   4   3  478.15    8.40
   0   4   3  112.59    4.00
   0   4   3  117.19    3.60
   1   4   3  312.77    6.20
   1   4   3  320.67    7.00
   2   4   3  435.46    7.10
   2   4   3  439.36    7.90
   3   4   3   36.40    2.90
   3   4   3   39.40    2.90
   4   4   3  574.04   10.30
   4   4   3  570.44   10.40
   5   4   3  136.39    5.70
   5   4   3  132.79    5.80
   6   4   3    4.00    3.00
   6   4   3    1.70    2.70
   7   4   3    0.90    3.50
   7   4   3    2.10    3.20
  -8   4   4    5.10    4.00
   8  -4  -4    0.00    3.30
  -7   4   4  253.17    8.40
  -7   4   4  262.87    9.00
   7  -4  -4  252.97    8.80
  -6   4   4   -0.50    2.00
  -6   4   4    3.70    2.40
  -6   4   4    5.50    2.90
   6  -4  -4    3.20    2.70
  -5   4   4  407.26    8.10
  -5   4   4  409.76    8.90
  -5   4   4  418.76    9.70
   5  -4  -4  401.06    9.00
  -4   4   4   38.20    3.10
  -4   4   4   34.50    3.40
  -4   4   4   40.10    2.70
   4  -4  -4   38.80    3.00
  -3   4   4   40.40    3.00
  -3   4   4   30.60    3.10
   3  -4  -4   33.30    2.50
  -2   4   4  148.49    5.00
  -2   4   4  150.88    4.50
   2  -4  -4  137.69    3.60
  -1   4   4 1039.30   13.90
  -1   4   4  999.90   14.80
   0   4   4    3.20    1.40
   0   4   4    3.60    1.70
   1   4   4  664.93   11.60
   1   4   4  667.23   10.40
   2   4   4  466.85    9.70
   2   4   4  473.45    8.80
   3   4   4    1.60    2.00
   3   4   4    3.80    1.60
   4   4   4  236.48    6.50
   4   4   4  235.58    7.00
   5   4   4  483.25   10.40
   5   4   4  486.65   10.60
   6   4   4    2.90    3.10
   6   4   4    3.80    3.00
  -7   4   5   16.40    4.20
  -7   4   5   14.40    3.60
   7  -4  -5   19.70    3.80
  -6   4   5   91.09    6.40
  -6   4   5   88.19    5.40
   6  -4  -5   94.69    5.80
  -5   4   5    7.80    2.40
  -5   4   5    3.50    2.90
   5  -4  -5    4.20    2.30
  -4   4   5  854.51   15.00
  -4   4   5  873.31   13.70
   4  -4  -5  871.21   13.30
  -3   4   5  161.48    6.10
  -3   4   5  164.98    5.30
   3  -4  -5  154.78    4.60
  -2   4   5 1051.89   16.20
  -2   4   5 1071.49   14.90
  -1   4   5   55.29    3.30
  -1   4   5   55.39    3.90
   0   4   5   77.99    3.70
   0   4   5   68.99    4.30
   1   4   5   84.99    4.70
   1   4   5   83.79    4.00
   2   4   5  778.02   12.50
   2   4   5  787.52   14.10
   3   4   5   20.50    3.00
   3   4   5   15.40    3.20
   4   4   5  725.63   14.90
   4   4   5  745.83   13.20
   5   4   5  161.28    7.80
   5   4   5  145.09    6.80
   6   4   5   93.49    6.60
  -7   4   6  423.46   10.90
  -7   4   6  427.36   12.60
   7  -4  -6  446.16   11.90
  -6   4   6  136.09    6.50
  -6   4   6  137.69    7.60
   6  -4  -6  125.39    6.70
  -5   4   6  820.02   14.20
  -5   4   6  824.32   16.00
   5  -4  -6  814.42   14.40
  -4   4   6   11.30    3.20
  -4   4   6    8.70    2.50
  -3   4   6   40.30    3.50
  -3   4   6   49.70    4.40
  -2   4   6   20.30    2.70
  -2   4   6   25.50    3.40
  -1   4   6  374.46    8.10
  -1   4   6  364.76    9.30
   0   4   6   71.59    4.10
   0   4   6   66.79    4.80
   1   4   6  431.66   10.60
   1   4   6  442.46    9.10
   2   4   6   61.19    5.10
   2   4   6   59.29    4.40
   3   4   6  118.39    5.70
   3   4   6  123.29    6.80
   4   4   6    8.90    3.50
   4   4   6    3.10    3.00
   5   4   6   60.79    5.10
   5   4   6   65.79    6.20
  -6   4   7    8.30    3.00
  -6   4   7   10.90    4.00
  -5   4   7   -0.60    2.70
  -5   4   7   -3.70    3.30
  -4   4   7   68.19    4.80
  -4   4   7   76.19    6.20
  -3   4   7   89.99    6.30
  -3   4   7   96.89    5.00
  -2   4   7  253.57    8.60
  -2   4   7  258.57    7.20
  -1   4   7    1.20    2.20
  -1   4   7    4.50    2.70
   0   4   7    8.30    3.10
   0   4   7    9.60    2.50
   1   4   7    2.30    2.20
   1   4   7   -0.70    2.80
   2   4   7  297.57    9.80
   2   4   7  287.57    8.10
   3   4   7   23.00    3.80
   3   4   7   24.70    4.50
   4   4   7  218.38    9.60
   4   4   7  233.78    8.30
  -5   4   8  142.39    8.90
  -5   4   8  127.49    6.70
  -4   4   8    0.90    3.60
  -4   4   8    5.20    2.80
  -3   4   8   21.10    4.40
  -3   4   8   17.20    3.10
  -2   4   8    6.60    3.40
  -2   4   8    5.50    2.80
  -1   4   8  388.66    9.30
  -1   4   8  387.56   11.20
   0   4   8   13.60    3.20
   0   4   8   15.60    3.80
   1   4   8  398.86   11.60
   1   4   8  371.16    9.30
   2   4   8   20.60    4.60
   2   4   8   28.00    3.80
  -2   4   9  341.27   11.70
  -1   4   9   94.89    7.40
  -1   4   9   85.89    6.80
   1  -5   8    0.60    3.10
   0  -5   8   40.30    4.80
  -1  -5   8  260.87    9.00
  -2  -5   8    8.80    3.30
  -3  -5   8  109.69    6.70
   4   5  -8   49.99    5.20
  -4  -5   8   50.29    4.90
   3  -5   7   81.89    6.10
   2  -5   7  132.59    6.80
   1  -5   7    5.30    2.80
   0  -5   7  597.34   12.70
  -1  -5   7   54.59    4.50
   2   5  -7  135.29    6.00
  -2  -5   7  128.79    6.20
   3   5  -7   34.70    3.70
   3   5  -7   31.40    4.00
  -3  -5   7   29.20    3.90
   4   5  -7  105.59    6.40
   4   5  -7  106.29    6.10
  -4  -5   7  104.89    6.20
   5   5  -7  122.59    7.10
   5   5  -7  138.99    7.00
  -5  -5   7  135.89    7.00
  -5  -5   7  127.89    6.90
  -4   5  -6    4.00    2.90
   4  -5   6   -0.10    2.60
  -3   5  -6  717.13   13.50
   3  -5   6  733.13   13.70
  -2   5  -6  261.17    7.50
   2  -5   6  264.97    8.00
  -1   5  -6  114.89    4.80
   1  -5   6  118.39    5.70
   0  -5   6    9.00    2.60
   1   5  -6  227.18    7.00
  -1  -5   6  234.28    7.20
   2   5  -6    3.00    2.00
  -2  -5   6   -0.40    1.90
   3   5  -6  543.15   11.70
   3   5  -6  531.95   11.00
  -3  -5   6  512.95   10.20
  -3  -5   6  532.95   11.10
   4   5  -6   94.79    5.80
   4   5  -6   84.69    5.50
  -4  -5   6   92.29    5.40
  -4  -5   6   89.79    5.10
   5   5  -6   20.20    3.60
   5   5  -6   18.70    3.50
  -5  -5   6   21.20    3.40
  -5  -5   6   22.80    3.50
   6   5  -6   43.30    4.80
   6   5  -6   50.39    5.10
  -6  -5   6   34.20    4.60
  -5   5  -5   43.00    4.80
  -4   5  -5   60.19    5.00
   4  -5   5   66.39    4.70
  -3   5  -5   16.90    3.00
   3  -5   5   14.10    2.70
  -2   5  -5  449.66    9.60
   2  -5   5  458.85    9.70
  -1   5  -5  281.37    7.00
   1  -5   5  286.17    7.40
   0   5  -5  287.17    6.70
   0  -5   5  282.17    7.30
   1   5  -5   -0.30    1.60
   1   5  -5   -1.10    1.30
  -1  -5   5   -2.40    1.50
   2   5  -5  258.47    7.10
   2   5  -5  248.08    7.20
  -2  -5   5  242.68    6.90
   3   5  -5   -1.60    1.90
   3   5  -5    4.10    2.20
  -3  -5   5    1.80    2.00
  -3  -5   5    3.40    1.90
   4   5  -5  235.38    7.60
   4   5  -5  224.68    7.40
  -4  -5   5  240.98    7.10
  -4  -5   5  228.48    7.00
   5   5  -5  224.98    7.90
   5   5  -5  223.88    7.80
  -5  -5   5  206.98    7.50
  -5  -5   5  203.08    6.90
   6   5  -5  987.40   17.60
   6   5  -5  972.50   17.60
  -6  -5   5  948.31   17.40
   7   5  -5   12.90    3.90
   7   5  -5    6.50    3.70
  -6   5  -4    4.70    3.40
   6  -5   4    2.70    3.10
  -5   5  -4  341.07   10.00
   5  -5   4  346.67   10.00
  -4   5  -4   40.50    4.00
   4  -5   4   37.30    3.20
  -3   5  -4  339.77    8.50
   3  -5   4  350.46    7.80
  -2   5  -4  108.19    4.60
   2  -5   4  104.29    4.50
  -1   5  -4  527.35    9.70
   1  -5   4  531.45    9.70
   0   5  -4  285.27    6.60
   0   5  -4  296.27    7.20
   0  -5   4  293.17    6.90
   1   5  -4 1687.23   21.70
  -1  -5   4 1662.53   21.30
   2   5  -4  231.18    6.50
   2   5  -4  230.78    6.40
  -2  -5   4  233.38    6.30
   3   5  -4  697.53   12.40
   3   5  -4  719.23   12.40
  -3  -5   4  706.23   11.50
  -3  -5   4  729.53   12.00
   4   5  -4   15.00    2.60
   4   5  -4   15.90    2.80
  -4  -5   4   17.10    2.60
  -4  -5   4   11.50    2.40
   5   5  -4  425.86   10.10
   5   5  -4  421.76   10.40
  -5  -5   4  409.76    8.90
   6   5  -4   57.99    5.00
   6   5  -4   64.89    5.10
   7   5  -4    2.30    3.00
   7   5  -4    3.90    3.50
  -7   5  -3   26.90    5.20
   7  -5   3   20.20    4.20
  -6   5  -3  636.64   14.20
   6  -5   3  641.34   14.10
  -5   5  -3   44.80    4.20
   5  -5   3   45.20    4.10
  -4   5  -3   70.29    4.60
   4  -5   3   72.89    3.80
  -3   5  -3  102.79    4.80
   3  -5   3  110.09    4.20
  -2   5  -3 1268.07   17.60
   2  -5   3 1280.57   16.80
  -1   5  -3    9.00    1.80
   1  -5   3    8.20    1.70
   0   5  -3  481.05    9.00
   0  -5   3  477.95    8.60
   1   5  -3   86.09    3.90
  -1  -5   3   84.89    3.70
   2   5  -3 2129.39   25.70
   2   5  -3 2111.49   25.20
  -2  -5   3 2116.99   25.10
   3   5  -3  320.97    7.30
   3   5  -3  324.47    7.80
  -3  -5   3  320.57    7.10
   4   5  -3  382.76    9.10
   4   5  -3  390.66    8.60
  -4  -5   3  392.26    8.10
   5   5  -3   63.09    5.00
   5   5  -3   60.49    4.50
  -5  -5   3   59.79    4.10
   6   5  -3  442.56   11.10
   6   5  -3  459.65   10.70
   7   5  -3   19.80    4.10
   7   5  -3   14.60    3.50
   8   5  -3   86.59    7.10
   8   5  -3   95.19    6.80
  -7   5  -2   18.70    3.90
   7  -5   2   10.50    3.50
  -6   5  -2    3.30    2.90
   6  -5   2    5.10    2.80
  -5   5  -2   95.19    5.20
   5  -5   2  101.89    5.40
  -4   5  -2   45.40    3.70
   4  -5   2   43.80    2.90
  -3   5  -2 1227.58   17.40
   3  -5   2 1209.88   15.50
  -2   5  -2  276.77    6.60
   2  -5   2  273.37    5.90
  -1   5  -2  999.40   14.20
   1  -5   2  995.70   13.50
   0   5  -2    8.90    1.70
   0  -5   2   11.60    1.80
   1   5  -2 1427.36   18.30
  -1  -5   2 1420.96   17.90
   2   5  -2   57.59    3.10
   2   5  -2   55.69    3.30
  -2  -5   2   60.79    3.20
   3   5  -2  288.57    6.50
   3   5  -2  285.27    7.00
  -3  -5   2  290.67    6.60
   4   5  -2  262.37    6.60
   4   5  -2  263.97    7.30
  -4  -5   2  265.57    6.40
   5   5  -2  318.17    8.60
   5   5  -2  323.97    8.00
  -5  -5   2  318.37    7.30
   6   5  -2    1.70    2.30
   6   5  -2   -3.80    2.50
   7   5  -2  105.69    6.90
   7   5  -2   85.59    5.90
   8   5  -2   15.80    3.80
   8   5  -2   18.40    4.80
  -7   5  -1   10.80    3.40
   7  -5   1    6.10    3.10
  -6   5  -1 1191.88   19.70
   6  -5   1 1216.28   19.70
  -5   5  -1   38.00    3.70
   5  -5   1   40.00    3.70
  -4   5  -1    6.50    1.90
   4  -5   1    7.70    1.50
   4  -5   1    9.60    2.10
  -3   5  -1  186.68    4.50
  -3   5  -1  194.38    5.70
   3  -5   1  181.68    4.50
  -2   5  -1  689.53   11.10
   2  -5   1  699.23   10.10
  -1   5  -1   91.09    3.60
  -1   5  -1   84.09    3.50
   1  -5   1   96.19    3.40
   0   5  -1 1207.88   15.70
   0  -5   1 1197.78   15.20
   1   5  -1   99.49    3.80
  -1  -5   1   97.79    3.60
   2   5  -1  661.63   10.60
   2   5  -1  669.03    9.60
  -2  -5   1  653.63   10.20
   3   5  -1   52.69    2.90
   3   5  -1   54.39    2.80
   3   5  -1   52.49    3.50
  -3  -5   1   63.09    3.30
   4   5  -1  365.76    7.10
   4   5  -1  368.16    7.50
   4   5  -1  356.36    8.30
  -4  -5   1  376.76    7.60
   5   5  -1  376.86    9.20
   5   5  -1  377.46    8.20
  -5  -5   1  385.46    7.80
   6   5  -1 1344.87   19.30
   6   5  -1 1378.16   21.10
   7   5  -1    5.00    3.50
   7   5  -1    4.70    2.90
   8   5  -1  196.68    9.30
  -8   5   0   -2.60    3.20
   8  -5   0    4.00    4.20
   8  -5   0    2.30    4.20
  -7   5   0   45.70    4.70
   7  -5   0   57.29    5.20
  -6   5   0   72.49    5.10
   6  -5   0   82.99    5.40
  -5   5   0  248.78    6.50
  -5   5   0  240.48    7.20
   5  -5   0  233.68    7.20
  -4   5   0   23.10    2.30
  -4   5   0   18.00    2.40
   4  -5   0   26.00    2.80
  -3   5   0 2479.15   28.80
  -3   5   0 2448.06   27.00
   3  -5   0 2414.86   28.00
   3  -5   0 2457.05   26.50
  -2   5   0  532.35    8.00
  -2   5   0  528.75    9.10
   2  -5   0  540.65    8.30
  -1   5   0  693.33   10.30
  -1   5   0  689.33    9.20
   1  -5   0  698.23   10.00
   0   5   0    0.40    1.00
   0   5   0   -0.10    0.90
   0  -5   0    1.60    1.10
   1   5   0  694.03    9.30
   1   5   0  700.53   10.40
  -1  -5   0  697.13   10.40
   2   5   0  547.35    9.20
   2   5   0  536.95    8.10
   2   5   0  538.45    7.70
  -2  -5   0  533.45    8.90
   3   5   0 2538.85   29.20
   3   5   0 2513.25   27.80
   3   5   0 2494.45   27.10
  -3  -5   0 2514.55   28.50
   4   5   0   18.60    2.60
   4   5   0   25.90    2.20
   4   5   0   25.30    2.50
  -4  -5   0   23.50    2.50
   5   5   0  260.27    6.70
   5   5   0  242.78    7.50
   5   5   0  245.98    6.30
  -5  -5   0  245.98    6.30
   6   5   0   82.89    4.80
   6   5   0   85.39    5.90
   7   5   0   60.39    5.60
   8   5   0    1.70    4.00
  -8   5   1  196.98    8.60
   8  -5  -1  221.58    9.40
   8  -5  -1  218.08    9.30
  -7   5   1    7.50    3.10
   7  -5  -1    7.30    3.40
   7  -5  -1    7.90    3.00
  -6   5   1 1359.26   20.50
   6  -5  -1 1306.37   20.30
  -5   5   1  379.96    8.90
  -5   5   1  371.46    8.10
   5  -5  -1  358.96    8.70
  -4   5   1  358.26    7.90
  -4   5   1  349.17    7.30
   4  -5  -1  351.36    7.70
  -3   5   1   60.79    3.10
  -3   5   1   54.09    3.10
   3  -5  -1   57.79    3.00
   3  -5  -1   53.89    2.50
  -2   5   1  636.14   10.00
  -2   5   1  632.54    9.30
   2  -5  -1  621.74    9.20
   2  -5  -1  631.04    9.20
  -1   5   1  100.29    3.30
   1  -5  -1  105.59    3.40
   0   5   1 1199.38   14.60
   0   5   1 1219.78   14.90
   0  -5  -1 1202.78   15.20
   1   5   1   88.19    3.40
   1   5   1   89.29    3.20
  -1  -5  -1   99.49    3.60
   2   5   1  707.63   10.20
   2   5   1  718.63   10.80
  -2  -5  -1  702.33   10.90
   3   5   1  188.18    5.20
   3   5   1  188.98    5.50
  -3  -5  -1  186.48    5.30
   4   5   1   10.60    2.30
   4   5   1   10.60    2.30
   4   5   1    7.30    1.60
  -4  -5  -1    9.50    2.10
   5   5   1   36.90    3.60
   5   5   1   39.60    3.60
   6   5   1 1284.37   20.10
   6   5   1 1254.67   18.80
   7   5   1   11.60    3.50
   7   5   1    2.90    3.70
  -8   5   2   16.20    4.00
   8  -5  -2   17.10    4.20
   8  -5  -2   20.90    4.30
  -7   5   2   88.39    5.70
   7  -5  -2   80.49    6.10
   7  -5  -2   90.29    6.20
  -6   5   2    1.30    2.20
  -6   5   2    0.40    2.20
   6  -5  -2   -3.00    2.00
  -5   5   2  322.77    7.90
  -5   5   2  314.77    7.60
  -5   5   2  300.27    7.30
   5  -5  -2  322.97    8.00
  -4   5   2  250.27    6.40
  -4   5   2  241.48    6.30
  -4   5   2  251.07    6.10
   4  -5  -2  247.28    6.30
  -3   5   2  283.77    6.30
  -3   5   2  289.47    6.40
   3  -5  -2  292.97    5.70
   3  -5  -2  289.67    6.10
  -2   5   2   57.89    3.10
  -2   5   2   59.39    2.90
  -2   5   2   56.89    2.90
   2  -5  -2   57.79    2.80
   2  -5  -2   56.99    2.50
  -1   5   2 1435.86   17.30
  -1   5   2 1432.26   17.50
   1  -5  -2 1419.26   17.50
   0   5   2   10.30    1.70
   0   5   2    8.10    1.40
   0   5   2   12.10    1.60
   0  -5  -2   12.40    1.80
   1   5   2  980.70   13.20
   1   5   2  996.70   14.00
   1   5   2 1006.50   12.80
  -1  -5  -2  996.40   13.90
   2   5   2  273.37    6.20
   2   5   2  285.27    6.00
  -2  -5  -2  270.87    6.40
   3   5   2 1240.08   16.70
   3   5   2 1267.57   16.80
   4   5   2   53.39    4.00
   4   5   2   46.60    3.50
   5   5   2  105.09    5.60
   5   5   2  110.69    5.40
   6   5   2    5.30    2.90
   6   5   2    9.50    3.20
   7   5   2   12.50    3.80
   7   5   2   17.10    3.80
  -8   5   3   83.39    6.10
   8  -5  -3   92.79    7.40
   8  -5  -3   94.89    7.20
  -7   5   3   12.30    3.30
  -7   5   3   14.00    3.30
   7  -5  -3   15.20    3.50
   7  -5  -3    9.90    3.40
  -6   5   3  441.46   10.00
  -6   5   3  429.86    9.80
  -6   5   3  425.46   10.00
   6  -5  -3  453.35    9.90
   6  -5  -3  427.36   10.30
  -5   5   3   56.59    4.40
  -5   5   3   56.99    4.00
  -5   5   3   58.29    3.80
   5  -5  -3   55.89    4.20
  -4   5   3  381.36    8.10
  -4   5   3  390.26    7.90
  -4   5   3  389.76    8.40
   4  -5  -3  387.76    8.00
  -3   5   3  309.17    6.50
  -3   5   3  312.47    6.90
  -3   5   3  311.87    7.10
   3  -5  -3  317.57    6.40
  -2   5   3 2112.99   23.70
  -2   5   3 2110.09   24.30
  -2   5   3 2056.19   24.50
   2  -5  -3 2048.00   22.60
  -1   5   3   76.49    3.40
  -1   5   3   84.19    3.80
   0   5   3  481.75    8.90
   0   5   3  475.25    8.30
   1   5   3    6.20    1.70
   1   5   3    7.50    1.90
   1   5   3    7.60    1.40
   2   5   3 1287.37   17.10
   2   5   3 1300.47   16.10
   3   5   3  115.19    4.80
   3   5   3  119.69    4.50
   4   5   3   71.99    4.50
   4   5   3   77.29    4.50
   5   5   3   45.40    4.00
   5   5   3   48.90    4.20
   6   5   3  664.33   13.50
   6   5   3  674.43   13.50
   7   5   3   33.30    4.60
   7   5   3   20.20    4.50
  -7   5   4    1.40    2.90
  -7   5   4    1.50    3.40
   7  -5  -4   -2.80    2.90
  -6   5   4   61.69    4.60
  -6   5   4   63.89    5.40
   6  -5  -4   52.29    4.40
  -5   5   4  408.36    9.20
  -5   5   4  403.06    8.50
  -5   5   4  393.26    9.70
   5  -5  -4  418.16    9.30
  -4   5   4    7.30    2.50
  -4   5   4    9.80    2.20
  -4   5   4    8.80    1.90
   4  -5  -4    9.70    2.10
  -3   5   4  691.63   10.30
  -3   5   4  678.63   12.00
  -3   5   4  684.43   11.30
   3  -5  -4  680.53   10.20
  -2   5   4  225.08    5.00
  -2   5   4  225.48    5.90
  -2   5   4  222.48    6.30
  -1   5   4 1652.23   21.70
  -1   5   4 1701.83   20.90
   0   5   4  279.17    6.50
   0   5   4  296.87    7.40
   1   5   4  531.15    9.50
   1   5   4  535.15   10.60
   2   5   4  104.29    5.30
   2   5   4   95.79    4.50
   3   5   4  349.07    9.30
   3   5   4  360.86    8.40
   4   5   4   39.10    3.80
   5   5   4  350.16    9.50
   6   5   4    1.40    3.30
  -7   5   5   12.60    3.30
  -7   5   5    9.40    4.10
   7  -5  -5   12.50    3.70
  -6   5   5  984.10   16.50
  -6   5   5  944.31   17.40
   6  -5  -5  965.10   16.60
  -5   5   5  208.18    7.20
  -5   5   5  211.58    7.90
   5  -5  -5  210.38    6.90
  -4   5   5  222.38    6.70
  -4   5   5  223.38    7.60
  -3   5   5   -0.70    1.90
  -3   5   5    0.60    2.30
  -2   5   5  248.08    7.40
  -2   5   5  246.68    6.60
  -1   5   5    2.40    1.90
  -1   5   5   -0.40    2.00
   0   5   5  276.07    8.00
   0   5   5  294.67    7.00
   1   5   5  281.57    8.20
   1   5   5  291.27    7.20
   2   5   5  451.45    9.50
   2   5   5  442.86   10.70
   3   5   5   14.20    3.20
   3   5   5   15.00    3.00
   4   5   5   59.09    5.40
   4   5   5   52.59    4.70
   5   5   5   52.69    4.80
   5   5   5   49.60    5.20
  -6   5   6   38.80    5.10
  -6   5   6   43.20    4.50
  -5   5   6   19.90    4.10
  -5   5   6   16.30    3.30
  -4   5   6   88.89    5.20
  -4   5   6   77.69    5.90
  -3   5   6  548.55   10.70
  -3   5   6  533.65   12.00
  -2   5   6    0.60    2.40
  -2   5   6   -2.00    2.00
  -1   5   6  251.17    7.00
  -1   5   6  241.68    8.00
   0   5   6   11.70    3.00
   0   5   6    7.00    2.40
   1   5   6  129.79    5.50
   1   5   6  120.69    6.40
   2   5   6  271.87    7.80
   2   5   6  281.27    9.20
   3   5   6  727.93   15.50
   3   5   6  748.13   13.70
   4   5   6   -1.20    2.80
   4   5   6   -0.40    3.10
  -5   5   7  121.79    7.80
  -5   5   7  141.59    7.00
  -4   5   7   97.59    5.70
  -4   5   7  100.49    7.00
  -3   5   7   32.80    4.60
  -3   5   7   33.60    3.70
  -2   5   7  130.09    7.00
  -2   5   7  114.29    5.70
  -1   5   7   51.99    4.20
  -1   5   7   55.79    5.20
   0   5   7  586.64   13.60
   0   5   7  593.64   11.70
   1   5   7    2.00    3.10
   1   5   7    2.40    2.70
   2   5   7  115.19    7.20
   2   5   7  126.09    6.30
   3   5   7   80.89    6.80
   3   5   7   78.39    5.60
  -4   5   8   47.80    4.50
  -4   5   8   43.90    5.90
  -3   5   8  121.49    6.30
  -3   5   8  113.99    7.60
  -2   5   8    1.80    3.40
  -2   5   8    8.40    3.30
  -1   5   8  253.67    8.20
  -1   5   8  272.57    9.80
   0   5   8   47.10    4.40
   0   5   8   43.00    5.10
   1   5   8    6.30    3.50
   1   5   8    1.70    2.80
   0  -6   8  115.39    7.00
  -1  -6   8  129.69    7.40
  -2  -6   8   70.69    5.80
   2  -6   7   44.20    4.70
   1  -6   7   -0.70    2.70
   0  -6   7   31.60    4.20
  -1  -6   7   -1.50    2.70
   2   6  -7  245.08    8.10
  -2  -6   7  222.18    8.20
   3   6  -7    8.30    2.80
  -3  -6   7    5.30    3.20
   4   6  -7  384.06   11.20
   4   6  -7  390.76   10.60
  -4  -6   7  386.66   10.70
   5   6  -7   18.70    4.20
   5   6  -7   20.00    4.20
  -5  -6   7   23.20    4.00
  -4   6  -6   16.50    3.90
   4  -6   6   20.20    4.70
  -3   6  -6   -4.30    2.60
   3  -6   6   -1.00    2.70
  -2   6  -6   -1.40    2.20
   2  -6   6   -4.70    2.30
  -1   6  -6  454.85   10.00
   1  -6   6  463.05   10.80
   0   6  -6   76.99    4.60
   0  -6   6   84.69    5.40
   1   6  -6  370.16    9.40
  -1  -6   6  365.46    9.40
   2   6  -6    1.80    2.30
  -2  -6   6    1.80    2.30
   3   6  -6   -3.80    2.30
  -3  -6   6   -0.30    2.40
   4   6  -6   45.50    4.60
   4   6  -6   51.99    4.80
  -4  -6   6   50.39    4.50
   5   6  -6   82.99    6.40
   5   6  -6   82.29    6.20
  -5  -6   6   90.49    6.10
  -5  -6   6   79.29    6.00
   6   6  -6  387.06   11.50
   6   6  -6  396.66   11.70
  -5   6  -5   51.09    5.30
  -4   6  -5  490.15   11.80
   4  -6   5  488.05   10.70
  -3   6  -5  152.08    6.60
   3  -6   5  163.28    6.40
  -2   6  -5  109.49    5.30
   2  -6   5  116.29    5.60
  -1   6  -5   64.49    4.10
   1  -6   5   70.49    4.70
   0   6  -5    1.80    1.80
   0  -6   5    9.40    2.50
   1   6  -5  192.08    6.60
   1   6  -5  188.58    6.00
  -1  -6   5  183.08    6.40
   2   6  -5  386.96    9.40
  -2  -6   5  390.66    9.20
   3   6  -5  160.08    6.50
   3   6  -5  158.08    6.60
  -3  -6   5  157.58    6.40
   4   6  -5  352.26    9.60
   4   6  -5  338.67    9.50
  -4  -6   5  359.76    9.00
   5   6  -5   13.40    3.70
   5   6  -5   14.20    3.50
  -5  -6   5   18.40    3.40
   6   6  -5    8.40    3.70
   6   6  -5   11.30    3.30
  -5   6  -4   14.40    3.60
   5  -6   4   18.70    3.80
  -4   6  -4   86.39    5.50
   4  -6   4   91.79    5.00
  -3   6  -4   28.60    3.50
   3  -6   4   24.90    3.00
  -2   6  -4   79.89    4.50
   2  -6   4   80.59    4.60
  -1   6  -4  851.91   13.90
   1  -6   4  865.71   13.90
   0   6  -4    4.10    1.80
   0   6  -4    2.70    1.90
   0  -6   4    4.50    1.90
   1   6  -4  583.54   11.10
  -1  -6   4  584.94   10.90
   2   6  -4  337.47    8.30
  -2  -6   4  332.17    8.00
   3   6  -4    6.50    2.40
   3   6  -4   11.10    2.60
  -3  -6   4    8.10    2.50
   4   6  -4   43.80    4.00
   4   6  -4   40.80    4.10
  -4  -6   4   50.89    3.90
   5   6  -4  319.37    9.50
   5   6  -4  321.47    9.10
  -5  -6   4  319.57    8.50
   6   6  -4   56.19    5.40
   6   6  -4   60.19    5.00
   7   6  -4  473.45   12.30
   7   6  -4  480.75   13.20
  -6   6  -3   15.20    3.90
   6  -6   3   16.60    3.70
  -5   6  -3    4.40    2.90
   5  -6   3    2.50    2.50
  -4   6  -3  901.61   15.90
   4  -6   3  873.21   13.30
  -3   6  -3   18.30    2.90
   3  -6   3   12.30    2.40
  -2   6  -3  625.94   11.60
   2  -6   3  641.64   11.00
  -1   6  -3  167.98    5.50
   1  -6   3  161.78    5.30
   0   6  -3    9.80    2.10
   0  -6   3   10.40    1.90
   1   6  -3  698.63   12.00
  -1  -6   3  695.83   11.60
   2   6  -3  517.35   10.20
  -2  -6   3  512.85    9.80
   3   6  -3    0.10    2.00
   3   6  -3   -0.80    1.70
  -3  -6   3   -0.80    1.90
   4   6  -3  828.12   14.50
   4   6  -3  809.52   13.70
  -4  -6   3  831.22   13.60
   5   6  -3   35.20    3.60
   5   6  -3   31.50    4.00
  -5  -6   3   27.50    3.20
   6   6  -3    4.50    3.30
   6   6  -3    9.20    3.00
   7   6  -3   57.59    5.10
   7   6  -3   51.79    5.40
  -7   6  -2  524.65   14.10
   7  -6   2  518.85   13.80
  -6   6  -2  170.18    7.70
   6  -6   2  179.48    7.90
  -5   6  -2  171.88    7.20
   5  -6   2  189.58    7.30
  -4   6  -2   71.99    4.70
   4  -6   2   77.09    3.80
  -3   6  -2    1.70    2.00
   3  -6   2    3.30    1.60
  -2   6  -2  293.07    7.30
   2  -6   2  295.27    6.60
  -1   6  -2  598.74   10.60
   1  -6   2  578.24    9.90
   0   6  -2   96.79    4.20
   0  -6   2   95.69    4.00
   1   6  -2 1013.90   14.90
  -1  -6   2 1032.30   14.70
   2   6  -2  474.05    8.60
   2   6  -2  494.05    9.60
  -2  -6   2  480.55    9.20
   3   6  -2    3.10    1.70
   3   6  -2    1.90    1.90
  -3  -6   2    2.70    1.90
   4   6  -2  131.69    4.40
   4   6  -2  143.79    6.00
   4   6  -2  134.29    5.20
  -4  -6   2  136.49    5.30
   5   6  -2  211.18    7.70
   5   6  -2  217.18    6.70
   5   6  -2  209.58    5.90
  -5  -6   2  219.78    6.70
   6   6  -2  132.59    6.10
   6   6  -2  136.29    7.20
   7   6  -2  526.65   13.40
   7   6  -2  508.35   11.80
  -7   6  -1   46.00    5.20
   7  -6   1   45.70    5.00
  -6   6  -1   -1.30    2.50
   6  -6   1    0.00    2.50
  -5   6  -1    1.60    2.30
   5  -6   1    1.40    2.30
  -4   6  -1  770.02   13.80
  -4   6  -1  773.52   11.60
   4  -6   1  771.12   13.30
   4  -6   1  764.72   11.20
  -3   6  -1  825.92   13.70
   3  -6   1  810.82   11.90
  -2   6  -1  504.35    9.60
   2  -6   1  512.45    8.80
  -1   6  -1  232.08    6.10
  -1   6  -1  228.48    6.00
   1  -6   1  221.78    5.60
   0   6  -1   47.70    3.10
   0  -6   1   45.30    2.90
   1   6  -1   15.00    2.00
  -1  -6   1   17.20    2.10
   2   6  -1  693.13   10.30
   2   6  -1  701.03   11.60
  -2  -6   1  680.53   11.20
   3   6  -1  124.19    5.10
   3   6  -1  121.09    4.20
   3   6  -1  120.69    4.10
  -3  -6   1  122.39    4.70
   4   6  -1 1116.19   15.40
   4   6  -1 1109.99   15.00
   4   6  -1 1099.99   17.10
  -4  -6   1 1124.29   16.10
   5   6  -1   -1.10    1.90
   5   6  -1   -0.80    2.10
   5   6  -1   -0.40    2.40
  -5  -6   1    1.50    2.10
   6   6  -1    3.80    2.70
   6   6  -1   -1.00    2.40
   6   6  -1    5.60    3.30
   7   6  -1    5.30    3.60
   7   6  -1    7.40    3.10
  -7   6   0  616.94   14.30
   7  -6   0  621.94   14.20
  -6   6   0  436.66   11.00
   6  -6   0  443.96   11.10
  -5   6   0  106.89    5.40
  -5   6   0  113.89    4.90
   5  -6   0  110.79    5.50
  -4   6   0    4.50    1.90
  -4   6   0    3.30    1.70
   4  -6   0    0.30    1.30
   4  -6   0   -0.60    1.70
  -3   6   0    7.80    1.90
  -3   6   0    6.90    1.80
   3  -6   0   11.70    1.80
   3  -6   0    9.40    1.90
  -2   6   0   19.40    2.00
  -2   6   0   18.80    2.30
   2  -6   0   21.30    2.20
  -1   6   0 1343.27   16.10
  -1   6   0 1375.16   17.70
   1  -6   0 1349.86   17.30
   0   6   0  137.99    4.50
   0   6   0  137.09    3.80
   0  -6   0  139.29    4.40
   1   6   0 1355.96   16.20
   1   6   0 1355.46   17.60
  -1  -6   0 1357.96   17.70
   2   6   0   18.80    2.00
   2   6   0   17.00    2.30
  -2  -6   0   20.00    2.40
   3   6   0    7.80    2.20
   3   6   0   10.20    1.70
   3   6   0    7.70    1.90
  -3  -6   0   12.30    2.20
   4   6   0    1.70    2.00
   4   6   0    0.90    2.20
   4   6   0   -0.40    1.50
  -4  -6   0   -1.00    1.80
   5   6   0  122.49    6.20
   5   6   0  115.69    5.40
  -5  -6   0  120.29    5.20
   6   6   0  461.75   11.70
   6   6   0  473.55   10.40
   7   6   0  654.93   13.30
   7   6   0  656.53   15.00
  -7   6   1    1.60    3.00
   7  -6  -1   -1.40    3.20
  -6   6   1    3.60    2.70
  -6   6   1    0.50    2.40
   6  -6  -1    1.70    2.50
  -5   6   1    0.40    2.10
  -5   6   1    1.20    1.90
   5  -6  -1    0.50    2.00
  -4   6   1 1079.49   15.30
  -4   6   1 1058.29   16.30
   4  -6  -1 1085.29   15.90
   4  -6  -1 1058.29   14.70
  -3   6   1  116.09    4.60
  -3   6   1  117.19    4.30
   3  -6  -1  115.49    4.20
   3  -6  -1  114.59    3.80
  -2   6   1  680.23   11.20
  -2   6   1  683.03   10.30
   2  -6  -1  690.83   10.40
   2  -6  -1  673.23   10.10
  -1   6   1   18.70    2.00
   1  -6  -1   14.60    1.90
   0   6   1   43.70    2.90
   0   6   1   42.60    2.70
   0  -6  -1   46.10    2.90
   1   6   1  225.88    5.60
   1   6   1  228.38    5.30
  -1  -6  -1  220.38    5.70
   2   6   1  523.45    9.40
   2   6   1  517.35    8.80
  -2  -6  -1  514.95    9.50
   3   6   1  841.72   12.70
   3   6   1  857.01   13.40
  -3  -6  -1  850.31   13.30
   4   6   1  807.22   13.10
   4   6   1  824.62   13.90
  -4  -6  -1  817.32   13.30
   5   6   1    2.00    2.70
   5   6   1    0.30    2.50
  -5  -6  -1    0.10    2.20
   6   6   1    1.10    3.10
   6   6   1   -2.90    3.00
   7   6   1   46.30    5.30
   7   6   1   46.70    4.90
  -7   6   2  481.85   12.10
   7  -6  -2  497.05   12.10
   7  -6  -2  482.85   12.20
  -6   6   2  135.89    6.10
  -6   6   2  139.69    6.20
   6  -6  -2  140.09    6.50
  -5   6   2  217.48    6.90
  -5   6   2  204.28    6.60
   5  -6  -2  206.38    6.70
  -4   6   2  127.89    5.10
  -4   6   2  140.69    5.20
   4  -6  -2  129.49    5.00
  -3   6   2    1.30    1.50
  -3   6   2    1.70    1.70
   3  -6  -2    1.30    1.30
   3  -6  -2    0.30    1.40
  -2   6   2  474.55    8.60
  -2   6   2  473.15    8.70
   2  -6  -2  470.35    8.30
   2  -6  -2  459.15    7.60
  -1   6   2 1018.00   13.90
   1  -6  -2 1030.00   14.30
   0   6   2   94.39    3.70
   0   6   2   99.09    3.60
   0   6   2   99.19    4.00
   0  -6  -2  101.19    4.00
   1   6   2  580.24    9.60
   1   6   2  579.64   10.10
   1   6   2  581.84    9.30
  -1  -6  -2  571.44   10.10
   2   6   2  309.37    6.80
   2   6   2  307.57    6.90
  -2  -6  -2  286.77    7.20
   3   6   2    2.70    2.00
   3   6   2    2.10    2.00
  -3  -6  -2    2.90    2.00
   4   6   2   75.19    4.80
   4   6   2   79.89    4.80
   5   6   2  183.08    7.10
   5   6   2  200.58    7.50
   6   6   2  172.58    8.00
   6   6   2  173.48    7.50
   7   6   2  522.05   13.00
   7   6   2  551.54   13.80
  -7   6   3   57.39    5.00
  -7   6   3   56.59    5.00
   7  -6  -3   53.89    5.30
  -6   6   3    5.20    2.90
  -6   6   3    4.50    2.50
   6  -6  -3    4.20    2.70
  -5   6   3   32.10    3.40
  -5   6   3   35.00    3.60
  -5   6   3   30.60    3.60
   5  -6  -3   32.80    3.30
  -4   6   3  798.72   13.10
  -4   6   3  782.92   12.80
  -4   6   3  776.12   12.90
   4  -6  -3  796.52   12.60
  -3   6   3    0.90    1.40
  -3   6   3    2.70    1.80
  -3   6   3    1.50    1.90
   3  -6  -3    0.50    1.40
  -2   6   3  510.95    9.30
  -2   6   3  514.85    9.10
  -2   6   3  522.35    9.40
  -1   6   3  702.33   11.60
  -1   6   3  729.03   11.40
   0   6   3    9.20    1.50
   0   6   3   11.60    2.00
   0   6   3   13.50    2.30
   1   6   3  153.28    5.10
   1   6   3  163.78    5.70
   1   6   3  156.28    4.40
   2   6   3  635.84   10.20
   2   6   3  627.04   11.90
   2   6   3  647.24   11.00
   3   6   3   14.30    2.40
   3   6   3   15.90    2.80
   4   6   3  945.91   15.00
   4   6   3  919.61   15.10
   5   6   3    1.50    2.90
   5   6   3    4.50    3.10
   6   6   3   22.50    4.10
   6   6   3   13.40    4.00
  -7   6   4  487.65   11.90
   7  -6  -4  458.45   12.00
  -6   6   4   59.19    6.60
  -6   6   4   63.39    4.90
   6  -6  -4   52.89    4.50
  -5   6   4  318.27    8.90
  -5   6   4  329.87    8.80
   5  -6  -4  314.77    8.20
  -4   6   4   43.40    3.40
  -4   6   4   41.10    3.80
  -4   6   4   49.50    3.90
  -3   6   4   10.00    2.30
  -3   6   4    7.00    2.40
  -3   6   4    7.80    1.70
  -2   6   4  332.57    8.00
  -2   6   4  336.17    6.80
  -2   6   4  332.07    7.70
  -1   6   4  583.14   10.50
  -1   6   4  595.04   11.20
   0   6   4    3.60    2.30
   0   6   4    2.00    1.80
   1   6   4  890.41   15.00
   1   6   4  871.51   13.70
   2   6   4   74.99    5.20
   2   6   4   87.79    4.80
   3   6   4   28.10    3.70
   3   6   4   33.30    3.60
   4   6   4  106.49    6.00
   5   6   4   17.30    3.80
  -6   6   5    8.80    3.20
  -6   6   5    9.10    3.60
  -5   6   5   10.40    3.30
  -5   6   5   14.90    3.30
  -4   6   5  348.37    8.90
  -4   6   5  344.17    9.40
  -3   6   5  139.29    5.70
  -3   6   5  151.18    6.40
  -2   6   5  395.46    9.50
  -2   6   5  376.46    8.70
  -1   6   5  185.38    6.20
  -1   6   5  197.48    7.00
   0   6   5    4.40    2.20
   0   6   5    4.40    2.60
   1   6   5   68.99    4.50
   1   6   5   65.59    5.10
   2   6   5  110.39    6.30
   2   6   5  108.09    5.50
   3   6   5  163.48    6.70
   3   6   5  155.58    7.60
   4   6   5  519.75   13.10
   4   6   5  493.25   11.50
   5   6   5   54.39    5.10
   5   6   5   83.09    7.20
  -6   6   6  370.56   11.60
  -6   6   6  374.46   10.40
  -5   6   6   91.19    5.80
  -5   6   6   91.69    6.80
  -4   6   6   57.89    5.10
  -4   6   6   40.10    4.20
  -3   6   6   -1.70    2.70
  -3   6   6   -1.30    2.40
  -2   6   6    1.70    2.40
  -2   6   6   -0.20    2.70
  -1   6   6  367.56   10.20
  -1   6   6  370.76    9.00
   0   6   6   85.09    6.00
   0   6   6   84.09    5.20
   1   6   6  488.35   12.10
   1   6   6  462.85   10.50
   2   6   6    2.40    2.80
   2   6   6   -5.50    2.70
   3   6   6   -1.00    3.30
   3   6   6   -3.30    2.90
   4   6   6   29.30    4.30
   4   6   6   20.40    4.60
  -5   6   7   19.00    3.60
  -5   6   7   19.70    4.70
  -4   6   7  401.36   11.80
  -4   6   7  393.36   10.40
  -3   6   7    5.90    3.00
  -3   6   7    6.50    3.80
  -2   6   7  235.68    9.10
  -2   6   7  237.98    8.00
  -1   6   7   -1.60    2.70
  -1   6   7    1.70    3.10
   0   6   7   28.90    3.80
   0   6   7   37.50    4.80
   1   6   7    5.80    3.70
   1   6   7    7.20    3.00
   2   6   7   37.70    4.30
   2   6   7   57.39    5.90
  -2   6   8   78.29    5.70
  -2   6   8   70.19    6.60
  -1   6   8  133.69    8.40
  -1   6   8  138.69    7.10
   0   6   8  119.59    8.60
   0   6   8  115.49    6.70
   1  -7   7   77.39    5.80
   0  -7   7    5.00    3.10
  -1  -7   7  126.89    7.00
   2   7  -7  221.08    8.40
  -2  -7   7  226.48    8.60
   3   7  -7   17.30    3.70
  -3  -7   7    4.90    3.40
  -3   7  -6   41.30    4.70
   3  -7   6   37.20    4.40
  -2   7  -6   56.69    5.00
   2  -7   6   41.90    4.50
  -1   7  -6   34.80    3.80
   1  -7   6   40.50    4.40
   0   7  -6   11.70    2.90
   0  -7   6   11.20    3.30
   1   7  -6  731.43   14.60
   1   7  -6  727.63   16.10
  -1  -7   6  751.02   14.50
   2   7  -6  147.09    6.80
  -2  -7   6  127.39    6.80
   3   7  -6   31.70    4.00
  -3  -7   6   33.60    4.10
   4   7  -6  115.49    7.10
   4   7  -6  122.29    6.70
  -4  -7   6  112.79    6.80
   5   7  -6  205.08    8.90
   5   7  -6  218.58    8.60
  -5  -7   6  178.38    8.10
  -4   7  -5   56.39    5.50
  -3   7  -5   -3.90    2.30
   3  -7   5   -1.90    2.70
  -2   7  -5  230.88    7.80
   2  -7   5  227.58    7.60
  -1   7  -5  217.88    7.20
   1  -7   5  210.48    7.40
   0   7  -5  270.57    7.80
   0  -7   5  282.37    8.30
   1   7  -5  169.88    6.30
   1   7  -5  177.68    6.90
  -1  -7   5  174.28    6.80
   2   7  -5  565.84   12.20
  -2  -7   5  566.14   11.90
   3   7  -5   -3.70    2.40
  -3  -7   5   -0.70    2.40
   4   7  -5   83.09    6.30
   4   7  -5   80.19    5.60
  -4  -7   5   85.99    5.80
   5   7  -5  144.79    7.80
   5   7  -5  146.59    7.20
  -5  -7   5  148.49    7.10
   6   7  -5   96.89    7.90
   6   7  -5   99.29    6.80
  -5   7  -4   10.00    3.70
   5  -7   4    2.30    3.30
  -4   7  -4  260.37    8.90
  -3   7  -4  692.43   13.90
   3  -7   4  697.43   12.80
  -2   7  -4  180.48    6.70
   2  -7   4  172.58    6.50
  -1   7  -4  124.89    5.50
   1  -7   4  127.99    5.70
   0   7  -4    9.70    2.50
   0   7  -4   10.00    2.40
   0  -7   4   11.20    2.50
   1   7  -4   67.29    4.70
  -1  -7   4   73.79    4.60
   2   7  -4  261.17    8.00
  -2  -7   4  289.27    8.00
   3   7  -4   95.99    5.70
   3   7  -4   92.49    5.20
  -3  -7   4   93.59    5.40
   4   7  -4  150.88    6.40
   4   7  -4  145.69    7.10
  -4  -7   4  155.98    6.60
   5   7  -4   15.30    3.30
   5   7  -4   11.40    3.60
  -5  -7   4   11.10    3.20
   6   7  -4   -1.40    3.40
   6   7  -4    1.80    3.10
  -5   7  -3   53.99    5.30
   5  -7   3   57.79    5.20
  -4   7  -3    2.20    2.50
  -3   7  -3   15.20    3.00
   3  -7   3    8.40    2.30
  -2   7  -3   58.39    4.20
   2  -7   3   56.79    4.10
  -1   7  -3  194.68    6.40
   1  -7   3  195.18    6.30
   0   7  -3  172.38    6.10
   0  -7   3  171.38    5.90
   1   7  -3  325.97    8.30
  -1  -7   3  322.97    8.10
   2   7  -3   26.70    3.20
  -2  -7   3   18.00    2.80
   3   7  -3    0.40    2.00
   3   7  -3    4.10    2.50
  -3  -7   3   -0.50    2.20
   4   7  -3   76.69    5.50
   4   7  -3   65.49    4.70
  -4  -7   3   76.49    5.10
   5   7  -3  171.78    6.80
   5   7  -3  175.28    7.70
  -5  -7   3  188.78    6.90
   6   7  -3  803.02   16.60
   6   7  -3  813.12   15.30
  -6   7  -2   -0.10    2.90
   6  -7   2   -1.10    3.00
  -5   7  -2  191.08    7.80
   5  -7   2  182.88    7.60
  -4   7  -2  286.77    8.70
  -3   7  -2  349.77    9.10
   3  -7   2  362.16    7.80
  -2   7  -2  415.96    9.50
   2  -7   2  420.06    8.70
  -1   7  -2  137.29    5.40
   1  -7   2  140.79    5.10
   0   7  -2   24.50    2.80
   0  -7   2   30.50    3.00
   1   7  -2  630.04   11.60
  -1  -7   2  619.04   11.20
   2   7  -2  316.77    8.10
  -2  -7   2  328.27    7.90
   3   7  -2  854.11   14.80
   3   7  -2  873.01   13.50
  -3  -7   2  850.31   14.10
   4   7  -2  335.37    8.00
   4   7  -2  322.97    9.10
  -4  -7   2  327.07    8.40
   5   7  -2  105.79    6.60
   5   7  -2  115.99    5.50
  -5  -7   2  115.39    5.90
   6   7  -2    0.00    3.10
   6   7  -2    1.50    3.50
   7   7  -2  123.09    8.40
  -6   7  -1  325.97   10.10
   6  -7   1  317.17   10.00
  -5   7  -1   91.99    5.70
   5  -7   1   85.09    5.60
  -4   7  -1  147.39    5.10
  -4   7  -1  142.29    6.20
   4  -7   1  151.08    6.10
  -3   7  -1    2.70    1.90
   3  -7   1    3.90    1.70
  -2   7  -1  569.14   11.00
   2  -7   1  581.24   10.10
  -1   7  -1  303.67    7.70
   1  -7   1  304.37    7.10
   0   7  -1  121.89    4.90
   0  -7   1  120.19    4.60
   1   7  -1  431.96    9.00
  -1  -7   1  424.46    8.80
   2   7  -1  882.81   14.30
  -2  -7   1  855.51   13.80
   3   7  -1   -3.20    2.00
   3   7  -1    0.00    1.60
   3   7  -1   -0.70    1.80
  -3  -7   1   -0.90    1.90
   4   7  -1    1.70    2.00
   4   7  -1   -1.20    2.30
   4   7  -1   -1.40    1.80
  -4  -7   1    0.20    2.20
   5   7  -1  108.29    6.50
   5   7  -1  101.69    5.30
  -5  -7   1  107.69    5.70
   6   7  -1  268.17    8.10
   6   7  -1  270.97    9.80
   7   7  -1  299.97   10.90
   7   7  -1  304.47    9.40
  -7   7   0    7.70    3.80
   7  -7   0    9.80    3.80
  -6   7   0    6.70    2.90
   6  -7   0   13.70    3.20
  -5   7   0   68.39    4.60
  -5   7   0   72.09    5.10
   5  -7   0   75.69    5.00
  -4   7   0  402.36    9.80
  -4   7   0  409.36    8.40
   4  -7   0  404.16    9.20
  -3   7   0   63.29    3.70
  -3   7   0   70.59    4.30
   3  -7   0   69.19    3.60
   3  -7   0   70.79    3.90
  -2   7   0  308.37    7.70
  -2   7   0  312.27    6.50
   2  -7   0  326.77    7.10
  -1   7   0  780.32   11.20
   1  -7   0  796.12   12.40
   0   7   0   -1.00    1.50
   0   7   0    0.50    1.40
   0  -7   0   -1.70    1.40
   1   7   0  784.32   11.20
   1   7   0  779.52   12.60
  -1  -7   0  780.62   12.70
   2   7   0  324.67    7.90
   2   7   0  321.67    6.80
  -2  -7   0  331.47    7.80
   3   7   0   72.19    4.10
   3   7   0   70.49    4.90
  -3  -7   0   74.69    4.40
   4   7   0  440.26   10.30
   4   7   0  420.56    8.90
  -4  -7   0  439.06    9.60
   5   7   0   75.39    5.10
   5   7   0   76.09    6.00
  -5  -7   0   84.89    5.30
   6   7   0    7.10    3.50
   6   7   0    8.00    3.40
   7   7   0   14.00    4.30
   7   7   0   12.90    4.10
  -7   7   1  287.37   10.00
   7  -7  -1  291.67   10.00
  -6   7   1  272.97    8.20
  -6   7   1  272.27    8.90
   6  -7  -1  257.67    8.70
  -5   7   1   86.19    4.90
  -5   7   1   88.49    5.20
   5  -7  -1   93.99    5.30
  -4   7   1   -0.70    2.00
  -4   7   1   -0.20    1.90
   4  -7  -1   -1.80    1.60
  -3   7   1    1.00    1.70
  -3   7   1   -1.60    1.60
   3  -7  -1   -0.10    1.40
   3  -7  -1    1.20    1.50
  -2   7   1  861.81   13.80
  -2   7   1  843.92   12.40
   2  -7  -1  837.82   12.70
   2  -7  -1  827.22   12.10
  -1   7   1  421.66    7.90
   1  -7  -1  421.56    8.40
   0   7   1  111.89    4.10
   0   7   1  115.09    4.50
   0  -7  -1  117.39    4.60
   1   7   1  300.77    7.10
   1   7   1  307.17    6.70
   1   7   1  313.37    6.90
  -1  -7  -1  293.07    7.20
   2   7   1  602.14   10.90
   2   7   1  606.34   10.20
  -2  -7  -1  592.14   11.10
   3   7   1    3.70    2.20
   3   7   1    2.50    2.20
  -3  -7  -1    4.50    2.20
   4   7   1  170.78    6.20
   4   7   1  155.68    6.60
  -4  -7  -1  155.18    6.20
   5   7   1   87.79    5.60
   5   7   1  108.99    6.50
  -5  -7  -1   97.09    5.70
   6   7   1  342.07   10.60
   6   7   1  325.27    9.80
  -7   7   2  132.79    7.20
  -7   7   2  117.99    7.30
   7  -7  -2  132.79    7.40
  -6   7   2    1.40    2.70
  -6   7   2    7.00    2.80
   6  -7  -2    2.90    2.70
  -5   7   2  110.89    5.60
  -5   7   2  113.69    5.50
   5  -7  -2  102.69    5.50
  -4   7   2  319.07    7.80
  -4   7   2  308.27    8.10
   4  -7  -2  303.07    7.60
  -3   7   2  821.62   13.60
  -3   7   2  837.92   13.10
   3  -7  -2  826.32   12.60
   3  -7  -2  825.82   12.50
  -2   7   2  323.57    7.60
  -2   7   2  325.47    7.40
   2  -7  -2  320.37    7.30
  -1   7   2  626.74   10.50
   1  -7  -2  624.04   10.90
   0   7   2   26.20    2.60
   0   7   2   26.80    2.70
   0   7   2   18.10    2.20
   0  -7  -2   20.50    2.50
   1   7   2  144.69    5.30
   1   7   2  128.49    4.80
   1   7   2  136.99    4.80
  -1  -7  -2  139.59    5.20
   2   7   2  418.86    8.60
   2   7   2  413.16    8.70
  -2  -7  -2  418.46    9.30
   3   7   2  375.16    8.60
   3   7   2  359.46    8.50
  -3  -7  -2  357.06    8.90
   4   7   2  285.97    8.00
   4   7   2  279.37    8.20
   5   7   2  181.78    7.70
   5   7   2  185.88    7.40
   6   7   2   -0.80    3.60
   6   7   2   -2.10    3.40
  -6   7   3  739.83   14.40
  -6   7   3  767.32   14.50
   6  -7  -3  774.32   14.70
  -5   7   3  177.18    6.80
  -5   7   3  170.78    6.50
   5  -7  -3  159.68    6.50
  -4   7   3   68.69    4.30
  -4   7   3   69.19    4.70
  -3   7   3   -0.80    1.60
  -3   7   3    1.60    2.10
  -2   7   3   22.20    2.60
  -2   7   3   19.20    2.50
  -2   7   3   13.30    2.60
  -1   7   3  335.27    7.70
  -1   7   3  319.17    7.60
   0   7   3  183.08    6.10
   0   7   3  163.98    6.00
   0   7   3  180.48    5.70
   1   7   3  197.88    6.10
   1   7   3  207.58    6.10
   1   7   3  184.28    6.40
   2   7   3   53.19    4.00
   2   7   3   51.99    3.90
   2   7   3   58.79    4.60
   3   7   3   11.60    2.90
   3   7   3    9.80    2.70
   4   7   3    2.90    3.10
   4   7   3    3.30    3.10
   5   7   3   50.59    6.70
   5   7   3   57.89    5.00
  -6   7   4    1.80    3.00
  -5   7   4   14.30    3.30
  -4   7   4  147.79    6.20
  -4   7   4  145.69    6.30
  -3   7   4   92.29    4.30
  -3   7   4   91.39    5.10
  -3   7   4   90.19    5.10
  -2   7   4  273.67    7.50
  -2   7   4  278.07    7.70
  -2   7   4  276.57    6.70
  -1   7   4   72.19    4.80
  -1   7   4   82.29    4.70
   0   7   4   10.80    2.50
   0   7   4    8.10    2.70
   1   7   4  132.99    6.30
   1   7   4  130.89    5.50
   2   7   4  172.08    7.20
   2   7   4  179.68    6.50
   3   7   4  702.73   14.60
   3   7   4  701.03   13.20
   4   7   4  268.07    8.70
   4   7   4  274.67    9.80
   5   7   4    3.10    3.80
  -6   7   5   99.69    7.00
  -5   7   5  138.09    7.30
  -5   7   5  149.79    6.90
  -4   7   5   83.29    5.50
  -4   7   5   77.19    5.80
  -3   7   5   -5.80    2.20
  -3   7   5   -5.20    2.50
  -2   7   5  563.04   11.40
  -2   7   5  562.34   12.00
  -1   7   5  176.98    7.10
  -1   7   5  179.38    6.50
   0   7   5  276.87    8.90
   0   7   5  285.77    8.00
   1   7   5  228.78    8.40
   1   7   5  235.58    7.60
   2   7   5  258.37    9.20
   2   7   5  259.07    8.10
   3   7   5   -4.70    2.70
   3   7   5   -5.50    2.80
   4   7   5   62.69    5.20
   4   7   5   56.89    5.90
  -5   7   6  184.58    8.80
  -5   7   6  193.38    7.70
  -4   7   6  119.19    6.50
  -4   7   6  111.99    7.10
  -3   7   6   26.30    4.40
  -3   7   6   34.60    4.10
  -2   7   6  146.89    6.70
  -2   7   6  129.19    7.20
  -1   7   6  769.02   14.10
  -1   7   6  757.82   15.40
   0   7   6   18.40    3.90
   0   7   6   11.90    3.30
   1   7   6   31.90    4.60
   1   7   6   35.20    4.20
   2   7   6   39.70    4.90
   2   7   6   53.39    4.80
   3   7   6   51.29    4.90
   3   7   6   36.60    5.80
  -3   7   7   11.90    3.50
  -3   7   7   12.00    4.10
  -2   7   7  208.38    9.10
  -2   7   7  217.98    8.20
  -1   7   7  128.69    6.90
  -1   7   7  127.09    7.70
   0   7   7    3.20    3.10
   0   7   7   -2.30    3.40
   1   7   7   91.19    7.80
   1   7   7   83.89    6.20
  -2   8  -6  160.48    7.50
   2  -8   6  151.18    7.60
  -1   8  -6    8.70    3.00
   1  -8   6    6.60    3.40
   0   8  -6   28.10    3.80
   0  -8   6   23.60    4.00
   1   8  -6  104.49    6.70
   1   8  -6  128.09    7.00
  -1  -8   6  107.69    6.50
   2   8  -6  530.35   12.80
  -2  -8   6  510.55   12.50
   3   8  -6   19.50    3.80
  -3  -8   6   14.90    3.60
   4   8  -6  150.28    8.20
  -4  -8   6  158.98    8.20
  -3   8  -5  244.28    9.00
   3  -8   5  241.38    8.40
  -2   8  -5  114.59    6.40
   2  -8   5  126.09    6.50
  -1   8  -5   83.99    5.50
   1  -8   5   81.69    5.60
   0   8  -5   46.20    4.40
   0  -8   5   40.80    4.30
   1   8  -5  405.96   10.20
   1   8  -5  408.36   10.90
  -1  -8   5  409.36   10.50
   2   8  -5   43.70    4.50
  -2  -8   5   30.80    4.00
   3   8  -5   22.00    3.90
  -3  -8   5   20.80    3.70
   4   8  -5   11.30    3.80
  -4  -8   5   16.30    3.60
   5   8  -5   40.60    4.70
   5   8  -5   36.10    5.40
  -5  -8   5   32.60    4.60
  -4   8  -4   62.09    5.80
  -3   8  -4   85.49    5.80
   3  -8   4   79.79    5.60
  -2   8  -4  173.68    7.20
   2  -8   4  174.78    7.00
  -1   8  -4   38.00    4.10
   1  -8   4   31.60    3.80
   0   8  -4  274.17    8.70
   0   8  -4  285.57    8.50
   0  -8   4  290.17    8.40
   1   8  -4  137.49    6.50
  -1  -8   4  131.09    6.20
   2   8  -4  204.18    7.80
  -2  -8   4  195.48    7.40
   3   8  -4    5.70    3.10
  -3  -8   4    4.20    2.60
   4   8  -4  161.88    7.80
   4   8  -4  167.98    7.00
  -4  -8   4  148.89    7.20
   5   8  -4  100.79    6.30
   5   8  -4  110.69    7.60
  -5  -8   4  105.39    6.60
  -5   8  -3   54.89    5.80
   5  -8   3   63.39    5.80
  -4   8  -3  105.69    6.50
  -3   8  -3  744.03   14.90
   3  -8   3  736.13   13.30
  -2   8  -3  199.48    7.30
   2  -8   3  189.68    6.80
  -1   8  -3  241.98    7.70
   1  -8   3  239.48    7.40
   0   8  -3    2.70    2.20
   0   8  -3    0.90    2.00
   0  -8   3    0.70    2.20
   1   8  -3  238.98    7.80
  -1  -8   3  246.78    7.50
   2   8  -3  140.59    6.50
  -2  -8   3  143.19    6.30
   3   8  -3  470.55   11.30
  -3  -8   3  465.85   10.70
   4   8  -3   27.70    4.10
   4   8  -3   28.50    3.60
  -4  -8   3   32.00    3.90
   5   8  -3   20.60    3.50
   5   8  -3   20.90    4.50
  -5  -8   3   25.30    3.90
   6   8  -3   30.70    5.30
  -5   8  -2   28.50    4.30
   5  -8   2   40.70    4.60
  -4   8  -2  105.19    6.10
   4  -8   2  117.59    6.30
  -3   8  -2   19.00    3.30
   3  -8   2   19.80    2.90
  -2   8  -2  182.58    6.80
   2  -8   2  176.68    6.30
  -1   8  -2   54.99    4.20
   1  -8   2   55.89    4.10
   0   8  -2   77.99    4.70
   0  -8   2   76.89    4.60
   1   8  -2   49.90    4.10
  -1  -8   2   50.19    4.00
   2   8  -2  221.58    7.50
  -2  -8   2  229.68    7.30
   3   8  -2   62.19    4.80
  -3  -8   2   70.19    4.80
   4   8  -2   36.40    4.30
   4   8  -2   27.80    3.40
  -4  -8   2   23.90    3.50
   5   8  -2  113.09    7.30
  -5  -8   2  115.49    6.30
   6   8  -2  642.34   15.00
  -6   8  -1    8.70    3.60
   6  -8   1    4.50    3.20
  -5   8  -1   81.39    5.90
   5  -8   1   89.49    6.00
  -4   8  -1   20.00    3.40
   4  -8   1   21.70    3.30
  -3   8  -1   68.59    4.70
   3  -8   1   75.19    4.20
  -2   8  -1  126.69    5.60
   2  -8   1  124.69    5.10
  -1   8  -1  442.26   10.00
   1  -8   1  432.66    9.30
   0   8  -1    6.80    2.20
   0  -8   1   10.50    2.20
   1   8  -1 1091.79   17.00
  -1  -8   1 1075.19   16.60
   2   8  -1  368.26    9.20
  -2  -8   1  341.17    8.70
   3   8  -1  418.86   10.30
  -3  -8   1  420.06    9.90
   4   8  -1   14.20    2.80
   4   8  -1   24.30    3.80
  -4  -8   1   23.20    3.40
   5   8  -1   61.19    4.50
   5   8  -1   70.99    5.60
  -5  -8   1   75.69    5.50
   6   8  -1   40.10    5.20
   6   8  -1   28.00    4.30
  -6   8   0  302.57   10.20
   6  -8   0  318.57   10.10
  -5   8   0   90.89    5.20
  -5   8   0   85.69    5.90
   5  -8   0   86.59    5.70
  -4   8   0   88.09    4.70
  -4   8   0   83.79    5.40
   4  -8   0   89.29    5.10
  -3   8   0  156.88    6.30
  -3   8   0  159.08    5.40
   3  -8   0  147.89    5.20
   3  -8   0  157.18    5.70
  -2   8   0 1097.79   17.40
  -2   8   0 1090.79   15.00
   2  -8   0 1092.09   16.10
  -1   8   0  131.89    4.60
  -1   8   0  146.49    5.80
   1  -8   0  141.39    5.40
   0   8   0  118.79    4.40
   0   8   0  120.99    5.20
   0  -8   0  121.69    5.10
   1   8   0  131.99    5.60
   1   8   0  140.69    4.80
  -1  -8   0  142.49    5.50
   2   8   0 1121.79   15.50
   2   8   0 1146.49   17.40
  -2  -8   0 1104.59   17.30
   3   8   0  173.58    6.90
   3   8   0  161.98    5.60
  -3  -8   0  165.98    6.50
   4   8   0   71.59    5.00
   4   8   0   84.99    6.00
  -4  -8   0   93.19    5.60
   5   8   0   88.29    6.50
   5   8   0   86.79    5.60
  -5  -8   0   84.49    5.90
   6   8   0  338.27    9.90
   6   8   0  337.97   11.20
  -6   8   1   40.80    4.40
  -6   8   1   31.20    4.50
   6  -8  -1   33.90    4.20
  -5   8   1   65.79    4.90
  -5   8   1   62.59    5.10
   5  -8  -1   64.29    5.20
  -4   8   1   23.80    3.10
  -4   8   1   22.00    3.30
   4  -8  -1   18.10    2.80
  -3   8   1  387.16    8.40
  -3   8   1  389.16    9.50
   3  -8  -1  379.06    8.20
   3  -8  -1  370.16    8.30
  -2   8   1  343.57    7.60
  -2   8   1  350.16    8.70
   2  -8  -1  337.47    7.90
  -1   8   1 1064.79   14.90
   1  -8  -1 1044.10   15.90
   0   8   1    5.10    2.10
   0   8   1    7.50    2.10
   0  -8  -1    7.60    2.10
   1   8   1  436.36    8.90
   1   8   1  444.16    8.70
   1   8   1  430.86    9.30
  -1  -8  -1  424.46    9.40
   2   8   1  137.19    5.80
   2   8   1  141.49    5.30
  -2  -8  -1  130.79    5.70
   3   8   1   76.49    5.20
   3   8   1   75.39    4.80
  -3  -8  -1   76.59    5.10
   4   8   1   17.70    3.40
   4   8   1   11.80    3.20
  -4  -8  -1   16.90    3.30
   5   8   1   86.69    5.90
   5   8   1   81.69    6.30
  -5  -8  -1   94.29    6.40
   6   8   1    2.60    4.10
   6   8   1    6.50    3.90
  -6   8   2  615.24   12.80
  -6   8   2  562.74   13.40
   6  -8  -2  598.44   13.20
  -5   8   2  119.69    6.20
  -5   8   2  128.29    6.10
   5  -8  -2   97.99    7.20
  -4   8   2   23.50    3.30
  -4   8   2   22.10    3.10
  -3   8   2   54.09    4.20
  -3   8   2   53.89    4.00
   3  -8  -2   64.59    3.90
  -2   8   2  224.48    6.60
  -2   8   2  229.58    7.00
   2  -8  -2  230.08    6.70
  -1   8   2   54.59    3.90
   1  -8  -2   49.20    3.80
   0   8   2   84.19    4.60
   0   8   2   94.29    4.40
   0   8   2   78.99    4.40
   0  -8  -2   88.79    4.60
   1   8   2   52.09    4.00
   1   8   2   59.09    4.40
   1   8   2   56.49    4.20
  -1  -8  -2   49.20    4.00
   2   8   2  193.28    6.90
   2   8   2  186.98    6.30
   2   8   2  194.78    6.50
  -2  -8  -2  195.38    7.00
   3   8   2   16.10    3.10
   3   8   2   24.10    3.40
  -3  -8  -2   15.60    3.20
   4   8   2  118.99    6.40
   4   8   2  112.09    6.20
   5   8   2   38.40    4.80
   5   8   2   39.00    4.50
  -6   8   3   18.10    3.50
  -6   8   3   24.30    4.20
  -5   8   3   23.80    3.70
  -5   8   3   16.30    3.30
  -4   8   3   34.10    3.70
  -4   8   3   41.70    4.00
  -3   8   3  444.96    9.90
  -3   8   3  454.45    9.90
  -2   8   3  150.18    5.70
  -2   8   3  140.49    6.00
  -1   8   3  247.28    7.30
  -1   8   3  237.18    6.90
   1  -8  -3  238.48    7.20
   0   8   3    0.30    2.30
   0   8   3    0.30    2.30
   0  -8  -3    4.30    2.20
   1   8   3  248.38    7.40
   1   8   3  260.47    8.00
   2   8   3  198.58    7.60
   2   8   3  212.68    7.10
   3   8   3  790.02   15.50
   3   8   3  779.02   14.20
   4   8   3  116.69    6.60
   5   8   3   60.19    5.80
  -5   8   4   99.19    6.50
  -4   8   4  152.38    6.60
  -3   8   4    2.60    2.50
  -2   8   4  198.08    7.10
  -2   8   4  188.38    6.40
  -2   8   4  201.98    7.00
  -1   8   4  127.59    6.00
  -1   8   4  130.29    6.00
   0   8   4  287.67    8.70
   0   8   4  297.77    8.30
   1   8   4   38.00    4.30
   1   8   4   29.50    3.80
   2   8   4  165.88    7.00
   2   8   4  170.28    7.60
   3   8   4   94.79    6.20
   3   8   4   82.79    6.70
   4   8   4   55.49    5.60
   4   8   4   61.19    5.40
  -5   8   5   34.80    4.90
  -4   8   5    4.70    3.20
  -3   8   5   10.30    3.40
  -3   8   5   14.50    3.30
  -2   8   5   46.60    4.40
  -2   8   5   31.60    4.10
  -1   8   5  388.26    9.90
  -1   8   5  403.26   10.60
   0   8   5   45.20    4.40
   0   8   5   43.40    4.90
   1   8   5   83.19    5.70
   1   8   5   75.59    6.00
   2   8   5  133.19    6.70
   2   8   5  127.39    7.60
   3   8   5  245.48    9.00
   3   8   5  273.57   10.20
  -4   8   6  161.48    8.00
  -3   8   6   11.60    3.50
  -3   8   6   11.70    3.90
  -2   8   6  532.45   13.20
  -2   8   6  536.25   12.20
  -1   8   6  114.69    7.20
  -1   8   6  119.99    6.80
   0   8   6   26.70    4.30
   0   8   6   21.30    4.20
   1   8   6    0.00    3.50
   1   8   6    8.80    3.50
   2   8   6  157.78    9.30
   2   8   6  155.98    8.00
  -1   9  -5  244.28    8.80
   1  -9   5  263.17    9.10
   0   9  -5   -4.80    2.20
   0  -9   5    2.70    3.10
   1   9  -5  455.95   12.20
   1   9  -5  456.45   11.50
  -1  -9   5  431.66   11.60
   2   9  -5    2.20    2.90
  -2  -9   5    3.90    3.30
   3   9  -5    0.60    3.30
  -3  -9   5   -3.70    2.90
  -3   9  -4    0.10    2.90
   3  -9   4   -3.70    2.60
  -2   9  -4  292.77    9.60
   2  -9   4  283.37    9.00
  -1   9  -4    1.30    2.40
   1  -9   4    3.50    2.80
   0   9  -4    0.40    2.50
   0  -9   4   -3.30    2.30
   1   9  -4   87.49    6.10
  -1  -9   4   80.99    5.70
   2   9  -4  124.09    6.90
  -2  -9   4  102.09    6.50
   3   9  -4   11.20    3.50
  -3  -9   4    9.00    3.50
   4   9  -4  172.78    8.90
  -4  -9   4  168.48    7.90
  -4   9  -3    8.10    3.80
  -3   9  -3    0.90    2.60
   3  -9   3   -2.70    2.60
  -2   9  -3   32.60    4.20
   2  -9   3   32.30    3.90
  -1   9  -3  250.77    8.50
   1  -9   3  253.97    8.20
   0   9  -3    1.40    2.40
   0   9  -3    1.40    2.50
   0  -9   3    4.10    2.70
   1   9  -3  175.08    7.40
  -1  -9   3  175.38    7.10
   2   9  -3  139.09    7.00
  -2  -9   3  141.09    6.70
   3   9  -3    6.20    3.10
  -3  -9   3   15.30    3.30
   4   9  -3   -0.30    3.40
  -4  -9   3   -0.70    3.00
   5   9  -3  235.18   10.10
  -5  -9   3  229.38    8.80
  -4   9  -2  453.35   12.10
   4  -9   2  434.66   11.40
  -3   9  -2   38.30    4.50
   3  -9   2   38.10    3.90
  -2   9  -2  183.38    7.40
   2  -9   2  194.58    6.90
  -1   9  -2    0.90    2.40
   1  -9   2    3.30    2.40
   0   9  -2    1.50    2.40
   0  -9   2    9.80    2.80
   1   9  -2    4.70    2.60
  -1  -9   2    1.10    2.30
   2   9  -2  637.84   13.50
  -2  -9   2  588.04   12.50
   3   9  -2    4.70    3.20
  -3  -9   2    8.20    3.00
   4   9  -2  458.15   12.20
  -4  -9   2  445.36   11.30
   5   9  -2    9.10    4.20
  -5  -9   2    5.10    3.40
  -5   9  -1  139.39    7.40
   5  -9   1  145.99    7.50
  -4   9  -1  106.59    6.40
   4  -9   1  102.79    6.10
  -3   9  -1    3.10    2.50
   3  -9   1    1.40    2.10
  -2   9  -1    9.30    2.70
   2  -9   1   12.00    2.70
  -1   9  -1  494.95   11.40
   1  -9   1  504.95   10.80
   0   9  -1   42.60    4.10
   0  -9   1   37.20    3.70
   1   9  -1  412.66   10.20
  -1  -9   1  422.66   10.10
   2   9  -1   10.10    2.90
  -2  -9   1    7.40    2.70
   3   9  -1   64.09    5.20
  -3  -9   1   58.49    4.70
   4   9  -1   -0.80    3.10
  -4  -9   1    2.00    2.70
   5   9  -1  125.49    7.90
  -5  -9   1  141.09    7.20
  -5   9   0   -1.90    2.40
   5  -9   0    0.60    2.70
  -4   9   0  219.58    8.20
   4  -9   0  203.98    7.50
  -3   9   0  168.28    6.90
  -3   9   0  177.08    7.20
   3  -9   0  173.18    6.10
   3  -9   0  188.28    6.60
  -2   9   0  348.27    7.80
  -2   9   0  362.26    9.70
   2  -9   0  354.36    8.70
  -1   9   0   21.20    3.30
  -1   9   0   15.40    2.50
   1  -9   0   18.80    2.90
   0   9   0   -0.30    2.00
   0   9   0    0.80    2.20
   0  -9   0    6.50    2.20
   1   9   0   17.70    3.00
   1   9   0   16.90    2.70
  -1  -9   0   15.10    2.80
   2   9   0  356.16    8.00
   2   9   0  358.96    9.50
  -2  -9   0  356.06    9.40
   3   9   0  173.38    6.30
   3   9   0  186.28    7.70
  -3  -9   0  179.98    7.20
   4   9   0  239.78    8.90
   4   9   0  230.98    7.50
  -4  -9   0  222.38    8.20
   5   9   0   -5.60    3.40
   5   9   0    4.30    3.40
  -5  -9   0   10.00    3.30
  -5   9   1  106.09    6.60
  -5   9   1  110.89    6.00
  -4   9   1   -4.70    2.30
  -4   9   1    1.90    2.60
  -3   9   1   61.89    4.60
  -3   9   1   55.29    4.80
   3  -9  -1   60.39    4.20
  -2   9   1    5.80    2.40
  -2   9   1    7.50    2.80
   2  -9  -1    8.90    2.20
  -1   9   1  414.06    8.90
  -1   9   1  406.46   10.10
   1  -9  -1  439.16    9.80
   0   9   1   42.20    3.50
   0   9   1   35.00    3.50
   0  -9  -1   49.10    4.10
   1   9   1  503.65   10.80
   1   9   1  504.15   10.00
  -1  -9  -1  525.45   11.30
   2   9   1   12.80    2.80
   2   9   1   11.60    2.90
  -2  -9  -1    7.80    2.70
   3   9   1   -1.90    2.70
   3   9   1    0.40    2.90
  -3  -9  -1    2.60    2.70
   4   9   1  114.69    6.30
   4   9   1  108.69    6.90
  -4  -9  -1  108.69    6.70
   5   9   1  157.48    7.60
   5   9   1  147.29    8.20
  -5  -9  -1  166.58    8.10
  -5   9   2   -0.10    2.90
  -5   9   2    5.60    2.90
  -4   9   2  424.66    9.90
  -4   9   2  389.96   10.40
  -3   9   2    5.20    2.60
  -3   9   2    9.00    2.60
   3  -9  -2    6.80    2.20
  -2   9   2  590.34   12.30
  -2   9   2  606.44   11.50
   2  -9  -2  601.94   11.80
  -1   9   2   -1.90    2.30
  -1   9   2    0.00    2.10
   1  -9  -2    1.70    2.10
   0   9   2    5.10    2.60
   0   9   2    5.70    2.40
   0  -9  -2    6.50    2.50
   1   9   2    2.90    2.20
   1   9   2    2.30    2.50
  -1  -9  -2    4.70    2.50
   2   9   2  196.78    7.40
   2   9   2  203.08    7.00
   2   9   2  196.98    6.90
  -2  -9  -2  194.48    7.60
   3   9   2   42.50    4.30
   3   9   2   51.39    4.80
   3   9   2   43.80    4.30
  -3  -9  -2   39.60    4.40
   4   9   2  466.35   12.00
   4   9   2  470.75   11.30
  -5   9   3  206.38    8.00
  -5   9   3  221.68    8.30
  -4   9   3    1.10    2.50
  -4   9   3   -1.40    2.70
  -3   9   3   10.70    2.80
  -3   9   3    7.70    2.90
  -2   9   3  139.59    6.10
  -2   9   3  140.49    6.40
  -1   9   3  172.28    6.80
  -1   9   3  180.88    6.70
   1  -9  -3  178.08    6.80
   0   9   3    0.00    2.70
   0  -9  -3    0.80    2.30
   1   9   3  247.48    8.20
   1   9   3  255.57    8.00
   2   9   3   32.70    4.30
   2   9   3   29.00    3.90
   3   9   3   -0.70    3.20
   3   9   3   -5.10    3.10
   4   9   3   -1.10    3.90
   4   9   3    1.70    3.70
  -4   9   4  181.18    7.60
  -3   9   4    8.70    3.20
  -2   9   4  107.19    6.30
  -1   9   4   86.89    5.90
   0   9   4   -2.70    2.80
   0   9   4    2.20    3.10
   1   9   4    3.20    3.00
   1   9   4   -0.30    3.00
   2   9   4  306.07    9.30
   2   9   4  282.77   10.00
   3   9   4    5.30    3.90
   3   9   4   -1.60    3.40
  -3   9   5   -3.20    3.30
  -2   9   5   -1.90    3.10
  -1   9   5  419.16   11.00
  -1   9   5  434.26   11.40
   0   9   5    0.80    3.30
   0   9   5    1.70    3.20
   1   9   5  251.37    9.80
   1   9   5  253.37    9.10
  -1  10  -4   96.29    6.70
   1 -10   4  101.79    6.70
   0  10  -4   86.19    6.30
   0 -10   4   87.29    6.40
   1  10  -4   11.70    3.40
   1  10  -4   13.80    3.80
  -1 -10   4    3.50    3.10
   2  10  -4  152.18    8.50
  -2 -10   4  166.28    8.40
  -2  10  -3    9.50    3.40
   2 -10   3   14.00    3.40
  -1  10  -3  115.59    6.60
   1 -10   3  109.29    6.40
   0  10  -3   41.40    4.70
   0 -10   3   34.40    4.20
   1  10  -3  285.77    9.70
  -1 -10   3  305.77    9.60
   2  10  -3    9.30    3.40
  -2 -10   3    9.00    3.20
   3  10  -3  107.69    7.20
  -3 -10   3  120.19    7.30
  -3  10  -2  244.78    9.50
   3 -10   2  230.38    8.10
  -2  10  -2  154.28    7.30
   2 -10   2  140.19    6.50
  -1  10  -2   42.10    4.70
   1 -10   2   33.50    4.00
   0  10  -2  250.57    8.90
   0  10  -2  244.78    8.80
   0 -10   2  259.87    8.50
   1  10  -2    2.00    2.60
  -1 -10   2    1.70    2.50
   2  10  -2  223.18    8.80
  -2 -10   2  219.98    8.30
   3  10  -2   81.89    6.70
  -3 -10   2   85.49    6.30
   4  10  -2   72.19    6.30
  -4 -10   2   79.09    6.10
  -3  10  -1  521.95   13.00
   3 -10   1  516.55   15.30
   3 -10   1  502.85   11.30
  -2  10  -1  123.49    6.60
   2 -10   1  119.49    6.00
  -1  10  -1   49.99    4.90
   1 -10   1   54.09    4.60
   0  10  -1    4.50    2.70
   0 -10   1    5.30    2.70
   1  10  -1   58.89    5.00
  -1 -10   1   68.09    5.40
   2  10  -1   -0.40    3.00
  -2 -10   1    3.00    2.70
   3  10  -1  324.57   10.40
  -3 -10   1  324.87   10.00
   4  10  -1  124.09    7.90
  -4 -10   1  123.49    7.30
  -4  10   0   -0.60    2.60
  -3  10   0   31.20    4.20
   3 -10   0   22.80    3.40
  -2  10   0   28.90    4.10
   2 -10   0   21.10    3.20
  -1  10   0  118.49    6.40
   1 -10   0  122.49    6.00
   0  10   0  466.85   11.30
   0 -10   0  455.15   10.90
   1  10   0  127.79    6.50
  -1 -10   0  137.29    6.50
   2  10   0   25.80    3.60
  -2 -10   0   30.60    3.90
   3  10   0   33.50    4.50
  -3 -10   0   28.70    4.00
   4  10   0    0.90    3.60
  -4 -10   0    0.50    3.30
  -4  10   1  115.69    6.90
  -4  10   1  110.59    6.80
  -3  10   1  321.57    9.90
  -3  10   1  310.27    8.50
   3 -10  -1  317.27    8.80
  -2  10   1   -3.70    2.20
  -2  10   1   -0.10    2.40
   2 -10  -1    3.80    2.40
  -1  10   1   53.79    4.30
  -1  10   1   59.79    5.10
   1 -10  -1   54.09    4.60
   0  10   1    0.20    2.70
   0  10   1    4.20    2.50
   0 -10  -1    7.00    2.80
   1  10   1   61.09    5.10
   1  10   1   47.10    4.20
  -1 -10  -1   58.99    4.90
   2  10   1  118.49    6.10
   2  10   1  122.89    6.70
  -2 -10  -1  135.39    6.80
   3  10   1  540.15   11.60
   3  10   1  536.65   12.70
  -3 -10  -1  547.85   13.00
  -4  10   2   84.29    6.20
  -4  10   2   84.19    6.00
  -3  10   2   89.29    5.90
  -3  10   2   90.79    5.80
   3 -10  -2   84.79    5.50
  -2  10   2  206.78    7.20
  -2  10   2  198.58    7.80
   2 -10  -2  203.68    7.30
  -1  10   2    3.80    2.50
  -1  10   2   -5.90    2.50
   1 -10  -2    0.20    2.40
   0  10   2  253.17    8.00
   0 -10  -2  251.47    8.40
   1  10   2   43.10    4.30
  -1 -10  -2   27.40    3.90
   2  10   2  157.68    7.00
  -2 -10  -2  150.68    7.50
   3  10   2  259.27    8.90
  -3 -10  -2  252.87    9.70
  -3  10   3  109.69    6.30
  -3  10   3   98.99    6.10
  -2  10   3    9.80    2.90
  -2  10   3    6.10    3.10
  -1  10   3  292.67    8.90
  -1  10   3  293.17    9.00
   0  10   3   49.30    4.60
   1  10   3  106.29    6.50
   2  10   3    9.30    3.50
  -2  10   4  146.89    7.60
  -1  10   4    9.00    3.70
   0  10   4   96.79    6.80
   1  10   4  103.49    7.50
   0  11  -2    6.10    3.50
   0 -11   2    5.70    3.20
   1  11  -2   24.20    4.00
  -1 -11   2   20.10    3.90
  -1  11  -1   54.59    5.50
   1 -11   1   58.79    5.20
   0  11  -1  131.79    7.30
   0 -11   1  137.29    6.90
   1  11  -1   92.09    6.50
  -1 -11   1   94.59    6.20
  -1  11   0    3.60    2.80
   1 -11   0    4.50    2.70
   0 -11   0    3.10    2.80
   1  11   0    3.50    3.00
  -1 -11   0    2.80    2.60
  -2 -11   0  268.67    9.80
  -1  11   1   96.79    6.40
   1 -11  -1   96.99    6.10
   0 -11  -1  143.69    7.10
   1  11   1   57.09    4.90
  -1 -11  -1   54.89    5.20
  -1  11   2   17.50    3.80
  -1  11   2   21.50    4.00
   1 -11  -2   16.30    3.60
   0  11   2   -4.90    3.20
   0 -11  -2    1.80    2.90
   0   0   0    0.00    0.00

_computing_structure_solution     'SHELXT 2014/5 (Sheldrick, 2014)'
;
_shelx_hkl_checksum   66590
