# Supplementary material for: Mechanochemical synthesis of an elusive fluorinated polyacetylene
Source: Springer Nature journal article supplement (doi:10.1038/s41557-020-00608-8), 2020-12-21
Supplement: 41557_2020_608_MOESM25_ESM.mol [file 41557_2020_608_MOESM25_ESM.mol]

nchem.20061341B-compS6.mol
  ChemDraw11162014402D

 18 21  0  0  0  0  0  0  0  0999 V2000
   -0.4128    0.3019    0.0000 C   0  0  0  0  0  0  0  0  0  0  0  0
   -0.4128   -0.5231    0.0000 C   0  0  0  0  0  0  0  0  0  0  0  0
    0.4122   -0.5231    0.0000 C   0  0  0  0  0  0  0  0  0  0  0  0
    0.4122    1.1275    0.0000 C   0  0  0  0  0  0  0  0  0  0  0  0
   -0.8253   -1.2375    0.0000 C   0  0  0  0  0  0  0  0  0  0  0  0
   -0.4128   -1.9525    0.0000 C   0  0  0  0  0  0  0  0  0  0  0  0
    0.4122   -1.9525    0.0000 C   0  0  0  0  0  0  0  0  0  0  0  0
    0.8253   -1.2375    0.0000 C   0  0  0  0  0  0  0  0  0  0  0  0
   -1.2378    0.3019    0.0000 F   0  0  0  0  0  0  0  0  0  0  0  0
    1.2378    1.1275    0.0000 F   0  0  0  0  0  0  0  0  0  0  0  0
    1.2378   -0.5158    0.0000 H   0  0  0  0  0  0  0  0  0  0  0  0
   -1.2378   -0.5146    0.0000 H   0  0  0  0  0  0  0  0  0  0  0  0
   -0.4128    1.9525    0.0000 C   0  0  0  0  0  0  0  0  0  0  0  0
   -0.4128    1.1275    0.0000 C   0  0  0  0  0  0  0  0  0  0  0  0
   -1.2378    1.1275    0.0000 F   0  0  0  0  0  0  0  0  0  0  0  0
    0.4122    1.9525    0.0000 C   0  0  0  0  0  0  0  0  0  0  0  0
    0.4122    0.3019    0.0000 C   0  0  0  0  0  0  0  0  0  0  0  0
    1.2378    0.3019    0.0000 F   0  0  0  0  0  0  0  0  0  0  0  0
  1  2  1  0      
  2  3  1  0      
  3 17  1  0      
 17  1  1  0      
 17  4  1  0      
  4 14  1  0      
 14  1  1  0      
  4 16  1  0      
 16 13  2  0      
 13 14  1  0      
  2  5  1  0      
  5  6  1  0      
  6  7  1  0      
  7  8  1  0      
  8  3  1  0      
  1  9  1  6      
  4 10  1  1      
  3 11  1  1      
  2 12  1  1      
 14 15  1  1      
 17 18  1  6      
M  END
